# Supplementary material for: Detecting ancient positive selection in humans using extended lineage sorting
Source: HighWire-hosted journal article supplement (doi:10.1101/gr.219493.116), 2017-07-18
Supplement: Supplemental_Files_1-3.zip [file Supplemental_File_S3.xlsx]

## Sheet: description
Annotation of Variants in Sweep Regions: To identify regulatory variants falling in the candidate sweep regions, we used an updated list of "modern-human-specific sites” originally defined in Prufer et al. (2014) where Denisova or Altai Neandertal have the ancestral (chimpanzee-like) state and where the derived allele is either fixed or at high frequency (> 90%) in modern humans, using 1000 Genom…
sheet_name	description
legend	explanation of column names in the annotation file
annotation	annotation of variants in sweep regions for autosomes
annotation_chrX	annotation of variants in sweep regions for X chromosome
ROBO2_SLIT2_DCX	highlighted annotations for ROBO2, SLIT2, and DCX
References
Andersson R, Gebhard C, Miguel-Escalada I, Hoof I, Bornholdt J, Boyd M, Chen Y, Zhao X, Schmidl C, Suzuki T et al. 2014. “An atlas of active enhancers across human cell types and tissues.” Nature 507(7493):455–461.
Brawand D, Soumillon M, Necsulea A, Julien P, Csárdi G, Harrigan P, Weier M, Liechti A, Aximu-Petri A, Kircher M et al. 2011. “The evolution of gene expression levels in mammalian organs.” Nature 478(7369):343-348.
Davydov EV, Goode DL, Sirota M, Cooper GM, Sidow A, Batzoglou S. 2010. “Identifying a high fraction of the human genome to be under selective constraint \using GERP++.” PLoS Comput Biol. 6(12):e1001025. doi: 10.1371/journal.pcbi.1001025.
Fu Y, Liu Z, Lou S, Bedford J, Mu XJ, Yip KY, Khurana E, Gerstein M. 2014. “FunSeq2: a framework for prioritizing noncoding regulatory variants in cancer.” Genome Biol. 15(10):480. doi: 10.1186/s13059-014-0480-5
Gerstein MB, Kundaje A, Hariharan M, Landt SG, Yan KK, Cheng C, Mu XJ, Khurana E, Rozowsky J, Alexander R et al. 2012. “Architecture of the human regulatory network derived from ENCODE data.” Nature 489(7414):91-100.
Gittelman RM, Hun E, Ay F, Madeoy J, Pennacchio L, Noble WS, Hawkins RD, Akey JM. 2015. "Comprehensive identification and analysis of human accelerated regulatory DNA." Genome Research 25(9):1245-55
Gokhman D, Lavi E, Prüfer K, Fraga MF, Riancho JA, Kelso J, Pääbo S, Meshorer E, Carmel L. 2014. “Reconstructing the DNA methylation maps of the Neandertal and the Denisovan.” Science 344(6183):523-527.
GTEx Consortium, Ardlie KG, Deluca DS, Segrè AV, Sullivan TJ, Young TR, Gelfand ET, Trowbridge CA, Maller JB, Tukiainen T, Lek M et al. 2015. “Human genomics. The Genotype-Tissue Expression (GTEx) pilot analysis: multitissue gene regulation in humans.” Science 348(6235):648-660.
Gulko B, Hubisz MJ, Gronau I, Siepel A. 2015. “A method for calculating probabilities of fitness consequences for point mutations across the human genome”. Nature Genetics 47(3): 276-283.
Hong EL, Hariharan M, Cheng Y, Schaub MA, Kasowski M, Karczewski KJ, Park J, Hitz BC, Weng S et al. 2012. “Annotation of functional variation in personal genomes using RegulomeDB.” Genome Research 22(9):1790-1797.
Kircher M, Witten DM, Jain P, O'Roak BJ, Cooper GM, Shendure J. 2014. “A general framework for estimating the relative pathogenicity of human genetic variants.” Nature Genetics 46(3):310-315.
Lindblad-Toh K, Garber M, Zuk O, Lin MF, Parker BJ, Washietl S, Kheradpour P, Ernst J, Jordan G, Mauceli E et al. 2011. "A high-resolution map of human evolutionary constraint using 29 mammals." Nature 478(7370):476-482
McLean CY, Bristor D, Hiller M, Clarke SL, Schaar BT, Lowe CB, Wenger AM, Bejerano G. 2010. "GREAT improves functional interpretation of cis-regulatory regions." Nature Biotechnology 28(5):495-501.
Pollard KS, Hubisz MJ, Rosenbloom KR, Siepel A. 2010. “Detection of nonneutral substitution rates on mammalian phylogenies.” Genome Research 20(1):110-121.
Prabhakar S, Noonan JP, Pääbo S, Rubin EM. 2006. “Accelerated evolution of conserved noncoding sequences in humans.” Science 314(5800):786.
Prüfer K, Racimo F, Patterson N, Jay F, Sankararaman S, Sawyer S, Heinze A, Renaud G, Sudmant PH, de Filippo C et al. 2014. “The complete genome sequence of a Neandertal from the Altai Mountains.” Nature 505(7481): 43–49.
Roadmap Epigenomics Consortium, Kundaje A, Meuleman W, Ernst J, Bilenky M, Yen A, Heravi-Moussavi A, Kheradpour P, Zhang Z, Wang J, Ziller MJ et al. 2015. “Integrative analysis of 111 reference human epigenomes.” Nature 518(7539):317-330.
Rosenbloom KR, Sloan CA, Malladi VS, Dreszer TR, Learned K, Kirkup VM, Wong MC, Maddren M, Fang R, Heitner SG et al. 2012. “ENCODE data in the UCSC Genome Browser: year 5 update.” Nucleic Acids Res. 41(D1):D56-63. doi: 10.1093/nar/gks1172.
Siepel A, Bejerano G, Pedersen JS, Hinrichs AS, Hou M, Rosenbloom K, Clawson H, Spieth J, Hillier LW, Richards S et al. 2005. “Evolutionarily conserved elements in vertebrate, insect, worm, and yeast genomes.” Genome Research 15(8):1034-1050.
The 1000 Genomes Project Consortium. 2015. “A global reference for human genetic variation” Nature 526(7571):68-74.
Vernot B, Tucci S, Kelso J, Schraiber JG, Wolf AB, Gittelman RM, Dannemann M, Grote S, McCoy RC, Norton H et al. 2016. “Excavating Neandertal and Denisovan DNA from the Genomes of Melanesian Individuals.” Science 352(6282): 235–239.
Wang J, Zhuang J, Iyer S, Lin XY, Greven MC, Kim BH, Moore J, Pierce BG, Dong X, Virgil D et al. 2013. “Factorbook.org: a Wiki-based database for transcription factor-binding data generated by the ENCODE consortium.” Nucleic Acids Res. 41(D1):D171-176. doi: 10.1093/nar/gks1221
Zerbino DR, Wilder SP, Johnson N, Juettemann T, Flicek PR. 2015. “The Ensembl Regulatory Build.” Genome Biol. 16:56. doi: 10.1186/s13059-015-0621-5

## Sheet: legend
column number	column name	description	category	source
1	chr	chromosome	variant information	Prüfer et al. 2014	.
2	start	start position		Prüfer et al. 2014	.
3	end	end position		Prüfer et al. 2014	.
4	variant_type	variant type: SNC,SNP, InDel		Prüfer et al. 2014	.
5	number_annotations	number of overlapping annotations	annotation	this analysis	.
6	annotations	names of overlapping annotations		this analysis	.
7	TFBS	ChIP-seq peaks		Gerstein et al. 2012	.
8	TFBS_motif	most probable binding site using a motif scan on ENCODE ChIP-seq peaks		Wang et al. 2013	.
9	motif_alter	scan for variants that alter a binding motif (MOTIFBR= break motif in ancestral state (gain in humans); MOTIFG= gain motif in ancestral state (lost in humans) using FunSeq2		Fu et al. 2014; Zerbino et al. 2016	.
10	eQTL	eQTLs across 53 tissues		GTEx Consortium et al. 2015	.
11	evoData	human accelerated regions (HARs), human accelerated conserved noncoding regions (CNS), human accelerated DNase hyper sensitivity sites (haDHS)		Lindblad-Toh et al. 2011; Prabhakar et al. 2006; Gittelman et al. 2015	.
12	openChromatin	DNase-seq peaks (HotSpot FDR 0.01) in 77 tissues and cell types (names of cells and tissues)		Roadmap Epigenomics Consortium et al. 2015.	.
13	openChrom_TissueType	DNase-seq peaks (HotSpot FDR 0.01) in 77 tissues and cell types (grouped by tissue type)		Roadmap Epigenomics Consortium et al. 2015.	.
14	H3K4me3_promoter	H3K4me3 ChIP-seq narrowPeaks in 127 tissues and cell types (names of cells and tissues)		Roadmap Epigenomics Consortium et al. 2015.	.
15	H3K4me3_tissueType	H3K4me3 ChIP-seq narrowPeaks in 127 tissues and cell types (grouped by tissue type)		Roadmap Epigenomics Consortium et al. 2015.	.
16	H3K27ac_enhancer	H3K27ac ChIP-seq narrowPeaks in 98 tissues and cell types (names of cells and tissues)		Roadmap Epigenomics Consortium et al. 2015.	.
17	H3K27ac_tissueType	H3K27ac ChIP-seq narrowPeaks in 98 tissues and cell types (grouped by tissue type)		Roadmap Epigenomics Consortium et al. 2015.	.
18	eRNA	transcribed enhancers in 112 tissues and cell types		Andersson et al. 2014	.
19	desert	4 large deserts devoid of Neandertal and Denisova introgression		Vernot et al. 2016	.
20	DE_gene	differently expressed genes between humans and apes across 6 tissues		Brawand et al. 2011	.
21	DE_gene_tissue	tissue where differently expressed gene was detected		Brawand et al. 2011
22	DMR	differently methylated region between modern humans and Neandertals		Gokhman et al. 2014	.
23	Human_MajorAllele	human allele	population genetics	Prüfer et al. 2014	.
24	Ancestral	ancestral allele		Prüfer et al. 2014	.
25	Chimp	chimpanzee allele		Prüfer et al. 2014	.
26	Gorilla	gorilla allele		Prüfer et al. 2014	.
27	Orang	orangutan allele		Prüfer et al. 2014	.
28	Archaics_Genotypes(AltaiNea,Denisova)	archaic hominin alleles		Prüfer et al. 2014	.
29	rsID	reference SNP cluster ID		The 1000 Genomes Project Consortium et al. 2015	.
30	1KGp3_Global_AF	global allele frequency (1000 Genomes phase 3)		The 1000 Genomes Project Consortium et al. 2015	.
31	phyloP_vert	basewise conservation (vertebrates)	conservation	Pollard et al. 2010	.
32	phyloP_mammal	basewise conservation (mammals)		Pollard et al. 2010	.
33	phyloP_primate	basewise conservation (primates)		Pollard et al. 2010	.
34	phastCons_vert	element conservation (vertebrates)		Siepel et al. 2005	.
35	phastCons_mammal	element conservation (mammals)		Siepel et al. 2005	.
36	phastCons_primate	element conservation (primates)		Siepel et al. 2005	.
37	GerpRS	Gerp element score		Davydov et al. 2010	.
38	GerpRS_pVal	Gerp element p-Value		Davydov et al. 2010	.
39	CADD_phred	CADD v1.3 PHRED C-scores	variant scoring systems	Kircher et al. 2014	.
40	fitCons	fitCons multicell score		Gulko et al. 2014	.
41	RegulomeDB	RegulomeDB score (1a-5)		Boyle et al. 2012	.
42	GREAT_regulatoryDomain_genes	gene assigned using GREAT regulatory domains	Gene Info	McLean et al. 2010	.
					.
					.

## Sheet: annotation
variant information				annotation																		population genetics								conservation								scoring systems			gene info
chr	start	end	variant_type	number_annotations	annotations	TFBS	TFBS_motif	motif_alter	eQTL	evoData	openChromatin	openChrom_TissueType	H3K4me3_promoter	H3K4me3_tissueType	H3K27ac_enhancer	H3K27ac_tissueType	eRNA	desert	DE_gene	DE_gene_tissue	DMR	Human_MajorAllele	Ancestral	Chimp	Gorilla	Orang	Archaics_Genotypes(AltaiNea,Denisova)	rsID	1KGp3_Global_AF	phyloP_vert	phyloP_mammal	phyloP_primate	phastCons_vert	phastCons_mammal	phastCons_primate	GerpRS	GerpRS_pVal	CADD_phred	fitCons	RegulomeDB	GREAT_regulatoryDomain_genes
chr1	26376527	26376528	SNP	7	DE_gene,TFBS,TFBS_motif,enhancer,motif_alter,openChrom,promoter	BHLHE40,E2F6,JUND,MAX,USF1,USF2	BHLHE40,MAX,USF	MOTIFBR=USF1	.	.	Fetal_Adrenal_Gland,Fetal_Heart,Fetal_Intestine_Large,Fetal_Intestine_Small,Fetal_Kidney,Foreskin_Fibroblast_Primary_Cells_skin01,Foreskin_Fibroblast_Primary_Cells_skin02,Foreskin_Melanocyte_Primary_Cells_skin01,Placenta,Primary_monocytes_from_peripheral_blood,Psoas_Muscle,Small_Intestine	ADRENAL,BLOOD,GI_INTESTINE,HEART,KIDNEY,MUSCLE,PLACENTA,SKIN	Spleen	SPLEEN	Fetal_Intestine_Large,Fetal_Intestine_Small,Foreskin_Fibroblast_Primary_Cells_skin01,Foreskin_Melanocyte_Primary_Cells_skin03,H1_BMP4_Derived_Trophoblast_Cultured_Cells,K562_Leukemia_Cells,Left_Ventricle,Placenta,Primary_T_CD8+_memory_cells_from_peripheral_blood,Primary_T_helper_memory_cells_from_peripheral_blood_2,Psoas_Muscle,Rectal_Mucosa_Donor_29,Right_Atrium,Right_Ventricle,Skeletal_Muscle_F…	BLOOD,GI_INTESTINE,GI_RECTUM,HEART,MUSCLE,PLACENTA,SKIN,Trophoblast	.	.	SLC30A2	kidney	.	T	C	C	C	C	C/C,C/C	rs536410659	AF=0.000199681	-1.211	-1.204	0.486	0	0	0.001	.	.	4.807	0.056701	.	SLC30A2
chr1	97463466	97463467	SNP	7	DE_gene,TFBS,TFBS_motif,enhancer,haDHS,openChrom,promoter	EP300,GATA2,GATA3,POLR2A,RAD21,REST	REST	.	.	haDHS	Fetal_Adrenal_Gland,Fetal_Heart,H1_BMP4_Derived_Trophoblast_Cultured_Cells	ADRENAL,HEART,Trophoblast	Fetal_Lung,Primary_hematopoietic_stem_cells_G-CSF-mobilized_Male	BLOOD,LUNG	H1_BMP4_Derived_Trophoblast_Cultured_Cells	Trophoblast	.	.	DPYD	cerebellum	.	C	T	T	T	T	T/T,T/T	rs77206960	AF=0.0163738	0.361	0.023	0.478	0.993	0.91	0.951	1819.2	6.52485e-101	20.9	0.053691	4	DPYD,PTBP2
chr1	113498860	113498861	SNP	7	NeanderDenisDesert,TFBS,TFBS_motif,enhancer,motif_alter,openChrom,promoter	ARID3A,BACH1,BCL3,BHLHE40,CCNT2,CEBPD,CHD1,CHD2,CREB1,CTCF,E2F1,E2F4,E2F6,EGR1,ELK1,EP300,FOXP2,GABPA,GTF2B,GTF2F1,HDAC1,HDAC2,HDAC6,HMGN3,HNF4G,IRF1,KDM5B,MAX,MAZ,MXI1,MYBL2,MYC,NFYB,NR3C1,NRF1,PAX5,PHF8,PML,POLR2A,RBBP5,RCOR1,RDBP,RELA,REST,RUNX3,SAP30,SIN3A,SIN3AK20,SP1,STAT1,TAF1,TAL1,TBL1XR1,TBP,TCF12,TCF3,TCF7L2,TRIM28,UBTF,USF2,YY1,ZBTB7A,ZNF143	CTCF,EGR1,NRF1,SP1,UA3,UAK42	MOTIFBR=CCNT2,CTCF,DHS,E2F1,E2F4,E2F6,EGR1,GTF2B,GTF2F1,HMGN3,IRF1,JUND,MAX,MXI1,MYC,NFKB1,NRF1,POU2F2,RDBP,REST,SIN3A,TAF1,TAL1,TBP,TCF12,YY1#ELF1_disc3#113498851#113498864#+#11#0.460827#0.539173,CCNT2,CTCF,DHS,E2F1,E2F4,E2F6,EGR1,ELF1,GTF2B,GTF2F1,HMGN3,IRF1,JUND,MAX,MXI1,MYC,NFKB1,NRF1,POU2F2,RDBP,REST,SIN3A,TAF1,TAL1,TBP,TCF12,USF2,YY1#NRF1_known2#113498860#113498872#-#11#0.003421#0.807012,CC…	.	.	Breast_variant_Human_Mammary_Epithelial_Cells_(vHMEC),Fetal_Adrenal_Gland,Fetal_Brain_Female,Fetal_Brain_Male,Fetal_Heart,Fetal_Intestine_Small,Fetal_Kidney,Fetal_Lung,Fetal_Muscle_Trunk,Fetal_Stomach,Foreskin_Fibroblast_Primary_Cells_skin01,Foreskin_Fibroblast_Primary_Cells_skin02,Foreskin_Melanocyte_Primary_Cells_skin01,Gastric,H1_BMP4_Derived_Mesendoderm_Cultured_Cells,H1_BMP4_Derived_Trophobl…	ADRENAL,BLOOD,BRAIN,BREAST,ESC,GI_INTESTINE,GI_STOMACH,HEART,KIDNEY,LUNG,MUSCLE,Mesendoderm,PANCREAS,PLACENTA,SKIN,STROMAL_CONNECTIVE,Trophoblast,iPSC	A549_EtOH_0.02pct_Lung_Carcinoma_Cell_Line,Adipose_Derived_Mesenchymal_Stem_Cell_Cultured_Cells,Adipose_Nuclei,Bone_Marrow_Derived_Cultured_Mesenchymal_Stem_Cells,Brain_Angular_Gyrus,Brain_Anterior_Caudate,Brain_Cingulate_Gyrus,Brain_Dorsolateral_Prefrontal_Cortex,Brain_Germinal_Matrix,Brain_Hippocampus_Middle,Brain_Inferior_Temporal_Lobe,Brain_Substantia_Nigra,Breast_Myoepithelial_Primary_Cells,…	ADRENAL,BLOOD,BONE,BRAIN,BREAST,CERVIX,ENDODERM,ESC,FAT,GI_COLON,GI_DUODENUM,GI_ESOPHAGUS,GI_INTESTINE,GI_RECTUM,GI_STOMACH,HEART,KIDNEY,LIVER,LUNG,MUSCLE,MUSCLE_LEG,Mesendoderm,OVARY,PANCREAS,PLACENTA,SKIN,SPLEEN,STROMAL_CONNECTIVE,STRONAL_CONNECTIVE,THYMUS,Trophoblast,VASCULAR,iPSC	A549_EtOH_0.02pct_Lung_Carcinoma_Cell_Line,Adipose_Nuclei,Aorta,Bone_Marrow_Derived_Cultured_Mesenchymal_Stem_Cells,Brain_Anterior_Caudate,Brain_Cingulate_Gyrus,Brain_Dorsolateral_Prefrontal_Cortex,Brain_Hippocampus_Middle,Brain_Substantia_Nigra,Colon_Smooth_Muscle,Colonic_Mucosa,Dnd41_TCell_Leukemia_Cell_Line,Esophagus,Fetal_Adrenal_Gland,Fetal_Intestine_Large,Fetal_Intestine_Small,Fetal_Muscle_…	ADRENAL,BLOOD,BONE,BRAIN,BREAST,CERVIX,ENDODERM,ESC,FAT,GI_COLON,GI_ESOPHAGUS,GI_INTESTINE,GI_RECTUM,GI_STOMACH,HEART,LIVER,LUNG,MUSCLE,MUSCLE_LEG,OVARY,PLACENTA,SKIN,SPLEEN,STROMAL_CONNECTIVE,STRONAL_CONNECTIVE,THYMUS,VASCULAR,iPSC	.	NeanderDenisDesert	.		.	G	C	C	C	C	C/C,C/C	rs60953496	AF=0.0105831	0.589	0.418	-0.709	0.397	0.281	0.42	108	2.7708e-11	10.62	0	4	SLC16A1
chr15	68909514	68909515	SNP	7	DE_gene,TFBS,TFBS_motif,enhancer,motif_alter,openChrom,promoter	FOS	AP1	MOTIFBR=DHS,FOS#SPI1_disc3#68909509#68909523#+#7#0.000000#0.175000,DHS,FOS#BATF_disc1#68909515#68909526#+#1#0.119205#0.205298	.	.	Foreskin_Fibroblast_Primary_Cells_skin01,Foreskin_Fibroblast_Primary_Cells_skin02,Foreskin_Melanocyte_Primary_Cells_skin01,H1_Derived_Mesenchymal_Stem_Cells,IMR90_fetal_lung_fibroblasts_Cell_Line,Ovary,Psoas_Muscle	LUNG,MUSCLE,OVARY,SKIN,STROMAL_CONNECTIVE	Spleen	SPLEEN	Brain_Angular_Gyrus,Brain_Anterior_Caudate,Brain_Cingulate_Gyrus,Brain_Dorsolateral_Prefrontal_Cortex,Brain_Hippocampus_Middle,Brain_Inferior_Temporal_Lobe,Brain_Substantia_Nigra,Ovary	BRAIN,OVARY	.	.	CORO2B	testis	.	T	C	C	C	C	C/C,C/C	rs55725109	AF=0.0407348	-0.841	-0.835	-0.15	0	0	0	.	.	1.434	0.119485	3a	ANP32A,CORO2B
chr15	68909519	68909520	SNP	7	DE_gene,TFBS,TFBS_motif,enhancer,motif_alter,openChrom,promoter	FOS	AP1	MOTIFBR=DHS,FOS#HMGN3_disc1#68909516#68909526#-#6#0.000000#0.012987,DHS,FOS#AP1_known6#68909516#68909529#+#5#0.042553#0.170213,DHS,FOS#BCL_disc2#68909517#68909527#-#7#0.000000#0.034286,DHS,FOS#MYC_disc3#68909517#68909527#-#7#0.000000#0.043011,DHS,FOS#RXRA_disc3#68909517#68909527#+#4#0.033333#0.222222,DHS,FOS#TFAP2_disc1#68909517#68909527#+#4#0.000000#0.092896,DHS,FOS#BACH2_1#68909517#68909528#+#4…	.	.	Foreskin_Fibroblast_Primary_Cells_skin01,Foreskin_Fibroblast_Primary_Cells_skin02,Foreskin_Melanocyte_Primary_Cells_skin01,H1_Derived_Mesenchymal_Stem_Cells,IMR90_fetal_lung_fibroblasts_Cell_Line,Ovary,Psoas_Muscle	LUNG,MUSCLE,OVARY,SKIN,STROMAL_CONNECTIVE	Spleen	SPLEEN	Brain_Angular_Gyrus,Brain_Anterior_Caudate,Brain_Cingulate_Gyrus,Brain_Dorsolateral_Prefrontal_Cortex,Brain_Hippocampus_Middle,Brain_Inferior_Temporal_Lobe,Brain_Substantia_Nigra,Ovary	BRAIN,OVARY	.	.	CORO2B	testis	.	T	C	C	C	C	C/C,C/C	rs56327959	AF=0.0407348	-0.049	-0.065	0.645	0	0	0	.	.	2.98	0.119485	2a	ANP32A,CORO2B
chr18	72582243	72582244	SNC	7	CNS,TFBS,TFBS_motif,enhancer,motif_alter,openChrom,promoter	ATF2,BCL11A,FOS,NFATC1	UAK28	MOTIFBR=EBF1,FOS#IRF_known7#72582239#72582254#+#6#0.038462#0.923077	.	CNS	Fetal_Brain_Male	BRAIN	Sigmoid_Colon	GI_COLON	Brain_Anterior_Caudate,Foreskin_Melanocyte_Primary_Cells_skin03,GM12878_Lymphoblastoid_Cells,HUES48_Cells,HUES64_Cells,Mesenchymal_Stem_Cell_Derived_Chondrocyte_Cultured_Cells	BLOOD,BRAIN,ESC,SKIN,STROMAL_CONNECTIVE	.	.	.		.	T	A	A	A	A	A/A,A/A	.	0	2.39	2.028	0.478	1	0.997	0.966	518.8	3.96598e-56	19.53	0.108992	.	ZADH2,ZNF407
chr7	55614497	55614498	SNP	7	TFBS,eQTL,eRNA,enhancer,motif_alter,openChrom,promoter	FOS,FOSL2,POLR2A,RELA,SMARCC1	.	MOTIFBR=DHS,FOS#RXRA_known7#55614490#55614505#+#9#0.312862#0.604867,DHS,FOS#HNF4_known9#55614492#55614506#+#7#0.172414#0.793103	Nerve_Tibial	.	iPS_DF_19.11_Cells	iPSC	A549_EtOH_0.02pct_Lung_Carcinoma_Cell_Line,Foreskin_Fibroblast_Primary_Cells_skin01,Foreskin_Fibroblast_Primary_Cells_skin02,GM12878_Lymphoblastoid_Cells,HeLa-S3_Cervical_Carcinoma_Cell_Line,Mesenchymal_Stem_Cell_Derived_Chondrocyte_Cultured_Cells,Muscle_Satellite_Cultured_Cells,NH-A_Astrocytes_Primary_Cells,Primary_T_helper_17_cells_PMA-I_stimulated,Primary_hematopoietic_stem_cells_G-CSF-mobiliz…	BLOOD,BRAIN,CERVIX,LUNG,MUSCLE,SKIN,STROMAL_CONNECTIVE	A549_EtOH_0.02pct_Lung_Carcinoma_Cell_Line,Bone_Marrow_Derived_Cultured_Mesenchymal_Stem_Cells,Brain_Angular_Gyrus,Dnd41_TCell_Leukemia_Cell_Line,Foreskin_Fibroblast_Primary_Cells_skin01,Foreskin_Fibroblast_Primary_Cells_skin02,Foreskin_Keratinocyte_Primary_Cells_skin03,GM12878_Lymphoblastoid_Cells,H1_Derived_Mesenchymal_Stem_Cells,HMEC_Mammary_Epithelial_Primary_Cells,HSMM_Skeletal_Muscle_Myobla…	BLOOD,BONE,BRAIN,BREAST,CERVIX,GI_COLON,HEART,LIVER,LUNG,MUSCLE,PANCREAS,SKIN,STROMAL_CONNECTIVE,STRONAL_CONNECTIVE,VASCULAR	basophil,dendritic_cell,hepatocyte,monocyte	.	.		.	A	G	G	G	G	G/G,G/G	rs148357530	AF=0.00519169	-0.828	-0.911	-0.743	0	0	0	.	.	1.262	0.101703	.	LANCL2,VOPP1
chr1	9844667	9844668	SNP	6	DE_gene,TFBS,TFBS_motif,enhancer,motif_alter,promoter	CTCF,FOXM1,MAZ,MYC,RCOR1,RFX5,SMC3,YY1,ZNF143	UAK51	MOTIFBR=CTCF,SMC3,YY1#ARID5A_1#9844659#9844673#+#10#0.123119#0.184316	.	.	.	.	GM12878_Lymphoblastoid_Cells	BLOOD	Dnd41_TCell_Leukemia_Cell_Line,Foreskin_Keratinocyte_Primary_Cells_skin03,GM12878_Lymphoblastoid_Cells,NHEK-Epidermal_Keratinocyte_Primary_Cells	BLOOD,SKIN	.	.	CLSTN1	cerebellum	.	G	T	T	T	T	T/T,T/T	rs145175318	AF=0.0081869	-0.145	-0.181	0.455	0	0	0.007	.	.	1.485	0.108992	.	CLSTN1,PIK3CD
chr1	113431377	113431378	SNC	6	NeanderDenisDesert,TFBS,TFBS_motif,enhancer,openChrom,promoter	BHLHE40,GATA2,TAL1,TEAD4,YY1	SP1	.	.	.	Fetal_Kidney	KIDNEY	iPS_DF_19.11_Cells	iPSC	K562_Leukemia_Cells,Primary_hematopoietic_stem_cells_G-CSF-mobilized_Female,iPS_DF_19.11_Cells	BLOOD,iPSC	.	NeanderDenisDesert	.		.	A	G	G	G	G	G/G,G/G	.	0	0.237	0.251	-0.301	0	0	0.001	.	.	1.034	0.053691	.	FAM19A3,SLC16A1
chr1	113447694	113447695	SNP	6	NeanderDenisDesert,TFBS,TFBS_motif,enhancer,openChrom,promoter	CBX3,EGR1,FOS,HDAC2,MAZ,RCOR1,REST	UAK42	.	.	.	Breast_variant_Human_Mammary_Epithelial_Cells_(vHMEC),Fetal_Stomach,Foreskin_Keratinocyte_Primary_Cells_skin02,Gastric,H1_BMP4_Derived_Mesendoderm_Cultured_Cells,H1_BMP4_Derived_Trophoblast_Cultured_Cells,H1_Cells,H9_Cells,Placenta,iPS_DF_19.11_Cells,iPS_DF_6.9_Cells	BREAST,ESC,GI_STOMACH,Mesendoderm,PLACENTA,SKIN,Trophoblast,iPSC	Foreskin_Keratinocyte_Primary_Cells_skin03,K562_Leukemia_Cells,NHEK-Epidermal_Keratinocyte_Primary_Cells,Rectal_Mucosa_Donor_31	BLOOD,GI_RECTUM,SKIN	Adipose_Nuclei,Brain_Cingulate_Gyrus,Brain_Dorsolateral_Prefrontal_Cortex,Brain_Hippocampus_Middle,Brain_Inferior_Temporal_Lobe,Brain_Substantia_Nigra,Colonic_Mucosa,Fetal_Intestine_Large,Fetal_Intestine_Small,Fetal_Stomach,Foreskin_Fibroblast_Primary_Cells_skin01,Foreskin_Keratinocyte_Primary_Cells_skin03,Foreskin_Melanocyte_Primary_Cells_skin03,Gastric,H1_BMP4_Derived_Mesendoderm_Cultured_Cells…	BLOOD,BONE,BRAIN,BREAST,CERVIX,ENDODERM,ESC,FAT,GI_COLON,GI_INTESTINE,GI_RECTUM,GI_STOMACH,HEART,LUNG,MUSCLE,Mesendoderm,SKIN,Trophoblast	.	NeanderDenisDesert	.		.	A	G	G	G	G	G/G,G/G	rs143992612	AF=0.00159744	0.673	0.679	-0.265	0.001	0.001	0.048	.	.	3.422	0.14245	.	FAM19A3,SLC16A1
chr1	169843608	169843609	SNP	6	TFBS,eQTL,enhancer,motif_alter,openChrom,promoter	FOS,POLR2A	.	MOTIFBR=DHS#OBOX1_1#169843597#169843614#+#13#0.052601#0.711018,DHS#HAND1_2#169843609#169843619#-#10#0.137931#0.551724	Adipose_Subcutaneous,Adipose_Visceral,Adrenal_Gland,Artery_Aorta,Artery_Coronary,Artery_Tibial,Brain_Anterior_cingulate_cortex,Brain_Caudate_basal_ganglia,Brain_Cerebellar_Hemisphere,Brain_Cerebellum,Brain_Frontal_Cortex,Brain_Hippocampus,Brain_Hypothalamus,Brain_Nucleus_accumbens_basal_ganglia,Brain_Putamen_basal_ganglia,Breast_Mammary_Tissue,Colon_Sigmoid,Colon_Transverse,Esophagus_Gastroesopha…	.	Breast_variant_Human_Mammary_Epithelial_Cells_(vHMEC),Foreskin_Fibroblast_Primary_Cells_skin01,Foreskin_Fibroblast_Primary_Cells_skin02,Foreskin_Keratinocyte_Primary_Cells_skin02,Gastric,H1_BMP4_Derived_Trophoblast_Cultured_Cells,H1_Derived_Mesenchymal_Stem_Cells,IMR90_fetal_lung_fibroblasts_Cell_Line	BREAST,GI_STOMACH,LUNG,SKIN,STROMAL_CONNECTIVE,Trophoblast	Duodenum_Smooth_Muscle,Foreskin_Fibroblast_Primary_Cells_skin02	GI_DUODENUM,SKIN	Bone_Marrow_Derived_Cultured_Mesenchymal_Stem_Cells,Brain_Inferior_Temporal_Lobe,H1_BMP4_Derived_Trophoblast_Cultured_Cells,H1_Derived_Mesenchymal_Stem_Cells,NH-A_Astrocytes_Primary_Cells,NHEK-Epidermal_Keratinocyte_Primary_Cells,Osteoblast_Primary_Cells,Rectal_Smooth_Muscle,hESC_Derived_CD56+_Mesoderm_Cultured_Cells	BONE,BRAIN,ENDODERM,GI_RECTUM,SKIN,STROMAL_CONNECTIVE,STRONAL_CONNECTIVE,Trophoblast	.	.	.		.	A	G	G	G	G	G/G,G/G	rs12142093	AF=0.0439297	-1.205	-1.356	-0.269	0	0	0	.	.	1.824	0.099367	1f	C1orf156,SCYL3
chr11	102219862	102219863	SNP	6	TFBS,TFBS_motif,eQTL,enhancer,motif_alter,openChrom	FOXA1	HNF4	MOTIFBR=DHS,FOXA1#FOXG1_1#102219850#102219867#-#4#0.000000#1.000000,DHS,FOXA1#FOXA_disc5#102219862#102219871#-#8#0.120000#0.880000	Muscle_Skeletal	.	Fetal_Intestine_Small	GI_INTESTINE	.	.	A549_EtOH_0.02pct_Lung_Carcinoma_Cell_Line,Adipose_Nuclei,Bone_Marrow_Derived_Cultured_Mesenchymal_Stem_Cells,Duodenum_Smooth_Muscle,Fetal_Intestine_Large,Fetal_Intestine_Small,Fetal_Thymus,Foreskin_Fibroblast_Primary_Cells_skin01,Foreskin_Keratinocyte_Primary_Cells_skin03,GM12878_Lymphoblastoid_Cells,HMEC_Mammary_Epithelial_Primary_Cells,HUVEC_Umbilical_Vein_Endothelial_Primary_Cells,Liver,Mesen…	BLOOD,BONE,BREAST,FAT,GI_DUODENUM,GI_INTESTINE,GI_RECTUM,LIVER,LUNG,SKIN,STROMAL_CONNECTIVE,STRONAL_CONNECTIVE,THYMUS,VASCULAR	.	.	.		.	T	G	G	G	G	G/G,G/G	rs11604189	AF=0.0295527	-0.397	-0.28	0.651	0	0	0.033	82.4	5.42226e-07	4.244	0.209283	4	BIRC2,TMEM123
chr16	46916593	46916594	SNP	6	TFBS,TFBS_motif,enhancer,motif_alter,openChrom,promoter	ARID3A,ATF3,BHLHE40,EP300,FOSL2,FOXA1,FOXA2,GATA2,HDAC2,HNF4A,HNF4G,JUND,MAX,MAZ,MXI1,MYBL2,MYC,NFIC,POLR2A,RXRA,SIN3AK20,SMC3,SP1,TCF12	MAX,MYC	MOTIFBR=ATF3,DHS,EP300,FOSL2,FOXA1,FOXA2,GATA2,HDAC2,HNF4A,HNF4G,JUND,RXRA,SIN3A,SP1,TCF12,TCF7L2#CACD_1#46916588#46916604#+#7#0.142857#0.285714	.	.	Fetal_Adrenal_Gland,H1_BMP4_Derived_Trophoblast_Cultured_Cells,Pancreas	ADRENAL,PANCREAS,Trophoblast	Brain_Cingulate_Gyrus,HepG2_Hepatocellular_Carcinoma_Cell_Line,iPS-20b_Cells	BRAIN,LIVER,iPSC	Adipose_Nuclei,Brain_Angular_Gyrus,Brain_Anterior_Caudate,Brain_Cingulate_Gyrus,Brain_Hippocampus_Middle,Brain_Inferior_Temporal_Lobe,Brain_Substantia_Nigra,Gastric,HepG2_Hepatocellular_Carcinoma_Cell_Line,Liver,Pancreas,Placenta,hESC_Derived_CD56+_Ectoderm_Cultured_Cells	BRAIN,ENDODERM,FAT,GI_STOMACH,LIVER,PANCREAS,PLACENTA	.	.	.		.	A	C	C	NA	C	C/C,C/C	rs4967594	AF=0.982428,0.00499201	-0.596	-0.592	-1.611	0	0	0.003	.	.	.	0.077194	2b	GPT2
chr16	75018460	75018461	SNP	6	DE_gene,TFBS,enhancer,motif_alter,openChrom,promoter	BACH1,E2F6,HDAC1,MAX,MYC,POLR2A,RBBP5,RUNX3,SIN3AK20,SMARCA4	.	MOTIFG=ZNF354C_1#75018461#75018467#+#1#6.856#6.706	.	.	Fetal_Intestine_Small,Foreskin_Fibroblast_Primary_Cells_skin02,Foreskin_Keratinocyte_Primary_Cells_skin02,H1_Derived_Mesenchymal_Stem_Cells,Pancreas,Primary_B_cells_from_peripheral_blood,Primary_Natural_Killer_cells_from_peripheral_blood,Primary_T_cells_from_cord_blood,Primary_T_cells_from_peripheral_blood,Primary_hematopoietic_stem_cells_G-CSF-mobilized_Female,Primary_hematopoietic_stem_cells_G-…	BLOOD,GI_INTESTINE,PANCREAS,SKIN,STROMAL_CONNECTIVE	A549_EtOH_0.02pct_Lung_Carcinoma_Cell_Line,Adipose_Derived_Mesenchymal_Stem_Cell_Cultured_Cells,Adipose_Nuclei,Aorta,Bone_Marrow_Derived_Cultured_Mesenchymal_Stem_Cells,Brain_Angular_Gyrus,Brain_Anterior_Caudate,Brain_Cingulate_Gyrus,Brain_Dorsolateral_Prefrontal_Cortex,Brain_Germinal_Matrix,Brain_Hippocampus_Middle,Brain_Inferior_Temporal_Lobe,Brain_Substantia_Nigra,Breast_Myoepithelial_Primary_…	ADRENAL,BLOOD,BONE,BRAIN,BREAST,CERVIX,ENDODERM,ESC,FAT,GI_COLON,GI_DUODENUM,GI_ESOPHAGUS,GI_INTESTINE,GI_RECTUM,GI_STOMACH,HEART,KIDNEY,LIVER,LUNG,MUSCLE,MUSCLE_LEG,Mesendoderm,OVARY,PANCREAS,PLACENTA,SKIN,SPLEEN,STROMAL_CONNECTIVE,STRONAL_CONNECTIVE,THYMUS,Trophoblast,VASCULAR,iPSC	A549_EtOH_0.02pct_Lung_Carcinoma_Cell_Line,Adipose_Nuclei,Brain_Angular_Gyrus,Brain_Anterior_Caudate,Brain_Cingulate_Gyrus,Brain_Dorsolateral_Prefrontal_Cortex,Brain_Hippocampus_Middle,Brain_Inferior_Temporal_Lobe,Colon_Smooth_Muscle,Dnd41_TCell_Leukemia_Cell_Line,Duodenum_Smooth_Muscle,Fetal_Adrenal_Gland,Fetal_Intestine_Large,Fetal_Intestine_Small,Fetal_Stomach,Fetal_Thymus,Foreskin_Fibroblast_…	ADRENAL,BLOOD,BONE,BRAIN,BREAST,CERVIX,ENDODERM,ESC,FAT,GI_COLON,GI_DUODENUM,GI_INTESTINE,GI_STOMACH,HEART,LIVER,LUNG,MUSCLE,OVARY,SKIN,SPLEEN,THYMUS,iPSC	.	.	FA2H	testis	.	C	A	A	A	A	A/A,A/A	rs374035238	AF=0.000798722	-0.245	-0.286	0.364	0	0	0.01	.	.	10.12	0.078958	.	FA2H,ZNRF1
chr16	75034758	75034759	SNP	6	DE_gene,TFBS,enhancer,motif_alter,openChrom,promoter	MXI1,MYC,RELA,YY1	.	MOTIFG=KLF12_1#75034758#75034765#+#2#6.809#5.603	.	.	Foreskin_Fibroblast_Primary_Cells_skin02,H1_BMP4_Derived_Trophoblast_Cultured_Cells,Ovary,Pancreas	OVARY,PANCREAS,SKIN,Trophoblast	A549_EtOH_0.02pct_Lung_Carcinoma_Cell_Line,Adipose_Derived_Mesenchymal_Stem_Cell_Cultured_Cells,Adipose_Nuclei,Aorta,Bone_Marrow_Derived_Cultured_Mesenchymal_Stem_Cells,Brain_Angular_Gyrus,Brain_Anterior_Caudate,Brain_Cingulate_Gyrus,Brain_Dorsolateral_Prefrontal_Cortex,Brain_Germinal_Matrix,Brain_Hippocampus_Middle,Brain_Inferior_Temporal_Lobe,Brain_Substantia_Nigra,Breast_Myoepithelial_Primary_…	ADRENAL,BLOOD,BONE,BRAIN,BREAST,CERVIX,ENDODERM,ESC,FAT,GI_COLON,GI_DUODENUM,GI_ESOPHAGUS,GI_INTESTINE,GI_RECTUM,GI_STOMACH,HEART,KIDNEY,LIVER,LUNG,MUSCLE,MUSCLE_LEG,Mesendoderm,OVARY,PANCREAS,PLACENTA,SKIN,STROMAL_CONNECTIVE,STRONAL_CONNECTIVE,THYMUS,Trophoblast,VASCULAR,iPSC	Adipose_Nuclei,Aorta,Brain_Angular_Gyrus,Brain_Anterior_Caudate,Brain_Cingulate_Gyrus,Brain_Dorsolateral_Prefrontal_Cortex,Brain_Hippocampus_Middle,Brain_Inferior_Temporal_Lobe,Colon_Smooth_Muscle,Colonic_Mucosa,Dnd41_TCell_Leukemia_Cell_Line,Fetal_Adrenal_Gland,Fetal_Muscle_Leg,Fetal_Thymus,H1_Derived_Mesenchymal_Stem_Cells,HMEC_Mammary_Epithelial_Primary_Cells,HSMM_cell_derived_Skeletal_Muscle_…	ADRENAL,BLOOD,BONE,BRAIN,BREAST,FAT,GI_COLON,GI_RECTUM,GI_STOMACH,HEART,LIVER,LUNG,MUSCLE,MUSCLE_LEG,PLACENTA,SKIN,STROMAL_CONNECTIVE,THYMUS,VASCULAR	.	.	LDHD	kidney	.	C	A	A	A	A	A/A,A/A	rs376990354	AF=0.00119808	0.63	0.447	-0.464	0.161	0.425	0.061	3607.1	0	1.881	0.163419	.	LDHD,ZNRF1
chr16	75059885	75059886	SNP	6	DE_gene,TFBS,enhancer,motif_alter,openChrom,promoter	CHD1	.	MOTIFBR=DHS,MAX#MYB_6#75059874#75059891#+#13#0.019522#0.113036,DHS,MAX#MYBL1_1#75059874#75059891#+#13#0.006957#0.079005,DHS,MAX#MYBL1_4#75059877#75059888#+#10#0.049783#0.179475,DHS,MAX#MYBL2_3#75059877#75059888#+#10#0.038260#0.177737	.	.	Fetal_Lung,Fetal_Muscle_Leg,Foreskin_Fibroblast_Primary_Cells_skin01,IMR90_fetal_lung_fibroblasts_Cell_Line,Ovary,Primary_hematopoietic_stem_cells_G-CSF-mobilized_Female	BLOOD,LUNG,MUSCLE_LEG,OVARY,SKIN	Fetal_Lung,Mesenchymal_Stem_Cell_Derived_Adipocyte_Cultured_Cells,Primary_hematopoietic_stem_cells_G-CSF-mobilized_Male	BLOOD,FAT,LUNG	A549_EtOH_0.02pct_Lung_Carcinoma_Cell_Line,Adipose_Nuclei,Aorta,Bone_Marrow_Derived_Cultured_Mesenchymal_Stem_Cells,Colon_Smooth_Muscle,Colonic_Mucosa,Duodenum_Smooth_Muscle,Esophagus,Fetal_Adrenal_Gland,Fetal_Muscle_Leg,Fetal_Muscle_Trunk,Fetal_Stomach,Fetal_Thymus,Foreskin_Fibroblast_Primary_Cells_skin01,Foreskin_Fibroblast_Primary_Cells_skin02,Gastric,HSMM_Skeletal_Muscle_Myoblasts_Cells,HUES4…	ADRENAL,BLOOD,BONE,BRAIN,ESC,FAT,GI_COLON,GI_DUODENUM,GI_ESOPHAGUS,GI_INTESTINE,GI_RECTUM,GI_STOMACH,HEART,LIVER,LUNG,MUSCLE,MUSCLE_LEG,OVARY,PLACENTA,SKIN,STROMAL_CONNECTIVE,STRONAL_CONNECTIVE,THYMUS,VASCULAR	.	.	LDHD	kidney	.	T	C	C	C	C	C/C,C/C	rs28374443	AF=0.0577077	0.116	0.005	0.645	0	0	0.063	.	.	4.435	0.101703	3a	LDHD,ZNRF1
chr17	45277766	45277767	SNP	6	DE_gene,TFBS,eRNA,enhancer,openChrom,promoter	POLR2A	.	.	.	.	Primary_B_cells_from_peripheral_blood	BLOOD	Monocytes-CD14+_RO01746_Primary_Cells,Primary_B_cells_from_cord_blood,Primary_B_cells_from_peripheral_blood,Primary_T_cells_from_cord_blood,Primary_hematopoietic_stem_cells,Primary_hematopoietic_stem_cells_short_term_culture,Primary_monocytes_from_peripheral_blood,Primary_neutrophils_from_peripheral_blood,Rectal_Mucosa_Donor_29	BLOOD,GI_RECTUM	Adipose_Nuclei,Brain_Anterior_Caudate,Brain_Dorsolateral_Prefrontal_Cortex,Brain_Hippocampus_Middle,Brain_Substantia_Nigra,Colonic_Mucosa,Fetal_Muscle_Leg,Fetal_Thymus,GM12878_Lymphoblastoid_Cells,Lung,Monocytes-CD14+_RO01746_Primary_Cells,Primary_B_cells_from_peripheral_blood,Primary_Natural_Killer_cells_from_peripheral_blood,Primary_T_cells_from_peripheral_blood,Primary_T_helper_cells_PMA-I_sti…	BLOOD,BRAIN,FAT,GI_COLON,GI_INTESTINE,GI_RECTUM,LUNG,MUSCLE,MUSCLE_LEG,SPLEEN,THYMUS	dendritic_cell	.	CDC27	testis	.	A	G	G	G	G	G/G,G/G	rs61255112	AF=0.0239617	-0.531	-0.54	-0.264	0	0	0.008	.	.	2.031	0.108992	5	CDC27,MYL4
chr17	45277811	45277812	SNP	6	DE_gene,TFBS,eRNA,enhancer,openChrom,promoter	POLR2A	.	.	.	.	Primary_B_cells_from_peripheral_blood	BLOOD	Monocytes-CD14+_RO01746_Primary_Cells,Primary_B_cells_from_cord_blood,Primary_B_cells_from_peripheral_blood,Primary_hematopoietic_stem_cells,Primary_hematopoietic_stem_cells_short_term_culture,Primary_monocytes_from_peripheral_blood,Primary_neutrophils_from_peripheral_blood,Rectal_Mucosa_Donor_29	BLOOD,GI_RECTUM	Adipose_Nuclei,Brain_Anterior_Caudate,Brain_Dorsolateral_Prefrontal_Cortex,Brain_Hippocampus_Middle,Brain_Substantia_Nigra,Colonic_Mucosa,Fetal_Muscle_Leg,Fetal_Thymus,GM12878_Lymphoblastoid_Cells,Lung,Monocytes-CD14+_RO01746_Primary_Cells,Primary_B_cells_from_peripheral_blood,Primary_Natural_Killer_cells_from_peripheral_blood,Primary_T_cells_from_peripheral_blood,Primary_T_helper_cells_PMA-I_sti…	BLOOD,BRAIN,FAT,GI_COLON,GI_INTESTINE,GI_RECTUM,LUNG,MUSCLE,MUSCLE_LEG,SPLEEN,THYMUS	dendritic_cell	.	CDC27	testis	.	T	C	C	C	C	C/C,C/C	rs57661742	AF=0.0239617	-0.312	-0.317	-0.262	0	0	0.023	.	.	2.416	0.108992	5	CDC27,MYL4
chr17	74734652	74734653	SNP	6	TFBS,TFBS_motif,enhancer,motif_alter,openChrom,promoter	CHD1,EP300,SAP30,SIN3AK20,SPI1	PU1	MOTIFBR=DHS,SPI1#STAT_known14#74734651#74734659#+#3#0.050000#0.090000	.	.	Primary_B_cells_from_peripheral_blood	BLOOD	A549_EtOH_0.02pct_Lung_Carcinoma_Cell_Line,Adipose_Derived_Mesenchymal_Stem_Cell_Cultured_Cells,Adipose_Nuclei,Aorta,Bone_Marrow_Derived_Cultured_Mesenchymal_Stem_Cells,Brain_Angular_Gyrus,Brain_Anterior_Caudate,Brain_Cingulate_Gyrus,Brain_Dorsolateral_Prefrontal_Cortex,Brain_Germinal_Matrix,Brain_Hippocampus_Middle,Brain_Inferior_Temporal_Lobe,Brain_Substantia_Nigra,Breast_Myoepithelial_Primary_…	ADRENAL,BLOOD,BONE,BRAIN,BREAST,CERVIX,ENDODERM,ESC,FAT,GI_COLON,GI_DUODENUM,GI_INTESTINE,GI_RECTUM,GI_STOMACH,HEART,KIDNEY,LIVER,LUNG,MUSCLE,MUSCLE_LEG,Mesendoderm,OVARY,PANCREAS,PLACENTA,SKIN,STROMAL_CONNECTIVE,STRONAL_CONNECTIVE,THYMUS,VASCULAR,iPSC	A549_EtOH_0.02pct_Lung_Carcinoma_Cell_Line,Adipose_Nuclei,Bone_Marrow_Derived_Cultured_Mesenchymal_Stem_Cells,Brain_Angular_Gyrus,Brain_Anterior_Caudate,Brain_Cingulate_Gyrus,Brain_Dorsolateral_Prefrontal_Cortex,Brain_Hippocampus_Middle,Brain_Inferior_Temporal_Lobe,Brain_Substantia_Nigra,Colon_Smooth_Muscle,Colonic_Mucosa,Dnd41_TCell_Leukemia_Cell_Line,Duodenum_Smooth_Muscle,Fetal_Adrenal_Gland,F…	ADRENAL,BLOOD,BONE,BRAIN,BREAST,CERVIX,ENDODERM,ESC,FAT,GI_COLON,GI_DUODENUM,GI_INTESTINE,GI_RECTUM,GI_STOMACH,HEART,LIVER,LUNG,MUSCLE,MUSCLE_LEG,PLACENTA,SKIN,SPLEEN,STROMAL_CONNECTIVE,STRONAL_CONNECTIVE,THYMUS,VASCULAR	.	.	.		.	A	G	G	G	G	G/G,G/G	rs73996696	AF=0.0359425	-0.917	-0.922	-0.353	0	0	0.001	.	.	5.247	0.093295	2a	MFSD11,SFRS2
chr18	9961026	9961027	SNC	6	TFBS,TFBS_motif,enhancer,motif_alter,openChrom,promoter	EBF1	EBF1	MOTIFBR=DHS,EBF1#EBF1_known4#9961013#9961027#-#0#0.052461#0.161917	.	.	H9_Cells	ESC	Mesenchymal_Stem_Cell_Derived_Adipocyte_Cultured_Cells	FAT	Brain_Anterior_Caudate,Brain_Substantia_Nigra,Foreskin_Fibroblast_Primary_Cells_skin02,HSMM_cell_derived_Skeletal_Muscle_Myotubes_Cells,HUES48_Cells,Mesenchymal_Stem_Cell_Derived_Chondrocyte_Cultured_Cells,Ovary,hESC_Derived_CD56+_Ectoderm_Cultured_Cells,hESC_Derived_CD56+_Mesoderm_Cultured_Cells	BRAIN,ENDODERM,ESC,MUSCLE,OVARY,SKIN,STROMAL_CONNECTIVE	.	.	.		.	T	C	C	C	C	C/C,C/C	.	0	-0.645	-0.637	-1.231	0	0	0.001	.	.	0.376	0	.	APCDD1,VAPA
chr2	63155415	63155416	SNP	6	TFBS,TFBS_motif,eQTL,enhancer,motif_alter,openChrom	BCL11A,CHD1,CHD2,EBF1,EP300,MAX,MXI1,NR2F2,POU2F2,RUNX3,STAT3,TAL1	GATA1-ext	MOTIFBR=DHS,GATA2,TAL1#TAL1_disc1#63155399#63155418#+#18#0.008000#0.096000,DHS,GATA2,TAL1#GATA_known14#63155400#63155418#-#2#0.150918#0.176751	Whole_Blood	.	H1_BMP4_Derived_Mesendoderm_Cultured_Cells	Mesendoderm	.	.	Adipose_Nuclei,H1_Derived_Neuronal_Progenitor_Cultured_Cells,K562_Leukemia_Cells	BLOOD,BRAIN,FAT	.	.	.		.	C	G	G	G	G	G/G,G/G	rs78770123	AF=0.0611022	-0.434	-0.474	0.307	0.001	0.001	0.006	.	.	1.916	0.074388	2a	EHBP1,OTX1
chr2	71679939	71679940	SNC	6	TFBS,TFBS_motif,enhancer,motif_alter,openChrom,promoter	ATF3,CEBPB,CHD2,CTCF,E2F6,EP300,FOS,FOSL1,GABPA,GATA2,HDAC2,JUND,MAFK,MAX,MAZ,MEF2A,MYC,NR2F2,POLR2A,RAD21,RCOR1,SIN3A,SMARCC1,SMC3,STAT3,TEAD4,TFAP2A,TFAP2C,TRIM28,UBTF,ZBTB7A,ZNF143,ZNF217	AP1,NFE2	MOTIFBR=CEBPB,CTCF,CTCFL,DHS,E2F6,FOS,FOSL1,GABPA,GATA2,HDAC2,JUND,MAFK,MAX,RAD21,SMARCC1,SMC3,STAT3,TAF1,TFAP2A,TFAP2C,ZBTB7A#BACH2_1#71679940#71679951#+#1#0.090909#0.318182	.	.	Breast_variant_Human_Mammary_Epithelial_Cells_(vHMEC),Fetal_Heart,Fetal_Muscle_Leg,Fetal_Muscle_Trunk,Foreskin_Fibroblast_Primary_Cells_skin01,Foreskin_Fibroblast_Primary_Cells_skin02,Foreskin_Keratinocyte_Primary_Cells_skin02,H1_BMP4_Derived_Mesendoderm_Cultured_Cells,H1_BMP4_Derived_Trophoblast_Cultured_Cells,H1_Cells,H1_Derived_Mesenchymal_Stem_Cells,IMR90_fetal_lung_fibroblasts_Cell_Line,Plac…	BLOOD,BREAST,ESC,HEART,LUNG,MUSCLE,MUSCLE_LEG,Mesendoderm,PLACENTA,SKIN,STROMAL_CONNECTIVE,Trophoblast,iPSC	Adipose_Derived_Mesenchymal_Stem_Cell_Cultured_Cells,Fetal_Muscle_Trunk,HSMM_Skeletal_Muscle_Myoblasts_Cells,HUES48_Cells,HeLa-S3_Cervical_Carcinoma_Cell_Line,Monocytes-CD14+_RO01746_Primary_Cells,Primary_B_cells_from_cord_blood,Primary_neutrophils_from_peripheral_blood,Rectal_Smooth_Muscle,Skeletal_Muscle_Female,Stomach_Smooth_Muscle	BLOOD,CERVIX,ESC,GI_RECTUM,GI_STOMACH,MUSCLE,STRONAL_CONNECTIVE	Fetal_Muscle_Leg,Fetal_Muscle_Trunk,HSMM_Skeletal_Muscle_Myoblasts_Cells,HSMM_cell_derived_Skeletal_Muscle_Myotubes_Cells,Left_Ventricle,Liver,Monocytes-CD14+_RO01746_Primary_Cells,Placenta,Primary_monocytes_from_peripheral_blood,Right_Atrium,Skeletal_Muscle_Female,Spleen	BLOOD,HEART,LIVER,MUSCLE,MUSCLE_LEG,PLACENTA,SPLEEN	.	.	.		.	G	A	A	A	A	A/A,A/A	.	0	1.887	1.821	0.398	1	1	0.951	158.3	3.07323e-12	16.77	0.118714	.	DYSF,ZNF638
chr2	95772023	95772024	SNC	6	DE_gene,TFBS,TFBS_motif,enhancer,motif_alter,openChrom	CEBPB,FOS,STAT3	CEBPB	MOTIFBR=DHS,STAT3#CEBPB_known7#95772017#95772029#+#8#0.056180#0.235955	.	.	Fetal_Adrenal_Gland,Psoas_Muscle	ADRENAL,MUSCLE	.	.	Fetal_Adrenal_Gland	ADRENAL	.	.	MAL	kidney	.	C	T	T	T	T	T/T,T/T	.	0	0.573	0.294	0.375	0	0	0.015	.	.	4.585	0.099367	.	MAL,MRPS5
chr20	33291675	33291676	SNC	6	TFBS,TFBS_motif,enhancer,motif_alter,openChrom,promoter	CTCF,E2F1,HDAC2,MBD4,NFIC,PPARGC1A,RCOR1,SIN3A,SMC3	CTCF	MOTIFBR=DHS#MYC_disc10#33291671#33291682#+#6#0.256970#0.310303,DHS#WT1_1#33291674#33291683#-#7#0.272727#0.409091,DHS#STAT_disc7#33291674#33291687#+#3#0.000000#0.834586,MOTIFG=GTF2I_1#33291670#33291679#+#7#9.806#5.412	.	.	Fetal_Heart,Fetal_Thymus,H1_Cells,Ovary,Primary_B_cells_from_peripheral_blood,Primary_T_cells_from_peripheral_blood	BLOOD,ESC,HEART,OVARY,THYMUS	A549_EtOH_0.02pct_Lung_Carcinoma_Cell_Line,Adipose_Derived_Mesenchymal_Stem_Cell_Cultured_Cells,Adipose_Nuclei,Aorta,Bone_Marrow_Derived_Cultured_Mesenchymal_Stem_Cells,Brain_Angular_Gyrus,Brain_Anterior_Caudate,Brain_Cingulate_Gyrus,Brain_Dorsolateral_Prefrontal_Cortex,Brain_Germinal_Matrix,Brain_Hippocampus_Middle,Brain_Inferior_Temporal_Lobe,Brain_Substantia_Nigra,Breast_Myoepithelial_Primary_…	ADRENAL,BLOOD,BONE,BRAIN,BREAST,CERVIX,ENDODERM,ESC,FAT,GI_COLON,GI_DUODENUM,GI_ESOPHAGUS,GI_INTESTINE,GI_RECTUM,GI_STOMACH,HEART,KIDNEY,LIVER,LUNG,MUSCLE,MUSCLE_LEG,Mesendoderm,OVARY,PANCREAS,PLACENTA,SKIN,SPLEEN,STROMAL_CONNECTIVE,STRONAL_CONNECTIVE,THYMUS,Trophoblast,VASCULAR,iPSC	A549_EtOH_0.02pct_Lung_Carcinoma_Cell_Line,Adipose_Nuclei,Aorta,Bone_Marrow_Derived_Cultured_Mesenchymal_Stem_Cells,Brain_Angular_Gyrus,Brain_Anterior_Caudate,Brain_Cingulate_Gyrus,Brain_Dorsolateral_Prefrontal_Cortex,Brain_Hippocampus_Middle,Brain_Inferior_Temporal_Lobe,Brain_Substantia_Nigra,Colon_Smooth_Muscle,Colonic_Mucosa,Dnd41_TCell_Leukemia_Cell_Line,Duodenum_Smooth_Muscle,Esophagus,Fetal…	ADRENAL,BLOOD,BONE,BRAIN,BREAST,CERVIX,ENDODERM,ESC,FAT,GI_COLON,GI_DUODENUM,GI_ESOPHAGUS,GI_INTESTINE,GI_RECTUM,GI_STOMACH,HEART,LIVER,LUNG,MUSCLE,MUSCLE_LEG,OVARY,PANCREAS,PLACENTA,SKIN,SPLEEN,STROMAL_CONNECTIVE,STRONAL_CONNECTIVE,Trophoblast,VASCULAR	.	.	.		.	G	A	A	A	A	A/A,A/A	.	0	-0.732	-0.774	0.417	0	0	0.002	.	.	7.109	0	.	TP53INP2
chr20	33385236	33385237	SNC	6	TFBS,TFBS_motif,enhancer,motif_alter,openChrom,promoter	EP300,MAFF,MAFK,MAX,MYC,TEAD4	v-Maf	MOTIFG=TCF7L2_known2#33385236#33385242#+#2#7.511#3.117	.	.	Fetal_Muscle_Trunk	MUSCLE	K562_Leukemia_Cells	BLOOD	Brain_Hippocampus_Middle,Dnd41_TCell_Leukemia_Cell_Line,HSMM_cell_derived_Skeletal_Muscle_Myotubes_Cells,K562_Leukemia_Cells,Right_Ventricle	BLOOD,BRAIN,HEART,MUSCLE	.	.	.		.	T	C	C	C	C	C/C,C/C	.	0	0.125	0.123	0.124	0.088	0.079	0.08	.	.	1.75	0.048788	.	NCOA6,TP53INP2
chr20	36343562	36343563	SNP	6	DE_gene,TFBS,eRNA,enhancer,openChrom,promoter	CEBPB,FOS,JUN,JUND,STAT3	.	.	.	.	Breast_variant_Human_Mammary_Epithelial_Cells_(vHMEC),Fetal_Intestine_Large,Fetal_Intestine_Small,Foreskin_Fibroblast_Primary_Cells_skin01,Foreskin_Fibroblast_Primary_Cells_skin02,Foreskin_Keratinocyte_Primary_Cells_skin02,Foreskin_Melanocyte_Primary_Cells_skin01,H1_BMP4_Derived_Trophoblast_Cultured_Cells,H1_Derived_Mesenchymal_Stem_Cells,IMR90_fetal_lung_fibroblasts_Cell_Line,Placenta,Primary_he…	BLOOD,BREAST,GI_INTESTINE,LUNG,MUSCLE,PLACENTA,SKIN,STROMAL_CONNECTIVE,Trophoblast	Mesenchymal_Stem_Cell_Derived_Chondrocyte_Cultured_Cells,Monocytes-CD14+_RO01746_Primary_Cells,Osteoblast_Primary_Cells,Primary_hematopoietic_stem_cells_G-CSF-mobilized_Female,Primary_hematopoietic_stem_cells_G-CSF-mobilized_Male,Primary_neutrophils_from_peripheral_blood	BLOOD,BONE,STROMAL_CONNECTIVE	Bone_Marrow_Derived_Cultured_Mesenchymal_Stem_Cells,Liver,Mesenchymal_Stem_Cell_Derived_Chondrocyte_Cultured_Cells,Monocytes-CD14+_RO01746_Primary_Cells,Osteoblast_Primary_Cells,Placenta,Primary_hematopoietic_stem_cells_G-CSF-mobilized_Female,Primary_monocytes_from_peripheral_blood	BLOOD,BONE,LIVER,PLACENTA,STROMAL_CONNECTIVE,STRONAL_CONNECTIVE	basophil,mast_cell,monocyte	.	CTNNBL1	liver	.	T	C	C	C	C	C/C,C/C	rs6012894	AF=0.00758786	-0.289	-0.361	-0.269	0	0	0.044	.	.	2.668	0.084033	4	CTNNBL1,KIAA0406
chr3	62860205	62860206	SNP	6	TFBS,eQTL,enhancer,motif_alter,openChrom,promoter	CTBP2,CTCF,EZH2,MYC,POLR2A,RBBP5	.	MOTIFBR=DHS#SOX30_1#62860192#62860208#-#2#0.182071#0.332510	Nerve_Tibial,Thyroid,fibroblasts	.	Fetal_Heart,H1_BMP4_Derived_Mesendoderm_Cultured_Cells	HEART,Mesendoderm	A549_EtOH_0.02pct_Lung_Carcinoma_Cell_Line,Adipose_Derived_Mesenchymal_Stem_Cell_Cultured_Cells,Adipose_Nuclei,Bone_Marrow_Derived_Cultured_Mesenchymal_Stem_Cells,Brain_Angular_Gyrus,Brain_Anterior_Caudate,Brain_Cingulate_Gyrus,Brain_Dorsolateral_Prefrontal_Cortex,Brain_Germinal_Matrix,Brain_Hippocampus_Middle,Brain_Inferior_Temporal_Lobe,Brain_Substantia_Nigra,Breast_Myoepithelial_Primary_Cells,…	ADRENAL,BLOOD,BRAIN,BREAST,ENDODERM,ESC,FAT,GI_COLON,GI_DUODENUM,GI_ESOPHAGUS,GI_INTESTINE,GI_RECTUM,GI_STOMACH,HEART,LUNG,MUSCLE,MUSCLE_LEG,Mesendoderm,OVARY,PANCREAS,PLACENTA,SKIN,STROMAL_CONNECTIVE,STRONAL_CONNECTIVE,THYMUS,Trophoblast,iPSC	Brain_Angular_Gyrus,Brain_Anterior_Caudate,Brain_Cingulate_Gyrus,Brain_Dorsolateral_Prefrontal_Cortex,Brain_Hippocampus_Middle,Brain_Inferior_Temporal_Lobe,Brain_Substantia_Nigra,Fetal_Adrenal_Gland,Fetal_Intestine_Small,Fetal_Stomach,Foreskin_Fibroblast_Primary_Cells_skin01,Foreskin_Melanocyte_Primary_Cells_skin03,H1_BMP4_Derived_Mesendoderm_Cultured_Cells,H1_Cells,H9_Cells,HUES48_Cells,HUES64_C…	ADRENAL,BRAIN,ENDODERM,ESC,GI_COLON,GI_INTESTINE,GI_RECTUM,GI_STOMACH,HEART,LUNG,Mesendoderm,PANCREAS,SKIN,iPSC	.	.	.		.	A	G	G	G	G	G/G,G/G	rs140896848	AF=0.0309505	0.866	2.026	0.551	0.998	1	0.984	3453.7	0	14.37	0.095506	.	CADPS
chr4	100736820	100736821	SNC	6	DE_gene,TFBS,TFBS_motif,enhancer,openChrom,promoter	FOS,POLR2A,STAT3	AP1	.	.	.	Fetal_Adrenal_Gland,Primary_monocytes_from_peripheral_blood	ADRENAL,BLOOD	Monocytes-CD14+_RO01746_Primary_Cells,Primary_T_helper_cells_PMA-I_stimulated,Primary_neutrophils_from_peripheral_blood,Rectal_Mucosa_Donor_29,Stomach_Mucosa	BLOOD,GI_RECTUM,GI_STOMACH	Colonic_Mucosa,Esophagus,Fetal_Adrenal_Gland,Fetal_Stomach,Fetal_Thymus,Foreskin_Keratinocyte_Primary_Cells_skin03,Gastric,HMEC_Mammary_Epithelial_Primary_Cells,Monocytes-CD14+_RO01746_Primary_Cells,NHEK-Epidermal_Keratinocyte_Primary_Cells,Placenta,Primary_B_cells_from_peripheral_blood,Primary_Natural_Killer_cells_from_peripheral_blood,Primary_T_CD8+_memory_cells_from_peripheral_blood,Primary_T_…	ADRENAL,BLOOD,BREAST,GI_COLON,GI_ESOPHAGUS,GI_INTESTINE,GI_RECTUM,GI_STOMACH,PLACENTA,SKIN,THYMUS	.	.	DAPP1	testis	.	A	G	G	G	G	G/G,G/G	.	0	0.1	0.097	-0.3	0.004	0.003	0.005	.	.	1.831	0.126639	.	DAPP1
chr4	119755320	119755321	SNP	6	TFBS,eQTL,enhancer,motif_alter,openChrom,promoter	ATF2,BCL11A,EP300,JUND,NFIC,RFX5	.	MOTIFBR=BCL11A,DHS,IRF4,JUND,RFX5#HOXA11_1#119755305#119755321#-#0#0.152138#0.312609,BCL11A,DHS,IRF4,JUND,RFX5#HOXC10_1#119755305#119755321#-#0#0.137871#0.304153,BCL11A,DHS,IRF4,JUND,RFX5#HOXC11_1#119755305#119755321#-#0#0.196584#0.352701	Adipose_Visceral	.	IMR90_fetal_lung_fibroblasts_Cell_Line,Small_Intestine	GI_INTESTINE,LUNG	Adipose_Derived_Mesenchymal_Stem_Cell_Cultured_Cells,Bone_Marrow_Derived_Cultured_Mesenchymal_Stem_Cells,Breast_Myoepithelial_Primary_Cells,Dnd41_TCell_Leukemia_Cell_Line,Duodenum_Mucosa,Duodenum_Smooth_Muscle,Foreskin_Fibroblast_Primary_Cells_skin01,Foreskin_Fibroblast_Primary_Cells_skin02,GM12878_Lymphoblastoid_Cells,HSMM_cell_derived_Skeletal_Muscle_Myotubes_Cells,HUES48_Cells,HUES64_Cells,HUE…	BLOOD,BONE,BRAIN,BREAST,ENDODERM,ESC,FAT,GI_DUODENUM,GI_RECTUM,LIVER,LUNG,MUSCLE,PANCREAS,SKIN,STROMAL_CONNECTIVE,STRONAL_CONNECTIVE,VASCULAR,iPSC	Adipose_Nuclei,Bone_Marrow_Derived_Cultured_Mesenchymal_Stem_Cells,Duodenum_Smooth_Muscle,Foreskin_Fibroblast_Primary_Cells_skin01,Foreskin_Keratinocyte_Primary_Cells_skin03,GM12878_Lymphoblastoid_Cells,HMEC_Mammary_Epithelial_Primary_Cells,HUVEC_Umbilical_Vein_Endothelial_Primary_Cells,Liver,Mesenchymal_Stem_Cell_Derived_Chondrocyte_Cultured_Cells,Monocytes-CD14+_RO01746_Primary_Cells,NH-A_Astro…	BLOOD,BONE,BRAIN,BREAST,FAT,GI_DUODENUM,LIVER,LUNG,PANCREAS,SKIN,STROMAL_CONNECTIVE,STRONAL_CONNECTIVE,VASCULAR,iPSC	.	.	.		.	C	T	T	T	T	T/T,T/T	rs115673173	AF=0.019369	-0.845	-0.953	-0.278	0	0	0.002	.	.	6.267	0.093295	2b	METTL14,SEC24D
chr7	55594823	55594824	SNP	6	TFBS,eQTL,enhancer,motif_alter,openChrom,promoter	MAX,MAZ,MXI1,REST,SIN3A,SIN3AK20,SP2,ZNF143	.	MOTIFBR=REST#DLX2_1#55594821#55594837#+#4#0.312895#0.488521	Nerve_Tibial	.	Fetal_Heart,H1_Cells	ESC,HEART	Brain_Angular_Gyrus,Brain_Anterior_Caudate,Brain_Germinal_Matrix,Brain_Hippocampus_Middle,GM12878_Lymphoblastoid_Cells,HUES48_Cells	BLOOD,BRAIN,ESC	Brain_Anterior_Caudate,Brain_Dorsolateral_Prefrontal_Cortex,Brain_Hippocampus_Middle,Fetal_Thymus,GM12878_Lymphoblastoid_Cells,HUES48_Cells,Monocytes-CD14+_RO01746_Primary_Cells,Primary_B_cells_from_peripheral_blood,Primary_monocytes_from_peripheral_blood,Rectal_Mucosa_Donor_29,Sigmoid_Colon,Skeletal_Muscle_Female,Small_Intestine	BLOOD,BRAIN,ESC,GI_COLON,GI_INTESTINE,GI_RECTUM,MUSCLE,THYMUS	.	.	.		.	A	G	G	G	G	G/G,G/G	rs117187551	AF=0.00519169	-0.377	-0.227	0.651	0	0	0.029	184.9	1.2423e-16	4.578	0.119485	2b	LANCL2,VOPP1
chr7	55614550	55614551	SNP	6	TFBS,eQTL,eRNA,enhancer,openChrom,promoter	EP300,FOS,FOSL2,JUN,JUND,MAFK,POLR2A,RELA,REST,RFX5,SMARCC1,TCF7L2	.	.	Nerve_Tibial	.	iPS_DF_19.11_Cells	iPSC	A549_EtOH_0.02pct_Lung_Carcinoma_Cell_Line,Adipose_Nuclei,Brain_Dorsolateral_Prefrontal_Cortex,Foreskin_Fibroblast_Primary_Cells_skin01,Foreskin_Fibroblast_Primary_Cells_skin02,GM12878_Lymphoblastoid_Cells,HeLa-S3_Cervical_Carcinoma_Cell_Line,Mesenchymal_Stem_Cell_Derived_Chondrocyte_Cultured_Cells,Muscle_Satellite_Cultured_Cells,NH-A_Astrocytes_Primary_Cells,Primary_T_helper_17_cells_PMA-I_stimu…	BLOOD,BRAIN,CERVIX,FAT,LUNG,MUSCLE,SKIN,STROMAL_CONNECTIVE	A549_EtOH_0.02pct_Lung_Carcinoma_Cell_Line,Bone_Marrow_Derived_Cultured_Mesenchymal_Stem_Cells,Brain_Angular_Gyrus,Brain_Cingulate_Gyrus,Brain_Dorsolateral_Prefrontal_Cortex,Dnd41_TCell_Leukemia_Cell_Line,Foreskin_Fibroblast_Primary_Cells_skin01,Foreskin_Fibroblast_Primary_Cells_skin02,Foreskin_Keratinocyte_Primary_Cells_skin03,GM12878_Lymphoblastoid_Cells,H1_Derived_Mesenchymal_Stem_Cells,HMEC_M…	BLOOD,BONE,BRAIN,BREAST,CERVIX,GI_COLON,HEART,LIVER,LUNG,MUSCLE,PANCREAS,SKIN,STROMAL_CONNECTIVE,STRONAL_CONNECTIVE,VASCULAR	basophil,dendritic_cell,hepatocyte,monocyte	.	.		.	T	C	C	C	C	C/C,C/C	rs140547705	AF=0.00519169	-3.582	-3.809	-1.061	0	0	0	.	.	0.248	0.120541	.	LANCL2,VOPP1
chr7	55637468	55637469	SNP	6	TFBS,eQTL,eRNA,enhancer,openChrom,promoter	BHLHE40,CHD1,EBF1,GATA3,MXI1,NRF1,POLR2A,RELA,TBP	.	.	Nerve_Tibial	.	Fetal_Kidney,Gastric,H1_BMP4_Derived_Mesendoderm_Cultured_Cells,Primary_T_cells_from_cord_blood,Primary_T_cells_from_peripheral_blood	BLOOD,GI_STOMACH,KIDNEY,Mesendoderm	Dnd41_TCell_Leukemia_Cell_Line,Duodenum_Smooth_Muscle,Fetal_Brain_Female,Fetal_Thymus,GM12878_Lymphoblastoid_Cells,HUES48_Cells,HUES6_Cells,HUVEC_Umbilical_Vein_Endothelial_Primary_Cells,Primary_B_cells_from_peripheral_blood,Primary_T_cells_effector/memory_enriched_from_peripheral_blood,Primary_T_helper_17_cells_PMA-I_stimulated,Primary_T_helper_cells_PMA-I_stimulated,Primary_T_helper_cells_from_…	BLOOD,BRAIN,ESC,GI_DUODENUM,GI_RECTUM,THYMUS,VASCULAR	Brain_Cingulate_Gyrus,Brain_Inferior_Temporal_Lobe,Colonic_Mucosa,Dnd41_TCell_Leukemia_Cell_Line,Duodenum_Smooth_Muscle,Fetal_Intestine_Large,Fetal_Thymus,Foreskin_Fibroblast_Primary_Cells_skin01,Foreskin_Keratinocyte_Primary_Cells_skin03,GM12878_Lymphoblastoid_Cells,HUES48_Cells,HUES64_Cells,HUVEC_Umbilical_Vein_Endothelial_Primary_Cells,Liver,Monocytes-CD14+_RO01746_Primary_Cells,NH-A_Astrocyte…	BLOOD,BRAIN,ENDODERM,ESC,GI_COLON,GI_DUODENUM,GI_INTESTINE,GI_RECTUM,LIVER,MUSCLE,PANCREAS,SKIN,SPLEEN,THYMUS,VASCULAR,iPSC	dendritic_cell,natural_killer_cell	.	.		.	A	G	G	G	C	G/G,G/G	rs142165981	AF=0.00519169	-0.045	-0.045	-0.133	0.001	0.001	0.004	.	.	2.452	0.077194	.	LANCL2,VOPP1
chr7	120162439	120162440	SNC	6	NeanderDenisDesert,TFBS,enhancer,motif_alter,openChrom,promoter	BCL11A,SP1	.	MOTIFBR=BCL11A#OBOX5_1#120162437#120162454#-#14#0.030820#0.081369,BCL11A#OTX1_1#120162437#120162454#-#14#0.094129#0.125407	.	.	Fetal_Adrenal_Gland,H1_BMP4_Derived_Mesendoderm_Cultured_Cells	ADRENAL,Mesendoderm	HUES48_Cells,HUES64_Cells,HUES6_Cells,hESC_Derived_CD184+_Endoderm_Cultured_Cells,iPS-15b_Cells,iPS-18_Cells,iPS-20b_Cells	ENDODERM,ESC,iPSC	H1_BMP4_Derived_Mesendoderm_Cultured_Cells,H1_Cells,H9_Cells,HUES48_Cells,HUES64_Cells,HUES6_Cells,hESC_Derived_CD184+_Endoderm_Cultured_Cells,hESC_Derived_CD56+_Ectoderm_Cultured_Cells,iPS-18_Cells,iPS-20b_Cells,iPS_DF_19.11_Cells	ENDODERM,ESC,Mesendoderm,iPSC	.	NeanderDenisDesert	.		.	G	C	C	C	C	C/C,C/C	.	0	2.946	2.605	0.651	0.152	0.046	0.026	416.1	1.98168e-25	4.617	0.108992	.	KCND2,TSPAN12
chr7	122326650	122326651	SNC	6	NeanderDenisDesert,TFBS,TFBS_motif,enhancer,openChrom,promoter	EBF1,MAX	UAK30	.	.	.	H1_BMP4_Derived_Mesendoderm_Cultured_Cells,H1_Cells,H9_Cells,iPS_DF_19.11_Cells,iPS_DF_6.9_Cells	ESC,Mesendoderm,iPSC	iPS-20b_Cells	iPSC	HUES48_Cells,iPS_DF_19.11_Cells	ESC,iPSC	.	NeanderDenisDesert	.		.	G	T	T	T	T	T/T,T/T	.	0	0.386	0.356	0.249	0	0	0.074	.	.	3.018	0.108992	.	FEZF1,RNF133
chr8	37404607	37404608	SNC	6	TFBS,TFBS_motif,enhancer,motif_alter,openChrom,promoter	FOXP2,GATA3,MYC	UAK35	MOTIFBR=DHS,GATA3,MYC#RARA_2#37404600#37404618#+#9#0.043011#0.247312,DHS,GATA3,MYC#RARA_6#37404600#37404618#+#9#0.041412#0.315448,DHS,GATA3,MYC#RARA_8#37404600#37404618#+#9#0.062500#0.354167,DHS,GATA3,MYC#RARB_2#37404600#37404618#+#9#0.160183#0.322654,DHS,GATA3,MYC#RARG_3#37404601#37404618#+#8#0.109091#0.299822,DHS,GATA3,MYC#RARG_6#37404601#37404618#+#8#0.054945#0.461538,DHS,GATA3,MYC#RARG_9#3740…	.	.	Placenta	PLACENTA	Adipose_Derived_Mesenchymal_Stem_Cell_Cultured_Cells,Adipose_Nuclei,Brain_Anterior_Caudate,Brain_Cingulate_Gyrus,Brain_Dorsolateral_Prefrontal_Cortex,Brain_Hippocampus_Middle,Brain_Inferior_Temporal_Lobe,Brain_Substantia_Nigra,Colon_Smooth_Muscle,Colonic_Mucosa,Duodenum_Mucosa,Duodenum_Smooth_Muscle,Esophagus,Fetal_Adrenal_Gland,Fetal_Lung,Fetal_Stomach,Foreskin_Keratinocyte_Primary_Cells_skin02,…	ADRENAL,BLOOD,BONE,BRAIN,FAT,GI_COLON,GI_DUODENUM,GI_ESOPHAGUS,GI_RECTUM,GI_STOMACH,LIVER,LUNG,MUSCLE,OVARY,PLACENTA,SKIN,STRONAL_CONNECTIVE	Brain_Inferior_Temporal_Lobe,Colon_Smooth_Muscle,Colonic_Mucosa,Esophagus,Fetal_Stomach,IMR90_fetal_lung_fibroblasts_Cell_Line,Lung,Monocytes-CD14+_RO01746_Primary_Cells,Ovary,Rectal_Mucosa_Donor_29,Rectal_Mucosa_Donor_31,Rectal_Smooth_Muscle,Spleen,Stomach_Smooth_Muscle	BLOOD,BRAIN,GI_COLON,GI_ESOPHAGUS,GI_RECTUM,GI_STOMACH,LUNG,OVARY,SPLEEN	.	.	.		.	A	G	G	G	G	G/G,G/G	.	0	0.419	0.346	0.651	0.07	0.274	0.083	1045	1.90122e-52	7.321	0.06567	.	FKSG2,ZNF703
chr9	133814258	133814259	SNP	6	TFBS,TFBS_motif,enhancer,motif_alter,openChrom,promoter	E2F1,EZH2,SMARCB1,ZNF263	E2F1	MOTIFG=TEAD2_1#133814256#133814263#-#4#7.627#3.233	.	.	Fetal_Brain_Female,Fetal_Brain_Male,Fetal_Intestine_Small,Fetal_Kidney,Fetal_Lung,Fetal_Muscle_Leg,Fetal_Muscle_Trunk,iPS_DF_19.11_Cells	BRAIN,GI_INTESTINE,KIDNEY,LUNG,MUSCLE,MUSCLE_LEG,iPSC	A549_EtOH_0.02pct_Lung_Carcinoma_Cell_Line,Adipose_Derived_Mesenchymal_Stem_Cell_Cultured_Cells,Adipose_Nuclei,Aorta,Bone_Marrow_Derived_Cultured_Mesenchymal_Stem_Cells,Brain_Angular_Gyrus,Brain_Anterior_Caudate,Brain_Cingulate_Gyrus,Brain_Dorsolateral_Prefrontal_Cortex,Brain_Germinal_Matrix,Brain_Hippocampus_Middle,Brain_Inferior_Temporal_Lobe,Breast_Myoepithelial_Primary_Cells,Breast_variant_Hu…	ADRENAL,BLOOD,BONE,BRAIN,BREAST,CERVIX,ENDODERM,ESC,FAT,GI_COLON,GI_DUODENUM,GI_ESOPHAGUS,GI_INTESTINE,GI_RECTUM,GI_STOMACH,HEART,LIVER,LUNG,MUSCLE,MUSCLE_LEG,Mesendoderm,OVARY,PANCREAS,PLACENTA,SKIN,STROMAL_CONNECTIVE,STRONAL_CONNECTIVE,THYMUS,Trophoblast,VASCULAR,iPSC	H1_BMP4_Derived_Trophoblast_Cultured_Cells,HeLa-S3_Cervical_Carcinoma_Cell_Line,IMR90_fetal_lung_fibroblasts_Cell_Line	CERVIX,LUNG,Trophoblast	.	.	.		.	G	NA	C	NA	C	C/C,C/C	rs529592234	AF=0.0071885	0.869	1.608	0.275	1	1	0.553	524.8	2.79921e-42	.	0.110573	.	FIBCD1
chr1	14029138	14029139	SNP	5	TFBS,eRNA,enhancer,motif_alter,promoter	CEBPB,MTA3,PML,STAT5A	.	MOTIFBR=DHS#FOXJ2_1#14029121#14029139#-#0#0.121951#0.292683	.	.	.	.	Fetal_Lung,Foreskin_Keratinocyte_Primary_Cells_skin02,Foreskin_Keratinocyte_Primary_Cells_skin03,GM12878_Lymphoblastoid_Cells,Primary_B_cells_from_peripheral_blood,Primary_T_CD8+_naive_cells_from_peripheral_blood,Primary_T_cells_effector/memory_enriched_from_peripheral_blood,Primary_T_cells_from_cord_blood,Primary_T_cells_from_peripheral_blood,Primary_T_helper_17_cells_PMA-I_stimulated,Primary_T_…	BLOOD,GI_RECTUM,LUNG,SKIN	Fetal_Thymus,Foreskin_Keratinocyte_Primary_Cells_skin03,GM12878_Lymphoblastoid_Cells,NHEK-Epidermal_Keratinocyte_Primary_Cells,Primary_B_cells_from_peripheral_blood,Primary_Natural_Killer_cells_from_peripheral_blood,Primary_T_CD8+_memory_cells_from_peripheral_blood,Primary_T_CD8+_naive_cells_from_peripheral_blood,Primary_T_cells_effector/memory_enriched_from_peripheral_blood,Primary_T_cells_from_…	BLOOD,GI_RECTUM,SKIN,THYMUS	T_cell,lymphocyte_of_B_lineage,natural_killer_cell,neutrophil	.	.		.	A	G	G	G	G	G/G,G/G	rs2487627	AF=0.0950479	0.2	0.199	-0.257	0.292	0.252	0.625	413.1	2.35473e-52	10.61	0.078448	5	PRDM2
chr1	26348514	26348515	SNP	5	TFBS,enhancer,motif_alter,openChrom,promoter	ATF2,GATA1,GATA2,POLR2A,SP4	.	MOTIFBR=DHS#NR1H_1#26348500#26348518#-#3#0.000000#0.125000	.	.	Fetal_Heart,Fetal_Muscle_Trunk,Psoas_Muscle	HEART,MUSCLE	Adipose_Derived_Mesenchymal_Stem_Cell_Cultured_Cells,Bone_Marrow_Derived_Cultured_Mesenchymal_Stem_Cells,Brain_Angular_Gyrus,Brain_Anterior_Caudate,Brain_Cingulate_Gyrus,Brain_Dorsolateral_Prefrontal_Cortex,Brain_Germinal_Matrix,Brain_Hippocampus_Middle,Brain_Inferior_Temporal_Lobe,Brain_Substantia_Nigra,Breast_Myoepithelial_Primary_Cells,Colon_Smooth_Muscle,Colonic_Mucosa,Cortex_derived_primary_…	ADRENAL,BONE,BRAIN,BREAST,ENDODERM,ESC,FAT,GI_COLON,GI_DUODENUM,GI_INTESTINE,GI_RECTUM,GI_STOMACH,HEART,LIVER,LUNG,MUSCLE,MUSCLE_LEG,OVARY,PLACENTA,SKIN,STROMAL_CONNECTIVE,STRONAL_CONNECTIVE,THYMUS,iPSC	Brain_Angular_Gyrus,Brain_Anterior_Caudate,Brain_Cingulate_Gyrus,Brain_Dorsolateral_Prefrontal_Cortex,Brain_Hippocampus_Middle,Brain_Inferior_Temporal_Lobe,Brain_Substantia_Nigra,Fetal_Intestine_Small,Fetal_Muscle_Leg,Fetal_Muscle_Trunk,Fetal_Stomach,Foreskin_Fibroblast_Primary_Cells_skin01,Foreskin_Fibroblast_Primary_Cells_skin02,Foreskin_Melanocyte_Primary_Cells_skin01,Foreskin_Melanocyte_Prima…	BONE,BRAIN,ENDODERM,GI_INTESTINE,GI_RECTUM,GI_STOMACH,HEART,LUNG,MUSCLE,MUSCLE_LEG,OVARY,PLACENTA,SKIN,SPLEEN,STROMAL_CONNECTIVE	.	.	.		.	G	T	T	T	T	T/T,T/T	rs550780523	AF=0.000199681	0.002	0.174	-0.415	0.132	0.743	0.407	423.2	7.03476e-12	10.47	0.11248	.	EXTL1
chr1	38455388	38455389	SNP	5	TFBS,eQTL,enhancer,openChrom,promoter	CHD1,E2F4,E2F6,GABPA,HDAC1,KDM5B,MYC,PHF8,POLR2A,SAP30,SMARCB1	.	.	Artery_Tibial,Nerve_Tibial	.	Fetal_Muscle_Leg,H1_BMP4_Derived_Mesendoderm_Cultured_Cells,H1_Derived_Mesenchymal_Stem_Cells,H1_Derived_Neuronal_Progenitor_Cultured_Cells,H9_Cells,Ovary,Placenta,Primary_Natural_Killer_cells_from_peripheral_blood,Primary_T_cells_from_peripheral_blood,Primary_hematopoietic_stem_cells_G-CSF-mobilized_Male	BLOOD,BRAIN,ESC,MUSCLE_LEG,Mesendoderm,OVARY,PLACENTA,STROMAL_CONNECTIVE	A549_EtOH_0.02pct_Lung_Carcinoma_Cell_Line,Adipose_Derived_Mesenchymal_Stem_Cell_Cultured_Cells,Adipose_Nuclei,Aorta,Bone_Marrow_Derived_Cultured_Mesenchymal_Stem_Cells,Brain_Angular_Gyrus,Brain_Anterior_Caudate,Brain_Cingulate_Gyrus,Brain_Dorsolateral_Prefrontal_Cortex,Brain_Germinal_Matrix,Brain_Hippocampus_Middle,Brain_Inferior_Temporal_Lobe,Brain_Substantia_Nigra,Breast_Myoepithelial_Primary_…	ADRENAL,BLOOD,BONE,BRAIN,BREAST,CERVIX,ENDODERM,ESC,FAT,GI_COLON,GI_DUODENUM,GI_ESOPHAGUS,GI_INTESTINE,GI_RECTUM,GI_STOMACH,HEART,KIDNEY,LIVER,LUNG,MUSCLE,MUSCLE_LEG,Mesendoderm,OVARY,PANCREAS,PLACENTA,SKIN,SPLEEN,STROMAL_CONNECTIVE,STRONAL_CONNECTIVE,THYMUS,Trophoblast,VASCULAR,iPSC	A549_EtOH_0.02pct_Lung_Carcinoma_Cell_Line,Adipose_Nuclei,Aorta,Bone_Marrow_Derived_Cultured_Mesenchymal_Stem_Cells,Brain_Angular_Gyrus,Brain_Anterior_Caudate,Brain_Cingulate_Gyrus,Brain_Dorsolateral_Prefrontal_Cortex,Brain_Hippocampus_Middle,Brain_Inferior_Temporal_Lobe,Brain_Substantia_Nigra,Colon_Smooth_Muscle,Dnd41_TCell_Leukemia_Cell_Line,Duodenum_Smooth_Muscle,Esophagus,Fetal_Adrenal_Gland,…	ADRENAL,BLOOD,BONE,BRAIN,BREAST,CERVIX,ENDODERM,ESC,FAT,GI_COLON,GI_DUODENUM,GI_ESOPHAGUS,GI_INTESTINE,GI_RECTUM,GI_STOMACH,HEART,LIVER,LUNG,MUSCLE,MUSCLE_LEG,Mesendoderm,OVARY,PANCREAS,PLACENTA,SKIN,SPLEEN,STROMAL_CONNECTIVE,STRONAL_CONNECTIVE,THYMUS,Trophoblast,VASCULAR,iPSC	.	.	.		.	T	C	C	C	C	C/C,C/C	rs3935867	AF=0.904353	1.886	2.275	0.462	0.031	0.057	0.014	.	.	.	0.046548	4	SF3A3
chr1	38462897	38462898	SNP	5	DE_gene,TFBS,eQTL,enhancer,promoter	GATA1,POLR2A	.	.	Whole_Blood	.	.	.	Colon_Smooth_Muscle,Duodenum_Smooth_Muscle,Foreskin_Fibroblast_Primary_Cells_skin01,Monocytes-CD14+_RO01746_Primary_Cells,Placenta_Amnion,Primary_hematopoietic_stem_cells_short_term_culture,Primary_neutrophils_from_peripheral_blood,Skeletal_Muscle_Female	BLOOD,GI_COLON,GI_DUODENUM,MUSCLE,PLACENTA,SKIN	Aorta,Brain_Angular_Gyrus,Brain_Anterior_Caudate,Brain_Cingulate_Gyrus,Brain_Dorsolateral_Prefrontal_Cortex,Brain_Hippocampus_Middle,Brain_Substantia_Nigra,Colon_Smooth_Muscle,Colonic_Mucosa,Duodenum_Smooth_Muscle,Esophagus,Fetal_Adrenal_Gland,Fetal_Intestine_Large,Fetal_Intestine_Small,Fetal_Muscle_Leg,Fetal_Muscle_Trunk,Fetal_Stomach,Foreskin_Fibroblast_Primary_Cells_skin01,Gastric,H1_BMP4_Deri…	ADRENAL,BLOOD,BRAIN,CERVIX,ENDODERM,ESC,GI_COLON,GI_DUODENUM,GI_ESOPHAGUS,GI_INTESTINE,GI_RECTUM,GI_STOMACH,HEART,LIVER,LUNG,MUSCLE,MUSCLE_LEG,Mesendoderm,OVARY,PLACENTA,SKIN,SPLEEN,STROMAL_CONNECTIVE,VASCULAR,iPSC	.	.	FHL3	testis	.	A	T	T	T	T	T/T,T/T	rs4274021	AF=0.936102	1.437	1.827	0.452	0.053	0.677	0.82	189.4	1.8098e-08	.	0.262962	.	FHL3,SF3A3
chr1	38478558	38478559	SNP	5	TFBS,enhancer,motif_alter,openChrom,promoter	ATF2,BCLAF1,CHD1,E2F1,ELK4,GABPA,GTF2F1,IRF1,KAP1,KDM5B,MAZ,MTA3,MXI1,MYC,NFATC1,NR2F2,PHF8,PML,POLR2A,POU2F2,RBBP5,RCOR1,RELA,REST,SAP30,SIN3A,SIN3AK20,STAT1,TAF1,TAF7,TBP,TCF7L2,TFAP2C,UBTF,YY1	.	MOTIFBR=ELK4,GABPA,NFKB1,SIN3A,TAF1,YY1#NKX2-1_2#38478553#38478565#+#7#0.225806#0.774194,MOTIFG=ZEB1_known5#38478557#38478563#-#4#6.794#2.475	.	.	Primary_monocytes_from_peripheral_blood	BLOOD	A549_EtOH_0.02pct_Lung_Carcinoma_Cell_Line,Adipose_Derived_Mesenchymal_Stem_Cell_Cultured_Cells,Adipose_Nuclei,Aorta,Bone_Marrow_Derived_Cultured_Mesenchymal_Stem_Cells,Brain_Angular_Gyrus,Brain_Anterior_Caudate,Brain_Cingulate_Gyrus,Brain_Dorsolateral_Prefrontal_Cortex,Brain_Germinal_Matrix,Brain_Hippocampus_Middle,Brain_Inferior_Temporal_Lobe,Brain_Substantia_Nigra,Breast_Myoepithelial_Primary_…	ADRENAL,BLOOD,BONE,BRAIN,BREAST,CERVIX,ENDODERM,ESC,FAT,GI_COLON,GI_DUODENUM,GI_ESOPHAGUS,GI_INTESTINE,GI_RECTUM,GI_STOMACH,HEART,KIDNEY,LIVER,LUNG,MUSCLE,MUSCLE_LEG,Mesendoderm,OVARY,PANCREAS,PLACENTA,SKIN,SPLEEN,STROMAL_CONNECTIVE,STRONAL_CONNECTIVE,THYMUS,Trophoblast,VASCULAR,iPSC	A549_EtOH_0.02pct_Lung_Carcinoma_Cell_Line,Adipose_Nuclei,Aorta,Bone_Marrow_Derived_Cultured_Mesenchymal_Stem_Cells,Brain_Angular_Gyrus,Brain_Anterior_Caudate,Brain_Cingulate_Gyrus,Brain_Dorsolateral_Prefrontal_Cortex,Brain_Hippocampus_Middle,Brain_Inferior_Temporal_Lobe,Brain_Substantia_Nigra,Colon_Smooth_Muscle,Colonic_Mucosa,Dnd41_TCell_Leukemia_Cell_Line,Duodenum_Smooth_Muscle,Esophagus,Fetal…	ADRENAL,BLOOD,BONE,BRAIN,BREAST,CERVIX,ENDODERM,ESC,FAT,GI_COLON,GI_DUODENUM,GI_ESOPHAGUS,GI_INTESTINE,GI_RECTUM,GI_STOMACH,HEART,LIVER,LUNG,MUSCLE,MUSCLE_LEG,Mesendoderm,OVARY,PANCREAS,PLACENTA,SKIN,SPLEEN,STROMAL_CONNECTIVE,STRONAL_CONNECTIVE,THYMUS,Trophoblast,VASCULAR,iPSC	.	.	.		.	A	G	G	G	G	G/G,G/G	rs111498247	AF=0.00199681	0.507	1.024	0.557	0	0.001	0.074	.	.	7.449	0.075627	2b	UTP11L
chr1	38495589	38495590	indel	5	TFBS,enhancer,motif_alter,openChrom,promoter	NFATC1,PML,POLR2A,STAT5A,WRNIP1	.	MOTIFBR=DHS#NR3C1_disc6#38495582#38495596#+	.	.	H9_Cells	ESC	Adipose_Nuclei,Brain_Hippocampus_Middle,Brain_Substantia_Nigra,Colon_Smooth_Muscle,Foreskin_Fibroblast_Primary_Cells_skin01,Foreskin_Fibroblast_Primary_Cells_skin02,Foreskin_Keratinocyte_Primary_Cells_skin03,HeLa-S3_Cervical_Carcinoma_Cell_Line,Mesenchymal_Stem_Cell_Derived_Chondrocyte_Cultured_Cells,NHEK-Epidermal_Keratinocyte_Primary_Cells,Osteoblast_Primary_Cells,Primary_T_regulatory_cells_fro…	BLOOD,BONE,BRAIN,CERVIX,FAT,GI_COLON,GI_STOMACH,MUSCLE,SKIN,STROMAL_CONNECTIVE,iPSC	Adipose_Nuclei,Bone_Marrow_Derived_Cultured_Mesenchymal_Stem_Cells,Brain_Anterior_Caudate,Brain_Dorsolateral_Prefrontal_Cortex,Brain_Hippocampus_Middle,Brain_Substantia_Nigra,Colon_Smooth_Muscle,Esophagus,Fetal_Adrenal_Gland,Fetal_Intestine_Small,Fetal_Muscle_Leg,Fetal_Muscle_Trunk,Fetal_Stomach,Foreskin_Fibroblast_Primary_Cells_skin01,Foreskin_Fibroblast_Primary_Cells_skin02,Foreskin_Keratinocyt…	ADRENAL,BLOOD,BONE,BRAIN,BREAST,CERVIX,ENDODERM,ESC,FAT,GI_COLON,GI_ESOPHAGUS,GI_INTESTINE,GI_RECTUM,GI_STOMACH,HEART,LIVER,LUNG,MUSCLE,MUSCLE_LEG,Mesendoderm,OVARY,PANCREAS,PLACENTA,SKIN,STROMAL_CONNECTIVE,STRONAL_CONNECTIVE,VASCULAR	.	.	.		.	C	CTG	CTG	CTG	CTG	CTG/CTG,CTG/CTG	rs576580518	AF=0.00199681	0.308	0	0.457	0.066	0.002	0.777	.	.	14.65	0.108992	.	POU3F1,UTP11L
chr1	46866996	46866997	SNP	5	TFBS,TFBS_motif,enhancer,motif_alter,openChrom	GATA2,TAL1	GATA1-ext	MOTIFBR=DHS,GATA2,TAL1#RUNX2_2#46866991#46866999#+#7#0.222222#0.555556	.	.	H9_Cells,Primary_hematopoietic_stem_cells_G-CSF-mobilized_Female	BLOOD,ESC	.	.	Brain_Angular_Gyrus,Brain_Anterior_Caudate,Brain_Cingulate_Gyrus,Brain_Dorsolateral_Prefrontal_Cortex,Brain_Hippocampus_Middle,Brain_Inferior_Temporal_Lobe,Brain_Substantia_Nigra,Colonic_Mucosa,H1_Cells,Monocytes-CD14+_RO01746_Primary_Cells,Rectal_Mucosa_Donor_29,Rectal_Mucosa_Donor_31,Skeletal_Muscle_Female	BLOOD,BRAIN,ESC,GI_COLON,GI_RECTUM,MUSCLE	.	.	.		.	T	C	C	C	C	C/C,C/C	rs74227911	AF=0.0135783	-0.135	-0.153	-0.775	0	0	0.001	.	.	0.865	0.080785	2b	DMBX1,FAAH
chr1	104060254	104060255	SNC	5	NeanderDenisDesert,TFBS,enhancer,motif_alter,promoter	ATF2,NFYB	.	MOTIFBR=DHS#AP1_known7#104060247#104060259#+#9#0.239130#0.304348	.	.	.	.	GM12878_Lymphoblastoid_Cells	BLOOD	GM12878_Lymphoblastoid_Cells,NH-A_Astrocytes_Primary_Cells,Spleen	BLOOD,BRAIN,SPLEEN	.	NeanderDenisDesert	.		.	G	A	A	A	A	A/A,A/A	.	0	0.354	0.309	0.255	0	0	0.07	.	.	3.543	0.108992	.	COL11A1,RNPC3
chr1	113431367	113431368	SNC	5	NeanderDenisDesert,TFBS,enhancer,openChrom,promoter	BHLHE40,GATA2,TEAD4,YY1	.	.	.	.	Fetal_Kidney	KIDNEY	iPS_DF_19.11_Cells	iPSC	K562_Leukemia_Cells,iPS_DF_19.11_Cells	BLOOD,iPSC	.	NeanderDenisDesert	.		.	T	C	C	C	C	C/C,C/C	.	0	0.212	0.224	0.532	0	0	0.001	.	.	1.859	0.053691	.	FAM19A3,SLC16A1
chr1	113499775	113499776	SNP	5	NeanderDenisDesert,TFBS,enhancer,openChrom,promoter	E2F6,MAX,MTA3,MXI1,MYC,POLR2A,SIN3AK20,TBP,TCF7L2,ZNF263	.	.	.	.	Fetal_Thymus	THYMUS	A549_EtOH_0.02pct_Lung_Carcinoma_Cell_Line,Adipose_Derived_Mesenchymal_Stem_Cell_Cultured_Cells,Adipose_Nuclei,Aorta,Bone_Marrow_Derived_Cultured_Mesenchymal_Stem_Cells,Brain_Angular_Gyrus,Brain_Anterior_Caudate,Brain_Cingulate_Gyrus,Brain_Dorsolateral_Prefrontal_Cortex,Brain_Germinal_Matrix,Brain_Hippocampus_Middle,Brain_Inferior_Temporal_Lobe,Brain_Substantia_Nigra,Breast_Myoepithelial_Primary_…	ADRENAL,BLOOD,BONE,BRAIN,BREAST,CERVIX,ENDODERM,ESC,FAT,GI_COLON,GI_DUODENUM,GI_ESOPHAGUS,GI_INTESTINE,GI_RECTUM,GI_STOMACH,HEART,KIDNEY,LIVER,LUNG,MUSCLE,MUSCLE_LEG,Mesendoderm,OVARY,PLACENTA,SKIN,STROMAL_CONNECTIVE,STRONAL_CONNECTIVE,THYMUS,Trophoblast,VASCULAR,iPSC	A549_EtOH_0.02pct_Lung_Carcinoma_Cell_Line,Adipose_Nuclei,Aorta,Bone_Marrow_Derived_Cultured_Mesenchymal_Stem_Cells,Brain_Angular_Gyrus,Brain_Anterior_Caudate,Brain_Cingulate_Gyrus,Brain_Dorsolateral_Prefrontal_Cortex,Brain_Hippocampus_Middle,Brain_Inferior_Temporal_Lobe,Brain_Substantia_Nigra,Colon_Smooth_Muscle,Colonic_Mucosa,Dnd41_TCell_Leukemia_Cell_Line,Duodenum_Smooth_Muscle,Esophagus,Fetal…	ADRENAL,BLOOD,BONE,BRAIN,BREAST,CERVIX,ENDODERM,ESC,FAT,GI_COLON,GI_DUODENUM,GI_ESOPHAGUS,GI_INTESTINE,GI_RECTUM,GI_STOMACH,HEART,LIVER,LUNG,MUSCLE,MUSCLE_LEG,Mesendoderm,OVARY,SKIN,SPLEEN,STROMAL_CONNECTIVE,STRONAL_CONNECTIVE,THYMUS,VASCULAR,iPSC	.	NeanderDenisDesert	.		.	C	A	A	A	A	A/A,A/A	rs115748179	AF=0.0105831	-0.712	-0.791	-1.134	0	0	0	.	.	6.019	0.142881	2b	SLC16A1
chr1	170043388	170043389	SNP	5	TFBS,eQTL,enhancer,openChrom,promoter	EBF1,HDAC1,KAP1,KDM5B,NFIC,PML,POLR2A,RBBP5,SAP30	.	.	Adipose_Subcutaneous,Adipose_Visceral,Adrenal_Gland,Artery_Aorta,Artery_Coronary,Artery_Tibial,Brain_Anterior_cingulate_cortex,Brain_Caudate_basal_ganglia,Brain_Cerebellar_Hemisphere,Brain_Cerebellum,Brain_Frontal_Cortex,Brain_Hippocampus,Brain_Putamen_basal_ganglia,Breast_Mammary_Tissue,Colon_Sigmoid,Colon_Transverse,Esophagus_Gastroesophageal_Junction,Esophagus_Mucosa,Esophagus_Muscularis,Heart…	.	Fetal_Intestine_Small,H1_BMP4_Derived_Mesendoderm_Cultured_Cells	GI_INTESTINE,Mesendoderm	A549_EtOH_0.02pct_Lung_Carcinoma_Cell_Line,Adipose_Derived_Mesenchymal_Stem_Cell_Cultured_Cells,Adipose_Nuclei,Aorta,Bone_Marrow_Derived_Cultured_Mesenchymal_Stem_Cells,Brain_Angular_Gyrus,Brain_Anterior_Caudate,Brain_Cingulate_Gyrus,Brain_Dorsolateral_Prefrontal_Cortex,Brain_Germinal_Matrix,Brain_Hippocampus_Middle,Brain_Inferior_Temporal_Lobe,Brain_Substantia_Nigra,Breast_Myoepithelial_Primary_…	ADRENAL,BLOOD,BONE,BRAIN,BREAST,CERVIX,ENDODERM,ESC,FAT,GI_COLON,GI_DUODENUM,GI_ESOPHAGUS,GI_INTESTINE,GI_RECTUM,GI_STOMACH,HEART,KIDNEY,LIVER,LUNG,MUSCLE,MUSCLE_LEG,Mesendoderm,OVARY,PANCREAS,PLACENTA,SKIN,SPLEEN,STROMAL_CONNECTIVE,STRONAL_CONNECTIVE,THYMUS,Trophoblast,VASCULAR,iPSC	A549_EtOH_0.02pct_Lung_Carcinoma_Cell_Line,Adipose_Nuclei,Aorta,Bone_Marrow_Derived_Cultured_Mesenchymal_Stem_Cells,Brain_Angular_Gyrus,Brain_Anterior_Caudate,Brain_Cingulate_Gyrus,Brain_Dorsolateral_Prefrontal_Cortex,Brain_Hippocampus_Middle,Brain_Inferior_Temporal_Lobe,Brain_Substantia_Nigra,Colon_Smooth_Muscle,Colonic_Mucosa,Dnd41_TCell_Leukemia_Cell_Line,Duodenum_Smooth_Muscle,Esophagus,Fetal…	ADRENAL,BLOOD,BONE,BRAIN,BREAST,CERVIX,ENDODERM,FAT,GI_COLON,GI_DUODENUM,GI_ESOPHAGUS,GI_INTESTINE,GI_RECTUM,GI_STOMACH,HEART,LIVER,LUNG,MUSCLE,MUSCLE_LEG,OVARY,PANCREAS,PLACENTA,SKIN,SPLEEN,STROMAL_CONNECTIVE,STRONAL_CONNECTIVE,THYMUS,Trophoblast,VASCULAR	.	.	.		.	T	C	C	C	C	C/C,C/C	rs12141428	AF=0.0427316	0.424	0.425	0.645	0	0	0.018	.	.	5.911	0.093295	1f	KIFAP3
chr1	198590420	198590421	SNP	5	TFBS,eRNA,enhancer,openChrom,promoter	ATF2,BATF,CTCF,ELF1,ELK1,FOXM1,IKZF1,IRF4,MAX,MEF2A,MTA3,MXI1,MYC,NFIC,PML,POLR2A,RELA,REST,RUNX3,STAT5A,TAF1	.	.	.	.	Primary_T_cells_from_cord_blood,Primary_monocytes_from_peripheral_blood,Small_Intestine	BLOOD,GI_INTESTINE	Dnd41_TCell_Leukemia_Cell_Line,Duodenum_Mucosa,Duodenum_Smooth_Muscle,Fetal_Thymus,GM12878_Lymphoblastoid_Cells,Monocytes-CD14+_RO01746_Primary_Cells,Primary_B_cells_from_cord_blood,Primary_B_cells_from_peripheral_blood,Primary_Natural_Killer_cells_from_peripheral_blood,Primary_T_CD8+_memory_cells_from_peripheral_blood,Primary_T_CD8+_naive_cells_from_peripheral_blood,Primary_T_cells_effector/memo…	BLOOD,GI_DUODENUM,GI_RECTUM,THYMUS	Colonic_Mucosa,Dnd41_TCell_Leukemia_Cell_Line,Duodenum_Smooth_Muscle,Esophagus,Fetal_Intestine_Large,Fetal_Thymus,GM12878_Lymphoblastoid_Cells,Liver,Lung,Monocytes-CD14+_RO01746_Primary_Cells,Primary_B_cells_from_peripheral_blood,Primary_Natural_Killer_cells_from_peripheral_blood,Primary_T_CD8+_memory_cells_from_peripheral_blood,Primary_T_CD8+_naive_cells_from_peripheral_blood,Primary_T_cells_eff…	BLOOD,GI_COLON,GI_DUODENUM,GI_ESOPHAGUS,GI_INTESTINE,GI_RECTUM,LIVER,LUNG,SPLEEN,THYMUS	T_cell,blood,monocyte,neutrophil	.	.		.	C	T	T	T	T	T/T,T/T	rs16843471	AF=0.0756789	0	0.099	0.398	0	0	0.01	.	.	5.948	0	4	ATP6V1G3,PTPRC
chr1	198590453	198590454	SNP	5	TFBS,eRNA,enhancer,openChrom,promoter	ATF2,BATF,CHD2,ELF1,ELK1,FOXM1,IKZF1,MAX,MEF2A,MTA3,MXI1,MYC,NFIC,PML,POLR2A,RELA,REST,RUNX3,SPI1,STAT3,STAT5A,TAF1,TBP,WRNIP1	.	.	.	.	Fetal_Thymus,Primary_B_cells_from_peripheral_blood,Primary_Natural_Killer_cells_from_peripheral_blood,Primary_T_cells_from_cord_blood,Primary_T_cells_from_peripheral_blood,Primary_monocytes_from_peripheral_blood,Small_Intestine	BLOOD,GI_INTESTINE,THYMUS	Dnd41_TCell_Leukemia_Cell_Line,Duodenum_Mucosa,Duodenum_Smooth_Muscle,Fetal_Thymus,GM12878_Lymphoblastoid_Cells,Monocytes-CD14+_RO01746_Primary_Cells,Primary_B_cells_from_cord_blood,Primary_B_cells_from_peripheral_blood,Primary_Natural_Killer_cells_from_peripheral_blood,Primary_T_CD8+_memory_cells_from_peripheral_blood,Primary_T_CD8+_naive_cells_from_peripheral_blood,Primary_T_cells_effector/memo…	BLOOD,GI_DUODENUM,GI_RECTUM,THYMUS	Colonic_Mucosa,Dnd41_TCell_Leukemia_Cell_Line,Duodenum_Smooth_Muscle,Esophagus,Fetal_Intestine_Large,Fetal_Thymus,GM12878_Lymphoblastoid_Cells,Liver,Lung,Monocytes-CD14+_RO01746_Primary_Cells,Primary_B_cells_from_peripheral_blood,Primary_Natural_Killer_cells_from_peripheral_blood,Primary_T_CD8+_memory_cells_from_peripheral_blood,Primary_T_CD8+_naive_cells_from_peripheral_blood,Primary_T_cells_eff…	BLOOD,GI_COLON,GI_DUODENUM,GI_ESOPHAGUS,GI_INTESTINE,GI_RECTUM,LIVER,LUNG,SPLEEN,THYMUS	T_cell,blood,monocyte,neutrophil	.	.		.	A	C	C	C	C	C/C,C/C	rs16843474	AF=0.0760783	-0.626	-0.653	-2.169	0	0	0.017	.	.	0.448	0	4	ATP6V1G3,PTPRC
chr1	198592204	198592205	SNP	5	TFBS,enhancer,motif_alter,openChrom,promoter	EP300,MXI1	.	MOTIFG=SOX10_1#198592204#198592211#-#6#6.832#4.758,SOX10_2#198592205#198592211#-#6#6.736#2.388	.	.	Primary_B_cells_from_peripheral_blood	BLOOD	GM12878_Lymphoblastoid_Cells,Primary_B_cells_from_cord_blood,Primary_B_cells_from_peripheral_blood	BLOOD	Dnd41_TCell_Leukemia_Cell_Line,Fetal_Thymus,GM12878_Lymphoblastoid_Cells,Primary_B_cells_from_peripheral_blood,Primary_Natural_Killer_cells_from_peripheral_blood,Primary_T_cells_effector/memory_enriched_from_peripheral_blood,Primary_T_cells_from_peripheral_blood,Primary_T_helper_cells_PMA-I_stimulated,Primary_T_helper_cells_from_peripheral_blood,Primary_T_helper_memory_cells_from_peripheral_blood…	BLOOD,GI_RECTUM,THYMUS	.	.	.		.	G	A	A	A	A	A/A,A/A	rs35536362	AF=0.0758786	-0.9	-1.01	-0.326	0	0	0	.	.	3.035	0.108992	5	ATP6V1G3,PTPRC
chr1	203568198	203568199	SNP	5	DE_gene,enhancer,motif_alter,openChrom,promoter	.	.	MOTIFG=ETS_known8#203568198#203568204#-#5#5.743#1.374	.	.	H1_Cells	ESC	Foreskin_Fibroblast_Primary_Cells_skin02	SKIN	Brain_Inferior_Temporal_Lobe,Fetal_Stomach,Foreskin_Melanocyte_Primary_Cells_skin01,Foreskin_Melanocyte_Primary_Cells_skin03,H1_BMP4_Derived_Mesendoderm_Cultured_Cells,hESC_Derived_CD184+_Endoderm_Cultured_Cells,hESC_Derived_CD56+_Mesoderm_Cultured_Cells	BRAIN,ENDODERM,GI_STOMACH,Mesendoderm,SKIN	.	.	ATP2B4	testis	.	C	G	G	G	G	G/G,G/G	rs76056376	AF=0.0429313	0.743	0.747	0.557	0.928	0.914	0.815	106	2.03547e-07	19.57	0.074388	5	ATP2B4,OPTC
chr1	203570718	203570719	SNP	5	DE_gene,TFBS,enhancer,openChrom,promoter	E2F1,REST,TFAP2C	.	.	.	.	Foreskin_Fibroblast_Primary_Cells_skin01,Foreskin_Melanocyte_Primary_Cells_skin01,H1_BMP4_Derived_Trophoblast_Cultured_Cells	SKIN,Trophoblast	Fetal_Heart	HEART	Colon_Smooth_Muscle,Duodenum_Smooth_Muscle,Fetal_Intestine_Large,Fetal_Intestine_Small,Fetal_Muscle_Leg,Fetal_Muscle_Trunk,Fetal_Stomach,H1_BMP4_Derived_Trophoblast_Cultured_Cells,HSMM_cell_derived_Skeletal_Muscle_Myotubes_Cells,HUES48_Cells,Left_Ventricle,Stomach_Smooth_Muscle,hESC_Derived_CD184+_Endoderm_Cultured_Cells,hESC_Derived_CD56+_Ectoderm_Cultured_Cells,hESC_Derived_CD56+_Mesoderm_Cultu…	ENDODERM,ESC,GI_COLON,GI_DUODENUM,GI_INTESTINE,GI_STOMACH,HEART,MUSCLE,MUSCLE_LEG,Trophoblast	.	.	ATP2B4	testis	.	T	G	G	G	G	G/G,G/G	rs16851910	AF=0.0427316	-0.342	-0.352	-0.347	0	0	0	.	.	1.057	0.06567	2b	ATP2B4,OPTC
chr1	236056568	236056569	SNC	5	TFBS,enhancer,motif_alter,openChrom,promoter	EP300,FOXA1,FOXA2,RUNX3,SPI1	.	MOTIFBR=FOXA1,FOXA2,SPI1#RARG_4#236056569#236056585#+#1#0.029779#0.858088,FOXA1,FOXA2,SPI1#RARA_3#236056569#236056587#+#1#0.005208#0.667969	.	.	Fetal_Stomach,Gastric,H1_BMP4_Derived_Mesendoderm_Cultured_Cells,Pancreas,Primary_B_cells_from_peripheral_blood,Primary_hematopoietic_stem_cells_G-CSF-mobilized_Female,Primary_hematopoietic_stem_cells_G-CSF-mobilized_Male	BLOOD,GI_STOMACH,Mesendoderm,PANCREAS	HepG2_Hepatocellular_Carcinoma_Cell_Line,Liver,Monocytes-CD14+_RO01746_Primary_Cells,Primary_neutrophils_from_peripheral_blood,Rectal_Mucosa_Donor_29	BLOOD,GI_RECTUM,LIVER	Brain_Substantia_Nigra,HUES48_Cells,Liver,Monocytes-CD14+_RO01746_Primary_Cells,Skeletal_Muscle_Female	BLOOD,BRAIN,ESC,LIVER,MUSCLE	.	.	.		.	G	T	T	T	T	T/T,T/T	.	0	-0.026	-0.058	-0.454	0.001	0.001	0.006	.	.	0.646	0.084569	.	LYST,NID1
chr10	75361302	75361303	SNP	5	TFBS,eQTL,enhancer,openChrom,promoter	EP300,FOS,JUN,JUND,ZNF263	.	.	Adipose_Subcutaneous,Adipose_Visceral,Artery_Aorta,Artery_Coronary,Artery_Tibial,Esophagus_Mucosa,Esophagus_Muscularis,Lung,Muscle_Skeletal,Nerve_Tibial,Skin_Not_Sun_Exposed_Suprapubic,Skin_Sun_Exposed_Lower_leg,Stomach,Thyroid,Whole_Blood,fibroblasts	.	Breast_variant_Human_Mammary_Epithelial_Cells_(vHMEC),Fetal_Thymus,Foreskin_Keratinocyte_Primary_Cells_skin02	BREAST,SKIN,THYMUS	A549_EtOH_0.02pct_Lung_Carcinoma_Cell_Line,Foreskin_Keratinocyte_Primary_Cells_skin03,Rectal_Mucosa_Donor_29,Rectal_Mucosa_Donor_31,Skeletal_Muscle_Female,Stomach_Mucosa,iPS-20b_Cells	GI_RECTUM,GI_STOMACH,LUNG,MUSCLE,SKIN,iPSC	Brain_Angular_Gyrus,Brain_Cingulate_Gyrus,Brain_Dorsolateral_Prefrontal_Cortex,Brain_Hippocampus_Middle,Brain_Inferior_Temporal_Lobe,Duodenum_Smooth_Muscle,Esophagus,Fetal_Intestine_Large,Fetal_Intestine_Small,Fetal_Muscle_Leg,Fetal_Muscle_Trunk,Fetal_Stomach,Gastric,H1_BMP4_Derived_Mesendoderm_Cultured_Cells,HUES48_Cells,Lung,NHEK-Epidermal_Keratinocyte_Primary_Cells,Pancreas,Rectal_Mucosa_Donor…	BRAIN,ESC,GI_COLON,GI_DUODENUM,GI_ESOPHAGUS,GI_INTESTINE,GI_RECTUM,GI_STOMACH,LUNG,MUSCLE,MUSCLE_LEG,Mesendoderm,PANCREAS,SKIN	.	.	.		.	T	C	C	C	C	C/C,C/C	rs10509345	AF=0.0632987	0.607	0.237	-0.257	0.982	0.918	0.177	745.2	2.51652e-89	5.474	0.235255	4	MYOZ1,USP54
chr10	75374734	75374735	SNP	5	TFBS,eQTL,enhancer,motif_alter,openChrom	CEBPB	.	MOTIFBR=CEBPB#ZBTB33_disc3#75374735#75374745#-#10#0.000000#0.823529	Adipose_Subcutaneous,Adipose_Visceral,Artery_Aorta,Artery_Coronary,Artery_Tibial,Esophagus_Mucosa,Esophagus_Muscularis,Lung,Muscle_Skeletal,Nerve_Tibial,Skin_Not_Sun_Exposed_Suprapubic,Skin_Sun_Exposed_Lower_leg,Stomach,Thyroid,Whole_Blood,fibroblasts	.	Fetal_Brain_Female,Fetal_Brain_Male	BRAIN	.	.	Foreskin_Melanocyte_Primary_Cells_skin03	SKIN	.	.	.		.	C	T	T	T	T	T/T,T/T	rs75228847	AF=0.0644968	0.261	0.246	0.243	0.037	0.029	0.029	.	.	2.677	0.074636	5	MYOZ1,USP54
chr10	112678090	112678091	SNP	5	TFBS,enhancer,motif_alter,openChrom,promoter	CTCF,STAT3	.	MOTIFG=RUNX1_7#112678088#112678094#-#3#7.983#3.589,RUNX2_1#112678088#112678094#-#3#7.435#3.415	.	.	Foreskin_Melanocyte_Primary_Cells_skin01,H9_Cells,Primary_Natural_Killer_cells_from_peripheral_blood	BLOOD,ESC,SKIN	A549_EtOH_0.02pct_Lung_Carcinoma_Cell_Line,Adipose_Derived_Mesenchymal_Stem_Cell_Cultured_Cells,Adipose_Nuclei,Aorta,Bone_Marrow_Derived_Cultured_Mesenchymal_Stem_Cells,Brain_Angular_Gyrus,Brain_Anterior_Caudate,Brain_Cingulate_Gyrus,Brain_Dorsolateral_Prefrontal_Cortex,Brain_Germinal_Matrix,Brain_Hippocampus_Middle,Brain_Inferior_Temporal_Lobe,Brain_Substantia_Nigra,Breast_Myoepithelial_Primary_…	ADRENAL,BLOOD,BONE,BRAIN,BREAST,CERVIX,ENDODERM,ESC,FAT,GI_COLON,GI_DUODENUM,GI_ESOPHAGUS,GI_INTESTINE,GI_RECTUM,GI_STOMACH,HEART,KIDNEY,LIVER,LUNG,MUSCLE,MUSCLE_LEG,Mesendoderm,OVARY,PANCREAS,PLACENTA,SKIN,STROMAL_CONNECTIVE,STRONAL_CONNECTIVE,THYMUS,Trophoblast,VASCULAR,iPSC	A549_EtOH_0.02pct_Lung_Carcinoma_Cell_Line,Adipose_Nuclei,Aorta,Bone_Marrow_Derived_Cultured_Mesenchymal_Stem_Cells,Brain_Angular_Gyrus,Brain_Anterior_Caudate,Brain_Cingulate_Gyrus,Brain_Dorsolateral_Prefrontal_Cortex,Brain_Hippocampus_Middle,Brain_Inferior_Temporal_Lobe,Brain_Substantia_Nigra,Colon_Smooth_Muscle,Colonic_Mucosa,Dnd41_TCell_Leukemia_Cell_Line,Duodenum_Smooth_Muscle,Esophagus,Fetal…	ADRENAL,BLOOD,BONE,BRAIN,BREAST,CERVIX,ENDODERM,ESC,FAT,GI_COLON,GI_DUODENUM,GI_ESOPHAGUS,GI_INTESTINE,GI_RECTUM,GI_STOMACH,HEART,LIVER,LUNG,MUSCLE,MUSCLE_LEG,Mesendoderm,PANCREAS,PLACENTA,SKIN,SPLEEN,STROMAL_CONNECTIVE,STRONAL_CONNECTIVE,THYMUS,Trophoblast,VASCULAR,iPSC	.	.	.		.	A	C	C	C	C	C/C,C/C	rs7923004	AF=0.905551	-0.185	-0.228	-1.159	0	0	0.013	.	.	.	0.046548	4	SHOC2
chr11	64889766	64889767	SNC	5	TFBS,TFBS_motif,enhancer,openChrom,promoter	ATF3,BCLAF1,BRCA1,CCNT2,CEBPB,CHD1,CHD2,CTCF,E2F1,E2F4,EBF1,EGR1,ELF1,ELK1,EP300,FOXA1,FOXP2,GABPA,GTF2F1,HDAC1,HMGN3,IRF1,JUND,KDM5A,KDM5B,MAX,MAZ,MTA3,MXI1,MYC,NFYA,NFYB,NR3C1,NRF1,PAX5,PHF8,PML,POLR2A,POU2F2,RBBP5,RCOR1,RELA,REST,RFX5,SAP30,SIN3A,SIN3AK20,SIX5,SMC3,SP1,SP4,SREBP1,SRF,STAT1,TAF1,TAF7,TBL1XR1,TBP,TCF12,TCF3,TCF7L2,TEAD4,UBTF,YY1,ZBTB7A,ZEB1,ZNF263	SP1,UAK42	.	.	.	Breast_variant_Human_Mammary_Epithelial_Cells_(vHMEC),Fetal_Adrenal_Gland,Fetal_Brain_Female,Fetal_Brain_Male,Fetal_Heart,Fetal_Intestine_Large,Fetal_Intestine_Small,Fetal_Kidney,Fetal_Lung,Fetal_Muscle_Leg,Fetal_Muscle_Trunk,Fetal_Stomach,Fetal_Thymus,Foreskin_Fibroblast_Primary_Cells_skin01,Foreskin_Fibroblast_Primary_Cells_skin02,Foreskin_Keratinocyte_Primary_Cells_skin02,Foreskin_Melanocyte_P…	ADRENAL,BLOOD,BRAIN,BREAST,ESC,GI_INTESTINE,GI_STOMACH,HEART,KIDNEY,LUNG,MUSCLE,MUSCLE_LEG,Mesendoderm,PANCREAS,PLACENTA,SKIN,STROMAL_CONNECTIVE,THYMUS,Trophoblast,iPSC	A549_EtOH_0.02pct_Lung_Carcinoma_Cell_Line,Adipose_Derived_Mesenchymal_Stem_Cell_Cultured_Cells,Adipose_Nuclei,Aorta,Bone_Marrow_Derived_Cultured_Mesenchymal_Stem_Cells,Brain_Angular_Gyrus,Brain_Anterior_Caudate,Brain_Cingulate_Gyrus,Brain_Dorsolateral_Prefrontal_Cortex,Brain_Germinal_Matrix,Brain_Hippocampus_Middle,Brain_Inferior_Temporal_Lobe,Brain_Substantia_Nigra,Breast_Myoepithelial_Primary_…	ADRENAL,BLOOD,BONE,BRAIN,BREAST,CERVIX,ENDODERM,ESC,FAT,GI_COLON,GI_DUODENUM,GI_ESOPHAGUS,GI_INTESTINE,GI_RECTUM,GI_STOMACH,HEART,KIDNEY,LIVER,LUNG,MUSCLE,MUSCLE_LEG,OVARY,PANCREAS,PLACENTA,SKIN,SPLEEN,STROMAL_CONNECTIVE,STRONAL_CONNECTIVE,THYMUS,Trophoblast,VASCULAR,iPSC	A549_EtOH_0.02pct_Lung_Carcinoma_Cell_Line,Adipose_Nuclei,Aorta,Bone_Marrow_Derived_Cultured_Mesenchymal_Stem_Cells,Brain_Angular_Gyrus,Brain_Anterior_Caudate,Brain_Cingulate_Gyrus,Brain_Dorsolateral_Prefrontal_Cortex,Brain_Hippocampus_Middle,Brain_Inferior_Temporal_Lobe,Brain_Substantia_Nigra,Colon_Smooth_Muscle,Colonic_Mucosa,Dnd41_TCell_Leukemia_Cell_Line,Duodenum_Smooth_Muscle,Esophagus,Fetal…	ADRENAL,BLOOD,BONE,BRAIN,BREAST,CERVIX,ENDODERM,ESC,FAT,GI_COLON,GI_DUODENUM,GI_ESOPHAGUS,GI_INTESTINE,GI_RECTUM,GI_STOMACH,HEART,LIVER,LUNG,MUSCLE,MUSCLE_LEG,PLACENTA,SKIN,SPLEEN,STROMAL_CONNECTIVE,STRONAL_CONNECTIVE,THYMUS,VASCULAR,iPSC	.	.	.		.	C	G	G	G	G	G/G,G/G	.	0	-1.11	-1.34	-1.012	0	0	0.005	.	.	7.18	0	2a	FAU,MRPL49,ZNHIT2
chr11	65203638	65203639	SNP	5	TFBS,eQTL,enhancer,openChrom,promoter	ELK4,POLR2A,TCF7L2	.	.	Nerve_Tibial	.	Gastric,H1_Derived_Mesenchymal_Stem_Cells	GI_STOMACH,STROMAL_CONNECTIVE	Adipose_Derived_Mesenchymal_Stem_Cell_Cultured_Cells,Adipose_Nuclei,Bone_Marrow_Derived_Cultured_Mesenchymal_Stem_Cells,Brain_Hippocampus_Middle,Duodenum_Smooth_Muscle,Foreskin_Fibroblast_Primary_Cells_skin01,Foreskin_Fibroblast_Primary_Cells_skin02,Foreskin_Melanocyte_Primary_Cells_skin01,Foreskin_Melanocyte_Primary_Cells_skin03,HeLa-S3_Cervical_Carcinoma_Cell_Line,Liver,Mesenchymal_Stem_Cell_De…	BLOOD,BONE,BRAIN,CERVIX,FAT,GI_DUODENUM,GI_STOMACH,LIVER,MUSCLE,SKIN,SPLEEN,STROMAL_CONNECTIVE,STRONAL_CONNECTIVE	A549_EtOH_0.02pct_Lung_Carcinoma_Cell_Line,Adipose_Nuclei,Aorta,Bone_Marrow_Derived_Cultured_Mesenchymal_Stem_Cells,Brain_Angular_Gyrus,Brain_Anterior_Caudate,Brain_Dorsolateral_Prefrontal_Cortex,Brain_Hippocampus_Middle,Brain_Inferior_Temporal_Lobe,Brain_Substantia_Nigra,Colon_Smooth_Muscle,Colonic_Mucosa,Duodenum_Smooth_Muscle,Esophagus,Fetal_Adrenal_Gland,Foreskin_Fibroblast_Primary_Cells_skin…	ADRENAL,BLOOD,BONE,BRAIN,CERVIX,ENDODERM,FAT,GI_COLON,GI_DUODENUM,GI_ESOPHAGUS,GI_INTESTINE,GI_RECTUM,GI_STOMACH,HEART,LIVER,LUNG,MUSCLE,OVARY,PLACENTA,SKIN,STROMAL_CONNECTIVE,STRONAL_CONNECTIVE,VASCULAR	.	.	.		.	A	T	T	T	T	T/T,T/T	rs112279578	AF=0.0311502	0.296	0.256	0.53	0.001	0.001	0.245	.	.	8.722	0.139865	3a	FRMD8,SCYL1
chr11	76778570	76778571	SNP	5	TFBS,enhancer,motif_alter,openChrom,promoter	BHLHE40	.	MOTIFBR=DHS#HNF4_known12#76778566#76778589#-#18#0.192308#0.230769,MOTIFG=MZF1_3#76778571#76778577#+#1#6.892#6.440	.	.	Fetal_Intestine_Small,Fetal_Lung,Fetal_Muscle_Leg,Fetal_Stomach,H1_Cells,H9_Cells,Ovary	ESC,GI_INTESTINE,GI_STOMACH,LUNG,MUSCLE_LEG,OVARY	A549_EtOH_0.02pct_Lung_Carcinoma_Cell_Line,Adipose_Derived_Mesenchymal_Stem_Cell_Cultured_Cells,Adipose_Nuclei,Bone_Marrow_Derived_Cultured_Mesenchymal_Stem_Cells,Brain_Angular_Gyrus,Brain_Anterior_Caudate,Brain_Cingulate_Gyrus,Brain_Dorsolateral_Prefrontal_Cortex,Brain_Germinal_Matrix,Brain_Hippocampus_Middle,Brain_Inferior_Temporal_Lobe,Brain_Substantia_Nigra,Breast_Myoepithelial_Primary_Cells,…	ADRENAL,BLOOD,BONE,BRAIN,BREAST,CERVIX,ENDODERM,ESC,FAT,GI_COLON,GI_DUODENUM,GI_ESOPHAGUS,GI_INTESTINE,GI_RECTUM,GI_STOMACH,HEART,KIDNEY,LIVER,LUNG,MUSCLE,MUSCLE_LEG,Mesendoderm,OVARY,PANCREAS,PLACENTA,SKIN,STROMAL_CONNECTIVE,STRONAL_CONNECTIVE,THYMUS,Trophoblast,VASCULAR,iPSC	Adipose_Nuclei,Brain_Anterior_Caudate,Brain_Cingulate_Gyrus,Brain_Hippocampus_Middle,Brain_Inferior_Temporal_Lobe,Brain_Substantia_Nigra,Colon_Smooth_Muscle,Colonic_Mucosa,Dnd41_TCell_Leukemia_Cell_Line,Duodenum_Smooth_Muscle,Fetal_Adrenal_Gland,Fetal_Intestine_Large,Fetal_Intestine_Small,Fetal_Muscle_Leg,Fetal_Stomach,Fetal_Thymus,Foreskin_Fibroblast_Primary_Cells_skin01,Foreskin_Fibroblast_Prim…	ADRENAL,BLOOD,BONE,BRAIN,ENDODERM,ESC,FAT,GI_COLON,GI_DUODENUM,GI_INTESTINE,GI_RECTUM,GI_STOMACH,HEART,LIVER,LUNG,MUSCLE_LEG,Mesendoderm,SKIN,STROMAL_CONNECTIVE,THYMUS,iPSC	.	.	.		.	C	T	T	T	T	T/T,T/T	rs552456082	AF=0.0091853	0.06	0.019	0.457	0.003	0.003	0.006	.	.	8.212	0.166803	2b	CAPN5
chr11	76778731	76778732	SNP	5	TFBS,enhancer,motif_alter,openChrom,promoter	BHLHE40	.	MOTIFG=MZF1_3#76778727#76778733#+#6#6.892#4.799	.	.	Fetal_Kidney,H1_Derived_Neuronal_Progenitor_Cultured_Cells,Primary_B_cells_from_peripheral_blood	BLOOD,BRAIN,KIDNEY	A549_EtOH_0.02pct_Lung_Carcinoma_Cell_Line,Adipose_Derived_Mesenchymal_Stem_Cell_Cultured_Cells,Adipose_Nuclei,Bone_Marrow_Derived_Cultured_Mesenchymal_Stem_Cells,Brain_Angular_Gyrus,Brain_Anterior_Caudate,Brain_Cingulate_Gyrus,Brain_Dorsolateral_Prefrontal_Cortex,Brain_Germinal_Matrix,Brain_Hippocampus_Middle,Brain_Inferior_Temporal_Lobe,Brain_Substantia_Nigra,Breast_Myoepithelial_Primary_Cells,…	ADRENAL,BLOOD,BONE,BRAIN,BREAST,ENDODERM,ESC,FAT,GI_COLON,GI_DUODENUM,GI_ESOPHAGUS,GI_INTESTINE,GI_RECTUM,GI_STOMACH,HEART,KIDNEY,LIVER,LUNG,MUSCLE,MUSCLE_LEG,PANCREAS,PLACENTA,SKIN,STROMAL_CONNECTIVE,STRONAL_CONNECTIVE,THYMUS,VASCULAR,iPSC	Brain_Anterior_Caudate,Brain_Hippocampus_Middle,Brain_Inferior_Temporal_Lobe,Colon_Smooth_Muscle,Colonic_Mucosa,Dnd41_TCell_Leukemia_Cell_Line,Fetal_Intestine_Large,Fetal_Intestine_Small,Fetal_Muscle_Leg,Fetal_Stomach,Fetal_Thymus,Foreskin_Fibroblast_Primary_Cells_skin01,H1_Cells,IMR90_fetal_lung_fibroblasts_Cell_Line,Liver,NHLF_Lung_Fibroblast_Primary_Cells,Primary_T_CD8+_naive_cells_from_periph…	BLOOD,BRAIN,ENDODERM,ESC,GI_COLON,GI_INTESTINE,GI_RECTUM,GI_STOMACH,HEART,LIVER,LUNG,MUSCLE_LEG,SKIN,THYMUS,iPSC	.	.	.		.	G	A	A	A	A	A/A,A/A	rs116774380	AF=0.00938498	-0.511	-0.538	-0.338	0	0	0.002	.	.	4.776	0.166803	2b	CAPN5
chr11	102261548	102261549	SNP	5	TFBS,TFBS_motif,eQTL,enhancer,openChrom	CBX3,CTCF,ELF1,FOXA1,GATA2,GATA3,JUND,MAFF,MAFK,MAX,MAZ,MYC,POLR2A,RAD21,RCOR1,REST,SMC3,TAL1,TBL1XR1,TEAD4,WRNIP1,YY1,ZNF143	v-Maf	.	Muscle_Skeletal	.	Breast_variant_Human_Mammary_Epithelial_Cells_(vHMEC),Fetal_Adrenal_Gland,Fetal_Brain_Female,Fetal_Heart,Fetal_Intestine_Large,Fetal_Intestine_Small,Fetal_Kidney,Fetal_Lung,Fetal_Muscle_Leg,Fetal_Muscle_Trunk,Fetal_Stomach,Fetal_Thymus,Foreskin_Fibroblast_Primary_Cells_skin01,Foreskin_Fibroblast_Primary_Cells_skin02,Foreskin_Keratinocyte_Primary_Cells_skin02,Foreskin_Melanocyte_Primary_Cells_skin…	ADRENAL,BLOOD,BRAIN,BREAST,ESC,GI_INTESTINE,GI_STOMACH,HEART,KIDNEY,LUNG,MUSCLE,MUSCLE_LEG,Mesendoderm,OVARY,PANCREAS,PLACENTA,SKIN,STROMAL_CONNECTIVE,THYMUS,Trophoblast,iPSC	.	.	Brain_Anterior_Caudate,Brain_Cingulate_Gyrus,Brain_Hippocampus_Middle,Brain_Inferior_Temporal_Lobe,Lung,Primary_T_helper_cells_PMA-I_stimulated,Primary_T_helper_naive_cells_from_peripheral_blood	BLOOD,BRAIN,LUNG	.	.	.		.	G	A	A	A	A	A/A,A/A	rs12291114	AF=0.0323482	0.409	0.384	0.379	0.004	0.004	0.004	.	.	1.879	0	4	BIRC2,TMEM123
chr11	102281613	102281614	SNP	5	TFBS,eQTL,enhancer,motif_alter,promoter	GATA2,KAP1	.	MOTIFBR=GATA2#HMGA1_2#102281606#102281621#+#9#0.080000#0.920000,GATA2#MAF_known1#102281607#102281623#-#9#0.000000#1.000000	Muscle_Skeletal	.	.	.	Brain_Substantia_Nigra	BRAIN	Mesenchymal_Stem_Cell_Derived_Chondrocyte_Cultured_Cells,Primary_T_helper_cells_PMA-I_stimulated,Primary_T_regulatory_cells_from_peripheral_blood,hESC_Derived_CD56+_Mesoderm_Cultured_Cells	BLOOD,ENDODERM,STROMAL_CONNECTIVE	.	.	.		.	T	C	C	C	NA	C/C,C/C	rs12277747	AF=0.0453275	-0.176	-0.179	0.402	0	0	0.058	.	.	2.768	0.106106	5	BIRC2,TMEM123
chr12	65004595	65004596	SNP	5	TFBS,enhancer,motif_alter,openChrom,promoter	CCNT2,CHD1,E2F1,HDAC1,KDM5B,MAX,MXI1,MYC,PHF8,POLR2A,RBBP5,REST,SAP30,SIN3A,SIN3AK20,SMARCB1,TAF1,TFAP2A,TFAP2C,UBTF,ZEB1	.	MOTIFBR=E2F1,MAX,TFAP2A,TFAP2C#EP300_disc9#65004579#65004596#-#0#0.000000#0.666667,E2F1,MAX,TFAP2A,TFAP2C#YY1_disc4#65004581#65004596#-#0#0.000000#0.343877,E2F1,MAX,TFAP2A,TFAP2C#BCL_disc9#65004583#65004597#-#1#0.000000#0.551479,E2F1,MAX,TFAP2A,TFAP2C#RAD21_disc10#65004585#65004596#-#0#0.000000#0.464610,E2F1,MAX,TFAP2A,TFAP2C#SMC3_disc3#65004585#65004596#-#0#0.000000#0.500000,E2F1,MAX,TFAP2A,TFAP…	.	.	Fetal_Stomach,Fetal_Thymus,iPS_DF_19.11_Cells	GI_STOMACH,THYMUS,iPSC	A549_EtOH_0.02pct_Lung_Carcinoma_Cell_Line,Adipose_Derived_Mesenchymal_Stem_Cell_Cultured_Cells,Adipose_Nuclei,Aorta,Bone_Marrow_Derived_Cultured_Mesenchymal_Stem_Cells,Brain_Angular_Gyrus,Brain_Anterior_Caudate,Brain_Cingulate_Gyrus,Brain_Dorsolateral_Prefrontal_Cortex,Brain_Germinal_Matrix,Brain_Hippocampus_Middle,Brain_Inferior_Temporal_Lobe,Brain_Substantia_Nigra,Breast_Myoepithelial_Primary_…	ADRENAL,BLOOD,BONE,BRAIN,BREAST,CERVIX,ENDODERM,ESC,FAT,GI_COLON,GI_DUODENUM,GI_ESOPHAGUS,GI_INTESTINE,GI_RECTUM,GI_STOMACH,HEART,KIDNEY,LIVER,LUNG,MUSCLE,MUSCLE_LEG,Mesendoderm,OVARY,PANCREAS,PLACENTA,SKIN,SPLEEN,STROMAL_CONNECTIVE,STRONAL_CONNECTIVE,THYMUS,Trophoblast,VASCULAR,iPSC	A549_EtOH_0.02pct_Lung_Carcinoma_Cell_Line,Adipose_Nuclei,Aorta,Bone_Marrow_Derived_Cultured_Mesenchymal_Stem_Cells,Brain_Angular_Gyrus,Brain_Anterior_Caudate,Brain_Dorsolateral_Prefrontal_Cortex,Brain_Hippocampus_Middle,Brain_Substantia_Nigra,Colon_Smooth_Muscle,Colonic_Mucosa,Dnd41_TCell_Leukemia_Cell_Line,Duodenum_Smooth_Muscle,Esophagus,Fetal_Adrenal_Gland,Fetal_Intestine_Large,Fetal_Intestin…	ADRENAL,BLOOD,BONE,BRAIN,BREAST,CERVIX,ENDODERM,ESC,FAT,GI_COLON,GI_DUODENUM,GI_ESOPHAGUS,GI_INTESTINE,GI_RECTUM,GI_STOMACH,HEART,LIVER,LUNG,MUSCLE,MUSCLE_LEG,Mesendoderm,PANCREAS,PLACENTA,SKIN,SPLEEN,STROMAL_CONNECTIVE,STRONAL_CONNECTIVE,THYMUS,Trophoblast,VASCULAR,iPSC	.	.	.		.	C	A	A	A	A	A/A,A/A	rs187757150	AF=0.00858626	0.065	-0.065	0.094	0.027	0.004	0.452	.	.	13.08	0.046548	.	RASSF3
chr13	61068532	61068533	SNP	5	DE_gene,TFBS,eQTL,enhancer,promoter	BATF,BCL11A,MEF2A,NFIC,RUNX3	.	.	Lung	.	.	.	iPS-20b_Cells	iPSC	HUES6_Cells	ESC	.	.	TDRD3	testis	.	C	T	T	T	T	T/T,T/T	rs41293432	AF=0.0233626	0.858	1.095	0.525	0.062	0.012	0.002	.	.	5.025	0.093295	4	PCDH20,TDRD3
chr13	102985877	102985878	SNP	5	TFBS,TFBS_motif,motif_alter,openChrom,promoter	CEBPB	CEBPB	MOTIFBR=DHS#GMEB1_1#102985869#102985886#+#10#0.000943#0.009202	.	.	Foreskin_Fibroblast_Primary_Cells_skin01,Foreskin_Fibroblast_Primary_Cells_skin02,H1_Derived_Mesenchymal_Stem_Cells	SKIN,STROMAL_CONNECTIVE	iPS-15b_Cells	iPSC	.	.	.	.	.		.	G	A	A	A	A	A/A,A/A	rs114057615	AF=0.00898562	-0.551	-0.603	0.374	0	0	0.006	3029.5	6.95947e-314	0.027	0.074388	5	FGF14,ITGBL1
chr14	102432353	102432354	SNP	5	TFBS,enhancer,motif_alter,openChrom,promoter	TAF1	.	MOTIFG=FOXM1_1#102432354#102432363#-#9#8.688#4.294	.	.	Fetal_Muscle_Trunk,Foreskin_Fibroblast_Primary_Cells_skin01,H1_BMP4_Derived_Mesendoderm_Cultured_Cells,H1_Derived_Mesenchymal_Stem_Cells	MUSCLE,Mesendoderm,SKIN,STROMAL_CONNECTIVE	A549_EtOH_0.02pct_Lung_Carcinoma_Cell_Line,Adipose_Derived_Mesenchymal_Stem_Cell_Cultured_Cells,Adipose_Nuclei,Aorta,Bone_Marrow_Derived_Cultured_Mesenchymal_Stem_Cells,Brain_Angular_Gyrus,Brain_Anterior_Caudate,Brain_Cingulate_Gyrus,Brain_Dorsolateral_Prefrontal_Cortex,Brain_Germinal_Matrix,Brain_Hippocampus_Middle,Brain_Inferior_Temporal_Lobe,Brain_Substantia_Nigra,Breast_Myoepithelial_Primary_…	ADRENAL,BLOOD,BONE,BRAIN,BREAST,CERVIX,ENDODERM,ESC,FAT,GI_COLON,GI_DUODENUM,GI_INTESTINE,GI_RECTUM,GI_STOMACH,HEART,KIDNEY,LIVER,LUNG,MUSCLE,MUSCLE_LEG,Mesendoderm,OVARY,PANCREAS,PLACENTA,SKIN,STROMAL_CONNECTIVE,STRONAL_CONNECTIVE,THYMUS,Trophoblast,VASCULAR,iPSC	A549_EtOH_0.02pct_Lung_Carcinoma_Cell_Line,Adipose_Nuclei,Aorta,Bone_Marrow_Derived_Cultured_Mesenchymal_Stem_Cells,Brain_Angular_Gyrus,Brain_Anterior_Caudate,Brain_Cingulate_Gyrus,Brain_Dorsolateral_Prefrontal_Cortex,Brain_Hippocampus_Middle,Brain_Inferior_Temporal_Lobe,Brain_Substantia_Nigra,Dnd41_TCell_Leukemia_Cell_Line,Duodenum_Smooth_Muscle,Fetal_Adrenal_Gland,Fetal_Intestine_Large,Fetal_In…	ADRENAL,BLOOD,BONE,BRAIN,BREAST,CERVIX,ENDODERM,ESC,FAT,GI_COLON,GI_DUODENUM,GI_INTESTINE,GI_RECTUM,GI_STOMACH,HEART,LIVER,LUNG,MUSCLE,MUSCLE_LEG,PANCREAS,PLACENTA,SKIN,SPLEEN,STROMAL_CONNECTIVE,STRONAL_CONNECTIVE,VASCULAR	.	.	.		.	G	A	A	A	A	A/A,A/A	rs17511879	AF=0.0171725	-0.449	-0.523	-0.302	0.004	0.003	0.002	.	.	5.488	0.085055	5	DYNC1H1,HSP90AA1
chr15	60667717	60667718	SNP	5	CNS,TFBS,enhancer,openChrom,promoter	POLR2A	.	.	.	CNS	Fetal_Muscle_Leg	MUSCLE_LEG	A549_EtOH_0.02pct_Lung_Carcinoma_Cell_Line,Adipose_Derived_Mesenchymal_Stem_Cell_Cultured_Cells,Bone_Marrow_Derived_Cultured_Mesenchymal_Stem_Cells,Duodenum_Smooth_Muscle,Foreskin_Fibroblast_Primary_Cells_skin01,Mesenchymal_Stem_Cell_Derived_Adipocyte_Cultured_Cells,Mesenchymal_Stem_Cell_Derived_Chondrocyte_Cultured_Cells,hESC_Derived_CD184+_Endoderm_Cultured_Cells	ENDODERM,FAT,GI_DUODENUM,LUNG,SKIN,STROMAL_CONNECTIVE,STRONAL_CONNECTIVE	A549_EtOH_0.02pct_Lung_Carcinoma_Cell_Line,Adipose_Nuclei,Aorta,Bone_Marrow_Derived_Cultured_Mesenchymal_Stem_Cells,Brain_Hippocampus_Middle,Duodenum_Smooth_Muscle,Esophagus,Fetal_Muscle_Leg,Fetal_Muscle_Trunk,Foreskin_Fibroblast_Primary_Cells_skin01,Foreskin_Fibroblast_Primary_Cells_skin02,H1_Derived_Mesenchymal_Stem_Cells,HMEC_Mammary_Epithelial_Primary_Cells,HSMM_Skeletal_Muscle_Myoblasts_Cell…	BONE,BRAIN,BREAST,CERVIX,ENDODERM,ESC,FAT,GI_DUODENUM,GI_ESOPHAGUS,GI_RECTUM,HEART,LIVER,LUNG,MUSCLE,MUSCLE_LEG,PANCREAS,SKIN,STROMAL_CONNECTIVE,STRONAL_CONNECTIVE,VASCULAR	.	.	.		.	C	A	A	A	A	A/A,A/A	rs566920776	AF=0.000399361	0.36	0.424	-0.295	0.187	0.278	0.46	1533.1	2.84277e-221	10.39	0.088506	.	ANXA2,FOXB1
chr15	68900815	68900816	SNP	5	DE_gene,eRNA,enhancer,openChrom,promoter	.	.	.	.	.	Fetal_Adrenal_Gland,Fetal_Brain_Female,Fetal_Kidney,Fetal_Lung,Fetal_Muscle_Leg,Fetal_Muscle_Trunk,Fetal_Stomach,Foreskin_Fibroblast_Primary_Cells_skin02,Gastric,H1_Derived_Mesenchymal_Stem_Cells,IMR90_fetal_lung_fibroblasts_Cell_Line,Ovary	ADRENAL,BRAIN,GI_STOMACH,KIDNEY,LUNG,MUSCLE,MUSCLE_LEG,OVARY,SKIN,STROMAL_CONNECTIVE	Brain_Cingulate_Gyrus,Fetal_Heart,Foreskin_Fibroblast_Primary_Cells_skin02,Osteoblast_Primary_Cells,Stomach_Smooth_Muscle,iPS-18_Cells	BONE,BRAIN,GI_STOMACH,HEART,SKIN,iPSC	Adipose_Nuclei,Aorta,Bone_Marrow_Derived_Cultured_Mesenchymal_Stem_Cells,Brain_Angular_Gyrus,Brain_Anterior_Caudate,Brain_Cingulate_Gyrus,Brain_Dorsolateral_Prefrontal_Cortex,Brain_Hippocampus_Middle,Brain_Inferior_Temporal_Lobe,Brain_Substantia_Nigra,Fetal_Adrenal_Gland,Fetal_Intestine_Small,Fetal_Stomach,Foreskin_Fibroblast_Primary_Cells_skin01,Foreskin_Melanocyte_Primary_Cells_skin01,H1_Cells,…	ADRENAL,BONE,BRAIN,ENDODERM,ESC,FAT,GI_COLON,GI_INTESTINE,GI_RECTUM,GI_STOMACH,HEART,LUNG,MUSCLE,OVARY,SKIN,STRONAL_CONNECTIVE,VASCULAR,iPSC	skeletal_muscle_cell	.	CORO2B	testis	.	T	C	C	C	C	C/C,C/C	rs114701273	AF=0.029353	0.039	0.054	0.557	0.152	0.125	0.72	.	.	11.81	0.126639	5	ANP32A,CORO2B
chr15	68900981	68900982	SNP	5	DE_gene,eRNA,enhancer,openChrom,promoter	.	.	.	.	.	H1_BMP4_Derived_Mesendoderm_Cultured_Cells,Pancreas,iPS_DF_6.9_Cells	Mesendoderm,PANCREAS,iPSC	ES-UCSF4_Cells,Foreskin_Fibroblast_Primary_Cells_skin02,iPS-18_Cells	ESC,SKIN,iPSC	Adipose_Nuclei,Bone_Marrow_Derived_Cultured_Mesenchymal_Stem_Cells,Brain_Angular_Gyrus,Brain_Anterior_Caudate,Brain_Cingulate_Gyrus,Brain_Dorsolateral_Prefrontal_Cortex,Brain_Hippocampus_Middle,Brain_Inferior_Temporal_Lobe,Brain_Substantia_Nigra,Fetal_Adrenal_Gland,Fetal_Intestine_Small,Fetal_Muscle_Leg,Fetal_Stomach,H1_Cells,IMR90_fetal_lung_fibroblasts_Cell_Line,Left_Ventricle,Lung,Mesenchymal_…	ADRENAL,BONE,BRAIN,ENDODERM,ESC,FAT,GI_COLON,GI_INTESTINE,GI_RECTUM,GI_STOMACH,HEART,LUNG,MUSCLE,MUSCLE_LEG,OVARY,STROMAL_CONNECTIVE,STRONAL_CONNECTIVE,iPSC	skeletal_muscle_cell	.	CORO2B	testis	.	G	A	A	A	A	A/A,A/A	rs74969906	AF=0.029353	-0.44	-0.488	-0.483	0.001	0.001	0.203	.	.	6.182	0.158681	5	ANP32A,CORO2B
chr15	68913126	68913127	SNP	5	DE_gene,TFBS,enhancer,openChrom,promoter	FOXP2,ZNF263	.	.	.	.	Pancreas	PANCREAS	Brain_Cingulate_Gyrus,Foreskin_Fibroblast_Primary_Cells_skin01,Stomach_Smooth_Muscle	BRAIN,GI_STOMACH,SKIN	Adipose_Nuclei,Aorta,Bone_Marrow_Derived_Cultured_Mesenchymal_Stem_Cells,Brain_Angular_Gyrus,Brain_Anterior_Caudate,Brain_Cingulate_Gyrus,Brain_Dorsolateral_Prefrontal_Cortex,Brain_Hippocampus_Middle,Brain_Inferior_Temporal_Lobe,Brain_Substantia_Nigra,Duodenum_Smooth_Muscle,Fetal_Intestine_Large,Fetal_Muscle_Leg,Fetal_Muscle_Trunk,Fetal_Stomach,H1_Derived_Mesenchymal_Stem_Cells,HSMM_cell_derived_…	BONE,BRAIN,ENDODERM,FAT,GI_COLON,GI_DUODENUM,GI_INTESTINE,GI_RECTUM,GI_STOMACH,HEART,LUNG,MUSCLE,MUSCLE_LEG,OVARY,STROMAL_CONNECTIVE,STRONAL_CONNECTIVE,VASCULAR	.	.	CORO2B	testis	.	T	C	C	C	C	C/C,C/C	rs532774793	AF=0.00219649	-1.19	-1.177	-0.359	0.001	0.004	0.032	.	.	1.037	0.056701	.	ANP32A,CORO2B
chr16	30934308	30934309	SNP	5	TFBS,enhancer,motif_alter,openChrom,promoter	CHD1,E2F1,EBF1,FOSL2,HDAC8,KAP1,KDM5A,MAX,MAZ,MTA3,MYBL2,MYC,NFIC,PHF8,PML,POLR2A,RELA,REST,SIN3A,SIN3AK20,SIX5,STAT5A,TAF1,TBP,USF1,USF2,YY1,ZNF143	.	MOTIFBR=EBF1,MAX,NFKB1,SIX5,TBP,TRIM28,USF1,USF2,YY1,ZBTB7A,ZNF143#CDX1_1#30934300#30934316#+#10#0.001939#0.251154,EBF1,MAX,NFKB1,SIX5,TBP,TRIM28,USF1,USF2,YY1,ZBTB7A,ZNF143#HOXA9_1#30934301#30934318#+#9#0.003697#0.358584	.	.	Fetal_Intestine_Large,Fetal_Muscle_Leg,Foreskin_Keratinocyte_Primary_Cells_skin02,H1_BMP4_Derived_Mesendoderm_Cultured_Cells,H1_BMP4_Derived_Trophoblast_Cultured_Cells,H1_Derived_Neuronal_Progenitor_Cultured_Cells,H9_Cells,Primary_T_cells_from_peripheral_blood	BLOOD,BRAIN,ESC,GI_INTESTINE,MUSCLE_LEG,Mesendoderm,SKIN,Trophoblast	A549_EtOH_0.02pct_Lung_Carcinoma_Cell_Line,Adipose_Derived_Mesenchymal_Stem_Cell_Cultured_Cells,Adipose_Nuclei,Aorta,Bone_Marrow_Derived_Cultured_Mesenchymal_Stem_Cells,Brain_Angular_Gyrus,Brain_Anterior_Caudate,Brain_Cingulate_Gyrus,Brain_Dorsolateral_Prefrontal_Cortex,Brain_Germinal_Matrix,Brain_Hippocampus_Middle,Brain_Inferior_Temporal_Lobe,Brain_Substantia_Nigra,Breast_Myoepithelial_Primary_…	ADRENAL,BLOOD,BONE,BRAIN,BREAST,CERVIX,ENDODERM,ESC,FAT,GI_COLON,GI_DUODENUM,GI_ESOPHAGUS,GI_INTESTINE,GI_RECTUM,GI_STOMACH,HEART,KIDNEY,LIVER,LUNG,MUSCLE,MUSCLE_LEG,Mesendoderm,OVARY,PANCREAS,PLACENTA,SKIN,SPLEEN,STROMAL_CONNECTIVE,STRONAL_CONNECTIVE,THYMUS,Trophoblast,VASCULAR,iPSC	A549_EtOH_0.02pct_Lung_Carcinoma_Cell_Line,Adipose_Nuclei,Aorta,Bone_Marrow_Derived_Cultured_Mesenchymal_Stem_Cells,Brain_Angular_Gyrus,Brain_Anterior_Caudate,Brain_Cingulate_Gyrus,Brain_Dorsolateral_Prefrontal_Cortex,Brain_Hippocampus_Middle,Brain_Inferior_Temporal_Lobe,Brain_Substantia_Nigra,Colon_Smooth_Muscle,Colonic_Mucosa,Dnd41_TCell_Leukemia_Cell_Line,Duodenum_Smooth_Muscle,Esophagus,Fetal…	ADRENAL,BLOOD,BONE,BRAIN,BREAST,CERVIX,ENDODERM,ESC,FAT,GI_COLON,GI_DUODENUM,GI_ESOPHAGUS,GI_INTESTINE,GI_RECTUM,GI_STOMACH,HEART,LIVER,LUNG,MUSCLE,MUSCLE_LEG,Mesendoderm,PANCREAS,PLACENTA,SKIN,SPLEEN,STROMAL_CONNECTIVE,STRONAL_CONNECTIVE,THYMUS,Trophoblast,VASCULAR,iPSC	.	.	.		.	T	G	G	G	G	G/G,G/G	rs185275374	AF=0.000998403	0.048	0.189	0.457	0.931	0.977	0.798	4469.1	0	10.52	0.08998	.	FBXL19
chr16	75026014	75026015	SNP	5	DE_gene,TFBS,enhancer,motif_alter,openChrom	GATA1,GATA2,POLR2A,RCOR1,RXRA,TAF1,TAL1,TEAD4	.	MOTIFBR=DHS,TAF1,TAL1#RXRA_known7#75026010#75026025#-#10#0.010417#0.158565,MOTIFG=TEAD1_1#75026014#75026020#-#5#7.094#2.700	.	.	Fetal_Intestine_Large,Ovary,Primary_hematopoietic_stem_cells_G-CSF-mobilized_Male	BLOOD,GI_INTESTINE,OVARY	.	.	Adipose_Nuclei,Brain_Angular_Gyrus,Brain_Anterior_Caudate,Brain_Cingulate_Gyrus,Brain_Dorsolateral_Prefrontal_Cortex,Brain_Hippocampus_Middle,Brain_Inferior_Temporal_Lobe,Brain_Substantia_Nigra,Colonic_Mucosa,Duodenum_Smooth_Muscle,Fetal_Adrenal_Gland,Fetal_Intestine_Large,Fetal_Intestine_Small,Fetal_Stomach,Gastric,H1_Derived_Mesenchymal_Stem_Cells,HUES48_Cells,HepG2_Hepatocellular_Carcinoma_Cel…	ADRENAL,BLOOD,BRAIN,ESC,FAT,GI_COLON,GI_DUODENUM,GI_INTESTINE,GI_RECTUM,GI_STOMACH,HEART,LIVER,LUNG,OVARY,PANCREAS,STROMAL_CONNECTIVE,THYMUS	.	.	FA2H	testis	.	C	A	A	A	A	A/A,A/A	rs180936297	AF=0.00139776	-0.207	-0.269	0.398	0	0	0.003	.	.	7.788	0.074388	.	FA2H,ZNRF1
chr16	75096192	75096193	SNP	5	DE_gene,TFBS,enhancer,openChrom,promoter	MAX	.	.	.	.	Fetal_Adrenal_Gland,Fetal_Heart,Fetal_Muscle_Trunk,Foreskin_Melanocyte_Primary_Cells_skin01	ADRENAL,HEART,MUSCLE,SKIN	Dnd41_TCell_Leukemia_Cell_Line,Duodenum_Smooth_Muscle,Esophagus,Fetal_Lung,K562_Leukemia_Cells,Primary_hematopoietic_stem_cells_G-CSF-mobilized_Male,Skeletal_Muscle_Female,Skeletal_Muscle_Male,Stomach_Smooth_Muscle	BLOOD,GI_DUODENUM,GI_ESOPHAGUS,GI_STOMACH,LUNG,MUSCLE	Colon_Smooth_Muscle,Dnd41_TCell_Leukemia_Cell_Line,Duodenum_Smooth_Muscle,Esophagus,Fetal_Muscle_Leg,Fetal_Stomach,Fetal_Thymus,Foreskin_Fibroblast_Primary_Cells_skin01,Foreskin_Keratinocyte_Primary_Cells_skin03,Gastric,H1_BMP4_Derived_Trophoblast_Cultured_Cells,IMR90_fetal_lung_fibroblasts_Cell_Line,K562_Leukemia_Cells,Left_Ventricle,Liver,Lung,NHLF_Lung_Fibroblast_Primary_Cells,Placenta,Primary…	BLOOD,ENDODERM,GI_COLON,GI_DUODENUM,GI_ESOPHAGUS,GI_INTESTINE,GI_RECTUM,GI_STOMACH,HEART,LIVER,LUNG,MUSCLE,MUSCLE_LEG,PLACENTA,SKIN,THYMUS,Trophoblast,iPSC	.	.	LDHD	kidney	.	C	T	T	T	T	T/T,T/T	rs372075401	AF=0.000998403	-1.56	-1.748	-0.285	0	0	0.002	.	.	5.04	0.087844	.	LDHD,ZNRF1
chr17	45221196	45221197	SNC	5	DE_gene,TFBS,enhancer,openChrom,promoter	BRF2,REST,SRF	.	.	.	.	Breast_variant_Human_Mammary_Epithelial_Cells_(vHMEC),Fetal_Adrenal_Gland,Fetal_Brain_Female,Fetal_Brain_Male,Fetal_Heart,Fetal_Intestine_Large,Fetal_Intestine_Small,Fetal_Kidney,Fetal_Lung,Fetal_Muscle_Leg,Fetal_Stomach,Fetal_Thymus,Foreskin_Fibroblast_Primary_Cells_skin01,Foreskin_Keratinocyte_Primary_Cells_skin02,Foreskin_Melanocyte_Primary_Cells_skin01,H1_BMP4_Derived_Mesendoderm_Cultured_Cel…	ADRENAL,BLOOD,BRAIN,BREAST,GI_INTESTINE,GI_STOMACH,HEART,KIDNEY,LUNG,MUSCLE,MUSCLE_LEG,Mesendoderm,PANCREAS,PLACENTA,SKIN,THYMUS,Trophoblast,iPSC	ES-UCSF4_Cells,Gastric	ESC,GI_STOMACH	Gastric,Ovary	GI_STOMACH,OVARY	.	.	CDC27	testis	.	G	T	T	T	T	T/T,T/T	.	0	2.493	2.13	0.375	0.132	0.019	0.07	42.4	4.63521e-08	5.329	0	.	CDC27,RPRML
chr17	45267984	45267985	SNP	5	DE_gene,TFBS,enhancer,openChrom,promoter	HDAC8	.	.	.	.	Fetal_Muscle_Trunk	MUSCLE	Breast_variant_Human_Mammary_Epithelial_Cells_(vHMEC)	BREAST	Fetal_Muscle_Trunk,HSMM_cell_derived_Skeletal_Muscle_Myotubes_Cells,K562_Leukemia_Cells,Primary_T_CD8+_memory_cells_from_peripheral_blood,Primary_T_helper_17_cells_PMA-I_stimulated	BLOOD,MUSCLE	.	.	CDC27	testis	.	G	C	C	C	C	C/C,C/C	rs11570441	AF=0.0563099	0.266	0.28	0.55	0	0	0.036	.	.	1.523	0.080754	.	CDC27
chr17	45291027	45291028	SNP	5	DE_gene,TFBS,enhancer,openChrom,promoter	BHLHE40,EP300,GATA2,MAX,MAZ,MYC,RCOR1,SPI1,TAL1,TEAD4,YY1,ZNF263	.	.	.	.	Fetal_Heart,Primary_hematopoietic_stem_cells_G-CSF-mobilized_Female,Primary_hematopoietic_stem_cells_G-CSF-mobilized_Male	BLOOD,HEART	Fetal_Heart,K562_Leukemia_Cells	BLOOD,HEART	Right_Atrium	HEART	.	.	ITGB3	testis	.	A	G	G	G	T	G/G,G/G	rs114776758	AF=0.0225639	-0.459	-0.517	-2.497	0	0	0	.	.	0.177	0.074636	4	ITGB3,MYL4
chr17	45307247	45307248	SNC	5	DE_gene,TFBS,enhancer,openChrom,promoter	ATF3,BATF,BCLAF1,BHLHE40,CBX3,CEBPB,CEBPD,CHD2,CREB1,CTCF,E2F6,EGR1,ELF1,ELK1,EP300,FOS,FOXM1,FOXP2,GATA2,GTF2F1,HDAC8,IRF4,JUND,KAP1,MAFK,MAX,MAZ,MBD4,MEF2A,MXI1,MYBL2,MYC,PAX5,POLR2A,POU2F2,RAD21,RCOR1,RELA,REST,RFX5,RUNX3,RXRA,SIN3A,SMC3,SP1,SRF,STAT3,TBL1XR1,TBP,TCF7L2,TEAD4,USF1,USF2,WRNIP1,YY1,ZNF143,ZNF263	.	.	.	.	Fetal_Adrenal_Gland,Fetal_Brain_Female,Fetal_Brain_Male,Fetal_Intestine_Large,Fetal_Intestine_Small,Fetal_Kidney,Fetal_Lung,Fetal_Muscle_Leg,Fetal_Muscle_Trunk,Fetal_Stomach,Fetal_Thymus,Foreskin_Melanocyte_Primary_Cells_skin01,Gastric,H1_BMP4_Derived_Mesendoderm_Cultured_Cells,H1_BMP4_Derived_Trophoblast_Cultured_Cells,H1_Cells,H1_Derived_Neuronal_Progenitor_Cultured_Cells,H9_Cells,IMR90_fetal_l…	ADRENAL,BLOOD,BRAIN,ESC,GI_INTESTINE,GI_STOMACH,KIDNEY,LUNG,MUSCLE,MUSCLE_LEG,Mesendoderm,OVARY,PANCREAS,PLACENTA,SKIN,THYMUS,Trophoblast,iPSC	Adipose_Derived_Mesenchymal_Stem_Cell_Cultured_Cells,Adipose_Nuclei,Brain_Angular_Gyrus,Brain_Anterior_Caudate,Brain_Hippocampus_Middle,Brain_Inferior_Temporal_Lobe,Colon_Smooth_Muscle,Dnd41_TCell_Leukemia_Cell_Line,Duodenum_Smooth_Muscle,Fetal_Heart,Fetal_Lung,Foreskin_Fibroblast_Primary_Cells_skin01,Foreskin_Fibroblast_Primary_Cells_skin02,Foreskin_Keratinocyte_Primary_Cells_skin03,Foreskin_Mel…	BLOOD,BONE,BRAIN,FAT,GI_COLON,GI_DUODENUM,GI_RECTUM,GI_STOMACH,HEART,LIVER,LUNG,MUSCLE,SKIN,STROMAL_CONNECTIVE,STRONAL_CONNECTIVE	Adipose_Nuclei,Colon_Smooth_Muscle,Duodenum_Smooth_Muscle,Fetal_Stomach,Foreskin_Fibroblast_Primary_Cells_skin01,Foreskin_Fibroblast_Primary_Cells_skin02,HUVEC_Umbilical_Vein_Endothelial_Primary_Cells,HeLa-S3_Cervical_Carcinoma_Cell_Line,IMR90_fetal_lung_fibroblasts_Cell_Line,Liver,NHLF_Lung_Fibroblast_Primary_Cells,Osteoblast_Primary_Cells,Rectal_Mucosa_Donor_29,Rectal_Mucosa_Donor_31,Rectal_Smo…	BONE,CERVIX,FAT,GI_COLON,GI_DUODENUM,GI_INTESTINE,GI_RECTUM,GI_STOMACH,LIVER,LUNG,SKIN,VASCULAR	.	.	ITGB3	testis	.	G	T	T	T	T	T/T,T/T	.	0	-1.233	-1.314	-0.385	0	0	0.012	.	.	2.173	0.235255	.	ITGB3,MYL4
chr17	47755015	47755016	SNC	5	TFBS,enhancer,motif_alter,openChrom,promoter	ATF3,CEBPB,CHD2,CTCF,E2F4,E2F6,ELK1,ETS1,FOXA1,FOXP2,GTF2F1,JUN,KDM5B,MAX,MXI1,MYC,NRF1,PHF8,PML,POLR2A,RAD21,RCOR1,SIN3AK20,SP4,TBP,TFAP2A,TFAP2C,YY1	.	MOTIFBR=ATF3,CEBPB,CTCF,DHS,E2F1,FOXA1,GTF2F1,HMGN3,JUN,JUND,MXI1,MYC,NRF1,TAF1,TBP,TFAP2A,TFAP2C#CEBPB_known6#47755015#47755027#+#2#0.162791#0.255814	.	.	Breast_variant_Human_Mammary_Epithelial_Cells_(vHMEC),Fetal_Adrenal_Gland,Fetal_Brain_Female,Fetal_Brain_Male,Fetal_Heart,Fetal_Intestine_Large,Fetal_Kidney,Fetal_Lung,Fetal_Muscle_Leg,Fetal_Muscle_Trunk,Fetal_Stomach,Fetal_Thymus,Foreskin_Fibroblast_Primary_Cells_skin01,Foreskin_Fibroblast_Primary_Cells_skin02,Foreskin_Keratinocyte_Primary_Cells_skin02,Foreskin_Melanocyte_Primary_Cells_skin01,Ga…	ADRENAL,BLOOD,BRAIN,BREAST,ESC,GI_INTESTINE,GI_STOMACH,HEART,KIDNEY,LUNG,MUSCLE,MUSCLE_LEG,Mesendoderm,OVARY,PANCREAS,PLACENTA,SKIN,STROMAL_CONNECTIVE,THYMUS	A549_EtOH_0.02pct_Lung_Carcinoma_Cell_Line,Adipose_Derived_Mesenchymal_Stem_Cell_Cultured_Cells,Adipose_Nuclei,Aorta,Bone_Marrow_Derived_Cultured_Mesenchymal_Stem_Cells,Brain_Angular_Gyrus,Brain_Anterior_Caudate,Brain_Cingulate_Gyrus,Brain_Dorsolateral_Prefrontal_Cortex,Brain_Germinal_Matrix,Brain_Hippocampus_Middle,Brain_Inferior_Temporal_Lobe,Brain_Substantia_Nigra,Breast_Myoepithelial_Primary_…	ADRENAL,BLOOD,BONE,BRAIN,BREAST,CERVIX,ENDODERM,ESC,FAT,GI_COLON,GI_DUODENUM,GI_ESOPHAGUS,GI_INTESTINE,GI_RECTUM,GI_STOMACH,HEART,KIDNEY,LIVER,LUNG,MUSCLE,MUSCLE_LEG,Mesendoderm,OVARY,PANCREAS,PLACENTA,SKIN,SPLEEN,STROMAL_CONNECTIVE,STRONAL_CONNECTIVE,THYMUS,Trophoblast,VASCULAR,iPSC	A549_EtOH_0.02pct_Lung_Carcinoma_Cell_Line,Adipose_Nuclei,Aorta,Bone_Marrow_Derived_Cultured_Mesenchymal_Stem_Cells,Brain_Angular_Gyrus,Brain_Anterior_Caudate,Brain_Cingulate_Gyrus,Brain_Dorsolateral_Prefrontal_Cortex,Brain_Hippocampus_Middle,Brain_Inferior_Temporal_Lobe,Brain_Substantia_Nigra,Colon_Smooth_Muscle,Colonic_Mucosa,Dnd41_TCell_Leukemia_Cell_Line,Duodenum_Smooth_Muscle,Esophagus,Fetal…	ADRENAL,BLOOD,BONE,BRAIN,BREAST,CERVIX,ENDODERM,ESC,FAT,GI_COLON,GI_DUODENUM,GI_ESOPHAGUS,GI_INTESTINE,GI_RECTUM,GI_STOMACH,HEART,LIVER,LUNG,MUSCLE,MUSCLE_LEG,Mesendoderm,PANCREAS,PLACENTA,SKIN,SPLEEN,STROMAL_CONNECTIVE,STRONAL_CONNECTIVE,THYMUS,VASCULAR,iPSC	.	.	.		.	G	C	C	C	C	C/C,C/C	.	0	0.912	0.678	0.559	1	0.999	0.993	2127.7	6.38858e-191	14.8	0.046548	.	SPOP
chr17	47818047	47818048	SNP	5	TFBS,enhancer,motif_alter,openChrom,promoter	CHD1,GATA2,TAL1,TEAD4	.	MOTIFBR=DHS,GATA2,TAL1#TFAP2_known10#47818047#47818062#+#2#0.189298#0.232091,DHS,GATA2,TAL1#TFAP2_known9#47818047#47818062#+#2#0.169205#0.249412	.	.	Fetal_Thymus,Primary_B_cells_from_peripheral_blood,Primary_hematopoietic_stem_cells_G-CSF-mobilized_Male	BLOOD,THYMUS	Dnd41_TCell_Leukemia_Cell_Line,Duodenum_Smooth_Muscle,GM12878_Lymphoblastoid_Cells,K562_Leukemia_Cells,Monocytes-CD14+_RO01746_Primary_Cells,Primary_B_cells_from_cord_blood,Primary_B_cells_from_peripheral_blood,Primary_Natural_Killer_cells_from_peripheral_blood,Primary_T_CD8+_memory_cells_from_peripheral_blood,Primary_T_CD8+_naive_cells_from_peripheral_blood,Primary_T_cells_effector/memory_enrich…	BLOOD,GI_COLON,GI_DUODENUM,GI_RECTUM,GI_STOMACH,THYMUS	Adipose_Nuclei,Aorta,Brain_Angular_Gyrus,Brain_Cingulate_Gyrus,Brain_Dorsolateral_Prefrontal_Cortex,Brain_Inferior_Temporal_Lobe,Colon_Smooth_Muscle,Colonic_Mucosa,Dnd41_TCell_Leukemia_Cell_Line,Duodenum_Smooth_Muscle,Esophagus,Fetal_Muscle_Leg,Fetal_Stomach,Fetal_Thymus,GM12878_Lymphoblastoid_Cells,K562_Leukemia_Cells,Left_Ventricle,Liver,Lung,Monocytes-CD14+_RO01746_Primary_Cells,Primary_B_cell…	BLOOD,BRAIN,FAT,GI_COLON,GI_DUODENUM,GI_ESOPHAGUS,GI_INTESTINE,GI_RECTUM,GI_STOMACH,HEART,LIVER,LUNG,MUSCLE,MUSCLE_LEG,SPLEEN,THYMUS,VASCULAR	.	.	.		.	A	C	C	C	C	C/C,C/C	rs73335263	AF=0.0429313	-0.517	-0.354	0.449	0	0	0.018	.	.	3.05	0.084033	3a	MYST2,SLC35B1
chr17	47842322	47842323	SNP	5	TFBS,enhancer,motif_alter,openChrom,promoter	MAX,MYC	.	MOTIFG=TFCP2_2#47842320#47842327#-#4#8.224#3.830	.	.	Primary_Natural_Killer_cells_from_peripheral_blood,Primary_T_cells_from_peripheral_blood	BLOOD	A549_EtOH_0.02pct_Lung_Carcinoma_Cell_Line,Adipose_Derived_Mesenchymal_Stem_Cell_Cultured_Cells,Brain_Angular_Gyrus,Brain_Anterior_Caudate,Brain_Cingulate_Gyrus,Brain_Dorsolateral_Prefrontal_Cortex,Brain_Germinal_Matrix,Brain_Hippocampus_Middle,Brain_Inferior_Temporal_Lobe,Brain_Substantia_Nigra,Breast_Myoepithelial_Primary_Cells,Breast_variant_Human_Mammary_Epithelial_Cells_(vHMEC),Colon_Smooth_…	BLOOD,BONE,BRAIN,BREAST,ENDODERM,ESC,FAT,GI_COLON,GI_DUODENUM,GI_INTESTINE,GI_RECTUM,GI_STOMACH,HEART,LIVER,LUNG,MUSCLE,PANCREAS,SKIN,STROMAL_CONNECTIVE,STRONAL_CONNECTIVE,THYMUS,iPSC	Adipose_Nuclei,Brain_Anterior_Caudate,Brain_Inferior_Temporal_Lobe,Duodenum_Smooth_Muscle,Gastric,K562_Leukemia_Cells,Left_Ventricle,Liver,Pancreas,Pancreatic_Islets,Primary_B_cells_from_peripheral_blood,Primary_T_cells_from_peripheral_blood,Primary_T_helper_cells_PMA-I_stimulated,Primary_T_helper_memory_cells_from_peripheral_blood_2,Primary_T_helper_naive_cells_from_peripheral_blood,Primary_T_re…	BLOOD,BRAIN,FAT,GI_COLON,GI_DUODENUM,GI_RECTUM,GI_STOMACH,HEART,LIVER,PANCREAS,SPLEEN,iPSC	.	.	.		.	A	G	G	G	G	G/G,G/G	rs530381984	AF=0.000399361	0.38	0.386	-0.146	0.998	0.997	0.654	3022.6	9.08666e-190	10.21	0.166803	.	MYST2,SLC35B1
chr17	47865384	47865385	SNC	5	TFBS,enhancer,motif_alter,openChrom,promoter	CHD1,EBF1,EZH2,FOXM1,MEF2A,MEF2C,MTA3,NFIC,POLR2A,POU2F2,RUNX3,TAF1	.	MOTIFBR=DHS,EBF1,MEF2A,TAF1#REST_known2#47865381#47865402#-#17#0.000000#0.166667	.	.	iPS_DF_6.9_Cells	iPSC	A549_EtOH_0.02pct_Lung_Carcinoma_Cell_Line,Adipose_Derived_Mesenchymal_Stem_Cell_Cultured_Cells,Adipose_Nuclei,Aorta,Bone_Marrow_Derived_Cultured_Mesenchymal_Stem_Cells,Brain_Angular_Gyrus,Brain_Anterior_Caudate,Brain_Cingulate_Gyrus,Brain_Dorsolateral_Prefrontal_Cortex,Brain_Germinal_Matrix,Brain_Hippocampus_Middle,Brain_Inferior_Temporal_Lobe,Brain_Substantia_Nigra,Breast_Myoepithelial_Primary_…	ADRENAL,BLOOD,BONE,BRAIN,BREAST,CERVIX,ENDODERM,ESC,FAT,GI_COLON,GI_DUODENUM,GI_ESOPHAGUS,GI_INTESTINE,GI_RECTUM,GI_STOMACH,HEART,KIDNEY,LIVER,LUNG,MUSCLE,MUSCLE_LEG,Mesendoderm,PANCREAS,PLACENTA,SKIN,STROMAL_CONNECTIVE,STRONAL_CONNECTIVE,THYMUS,Trophoblast,VASCULAR,iPSC	A549_EtOH_0.02pct_Lung_Carcinoma_Cell_Line,Adipose_Nuclei,Aorta,Bone_Marrow_Derived_Cultured_Mesenchymal_Stem_Cells,Brain_Angular_Gyrus,Brain_Anterior_Caudate,Brain_Cingulate_Gyrus,Brain_Dorsolateral_Prefrontal_Cortex,Brain_Hippocampus_Middle,Brain_Inferior_Temporal_Lobe,Brain_Substantia_Nigra,Colon_Smooth_Muscle,Colonic_Mucosa,Dnd41_TCell_Leukemia_Cell_Line,Duodenum_Smooth_Muscle,Esophagus,Fetal…	ADRENAL,BLOOD,BONE,BRAIN,BREAST,CERVIX,ENDODERM,ESC,FAT,GI_COLON,GI_DUODENUM,GI_ESOPHAGUS,GI_INTESTINE,GI_RECTUM,GI_STOMACH,HEART,LIVER,LUNG,MUSCLE,MUSCLE_LEG,Mesendoderm,OVARY,PANCREAS,PLACENTA,SKIN,SPLEEN,STROMAL_CONNECTIVE,STRONAL_CONNECTIVE,THYMUS,Trophoblast,VASCULAR,iPSC	.	.	.		.	A	G	G	G	G	G/G,G/G	.	0	1.324	1.334	0.651	0.012	0.011	0.94	.	.	16.64	0.071543	.	MYST2
chr17	74723217	74723218	SNP	5	TFBS,TFBS_motif,enhancer,openChrom,promoter	BHLHE40,CBX3,CCNT2,CHD1,CTCF,CTCFL,E2F6,EBF1,ELF1,ELK4,ETS1,FOXM1,FOXP2,GABPA,GATA1,GATA2,GTF2F1,HDAC1,HDAC2,HMGN3,JUND,KDM5B,MAX,MAZ,MEF2A,MXI1,MYC,NFIC,NR2F2,PAX5,PHF8,POLR2A,RAD21,RELA,RFX5,RUNX3,SIN3A,SIN3AK20,SMC3,TCF3,ZNF143	SP1	.	.	.	H1_Derived_Neuronal_Progenitor_Cultured_Cells	BRAIN	A549_EtOH_0.02pct_Lung_Carcinoma_Cell_Line,Adipose_Derived_Mesenchymal_Stem_Cell_Cultured_Cells,Adipose_Nuclei,Aorta,Bone_Marrow_Derived_Cultured_Mesenchymal_Stem_Cells,Brain_Angular_Gyrus,Brain_Anterior_Caudate,Brain_Cingulate_Gyrus,Brain_Dorsolateral_Prefrontal_Cortex,Brain_Germinal_Matrix,Brain_Hippocampus_Middle,Brain_Inferior_Temporal_Lobe,Brain_Substantia_Nigra,Breast_Myoepithelial_Primary_…	ADRENAL,BLOOD,BONE,BRAIN,BREAST,CERVIX,ENDODERM,ESC,FAT,GI_COLON,GI_DUODENUM,GI_ESOPHAGUS,GI_INTESTINE,GI_RECTUM,GI_STOMACH,HEART,KIDNEY,LIVER,LUNG,MUSCLE,MUSCLE_LEG,Mesendoderm,OVARY,PANCREAS,PLACENTA,SKIN,SPLEEN,STROMAL_CONNECTIVE,STRONAL_CONNECTIVE,THYMUS,Trophoblast,VASCULAR,iPSC	A549_EtOH_0.02pct_Lung_Carcinoma_Cell_Line,Adipose_Nuclei,Aorta,Bone_Marrow_Derived_Cultured_Mesenchymal_Stem_Cells,Brain_Angular_Gyrus,Brain_Anterior_Caudate,Brain_Cingulate_Gyrus,Brain_Dorsolateral_Prefrontal_Cortex,Brain_Hippocampus_Middle,Brain_Inferior_Temporal_Lobe,Brain_Substantia_Nigra,Colon_Smooth_Muscle,Colonic_Mucosa,Dnd41_TCell_Leukemia_Cell_Line,Duodenum_Smooth_Muscle,Esophagus,Fetal…	ADRENAL,BLOOD,BONE,BRAIN,BREAST,CERVIX,ENDODERM,ESC,FAT,GI_COLON,GI_DUODENUM,GI_ESOPHAGUS,GI_INTESTINE,GI_RECTUM,GI_STOMACH,HEART,LIVER,LUNG,MUSCLE,MUSCLE_LEG,Mesendoderm,PANCREAS,PLACENTA,SKIN,SPLEEN,STROMAL_CONNECTIVE,STRONAL_CONNECTIVE,THYMUS,Trophoblast,VASCULAR,iPSC	.	.	.		.	T	C	C	C	C	C/C,C/C	rs61097622	AF=0.0361422	0.232	0.551	0.307	0.003	0.196	0.371	210.2	1.85404e-28	10.34	0.08998	4	C17orf95,JMJD6
chr17	74748276	74748277	SNP	5	eRNA,enhancer,motif_alter,openChrom,promoter	.	.	MOTIFBR=DHS#TBX1_1#74748277#74748297#-#20#0.000917#0.003408	.	.	Fetal_Lung,Fetal_Thymus,Foreskin_Keratinocyte_Primary_Cells_skin02,Foreskin_Melanocyte_Primary_Cells_skin01,IMR90_fetal_lung_fibroblasts_Cell_Line,Primary_Natural_Killer_cells_from_peripheral_blood,Primary_T_cells_from_cord_blood,Primary_T_cells_from_peripheral_blood,Small_Intestine	BLOOD,GI_INTESTINE,LUNG,SKIN,THYMUS	Primary_T_regulatory_cells_from_peripheral_blood	BLOOD	Dnd41_TCell_Leukemia_Cell_Line,Foreskin_Melanocyte_Primary_Cells_skin03,Primary_T_CD8+_naive_cells_from_peripheral_blood,Primary_T_cells_effector/memory_enriched_from_peripheral_blood,Primary_T_cells_from_peripheral_blood,Primary_T_helper_cells_PMA-I_stimulated,Primary_T_helper_memory_cells_from_peripheral_blood_1,Primary_T_helper_memory_cells_from_peripheral_blood_2,Primary_T_helper_naive_cells_…	BLOOD,GI_RECTUM,SKIN	T_cell,natural_killer_cell	.	.		.	G	A	A	A	A	A/A,A/A	rs76789268	AF=0.00399361	0.732	0.688	0.255	0.012	0.009	0.009	.	.	3.541	0.086534	5	MFSD11,MGAT5B
chr17	76265142	76265143	SNP	5	TFBS,enhancer,motif_alter,openChrom,promoter	EZH2	.	MOTIFG=MYOG_1#76265139#76265147#+#5#8.732#4.453,TFCP2_2#76265140#76265147#-#4#8.224#3.830	.	.	H1_Derived_Mesenchymal_Stem_Cells,iPS_DF_6.9_Cells	STROMAL_CONNECTIVE,iPSC	Brain_Germinal_Matrix,Fetal_Intestine_Large,Fetal_Stomach,H1_BMP4_Derived_Mesendoderm_Cultured_Cells,H1_Cells,H9_Derived_Neuron_Cultured_Cells,H9_Derived_Neuronal_Progenitor_Cultured_Cells,HUES48_Cells,HUES64_Cells,HUES6_Cells,HeLa-S3_Cervical_Carcinoma_Cell_Line,HepG2_Hepatocellular_Carcinoma_Cell_Line,Mesenchymal_Stem_Cell_Derived_Chondrocyte_Cultured_Cells,hESC_Derived_CD56+_Ectoderm_Cultured_…	BRAIN,CERVIX,ENDODERM,ESC,GI_INTESTINE,GI_STOMACH,LIVER,Mesendoderm,STROMAL_CONNECTIVE,iPSC	Fetal_Intestine_Large,Fetal_Thymus,H1_BMP4_Derived_Mesendoderm_Cultured_Cells,HUES48_Cells,HUES6_Cells,HeLa-S3_Cervical_Carcinoma_Cell_Line,IMR90_fetal_lung_fibroblasts_Cell_Line,Liver,Lung,Ovary,Placenta,Right_Ventricle,Sigmoid_Colon,Small_Intestine,hESC_Derived_CD56+_Mesoderm_Cultured_Cells,iPS-20b_Cells,iPS_DF_19.11_Cells	CERVIX,ENDODERM,ESC,GI_COLON,GI_INTESTINE,HEART,LIVER,LUNG,Mesendoderm,OVARY,PLACENTA,THYMUS,iPSC	.	.	.		.	A	G	G	G	G	G/G,G/G	rs551668523	AF=0.000399361	0.434	0.248	0.307	0.001	0.003	0.169	.	.	6.389	0.06567	.	LOC283999,SOCS3
chr18	60951564	60951565	SNP	5	TFBS,enhancer,motif_alter,openChrom,promoter	SPI1	.	MOTIFBR=DHS,SPI1#MEF2_known8#60951554#60951570#+#12#0.090909#0.909091	.	.	Primary_B_cells_from_peripheral_blood	BLOOD	GM12878_Lymphoblastoid_Cells,Stomach_Smooth_Muscle	BLOOD,GI_STOMACH	Aorta,Brain_Anterior_Caudate,Brain_Cingulate_Gyrus,Brain_Hippocampus_Middle,Brain_Inferior_Temporal_Lobe,Colonic_Mucosa,Duodenum_Smooth_Muscle,Esophagus,Fetal_Muscle_Leg,Fetal_Stomach,GM12878_Lymphoblastoid_Cells,Ovary,Primary_B_cells_from_peripheral_blood,Primary_Natural_Killer_cells_from_peripheral_blood,Primary_T_cells_effector/memory_enriched_from_peripheral_blood,Rectal_Mucosa_Donor_29,Recta…	BLOOD,BRAIN,GI_COLON,GI_DUODENUM,GI_ESOPHAGUS,GI_RECTUM,GI_STOMACH,MUSCLE_LEG,OVARY,VASCULAR	.	.	.		.	A	C	C	C	C	C/C,C/C	rs76149772	AF=0.0163738	-0.444	-0.455	-0.363	0	0	0.002	.	.	0.388	0.108992	2b	BCL2,PHLPP1
chr18	72582317	72582318	SNC	5	CNS,TFBS,enhancer,openChrom,promoter	ATF2,BCL11A,EBF1,MEF2C,NFATC1,RUNX3	.	.	.	CNS	Fetal_Brain_Female,Fetal_Brain_Male,Foreskin_Melanocyte_Primary_Cells_skin01,H1_BMP4_Derived_Mesendoderm_Cultured_Cells,H1_BMP4_Derived_Trophoblast_Cultured_Cells,H9_Cells	BRAIN,ESC,Mesendoderm,SKIN,Trophoblast	Sigmoid_Colon	GI_COLON	Brain_Anterior_Caudate,Foreskin_Melanocyte_Primary_Cells_skin03,GM12878_Lymphoblastoid_Cells,HUES48_Cells,HUES64_Cells,Mesenchymal_Stem_Cell_Derived_Chondrocyte_Cultured_Cells,hESC_Derived_CD56+_Ectoderm_Cultured_Cells	BLOOD,BRAIN,ENDODERM,ESC,SKIN,STROMAL_CONNECTIVE	.	.	.		.	T	C	C	C	C	C/C,C/C	.	0	-0.092	0.009	0.587	0	0	0.968	518.8	3.96598e-56	12.87	0.126639	.	ZADH2,ZNF407
chr19	4375307	4375308	SNP	5	TFBS,TFBS_motif,enhancer,openChrom,promoter	CEBPB,CHD1,EP300,ESR1,GABPA,GATA1,GATA2,GATA3,HMGN3,JUND,MAX,MAZ,MXI1,MYC,NR2F2,NR3C1,PML,POLR2A,RCOR1,REST,SP1,TAL1,TBL1XR1,TEAD4,TFAP2A,TFAP2C,ZNF217	AP2,TEAD4	.	.	.	Breast_variant_Human_Mammary_Epithelial_Cells_(vHMEC),Fetal_Adrenal_Gland,Fetal_Intestine_Large,Fetal_Lung,Fetal_Muscle_Leg,Fetal_Muscle_Trunk,Gastric,H1_BMP4_Derived_Mesendoderm_Cultured_Cells,H1_BMP4_Derived_Trophoblast_Cultured_Cells,H9_Cells,Ovary,Placenta	ADRENAL,BREAST,ESC,GI_INTESTINE,GI_STOMACH,LUNG,MUSCLE,MUSCLE_LEG,Mesendoderm,OVARY,PLACENTA,Trophoblast	A549_EtOH_0.02pct_Lung_Carcinoma_Cell_Line,Adipose_Derived_Mesenchymal_Stem_Cell_Cultured_Cells,Brain_Dorsolateral_Prefrontal_Cortex,Brain_Hippocampus_Middle,Colon_Smooth_Muscle,Colonic_Mucosa,Duodenum_Mucosa,Duodenum_Smooth_Muscle,Foreskin_Fibroblast_Primary_Cells_skin01,Foreskin_Fibroblast_Primary_Cells_skin02,Foreskin_Keratinocyte_Primary_Cells_skin02,Foreskin_Keratinocyte_Primary_Cells_skin03…	BLOOD,BRAIN,CERVIX,GI_COLON,GI_DUODENUM,GI_RECTUM,LIVER,LUNG,MUSCLE,SKIN,SPLEEN,STRONAL_CONNECTIVE	A549_EtOH_0.02pct_Lung_Carcinoma_Cell_Line,Adipose_Nuclei,Aorta,Bone_Marrow_Derived_Cultured_Mesenchymal_Stem_Cells,Brain_Angular_Gyrus,Brain_Anterior_Caudate,Brain_Cingulate_Gyrus,Brain_Dorsolateral_Prefrontal_Cortex,Brain_Hippocampus_Middle,Brain_Inferior_Temporal_Lobe,Brain_Substantia_Nigra,Colon_Smooth_Muscle,Colonic_Mucosa,Duodenum_Smooth_Muscle,Esophagus,Fetal_Adrenal_Gland,Fetal_Intestine_…	ADRENAL,BLOOD,BONE,BRAIN,BREAST,CERVIX,ENDODERM,ESC,FAT,GI_COLON,GI_DUODENUM,GI_ESOPHAGUS,GI_INTESTINE,GI_RECTUM,GI_STOMACH,HEART,LIVER,LUNG,MUSCLE,MUSCLE_LEG,Mesendoderm,OVARY,PANCREAS,PLACENTA,SKIN,SPLEEN,STROMAL_CONNECTIVE,STRONAL_CONNECTIVE,THYMUS,VASCULAR,iPSC	.	.	.		.	T	C	C	C	C	C/C,C/C	rs374761028	AF=0.00219649	-2.386	-2.496	-3.005	0	0	0	.	.	0.046	0.108992	.	MPND,SH3GL1
chr19	4377413	4377414	SNP	5	DMR,TFBS,enhancer,openChrom,promoter	E2F1,JUND,MYC,POLR2A	.	.	.	.	Psoas_Muscle,Small_Intestine	GI_INTESTINE,MUSCLE	Foreskin_Fibroblast_Primary_Cells_skin01,Foreskin_Fibroblast_Primary_Cells_skin02,HeLa-S3_Cervical_Carcinoma_Cell_Line,NHEK-Epidermal_Keratinocyte_Primary_Cells,Skeletal_Muscle_Female,Skeletal_Muscle_Male	CERVIX,MUSCLE,SKIN	Adipose_Nuclei,Bone_Marrow_Derived_Cultured_Mesenchymal_Stem_Cells,Brain_Angular_Gyrus,Brain_Cingulate_Gyrus,Brain_Dorsolateral_Prefrontal_Cortex,Brain_Inferior_Temporal_Lobe,Brain_Substantia_Nigra,Colon_Smooth_Muscle,Esophagus,Fetal_Adrenal_Gland,Fetal_Intestine_Large,Fetal_Intestine_Small,Fetal_Muscle_Leg,Foreskin_Fibroblast_Primary_Cells_skin01,Foreskin_Fibroblast_Primary_Cells_skin02,GM12878_…	ADRENAL,BLOOD,BONE,BRAIN,BREAST,ESC,FAT,GI_COLON,GI_ESOPHAGUS,GI_INTESTINE,GI_RECTUM,LIVER,LUNG,MUSCLE,MUSCLE_LEG,PLACENTA,SKIN,STRONAL_CONNECTIVE	.	.	.		DMR	T	C	C	C	C	C/C,C/C	rs369229518	AF=0.00359425	0.284	0.289	0.507	0	0	0.003	.	.	1.741	0.084033	.	MPND,SH3GL1
chr19	4377492	4377493	SNP	5	DMR,TFBS,enhancer,openChrom,promoter	E2F1,JUND,MYC,POLR2A	.	.	.	.	Gastric,Pancreas,Psoas_Muscle,Small_Intestine	GI_INTESTINE,GI_STOMACH,MUSCLE,PANCREAS	Foreskin_Fibroblast_Primary_Cells_skin01,Foreskin_Fibroblast_Primary_Cells_skin02,HeLa-S3_Cervical_Carcinoma_Cell_Line,NHEK-Epidermal_Keratinocyte_Primary_Cells,Skeletal_Muscle_Female	CERVIX,MUSCLE,SKIN	Adipose_Nuclei,Bone_Marrow_Derived_Cultured_Mesenchymal_Stem_Cells,Brain_Angular_Gyrus,Brain_Cingulate_Gyrus,Brain_Dorsolateral_Prefrontal_Cortex,Brain_Inferior_Temporal_Lobe,Brain_Substantia_Nigra,Colon_Smooth_Muscle,Esophagus,Fetal_Adrenal_Gland,Fetal_Intestine_Large,Fetal_Intestine_Small,Fetal_Muscle_Leg,Fetal_Stomach,Foreskin_Fibroblast_Primary_Cells_skin01,Foreskin_Fibroblast_Primary_Cells_s…	ADRENAL,BLOOD,BONE,BRAIN,BREAST,ESC,FAT,GI_COLON,GI_ESOPHAGUS,GI_INTESTINE,GI_RECTUM,GI_STOMACH,LIVER,LUNG,MUSCLE,MUSCLE_LEG,PANCREAS,PLACENTA,SKIN,STRONAL_CONNECTIVE	.	.	.		DMR	A	T	T	T	T	T/T,T/T	rs373572327	AF=0.00219649	-0.039	-0.034	-0.373	0	0	0.001	.	.	0.306	0.084033	.	MPND,SH3GL1
chr19	5904333	5904334	SNC	5	TFBS,enhancer,motif_alter,openChrom,promoter	CHD2,EGR1,FOXA1,FOXA2,FOXP2,HDAC1,HDAC2,MAX,MXI1,MYC,NFYA,POLR2A,POU2F2,SAP30,SIN3A,SIN3AK20,SP4,SRF,TBL1XR1,TBP,TFAP2A,TFAP2C,WRNIP1	.	MOTIFBR=FOXA1,GABPA,MXI1,MYC,PAX5,POU2F2,SRF,TBP,TFAP2A,TFAP2C#RARG_6#5904320#5904337#-#3#0.010152#0.941624	.	.	Foreskin_Fibroblast_Primary_Cells_skin02,Psoas_Muscle	MUSCLE,SKIN	A549_EtOH_0.02pct_Lung_Carcinoma_Cell_Line,Adipose_Derived_Mesenchymal_Stem_Cell_Cultured_Cells,Adipose_Nuclei,Bone_Marrow_Derived_Cultured_Mesenchymal_Stem_Cells,Brain_Angular_Gyrus,Brain_Anterior_Caudate,Brain_Cingulate_Gyrus,Brain_Dorsolateral_Prefrontal_Cortex,Brain_Germinal_Matrix,Brain_Hippocampus_Middle,Brain_Inferior_Temporal_Lobe,Brain_Substantia_Nigra,Breast_Myoepithelial_Primary_Cells,…	ADRENAL,BLOOD,BONE,BRAIN,BREAST,CERVIX,ENDODERM,ESC,FAT,GI_COLON,GI_DUODENUM,GI_ESOPHAGUS,GI_INTESTINE,GI_RECTUM,GI_STOMACH,HEART,KIDNEY,LIVER,LUNG,MUSCLE,MUSCLE_LEG,Mesendoderm,OVARY,PANCREAS,PLACENTA,SKIN,STROMAL_CONNECTIVE,STRONAL_CONNECTIVE,THYMUS,Trophoblast,VASCULAR,iPSC	A549_EtOH_0.02pct_Lung_Carcinoma_Cell_Line,Adipose_Nuclei,Aorta,Bone_Marrow_Derived_Cultured_Mesenchymal_Stem_Cells,Brain_Angular_Gyrus,Brain_Anterior_Caudate,Brain_Cingulate_Gyrus,Brain_Dorsolateral_Prefrontal_Cortex,Brain_Hippocampus_Middle,Brain_Inferior_Temporal_Lobe,Brain_Substantia_Nigra,Colon_Smooth_Muscle,Colonic_Mucosa,Dnd41_TCell_Leukemia_Cell_Line,Duodenum_Smooth_Muscle,Esophagus,Fetal…	ADRENAL,BLOOD,BONE,BRAIN,BREAST,CERVIX,ENDODERM,ESC,FAT,GI_COLON,GI_DUODENUM,GI_ESOPHAGUS,GI_INTESTINE,GI_RECTUM,GI_STOMACH,HEART,LIVER,LUNG,MUSCLE,MUSCLE_LEG,PANCREAS,PLACENTA,SKIN,SPLEEN,STROMAL_CONNECTIVE,STRONAL_CONNECTIVE,THYMUS,Trophoblast,VASCULAR,iPSC	.	.	.		.	C	A	A	A	A	A/A,A/A	.	0	-1.672	-1.786	0.478	0	0	0.002	.	.	9.013	0	.	NDUFA11,VMAC
chr19	46580447	46580448	SNP	5	TFBS,enhancer,motif_alter,openChrom,promoter	EZH2,PAX5	.	MOTIFBR=DHS#HIC1_1#46580438#46580453#+#11#0.080808#0.666667	.	.	Breast_variant_Human_Mammary_Epithelial_Cells_(vHMEC),H1_Cells,H1_Derived_Neuronal_Progenitor_Cultured_Cells,Placenta	BRAIN,BREAST,ESC,PLACENTA	A549_EtOH_0.02pct_Lung_Carcinoma_Cell_Line,Adipose_Derived_Mesenchymal_Stem_Cell_Cultured_Cells,Brain_Angular_Gyrus,Brain_Anterior_Caudate,Brain_Cingulate_Gyrus,Brain_Dorsolateral_Prefrontal_Cortex,Brain_Germinal_Matrix,Brain_Hippocampus_Middle,Brain_Inferior_Temporal_Lobe,Brain_Substantia_Nigra,Breast_Myoepithelial_Primary_Cells,Breast_variant_Human_Mammary_Epithelial_Cells_(vHMEC),Colon_Smooth_…	BLOOD,BRAIN,BREAST,ENDODERM,ESC,GI_COLON,GI_DUODENUM,GI_INTESTINE,GI_RECTUM,GI_STOMACH,LIVER,LUNG,MUSCLE,MUSCLE_LEG,PANCREAS,SKIN,STROMAL_CONNECTIVE,STRONAL_CONNECTIVE,Trophoblast,iPSC	A549_EtOH_0.02pct_Lung_Carcinoma_Cell_Line,Brain_Angular_Gyrus,Brain_Anterior_Caudate,Brain_Cingulate_Gyrus,Brain_Hippocampus_Middle,Brain_Inferior_Temporal_Lobe,Brain_Substantia_Nigra,Fetal_Muscle_Leg,HepG2_Hepatocellular_Carcinoma_Cell_Line	BRAIN,LIVER,LUNG,MUSCLE_LEG	.	.	.		.	C	T	T	T	T	T/T,T/T	rs139982971	AF=0.0091853	-0.962	-1.134	0.329	0	0	0.008	.	.	9.402	0.11394	.	IGFL3,IGFL4
chr19	46624881	46624882	SNP	5	TFBS,TFBS_motif,enhancer,openChrom,promoter	BHLHE40,USF1	BHLHE40,USF	.	.	.	Ovary	OVARY	NH-A_Astrocytes_Primary_Cells	BRAIN	Foreskin_Keratinocyte_Primary_Cells_skin03,hESC_Derived_CD56+_Mesoderm_Cultured_Cells	ENDODERM,SKIN	.	.	.		.	C	G	G	G	G	G/G,G/G	rs117202969	AF=0.00938498	0.202	0.195	0.198	0.003	0.003	0.004	.	.	0.534	0.06567	3a	IGFL3,IGFL4
chr2	95692502	95692503	SNP	5	DE_gene,TFBS,enhancer,openChrom,promoter	E2F6,EBF1	.	.	.	.	Fetal_Heart,Gastric,Primary_T_cells_from_cord_blood	BLOOD,GI_STOMACH,HEART	Brain_Angular_Gyrus,Brain_Anterior_Caudate,Brain_Cingulate_Gyrus,Brain_Dorsolateral_Prefrontal_Cortex,Brain_Germinal_Matrix,Brain_Hippocampus_Middle,Brain_Inferior_Temporal_Lobe,Brain_Substantia_Nigra,Breast_Myoepithelial_Primary_Cells,Colon_Smooth_Muscle,Colonic_Mucosa,Dnd41_TCell_Leukemia_Cell_Line,Duodenum_Mucosa,Duodenum_Smooth_Muscle,ES-UCSF4_Cells,Esophagus,Fetal_Brain_Female,Fetal_Kidney,F…	BLOOD,BRAIN,BREAST,ENDODERM,ESC,GI_COLON,GI_DUODENUM,GI_ESOPHAGUS,GI_INTESTINE,GI_RECTUM,GI_STOMACH,HEART,KIDNEY,LUNG,MUSCLE,SKIN,SPLEEN,STROMAL_CONNECTIVE,THYMUS,iPSC	Brain_Angular_Gyrus,Brain_Anterior_Caudate,Brain_Cingulate_Gyrus,Brain_Dorsolateral_Prefrontal_Cortex,Brain_Hippocampus_Middle,Brain_Inferior_Temporal_Lobe,Brain_Substantia_Nigra,Colonic_Mucosa,Dnd41_TCell_Leukemia_Cell_Line,Esophagus,Fetal_Stomach,Fetal_Thymus,Gastric,Placenta,Primary_T_CD8+_naive_cells_from_peripheral_blood,Primary_T_cells_effector/memory_enriched_from_peripheral_blood,Primary_…	BLOOD,BRAIN,GI_COLON,GI_ESOPHAGUS,GI_RECTUM,GI_STOMACH,HEART,PLACENTA,THYMUS	.	.	MAL	kidney	.	C	T	T	T	T	T/T,T/T	rs112982413	AF=0.000599042	0.223	0.187	0.375	0	0	0.002	.	.	8.876	0.166803	4	MAL,MRPS5
chr2	95706488	95706489	SNC	5	DE_gene,TFBS,TFBS_motif,enhancer,openChrom	CTCF,ZNF263	CTCF	.	.	.	H1_BMP4_Derived_Mesendoderm_Cultured_Cells,H9_Cells	ESC,Mesendoderm	.	.	Brain_Angular_Gyrus,Brain_Anterior_Caudate,Brain_Cingulate_Gyrus,Brain_Dorsolateral_Prefrontal_Cortex,Brain_Hippocampus_Middle,Brain_Inferior_Temporal_Lobe,Brain_Substantia_Nigra,Colon_Smooth_Muscle,Esophagus,Fetal_Muscle_Leg,Fetal_Stomach,Fetal_Thymus,Foreskin_Melanocyte_Primary_Cells_skin01,Foreskin_Melanocyte_Primary_Cells_skin03,HSMM_cell_derived_Skeletal_Muscle_Myotubes_Cells,Lung,Primary_T_…	BLOOD,BRAIN,GI_COLON,GI_ESOPHAGUS,GI_RECTUM,GI_STOMACH,LUNG,MUSCLE,MUSCLE_LEG,SKIN,THYMUS	.	.	MAL	kidney	.	T	C	C	C	C	C/C,C/C	.	0	-0.452	-0.503	-1.071	0	0	0	.	.	1.053	0.074388	.	MAL,MRPS5
chr2	95825127	95825128	SNC	5	TFBS,TFBS_motif,enhancer,openChrom,promoter	CHD1,E2F6,ELF1,HDAC1,MAX,MYC,PHF8,POLR2A,TAF1,UBTF,ZNF263	ELF1,GABP	.	.	.	Fetal_Heart,Fetal_Intestine_Small,Fetal_Kidney,Fetal_Muscle_Trunk,Fetal_Stomach,Fetal_Thymus,Foreskin_Fibroblast_Primary_Cells_skin01,Foreskin_Fibroblast_Primary_Cells_skin02,Foreskin_Melanocyte_Primary_Cells_skin01,H1_BMP4_Derived_Mesendoderm_Cultured_Cells,H1_Derived_Mesenchymal_Stem_Cells,H1_Derived_Neuronal_Progenitor_Cultured_Cells,Placenta,Primary_B_cells_from_peripheral_blood,Primary_T_cel…	BLOOD,BRAIN,GI_INTESTINE,GI_STOMACH,HEART,KIDNEY,MUSCLE,Mesendoderm,PLACENTA,SKIN,STROMAL_CONNECTIVE,THYMUS,iPSC	A549_EtOH_0.02pct_Lung_Carcinoma_Cell_Line,Adipose_Derived_Mesenchymal_Stem_Cell_Cultured_Cells,Adipose_Nuclei,Aorta,Bone_Marrow_Derived_Cultured_Mesenchymal_Stem_Cells,Brain_Angular_Gyrus,Brain_Anterior_Caudate,Brain_Cingulate_Gyrus,Brain_Dorsolateral_Prefrontal_Cortex,Brain_Germinal_Matrix,Brain_Hippocampus_Middle,Brain_Inferior_Temporal_Lobe,Brain_Substantia_Nigra,Breast_Myoepithelial_Primary_…	ADRENAL,BLOOD,BONE,BRAIN,BREAST,CERVIX,ENDODERM,ESC,FAT,GI_COLON,GI_DUODENUM,GI_ESOPHAGUS,GI_INTESTINE,GI_RECTUM,GI_STOMACH,HEART,KIDNEY,LIVER,LUNG,MUSCLE,MUSCLE_LEG,Mesendoderm,OVARY,PANCREAS,PLACENTA,SKIN,SPLEEN,STROMAL_CONNECTIVE,STRONAL_CONNECTIVE,THYMUS,Trophoblast,VASCULAR,iPSC	A549_EtOH_0.02pct_Lung_Carcinoma_Cell_Line,Adipose_Nuclei,Aorta,Brain_Angular_Gyrus,Brain_Anterior_Caudate,Brain_Cingulate_Gyrus,Brain_Dorsolateral_Prefrontal_Cortex,Brain_Hippocampus_Middle,Brain_Inferior_Temporal_Lobe,Brain_Substantia_Nigra,Colon_Smooth_Muscle,Colonic_Mucosa,Dnd41_TCell_Leukemia_Cell_Line,Esophagus,Fetal_Adrenal_Gland,Fetal_Intestine_Large,Fetal_Intestine_Small,Fetal_Muscle_Leg…	ADRENAL,BLOOD,BONE,BRAIN,CERVIX,FAT,GI_COLON,GI_ESOPHAGUS,GI_INTESTINE,GI_RECTUM,GI_STOMACH,HEART,LIVER,LUNG,MUSCLE,MUSCLE_LEG,OVARY,PANCREAS,PLACENTA,SKIN,SPLEEN,STROMAL_CONNECTIVE,THYMUS,VASCULAR	.	.	.		.	A	G	G	G	G	G/G,G/G	.	0	0.724	1.221	0.5	0.002	0.001	0.09	.	.	8.236	0.075627	.	ZNF514
chr2	227476886	227476887	SNP	5	TFBS,TFBS_motif,enhancer,motif_alter,openChrom	CEBPB,EP300,FOS,FOSL2,POLR2A,STAT3,TCF7L2,ZBTB33	AP1	MOTIFBR=DHS,EP300,STAT3,TCF7L2#BACH2_1#227476885#227476896#+#3#0.000000#0.076923,DHS,EP300,STAT3,TCF7L2#JDP2_2#227476886#227476895#-#8#0.002129#0.002555,DHS,EP300,STAT3,TCF7L2#AP1_known9#227476887#227476895#+#1#0.067227#0.159664	.	.	Breast_variant_Human_Mammary_Epithelial_Cells_(vHMEC),Foreskin_Fibroblast_Primary_Cells_skin01,Foreskin_Fibroblast_Primary_Cells_skin02,Foreskin_Keratinocyte_Primary_Cells_skin02,IMR90_fetal_lung_fibroblasts_Cell_Line	BREAST,LUNG,SKIN	.	.	A549_EtOH_0.02pct_Lung_Carcinoma_Cell_Line,Bone_Marrow_Derived_Cultured_Mesenchymal_Stem_Cells,IMR90_fetal_lung_fibroblasts_Cell_Line,Liver,Mesenchymal_Stem_Cell_Derived_Chondrocyte_Cultured_Cells,NH-A_Astrocytes_Primary_Cells,Osteoblast_Primary_Cells	BONE,BRAIN,LIVER,LUNG,STROMAL_CONNECTIVE,STRONAL_CONNECTIVE	.	.	.		.	G	A	A	A	A	A/A,A/A	rs147807628	AF=0.00219649	-1.317	-1.507	-0.345	0	0	0	.	.	2.992	0.080754	.	IRS1
chr20	36330978	36330979	SNP	5	DE_gene,TFBS,TFBS_motif,enhancer,motif_alter	TAL1	GATA1-ext	MOTIFBR=DHS,TAL1#TBX15_1#36330968#36330987#-#8#0.000000#0.001974,DHS,TAL1#TBX20_2#36330968#36330987#-#8#0.000508#0.005079,DHS,TAL1#TBX20_2#36330968#36330987#+#12#0.001470#0.002205	.	.	.	.	.	.	Monocytes-CD14+_RO01746_Primary_Cells,Primary_hematopoietic_stem_cells_G-CSF-mobilized_Female	BLOOD	.	.	CTNNBL1	liver	.	C	A	A	A	A	A/A,A/A	rs6012863	AF=0.00758786	-0.881	-0.942	-0.422	0	0	0.006	.	.	3.954	0.053691	2c	CTNNBL1,KIAA0406
chr20	36340457	36340458	SNP	5	DE_gene,TFBS,enhancer,openChrom,promoter	E2F6,GATA2	.	.	.	.	Fetal_Intestine_Large,Fetal_Intestine_Small,Small_Intestine	GI_INTESTINE	Ganglion_Eminence_derived_primary_cultured_neurospheres,Skeletal_Muscle_Female	BRAIN,MUSCLE	Brain_Angular_Gyrus,Brain_Anterior_Caudate,Brain_Cingulate_Gyrus,Brain_Hippocampus_Middle,Brain_Inferior_Temporal_Lobe,Brain_Substantia_Nigra,Fetal_Intestine_Large,Fetal_Intestine_Small,H1_BMP4_Derived_Mesendoderm_Cultured_Cells,H1_BMP4_Derived_Trophoblast_Cultured_Cells,Left_Ventricle,Liver,Lung,Placenta,Primary_hematopoietic_stem_cells_G-CSF-mobilized_Female,Rectal_Mucosa_Donor_29,Rectal_Mucosa…	BLOOD,BRAIN,ENDODERM,GI_COLON,GI_INTESTINE,GI_RECTUM,GI_STOMACH,HEART,LIVER,LUNG,MUSCLE,Mesendoderm,PLACENTA,SPLEEN,Trophoblast	.	.	CTNNBL1	liver	.	G	A	A	A	A	A/A,A/A	rs6125958	AF=0.0061901	-0.445	-0.683	-1.154	0	0	0.007	.	.	1.464	0.088506	2b	CTNNBL1,KIAA0406
chr20	36343639	36343640	SNP	5	DE_gene,TFBS,eRNA,enhancer,promoter	CEBPB,FOS,JUN,JUND,STAT3	.	.	.	.	.	.	Bone_Marrow_Derived_Cultured_Mesenchymal_Stem_Cells,Mesenchymal_Stem_Cell_Derived_Chondrocyte_Cultured_Cells,Monocytes-CD14+_RO01746_Primary_Cells,Osteoblast_Primary_Cells,Primary_hematopoietic_stem_cells_G-CSF-mobilized_Female,Primary_hematopoietic_stem_cells_G-CSF-mobilized_Male,Primary_neutrophils_from_peripheral_blood	BLOOD,BONE,STROMAL_CONNECTIVE,STRONAL_CONNECTIVE	Bone_Marrow_Derived_Cultured_Mesenchymal_Stem_Cells,Liver,Mesenchymal_Stem_Cell_Derived_Chondrocyte_Cultured_Cells,Monocytes-CD14+_RO01746_Primary_Cells,Osteoblast_Primary_Cells,Placenta,Primary_hematopoietic_stem_cells_G-CSF-mobilized_Female	BLOOD,BONE,LIVER,PLACENTA,STROMAL_CONNECTIVE,STRONAL_CONNECTIVE	basophil,mast_cell,monocyte	.	CTNNBL1	liver	.	G	A	A	A	A	A/A,A/A	rs6122898	AF=0.0061901	-1.173	-1.193	-1.846	0	0	0.001	.	.	1.988	0.053691	4	CTNNBL1,KIAA0406
chr20	36343704	36343705	SNP	5	DE_gene,TFBS,enhancer,openChrom,promoter	CEBPB,FOS,JUN,JUND,STAT3	.	.	.	.	Gastric	GI_STOMACH	Bone_Marrow_Derived_Cultured_Mesenchymal_Stem_Cells,Mesenchymal_Stem_Cell_Derived_Chondrocyte_Cultured_Cells,Monocytes-CD14+_RO01746_Primary_Cells,Osteoblast_Primary_Cells,Primary_hematopoietic_stem_cells_G-CSF-mobilized_Female,Primary_hematopoietic_stem_cells_G-CSF-mobilized_Male,Primary_neutrophils_from_peripheral_blood	BLOOD,BONE,STROMAL_CONNECTIVE,STRONAL_CONNECTIVE	Bone_Marrow_Derived_Cultured_Mesenchymal_Stem_Cells,Liver,Mesenchymal_Stem_Cell_Derived_Chondrocyte_Cultured_Cells,Monocytes-CD14+_RO01746_Primary_Cells,Osteoblast_Primary_Cells,Placenta,Placenta_Amnion,Primary_hematopoietic_stem_cells_G-CSF-mobilized_Female	BLOOD,BONE,LIVER,PLACENTA,STROMAL_CONNECTIVE,STRONAL_CONNECTIVE	.	.	CTNNBL1	liver	.	A	G	G	G	G	G/G,G/G	rs6122899	AF=0.0061901	-0.011	-0.01	0.651	0	0	0.01	.	.	3.976	0.053691	4	CTNNBL1,KIAA0406
chr20	36386781	36386782	SNC	5	DE_gene,TFBS,enhancer,motif_alter,openChrom	CTCF	.	MOTIFBR=CTCF#NHLH1_5#36386781#36386791#+#2#0.048168#0.060719	.	.	Fetal_Lung,Fetal_Thymus	LUNG,THYMUS	.	.	Foreskin_Melanocyte_Primary_Cells_skin03,Right_Atrium,Skeletal_Muscle_Female	HEART,MUSCLE,SKIN	.	.	CTNNBL1	liver	.	C	T	T	T	T	T/T,T/T	.	0	-1.01	-1.127	-1.277	0	0	0.001	.	.	4.042	0.062308	.	CTNNBL1,KIAA0406
chr3	32910459	32910460	SNP	5	DE_gene,TFBS,enhancer,openChrom,promoter	CHD1,MAX,USF1	.	.	.	.	H1_Cells,H9_Cells,iPS_DF_6.9_Cells	ESC,iPSC	H1_Cells,HUES48_Cells,HUES64_Cells,HUES6_Cells,hESC_Derived_CD56+_Ectoderm_Cultured_Cells,iPS-15b_Cells,iPS-18_Cells,iPS-20b_Cells	ENDODERM,ESC,iPSC	H1_BMP4_Derived_Mesendoderm_Cultured_Cells,H1_BMP4_Derived_Trophoblast_Cultured_Cells,H1_Cells,H1_Derived_Neuronal_Progenitor_Cultured_Cells,H9_Cells,HUES48_Cells,HUES64_Cells,HUES6_Cells,hESC_Derived_CD184+_Endoderm_Cultured_Cells,hESC_Derived_CD56+_Ectoderm_Cultured_Cells,hESC_Derived_CD56+_Mesoderm_Cultured_Cells,iPS-18_Cells,iPS-20b_Cells,iPS_DF_19.11_Cells,iPS_DF_6.9_Cells	BRAIN,ENDODERM,ESC,Mesendoderm,Trophoblast,iPSC	.	.	TRIM71	testis	.	A	G	G	G	G	G/G,G/G	rs79549068	AF=0.0611022	-0.503	-0.494	-0.23	0	0	0.004	.	.	0.754	0.078958	4	CCR4,TRIM71
chr3	32910888	32910889	SNP	5	DE_gene,TFBS,enhancer,openChrom,promoter	RBBP5	.	.	.	.	H1_BMP4_Derived_Mesendoderm_Cultured_Cells,H9_Cells,iPS_DF_6.9_Cells	ESC,Mesendoderm,iPSC	ES-UCSF4_Cells,H1_Cells,H9_Cells,HUES48_Cells,HUES64_Cells,HUES6_Cells,hESC_Derived_CD184+_Endoderm_Cultured_Cells,iPS-15b_Cells,iPS-18_Cells,iPS-20b_Cells	ENDODERM,ESC,iPSC	H1_BMP4_Derived_Mesendoderm_Cultured_Cells,H1_BMP4_Derived_Trophoblast_Cultured_Cells,H1_Cells,H1_Derived_Neuronal_Progenitor_Cultured_Cells,H9_Cells,HUES48_Cells,HUES64_Cells,HUES6_Cells,HepG2_Hepatocellular_Carcinoma_Cell_Line,hESC_Derived_CD184+_Endoderm_Cultured_Cells,hESC_Derived_CD56+_Ectoderm_Cultured_Cells,hESC_Derived_CD56+_Mesoderm_Cultured_Cells,iPS-18_Cells,iPS-20b_Cells,iPS_DF_19.11_…	BRAIN,ENDODERM,ESC,LIVER,Mesendoderm,Trophoblast,iPSC	.	.	TRIM71	testis	.	G	A	A	A	A	A/A,A/A	rs74483552	AF=0.0517173	-0.09	-0.111	-0.6	0	0	0.001	.	.	1.124	0.078958	5	CCR4,TRIM71
chr3	62859500	62859501	SNP	5	TFBS,eQTL,enhancer,openChrom,promoter	CTBP2,CTCF,EP300,EZH2,GATA2,RAD21,RXRA,YY1	.	.	Nerve_Tibial,Thyroid,fibroblasts	.	Fetal_Adrenal_Gland,Fetal_Intestine_Large,Fetal_Kidney,Fetal_Muscle_Trunk,Fetal_Stomach,Foreskin_Melanocyte_Primary_Cells_skin01,H1_BMP4_Derived_Mesendoderm_Cultured_Cells,H1_Cells,H1_Derived_Neuronal_Progenitor_Cultured_Cells,H9_Cells,Small_Intestine,iPS_DF_19.11_Cells,iPS_DF_6.9_Cells	ADRENAL,BRAIN,ESC,GI_INTESTINE,GI_STOMACH,KIDNEY,MUSCLE,Mesendoderm,SKIN,iPSC	A549_EtOH_0.02pct_Lung_Carcinoma_Cell_Line,Adipose_Derived_Mesenchymal_Stem_Cell_Cultured_Cells,Adipose_Nuclei,Bone_Marrow_Derived_Cultured_Mesenchymal_Stem_Cells,Brain_Angular_Gyrus,Brain_Anterior_Caudate,Brain_Cingulate_Gyrus,Brain_Dorsolateral_Prefrontal_Cortex,Brain_Germinal_Matrix,Brain_Hippocampus_Middle,Brain_Inferior_Temporal_Lobe,Brain_Substantia_Nigra,Breast_Myoepithelial_Primary_Cells,…	ADRENAL,BLOOD,BRAIN,BREAST,ENDODERM,ESC,FAT,GI_COLON,GI_DUODENUM,GI_ESOPHAGUS,GI_INTESTINE,GI_RECTUM,GI_STOMACH,HEART,KIDNEY,LUNG,MUSCLE,MUSCLE_LEG,OVARY,PANCREAS,PLACENTA,SKIN,STROMAL_CONNECTIVE,STRONAL_CONNECTIVE,THYMUS,Trophoblast,iPSC	Brain_Angular_Gyrus,Brain_Anterior_Caudate,Brain_Cingulate_Gyrus,Brain_Dorsolateral_Prefrontal_Cortex,Brain_Hippocampus_Middle,Brain_Inferior_Temporal_Lobe,Brain_Substantia_Nigra,Fetal_Intestine_Small,Fetal_Stomach,H1_BMP4_Derived_Mesendoderm_Cultured_Cells,H1_Cells,HUES48_Cells,Left_Ventricle,Pancreatic_Islets,Rectal_Mucosa_Donor_29,Rectal_Mucosa_Donor_31,Right_Atrium,Right_Ventricle,Small_Intes…	BRAIN,ENDODERM,ESC,GI_INTESTINE,GI_RECTUM,GI_STOMACH,HEART,Mesendoderm,PANCREAS,iPSC	.	.	.		.	C	G	G	G	G	G/G,G/G	rs149905703	AF=0.0307508	0.333	0.367	-0.393	0	0.004	0.16	.	.	9.814	0.095506	.	CADPS,FEZF2
chr3	99980382	99980383	SNP	5	TFBS,enhancer,motif_alter,openChrom,promoter	CEBPB,CHD1,EP300,HNF4A,HNF4G,JUN,JUND,POLR2A,SMARCA4,SMARCB1,SMARCC2,TEAD4,WRNIP1	.	MOTIFG=KLF12_1#99980377#99980384#-#1#6.809#5.472	.	.	Fetal_Intestine_Large,Fetal_Intestine_Small,Fetal_Muscle_Leg,Foreskin_Fibroblast_Primary_Cells_skin01,Ovary,Pancreas,Small_Intestine	GI_INTESTINE,MUSCLE_LEG,OVARY,PANCREAS,SKIN	A549_EtOH_0.02pct_Lung_Carcinoma_Cell_Line,Adipose_Derived_Mesenchymal_Stem_Cell_Cultured_Cells,Adipose_Nuclei,Aorta,Bone_Marrow_Derived_Cultured_Mesenchymal_Stem_Cells,Brain_Angular_Gyrus,Brain_Anterior_Caudate,Brain_Cingulate_Gyrus,Brain_Dorsolateral_Prefrontal_Cortex,Brain_Germinal_Matrix,Brain_Hippocampus_Middle,Brain_Inferior_Temporal_Lobe,Brain_Substantia_Nigra,Breast_Myoepithelial_Primary_…	ADRENAL,BLOOD,BONE,BRAIN,BREAST,CERVIX,ENDODERM,ESC,FAT,GI_COLON,GI_DUODENUM,GI_ESOPHAGUS,GI_INTESTINE,GI_RECTUM,GI_STOMACH,HEART,KIDNEY,LIVER,LUNG,MUSCLE,MUSCLE_LEG,Mesendoderm,OVARY,PANCREAS,PLACENTA,SKIN,SPLEEN,STROMAL_CONNECTIVE,STRONAL_CONNECTIVE,THYMUS,Trophoblast,VASCULAR,iPSC	A549_EtOH_0.02pct_Lung_Carcinoma_Cell_Line,Adipose_Nuclei,Aorta,Bone_Marrow_Derived_Cultured_Mesenchymal_Stem_Cells,Brain_Angular_Gyrus,Brain_Anterior_Caudate,Brain_Cingulate_Gyrus,Brain_Dorsolateral_Prefrontal_Cortex,Brain_Hippocampus_Middle,Brain_Inferior_Temporal_Lobe,Brain_Substantia_Nigra,Colon_Smooth_Muscle,Dnd41_TCell_Leukemia_Cell_Line,Duodenum_Smooth_Muscle,Esophagus,Fetal_Adrenal_Gland,…	ADRENAL,BLOOD,BONE,BRAIN,BREAST,CERVIX,ENDODERM,ESC,FAT,GI_COLON,GI_DUODENUM,GI_ESOPHAGUS,GI_INTESTINE,GI_RECTUM,GI_STOMACH,HEART,LIVER,LUNG,MUSCLE,MUSCLE_LEG,PANCREAS,PLACENTA,SKIN,SPLEEN,STROMAL_CONNECTIVE,STRONAL_CONNECTIVE,THYMUS,VASCULAR	.	.	.		.	T	G	G	G	G	G/G,G/G	rs138049694	AF=0.00299521	-0.673	-0.757	-0.353	0	0	0.001	.	.	6.156	0	.	TBC1D23
chr3	136432981	136432982	SNP	5	TFBS,TFBS_motif,enhancer,openChrom,promoter	CEBPB	CEBPB	.	.	.	Primary_Natural_Killer_cells_from_peripheral_blood,Primary_hematopoietic_stem_cells_G-CSF-mobilized_Female,Primary_monocytes_from_peripheral_blood	BLOOD	Monocytes-CD14+_RO01746_Primary_Cells,Primary_neutrophils_from_peripheral_blood	BLOOD	HepG2_Hepatocellular_Carcinoma_Cell_Line,Monocytes-CD14+_RO01746_Primary_Cells,Primary_Natural_Killer_cells_from_peripheral_blood,Primary_monocytes_from_peripheral_blood,Spleen	BLOOD,LIVER,SPLEEN	.	.	.		.	C	T	T	T	T	T/T,T/T	rs113029737	AF=0.000798722	0.836	0.107	0.105	0.998	0.091	0.093	.	.	6.005	0.069865	3a	PCCB,STAG1
chr3	191888569	191888570	SNP	5	TFBS,enhancer,motif_alter,openChrom,promoter	EP300	.	MOTIFBR=DHS,EP300#HOXB6_1#191888556#191888572#-#2#0.096589#0.279324,DHS,EP300#DMRT1_1#191888564#191888579#-#9#0.000000#0.590909	.	.	Breast_variant_Human_Mammary_Epithelial_Cells_(vHMEC),H1_BMP4_Derived_Mesendoderm_Cultured_Cells	BREAST,Mesendoderm	NHEK-Epidermal_Keratinocyte_Primary_Cells,Ovary	OVARY,SKIN	Brain_Dorsolateral_Prefrontal_Cortex,Fetal_Adrenal_Gland,Foreskin_Keratinocyte_Primary_Cells_skin03,HUES48_Cells,NHEK-Epidermal_Keratinocyte_Primary_Cells,iPS-18_Cells	ADRENAL,BRAIN,ESC,SKIN,iPSC	.	.	.		.	A	G	G	G	G	G/G,G/G	rs75996617	AF=0.0730831	-0.986	-1.298	-1.136	0	0	0	.	.	0.933	0.087844	3a	FGF12,PYDC2
chr4	74889630	74889631	SNC	5	TFBS,enhancer,motif_alter,openChrom,promoter	BCL3,EP300,REST,TCF12,ZBTB33	.	MOTIFBR=DHS#POU2F2_known5#74889625#74889639#+#7#0.000000#0.714286	.	.	Fetal_Intestine_Large,Fetal_Stomach,Gastric,Small_Intestine	GI_INTESTINE,GI_STOMACH	A549_EtOH_0.02pct_Lung_Carcinoma_Cell_Line,Colonic_Mucosa,Rectal_Mucosa_Donor_29,Rectal_Mucosa_Donor_31	GI_COLON,GI_RECTUM,LUNG	A549_EtOH_0.02pct_Lung_Carcinoma_Cell_Line,Fetal_Intestine_Large,Fetal_Stomach,Rectal_Mucosa_Donor_29,Rectal_Mucosa_Donor_31,Small_Intestine	GI_INTESTINE,GI_RECTUM,GI_STOMACH,LUNG	.	.	.	.	.	T	G	G	G	G	G/G,G/G	.	0	-0.522	-0.554	-0.138	0	0	0.001	.	.	2.916	0.053691	.	CXCL3,CXCL5
chr4	74904603	74904604	SNP	5	TFBS,enhancer,motif_alter,openChrom,promoter	EGR1,GTF2F1,HMGN3,JUND,KDM5B,MAZ,PHF8,POLR2A,RBBP5,TAF1,TBP,TEAD4,ZBTB7A,ZNF143	.	MOTIFBR=DHS,EGR1,GTF2F1,TAF1,TBP#VDR_6#74904599#74904615#-#11#0.325112#0.674888	.	.	Fetal_Adrenal_Gland,Fetal_Brain_Male,Fetal_Intestine_Large,Fetal_Intestine_Small,Fetal_Muscle_Trunk,Fetal_Thymus,Foreskin_Fibroblast_Primary_Cells_skin01,Foreskin_Fibroblast_Primary_Cells_skin02,Foreskin_Melanocyte_Primary_Cells_skin01,H1_BMP4_Derived_Mesendoderm_Cultured_Cells,H1_BMP4_Derived_Trophoblast_Cultured_Cells,H1_Derived_Neuronal_Progenitor_Cultured_Cells,H9_Cells,Ovary,Primary_hematopo…	ADRENAL,BLOOD,BRAIN,ESC,GI_INTESTINE,MUSCLE,Mesendoderm,OVARY,SKIN,THYMUS,Trophoblast	A549_EtOH_0.02pct_Lung_Carcinoma_Cell_Line,Adipose_Derived_Mesenchymal_Stem_Cell_Cultured_Cells,Adipose_Nuclei,Aorta,Bone_Marrow_Derived_Cultured_Mesenchymal_Stem_Cells,Brain_Angular_Gyrus,Brain_Anterior_Caudate,Brain_Cingulate_Gyrus,Brain_Dorsolateral_Prefrontal_Cortex,Brain_Germinal_Matrix,Brain_Hippocampus_Middle,Brain_Inferior_Temporal_Lobe,Brain_Substantia_Nigra,Breast_Myoepithelial_Primary_…	ADRENAL,BLOOD,BONE,BRAIN,BREAST,CERVIX,ENDODERM,ESC,FAT,GI_COLON,GI_DUODENUM,GI_ESOPHAGUS,GI_INTESTINE,GI_RECTUM,GI_STOMACH,HEART,KIDNEY,LIVER,LUNG,MUSCLE,MUSCLE_LEG,Mesendoderm,OVARY,PANCREAS,PLACENTA,SKIN,SPLEEN,STROMAL_CONNECTIVE,STRONAL_CONNECTIVE,THYMUS,Trophoblast,VASCULAR,iPSC	A549_EtOH_0.02pct_Lung_Carcinoma_Cell_Line,Adipose_Nuclei,Bone_Marrow_Derived_Cultured_Mesenchymal_Stem_Cells,Brain_Angular_Gyrus,Brain_Anterior_Caudate,Brain_Cingulate_Gyrus,Brain_Hippocampus_Middle,Brain_Substantia_Nigra,Colonic_Mucosa,Dnd41_TCell_Leukemia_Cell_Line,Duodenum_Smooth_Muscle,Esophagus,Fetal_Adrenal_Gland,Fetal_Intestine_Large,Fetal_Intestine_Small,Fetal_Muscle_Leg,Fetal_Muscle_Tru…	ADRENAL,BLOOD,BONE,BRAIN,BREAST,CERVIX,ENDODERM,ESC,FAT,GI_COLON,GI_DUODENUM,GI_ESOPHAGUS,GI_INTESTINE,GI_RECTUM,GI_STOMACH,HEART,LIVER,LUNG,MUSCLE,MUSCLE_LEG,SKIN,SPLEEN,STRONAL_CONNECTIVE,THYMUS,VASCULAR,iPSC	.	.	.		.	C	T	T	NA	T	T/T,T/T	rs574561555	AF=0.00319489	-0.48	-0.552	0.249	0	0	0.006	.	.	9.007	0.166803	.	CXCL3
chr4	74905215	74905216	SNP	5	TFBS,enhancer,motif_alter,openChrom,promoter	KDM5B,MYC,POLR2A,RCOR1,REST,TBP,ZNF263	.	MOTIFG=ETV4_1#74905210#74905217#+#7#7.914#4.022,SPI1_known2#74905210#74905217#-#1#8.458#6.821	.	.	Primary_monocytes_from_peripheral_blood	BLOOD	A549_EtOH_0.02pct_Lung_Carcinoma_Cell_Line,Adipose_Derived_Mesenchymal_Stem_Cell_Cultured_Cells,Adipose_Nuclei,Bone_Marrow_Derived_Cultured_Mesenchymal_Stem_Cells,Brain_Angular_Gyrus,Brain_Anterior_Caudate,Brain_Cingulate_Gyrus,Brain_Dorsolateral_Prefrontal_Cortex,Brain_Germinal_Matrix,Brain_Hippocampus_Middle,Brain_Inferior_Temporal_Lobe,Brain_Substantia_Nigra,Breast_Myoepithelial_Primary_Cells,…	ADRENAL,BLOOD,BONE,BRAIN,BREAST,CERVIX,ENDODERM,ESC,FAT,GI_COLON,GI_DUODENUM,GI_INTESTINE,GI_RECTUM,GI_STOMACH,HEART,LIVER,LUNG,MUSCLE,MUSCLE_LEG,PANCREAS,SKIN,STROMAL_CONNECTIVE,STRONAL_CONNECTIVE,THYMUS,VASCULAR,iPSC	A549_EtOH_0.02pct_Lung_Carcinoma_Cell_Line,Adipose_Nuclei,Fetal_Intestine_Large,Foreskin_Fibroblast_Primary_Cells_skin01,Foreskin_Fibroblast_Primary_Cells_skin02,HMEC_Mammary_Epithelial_Primary_Cells,HSMM_Skeletal_Muscle_Myoblasts_Cells,HeLa-S3_Cervical_Carcinoma_Cell_Line,IMR90_fetal_lung_fibroblasts_Cell_Line,K562_Leukemia_Cells,Liver,Lung,NHDF-Ad_Adult_Dermal_Fibroblast_Primary_Cells,Primary_h…	BLOOD,BREAST,CERVIX,FAT,GI_INTESTINE,GI_RECTUM,LIVER,LUNG,MUSCLE,SKIN	.	.	.		.	C	T	T	NA	T	T/T,T/T	rs553830192	AF=0.00319489	-0.114	-0.132	-0.633	0	0	0.029	.	.	5.829	0.11394	.	CXCL3
chr4	114879374	114879375	SNP	5	TFBS,enhancer,motif_alter,openChrom,promoter	FOXP2,SIN3AK20	.	MOTIFBR=DHS#ATF4_3#114879367#114879381#+#9#0.000000#0.003231	.	.	Fetal_Lung,Fetal_Muscle_Trunk,Foreskin_Fibroblast_Primary_Cells_skin01,Foreskin_Fibroblast_Primary_Cells_skin02,IMR90_fetal_lung_fibroblasts_Cell_Line,Ovary	LUNG,MUSCLE,OVARY,SKIN	A549_EtOH_0.02pct_Lung_Carcinoma_Cell_Line,Muscle_Satellite_Cultured_Cells	LUNG,MUSCLE	A549_EtOH_0.02pct_Lung_Carcinoma_Cell_Line,Bone_Marrow_Derived_Cultured_Mesenchymal_Stem_Cells,Foreskin_Fibroblast_Primary_Cells_skin01,H1_Derived_Mesenchymal_Stem_Cells,HSMM_Skeletal_Muscle_Myoblasts_Cells,HUVEC_Umbilical_Vein_Endothelial_Primary_Cells,IMR90_fetal_lung_fibroblasts_Cell_Line,Lung,Mesenchymal_Stem_Cell_Derived_Chondrocyte_Cultured_Cells,NH-A_Astrocytes_Primary_Cells,NHLF_Lung_Fibr…	BONE,BRAIN,ENDODERM,GI_RECTUM,LUNG,MUSCLE,SKIN,STROMAL_CONNECTIVE,STRONAL_CONNECTIVE,VASCULAR,iPSC	.	.	.		.	C	T	T	T	T	T/T,T/T	rs74980454	AF=0.0391374	-0.545	-0.908	0.53	0	0	0.379	.	.	11.67	0.093781	5	ARSJ,CAMK2D
chr4	114898823	114898824	SNP	5	TFBS,enhancer,motif_alter,openChrom,promoter	REST	.	MOTIFBR=DHS,REST#POU2F2_known13#114898805#114898827#-#3#0.177589#0.342194,DHS#SOX7_1#114898819#114898841#+#6#0.211081#0.274393	.	.	H1_Derived_Mesenchymal_Stem_Cells	STROMAL_CONNECTIVE	A549_EtOH_0.02pct_Lung_Carcinoma_Cell_Line,Adipose_Derived_Mesenchymal_Stem_Cell_Cultured_Cells,Aorta,Bone_Marrow_Derived_Cultured_Mesenchymal_Stem_Cells,Brain_Angular_Gyrus,Brain_Anterior_Caudate,Brain_Cingulate_Gyrus,Brain_Dorsolateral_Prefrontal_Cortex,Brain_Inferior_Temporal_Lobe,Breast_Myoepithelial_Primary_Cells,Breast_variant_Human_Mammary_Epithelial_Cells_(vHMEC),Colon_Smooth_Muscle,Corte…	BONE,BRAIN,BREAST,CERVIX,ESC,FAT,GI_COLON,GI_DUODENUM,GI_INTESTINE,GI_RECTUM,GI_STOMACH,HEART,KIDNEY,LIVER,LUNG,MUSCLE,OVARY,PANCREAS,PLACENTA,SKIN,STROMAL_CONNECTIVE,STRONAL_CONNECTIVE,VASCULAR,iPSC	A549_EtOH_0.02pct_Lung_Carcinoma_Cell_Line,Bone_Marrow_Derived_Cultured_Mesenchymal_Stem_Cells,Brain_Anterior_Caudate,Brain_Cingulate_Gyrus,Brain_Inferior_Temporal_Lobe,Colon_Smooth_Muscle,Colonic_Mucosa,Fetal_Intestine_Large,Fetal_Intestine_Small,Fetal_Muscle_Leg,Fetal_Muscle_Trunk,Foreskin_Fibroblast_Primary_Cells_skin01,Foreskin_Fibroblast_Primary_Cells_skin02,Foreskin_Melanocyte_Primary_Cells…	BONE,BRAIN,BREAST,GI_COLON,GI_INTESTINE,LIVER,LUNG,MUSCLE,MUSCLE_LEG,SKIN,STROMAL_CONNECTIVE,STRONAL_CONNECTIVE,VASCULAR	.	.	.		.	T	G	G	G	G	G/G,G/G	rs74646734	AF=0.04373	-0.179	-0.385	-0.18	0.002	0	0.006	.	.	2.311	0.119682	5	ARSJ,CAMK2D
chr4	119733285	119733286	SNP	5	eQTL,enhancer,motif_alter,openChrom,promoter	.	.	MOTIFG=NKX2-5_1#119733286#119733293#-#7#8.415#4.173	Adipose_Visceral	.	Pancreas	PANCREAS	Foreskin_Fibroblast_Primary_Cells_skin01,Mesenchymal_Stem_Cell_Derived_Chondrocyte_Cultured_Cells	SKIN,STROMAL_CONNECTIVE	Aorta,Bone_Marrow_Derived_Cultured_Mesenchymal_Stem_Cells,Foreskin_Fibroblast_Primary_Cells_skin01,Foreskin_Fibroblast_Primary_Cells_skin02,HSMM_cell_derived_Skeletal_Muscle_Myotubes_Cells,IMR90_fetal_lung_fibroblasts_Cell_Line,Liver,Mesenchymal_Stem_Cell_Derived_Chondrocyte_Cultured_Cells,NHDF-Ad_Adult_Dermal_Fibroblast_Primary_Cells,NHLF_Lung_Fibroblast_Primary_Cells,Osteoblast_Primary_Cells,Sk…	BONE,LIVER,LUNG,MUSCLE,SKIN,STROMAL_CONNECTIVE,STRONAL_CONNECTIVE,VASCULAR	.	.	.		.	G	C	C	C	C	C/C,C/C	rs115485705	AF=0.01877	-0.869	-0.913	-2.677	0	0	0	.	.	0.028	0.106106	5	METTL14,SEC24D
chr4	119744621	119744622	SNP	5	TFBS,eQTL,enhancer,openChrom,promoter	EP300,FOXA1,MYC,POLR2A,STAT3,TCF7L2,TFAP2C	.	.	Adipose_Visceral,Thyroid	.	Breast_variant_Human_Mammary_Epithelial_Cells_(vHMEC)	BREAST	Foreskin_Fibroblast_Primary_Cells_skin02	SKIN	Bone_Marrow_Derived_Cultured_Mesenchymal_Stem_Cells,Esophagus,Fetal_Intestine_Small,Foreskin_Fibroblast_Primary_Cells_skin02,Liver,Mesenchymal_Stem_Cell_Derived_Chondrocyte_Cultured_Cells,Monocytes-CD14+_RO01746_Primary_Cells,Osteoblast_Primary_Cells,Pancreas,Pancreatic_Islets,Primary_hematopoietic_stem_cells_G-CSF-mobilized_Female,Rectal_Mucosa_Donor_29,Rectal_Mucosa_Donor_31,Small_Intestine	BLOOD,BONE,GI_ESOPHAGUS,GI_INTESTINE,GI_RECTUM,LIVER,PANCREAS,SKIN,STROMAL_CONNECTIVE,STRONAL_CONNECTIVE	.	.	.		.	C	T	T	T	T	T/T,T/T	rs115994240	AF=0.01877	-0.343	-0.355	-2.041	0	0	0	.	.	1.689	0.062308	4	METTL14,SEC24D
chr4	119746531	119746532	SNP	5	eQTL,enhancer,motif_alter,openChrom,promoter	.	.	MOTIFBR=DHS#MYBL2_1#119746527#119746541#-#9#0.060032#0.113744	Adipose_Visceral	.	Foreskin_Fibroblast_Primary_Cells_skin01	SKIN	GM12878_Lymphoblastoid_Cells	BLOOD	Aorta,Bone_Marrow_Derived_Cultured_Mesenchymal_Stem_Cells,Fetal_Intestine_Large,Fetal_Intestine_Small,HUES48_Cells,HUES6_Cells,Liver,Mesenchymal_Stem_Cell_Derived_Chondrocyte_Cultured_Cells,Monocytes-CD14+_RO01746_Primary_Cells,Small_Intestine	BLOOD,ESC,GI_INTESTINE,LIVER,STROMAL_CONNECTIVE,STRONAL_CONNECTIVE,VASCULAR	.	.	.		.	G	A	A	A	A	A/A,A/A	rs112097820	AF=0.01877	0.055	0.021	0.374	0	0	0.045	.	.	4.052	0.062308	5	METTL14,SEC24D
chr4	119756279	119756280	SNP	5	TFBS,eQTL,enhancer,openChrom,promoter	BACH1,CBX3,ELF1,FOS,KDM5B,MXI1,MYBL2,NFIC,NFYB,PAX5,PBX3,PML,POLR2A,POU2F2,RELA,SIN3A,SIN3AK20,STAT5A,TAF1,TBP	.	.	Adipose_Visceral,Whole_Blood	.	.	.	A549_EtOH_0.02pct_Lung_Carcinoma_Cell_Line,Adipose_Derived_Mesenchymal_Stem_Cell_Cultured_Cells,Adipose_Nuclei,Aorta,Bone_Marrow_Derived_Cultured_Mesenchymal_Stem_Cells,Brain_Angular_Gyrus,Brain_Anterior_Caudate,Brain_Cingulate_Gyrus,Brain_Dorsolateral_Prefrontal_Cortex,Brain_Germinal_Matrix,Brain_Hippocampus_Middle,Brain_Inferior_Temporal_Lobe,Brain_Substantia_Nigra,Breast_Myoepithelial_Primary_…	ADRENAL,BLOOD,BONE,BRAIN,BREAST,CERVIX,ENDODERM,ESC,FAT,GI_COLON,GI_DUODENUM,GI_ESOPHAGUS,GI_INTESTINE,GI_RECTUM,GI_STOMACH,HEART,KIDNEY,LIVER,LUNG,MUSCLE,MUSCLE_LEG,OVARY,PANCREAS,PLACENTA,SKIN,STROMAL_CONNECTIVE,STRONAL_CONNECTIVE,THYMUS,Trophoblast,VASCULAR,iPSC	.	.	.	.	.		.	G	T	T	T	T	T/T,T/T	rs116514715	AF=0.01877	2.352	1.785	0.452	1	0.999	0.716	380.9	1.56894e-28	15.76	0.163419	4	METTL14,SEC24D
chr4	119756280	119756281	SNP	5	TFBS,eQTL,enhancer,openChrom,promoter	BACH1,CBX3,ELF1,FOS,KDM5B,MXI1,MYBL2,NFIC,NFYB,PAX5,PBX3,PML,POLR2A,POU2F2,RELA,SIN3A,SIN3AK20,STAT5A,TAF1,TBP	.	.	Adipose_Visceral,Whole_Blood	.	Fetal_Adrenal_Gland,Fetal_Kidney,Fetal_Muscle_Leg,Fetal_Muscle_Trunk,Foreskin_Keratinocyte_Primary_Cells_skin02,H1_BMP4_Derived_Mesendoderm_Cultured_Cells,H1_BMP4_Derived_Trophoblast_Cultured_Cells,H1_Cells,H1_Derived_Neuronal_Progenitor_Cultured_Cells,Ovary,Pancreas,iPS_DF_6.9_Cells	ADRENAL,BRAIN,ESC,KIDNEY,MUSCLE,MUSCLE_LEG,Mesendoderm,OVARY,PANCREAS,SKIN,Trophoblast,iPSC	A549_EtOH_0.02pct_Lung_Carcinoma_Cell_Line,Adipose_Derived_Mesenchymal_Stem_Cell_Cultured_Cells,Adipose_Nuclei,Aorta,Bone_Marrow_Derived_Cultured_Mesenchymal_Stem_Cells,Brain_Angular_Gyrus,Brain_Anterior_Caudate,Brain_Cingulate_Gyrus,Brain_Dorsolateral_Prefrontal_Cortex,Brain_Germinal_Matrix,Brain_Hippocampus_Middle,Brain_Inferior_Temporal_Lobe,Brain_Substantia_Nigra,Breast_Myoepithelial_Primary_…	ADRENAL,BLOOD,BONE,BRAIN,BREAST,CERVIX,ENDODERM,ESC,FAT,GI_COLON,GI_DUODENUM,GI_ESOPHAGUS,GI_INTESTINE,GI_RECTUM,GI_STOMACH,HEART,KIDNEY,LIVER,LUNG,MUSCLE,MUSCLE_LEG,OVARY,PANCREAS,PLACENTA,SKIN,STROMAL_CONNECTIVE,STRONAL_CONNECTIVE,THYMUS,Trophoblast,VASCULAR,iPSC	A549_EtOH_0.02pct_Lung_Carcinoma_Cell_Line,Adipose_Nuclei,Aorta,Bone_Marrow_Derived_Cultured_Mesenchymal_Stem_Cells,Brain_Angular_Gyrus,Brain_Anterior_Caudate,Brain_Cingulate_Gyrus,Brain_Dorsolateral_Prefrontal_Cortex,Brain_Hippocampus_Middle,Brain_Inferior_Temporal_Lobe,Brain_Substantia_Nigra,Colon_Smooth_Muscle,Colonic_Mucosa,Dnd41_TCell_Leukemia_Cell_Line,Duodenum_Smooth_Muscle,Esophagus,Fetal…	ADRENAL,BLOOD,BONE,BRAIN,BREAST,CERVIX,ENDODERM,ESC,FAT,GI_COLON,GI_DUODENUM,GI_ESOPHAGUS,GI_INTESTINE,GI_RECTUM,GI_STOMACH,HEART,LIVER,LUNG,MUSCLE,MUSCLE_LEG,Mesendoderm,OVARY,PANCREAS,PLACENTA,SKIN,SPLEEN,STROMAL_CONNECTIVE,STRONAL_CONNECTIVE,THYMUS,Trophoblast,VASCULAR,iPSC	.	.	.		.	G	T	T	T	T	T/T,T/T	rs116514715	AF=0.01877	2.352	1.785	0.452	1	0.999	0.716	380.9	1.56894e-28	.	0.163419	4	METTL14,SEC24D
chr4	119756406	119756407	SNP	5	TFBS,eQTL,enhancer,openChrom,promoter	BACH1,CBX3,CHD1,ELF1,FOS,KDM5B,MAFF,MAFK,MXI1,MYBL2,NFIC,NFYB,PAX5,PBX3,PML,POLR2A,POU2F2,RELA,SIN3A,SIN3AK20,SPI1,STAT5A,TAF1,TBP	.	.	Adipose_Visceral	.	Breast_variant_Human_Mammary_Epithelial_Cells_(vHMEC),Fetal_Brain_Female,Fetal_Brain_Male,Fetal_Heart,Fetal_Intestine_Large,Fetal_Intestine_Small,Fetal_Lung,Fetal_Stomach,Fetal_Thymus,Foreskin_Fibroblast_Primary_Cells_skin01,Foreskin_Fibroblast_Primary_Cells_skin02,Foreskin_Melanocyte_Primary_Cells_skin01,Gastric,H1_BMP4_Derived_Mesendoderm_Cultured_Cells,H1_Cells,H1_Derived_Mesenchymal_Stem_Cell…	BLOOD,BRAIN,BREAST,ESC,GI_INTESTINE,GI_STOMACH,HEART,LUNG,MUSCLE,Mesendoderm,OVARY,PLACENTA,SKIN,STROMAL_CONNECTIVE,THYMUS,iPSC	A549_EtOH_0.02pct_Lung_Carcinoma_Cell_Line,Adipose_Derived_Mesenchymal_Stem_Cell_Cultured_Cells,Adipose_Nuclei,Aorta,Bone_Marrow_Derived_Cultured_Mesenchymal_Stem_Cells,Brain_Angular_Gyrus,Brain_Anterior_Caudate,Brain_Cingulate_Gyrus,Brain_Dorsolateral_Prefrontal_Cortex,Brain_Germinal_Matrix,Brain_Hippocampus_Middle,Brain_Inferior_Temporal_Lobe,Brain_Substantia_Nigra,Breast_Myoepithelial_Primary_…	ADRENAL,BLOOD,BONE,BRAIN,BREAST,CERVIX,ENDODERM,ESC,FAT,GI_COLON,GI_DUODENUM,GI_ESOPHAGUS,GI_INTESTINE,GI_RECTUM,GI_STOMACH,HEART,KIDNEY,LIVER,LUNG,MUSCLE,MUSCLE_LEG,Mesendoderm,OVARY,PANCREAS,PLACENTA,SKIN,SPLEEN,STROMAL_CONNECTIVE,STRONAL_CONNECTIVE,THYMUS,Trophoblast,VASCULAR,iPSC	A549_EtOH_0.02pct_Lung_Carcinoma_Cell_Line,Adipose_Nuclei,Aorta,Bone_Marrow_Derived_Cultured_Mesenchymal_Stem_Cells,Brain_Angular_Gyrus,Brain_Cingulate_Gyrus,Brain_Dorsolateral_Prefrontal_Cortex,Brain_Hippocampus_Middle,Brain_Inferior_Temporal_Lobe,Brain_Substantia_Nigra,Colon_Smooth_Muscle,Colonic_Mucosa,Dnd41_TCell_Leukemia_Cell_Line,Duodenum_Smooth_Muscle,Esophagus,Fetal_Adrenal_Gland,Fetal_In…	ADRENAL,BLOOD,BONE,BRAIN,BREAST,CERVIX,ENDODERM,ESC,FAT,GI_COLON,GI_DUODENUM,GI_ESOPHAGUS,GI_INTESTINE,GI_RECTUM,GI_STOMACH,HEART,LIVER,LUNG,MUSCLE,MUSCLE_LEG,Mesendoderm,OVARY,PANCREAS,PLACENTA,SKIN,SPLEEN,STROMAL_CONNECTIVE,STRONAL_CONNECTIVE,THYMUS,Trophoblast,VASCULAR,iPSC	.	.	.		.	T	G	G	G	G	G/G,G/G	rs114938162	AF=0.01877	0.519	0.341	0.553	0.001	0.002	0.052	380.9	1.56894e-28	6.995	0.163419	4	SEC24D
chr4	119756936	119756937	SNP	5	TFBS,eQTL,enhancer,openChrom,promoter	BACH1,CCNT2,CHD1,EGR1,HDAC1,NFIC,PHF8,POLR2A,RBBP5,RCOR1,SAP30,SIN3A,SIN3AK20,ZEB1,ZNF263	.	.	Adipose_Visceral	.	Fetal_Kidney,Fetal_Muscle_Leg,Fetal_Muscle_Trunk,Foreskin_Fibroblast_Primary_Cells_skin02,H1_BMP4_Derived_Mesendoderm_Cultured_Cells,H9_Cells,iPS_DF_19.11_Cells	ESC,KIDNEY,MUSCLE,MUSCLE_LEG,Mesendoderm,SKIN,iPSC	A549_EtOH_0.02pct_Lung_Carcinoma_Cell_Line,Adipose_Derived_Mesenchymal_Stem_Cell_Cultured_Cells,Adipose_Nuclei,Aorta,Bone_Marrow_Derived_Cultured_Mesenchymal_Stem_Cells,Brain_Angular_Gyrus,Brain_Anterior_Caudate,Brain_Cingulate_Gyrus,Brain_Dorsolateral_Prefrontal_Cortex,Brain_Germinal_Matrix,Brain_Hippocampus_Middle,Brain_Inferior_Temporal_Lobe,Brain_Substantia_Nigra,Breast_Myoepithelial_Primary_…	ADRENAL,BLOOD,BONE,BRAIN,BREAST,CERVIX,ENDODERM,ESC,FAT,GI_COLON,GI_DUODENUM,GI_ESOPHAGUS,GI_INTESTINE,GI_RECTUM,GI_STOMACH,HEART,KIDNEY,LIVER,LUNG,MUSCLE,MUSCLE_LEG,Mesendoderm,OVARY,PANCREAS,PLACENTA,SKIN,SPLEEN,STROMAL_CONNECTIVE,STRONAL_CONNECTIVE,THYMUS,Trophoblast,VASCULAR,iPSC	A549_EtOH_0.02pct_Lung_Carcinoma_Cell_Line,Adipose_Nuclei,Aorta,Bone_Marrow_Derived_Cultured_Mesenchymal_Stem_Cells,Brain_Angular_Gyrus,Brain_Anterior_Caudate,Brain_Cingulate_Gyrus,Brain_Dorsolateral_Prefrontal_Cortex,Brain_Hippocampus_Middle,Brain_Inferior_Temporal_Lobe,Brain_Substantia_Nigra,Colon_Smooth_Muscle,Colonic_Mucosa,Dnd41_TCell_Leukemia_Cell_Line,Duodenum_Smooth_Muscle,Esophagus,Fetal…	ADRENAL,BLOOD,BONE,BRAIN,BREAST,CERVIX,ENDODERM,ESC,FAT,GI_COLON,GI_DUODENUM,GI_ESOPHAGUS,GI_INTESTINE,GI_RECTUM,GI_STOMACH,HEART,LIVER,LUNG,MUSCLE,MUSCLE_LEG,Mesendoderm,OVARY,PANCREAS,PLACENTA,SKIN,SPLEEN,STROMAL_CONNECTIVE,STRONAL_CONNECTIVE,THYMUS,Trophoblast,VASCULAR,iPSC	.	.	.		.	G	A	A	A	A	A/A,A/A	rs114970257	AF=0.0215655	1.666	1.229	0.255	0.001	0.001	0.009	.	.	7.236	0	4	SEC24D
chr4	119757391	119757392	SNP	5	TFBS,eQTL,enhancer,openChrom,promoter	ATF2,CCNT2,CEBPD,CHD1,CTCF,E2F1,E2F4,ELF1,ETS1,FOXP2,HDAC1,HDAC2,HMGN3,KDM5B,MAX,MAZ,MTA3,MXI1,MYBL2,MYC,NFYB,NRF1,PML,POLR2A,RBBP5,RELA,SAP30,SIN3A,SIN3AK20,TAF1,TBP,TCF12,TCF3,TCF7L2,UBTF,YY1,ZNF263	.	.	Adipose_Visceral	.	H1_Cells,H1_Derived_Neuronal_Progenitor_Cultured_Cells,Primary_Natural_Killer_cells_from_peripheral_blood,Primary_T_cells_from_cord_blood,Primary_T_cells_from_peripheral_blood	BLOOD,BRAIN,ESC	A549_EtOH_0.02pct_Lung_Carcinoma_Cell_Line,Adipose_Derived_Mesenchymal_Stem_Cell_Cultured_Cells,Adipose_Nuclei,Bone_Marrow_Derived_Cultured_Mesenchymal_Stem_Cells,Brain_Angular_Gyrus,Brain_Anterior_Caudate,Brain_Cingulate_Gyrus,Brain_Dorsolateral_Prefrontal_Cortex,Brain_Germinal_Matrix,Brain_Hippocampus_Middle,Brain_Inferior_Temporal_Lobe,Brain_Substantia_Nigra,Breast_Myoepithelial_Primary_Cells,…	ADRENAL,BLOOD,BONE,BRAIN,BREAST,CERVIX,ENDODERM,ESC,FAT,GI_COLON,GI_DUODENUM,GI_ESOPHAGUS,GI_INTESTINE,GI_RECTUM,GI_STOMACH,HEART,KIDNEY,LIVER,LUNG,MUSCLE,MUSCLE_LEG,OVARY,PANCREAS,PLACENTA,SKIN,SPLEEN,STROMAL_CONNECTIVE,STRONAL_CONNECTIVE,THYMUS,VASCULAR,iPSC	A549_EtOH_0.02pct_Lung_Carcinoma_Cell_Line,Adipose_Nuclei,Bone_Marrow_Derived_Cultured_Mesenchymal_Stem_Cells,Brain_Hippocampus_Middle,Duodenum_Smooth_Muscle,Fetal_Intestine_Small,Fetal_Stomach,Foreskin_Fibroblast_Primary_Cells_skin01,Foreskin_Fibroblast_Primary_Cells_skin02,Foreskin_Keratinocyte_Primary_Cells_skin03,Foreskin_Melanocyte_Primary_Cells_skin03,GM12878_Lymphoblastoid_Cells,HMEC_Mamma…	BLOOD,BONE,BRAIN,BREAST,CERVIX,ENDODERM,ESC,FAT,GI_DUODENUM,GI_INTESTINE,GI_RECTUM,GI_STOMACH,LIVER,LUNG,MUSCLE,SKIN,SPLEEN,STROMAL_CONNECTIVE,STRONAL_CONNECTIVE,VASCULAR,iPSC	.	.	.		.	T	A	A	A	A	A/A,A/A	rs140120423	AF=0.019369	-1.951	-2.043	-0.872	0	0	0.001	.	.	7.219	0	.	SEC24D
chr4	119771451	119771452	SNP	5	TFBS,eQTL,enhancer,openChrom,promoter	BCL11A,HDAC2,NANOG,YY1	.	.	Adipose_Visceral,fibroblasts	.	H1_BMP4_Derived_Mesendoderm_Cultured_Cells,H9_Cells,iPS_DF_19.11_Cells,iPS_DF_6.9_Cells	ESC,Mesendoderm,iPSC	Adipose_Derived_Mesenchymal_Stem_Cell_Cultured_Cells,Adipose_Nuclei,Aorta,Bone_Marrow_Derived_Cultured_Mesenchymal_Stem_Cells,Brain_Angular_Gyrus,Brain_Anterior_Caudate,Brain_Hippocampus_Middle,Brain_Inferior_Temporal_Lobe,Brain_Substantia_Nigra,Colon_Smooth_Muscle,Colonic_Mucosa,Dnd41_TCell_Leukemia_Cell_Line,Duodenum_Mucosa,Duodenum_Smooth_Muscle,ES-UCSF4_Cells,ES-WA7_Cells,Fetal_Kidney,Foreski…	BLOOD,BONE,BRAIN,ENDODERM,ESC,FAT,GI_COLON,GI_DUODENUM,GI_RECTUM,GI_STOMACH,HEART,KIDNEY,LUNG,OVARY,PANCREAS,SKIN,STROMAL_CONNECTIVE,STRONAL_CONNECTIVE,VASCULAR,iPSC	Brain_Dorsolateral_Prefrontal_Cortex,Dnd41_TCell_Leukemia_Cell_Line,Foreskin_Fibroblast_Primary_Cells_skin01,H9_Cells,HUES48_Cells,HUES64_Cells,HUES6_Cells,Primary_Natural_Killer_cells_from_peripheral_blood,Primary_T_cells_from_peripheral_blood,Primary_T_helper_17_cells_PMA-I_stimulated,Primary_T_helper_cells_PMA-I_stimulated,Primary_T_helper_memory_cells_from_peripheral_blood_1,Primary_T_helper_…	BLOOD,BRAIN,ENDODERM,ESC,SKIN,SPLEEN,iPSC	.	.	.		.	C	T	T	T	T	T/T,T/T	rs114390336	AF=0.0167732	-0.031	-0.053	-0.351	0.004	0.003	0.001	.	.	5.64	0.078958	4	SEC24D,SYNPO2
chr4	146018769	146018770	SNP	5	DE_gene,TFBS,enhancer,openChrom,promoter	CHD1	.	.	.	.	Fetal_Muscle_Trunk,Ovary,Primary_T_cells_from_peripheral_blood	BLOOD,MUSCLE,OVARY	A549_EtOH_0.02pct_Lung_Carcinoma_Cell_Line,Adipose_Derived_Mesenchymal_Stem_Cell_Cultured_Cells,Adipose_Nuclei,Aorta,Bone_Marrow_Derived_Cultured_Mesenchymal_Stem_Cells,Brain_Angular_Gyrus,Brain_Anterior_Caudate,Brain_Cingulate_Gyrus,Brain_Dorsolateral_Prefrontal_Cortex,Brain_Germinal_Matrix,Brain_Hippocampus_Middle,Brain_Inferior_Temporal_Lobe,Brain_Substantia_Nigra,Breast_Myoepithelial_Primary_…	ADRENAL,BLOOD,BONE,BRAIN,BREAST,CERVIX,ENDODERM,ESC,FAT,GI_COLON,GI_DUODENUM,GI_ESOPHAGUS,GI_INTESTINE,GI_RECTUM,GI_STOMACH,HEART,KIDNEY,LIVER,LUNG,MUSCLE,MUSCLE_LEG,Mesendoderm,OVARY,PANCREAS,PLACENTA,SKIN,STROMAL_CONNECTIVE,STRONAL_CONNECTIVE,THYMUS,Trophoblast,VASCULAR,iPSC	A549_EtOH_0.02pct_Lung_Carcinoma_Cell_Line,Adipose_Nuclei,Aorta,Bone_Marrow_Derived_Cultured_Mesenchymal_Stem_Cells,Brain_Angular_Gyrus,Brain_Anterior_Caudate,Brain_Cingulate_Gyrus,Brain_Dorsolateral_Prefrontal_Cortex,Brain_Hippocampus_Middle,Brain_Inferior_Temporal_Lobe,Brain_Substantia_Nigra,Colon_Smooth_Muscle,Colonic_Mucosa,Dnd41_TCell_Leukemia_Cell_Line,Duodenum_Smooth_Muscle,Esophagus,Fetal…	ADRENAL,BLOOD,BONE,BRAIN,BREAST,CERVIX,ENDODERM,ESC,FAT,GI_COLON,GI_DUODENUM,GI_ESOPHAGUS,GI_INTESTINE,GI_RECTUM,GI_STOMACH,HEART,LIVER,LUNG,MUSCLE,MUSCLE_LEG,Mesendoderm,PANCREAS,PLACENTA,SKIN,SPLEEN,STROMAL_CONNECTIVE,STRONAL_CONNECTIVE,THYMUS,VASCULAR,iPSC	.	.	ANAPC10	testis	.	C	T	T	T	T	T/T,T/T	rs33923494	AF=0.00379393	-0.126	-0.159	0.457	0	0	0.231	.	.	10.81	0.085055	5	ABCE1,ANAPC10
chr4	153272470	153272471	SNP	5	DE_gene,TFBS,enhancer,openChrom,promoter	CTCF	.	.	.	.	Fetal_Heart,Foreskin_Keratinocyte_Primary_Cells_skin02	HEART,SKIN	Adipose_Derived_Mesenchymal_Stem_Cell_Cultured_Cells,Adipose_Nuclei,Bone_Marrow_Derived_Cultured_Mesenchymal_Stem_Cells,Brain_Angular_Gyrus,Brain_Anterior_Caudate,Brain_Cingulate_Gyrus,Brain_Dorsolateral_Prefrontal_Cortex,Brain_Germinal_Matrix,Brain_Hippocampus_Middle,Brain_Inferior_Temporal_Lobe,Breast_Myoepithelial_Primary_Cells,Breast_variant_Human_Mammary_Epithelial_Cells_(vHMEC),Cortex_deriv…	BLOOD,BONE,BRAIN,BREAST,ENDODERM,FAT,GI_DUODENUM,GI_INTESTINE,GI_STOMACH,HEART,LUNG,MUSCLE,OVARY,PANCREAS,SKIN,STROMAL_CONNECTIVE,STRONAL_CONNECTIVE,THYMUS,VASCULAR	Adipose_Nuclei,Brain_Angular_Gyrus,Brain_Dorsolateral_Prefrontal_Cortex,Brain_Hippocampus_Middle,Dnd41_TCell_Leukemia_Cell_Line,Duodenum_Smooth_Muscle,Esophagus,Foreskin_Keratinocyte_Primary_Cells_skin03,HMEC_Mammary_Epithelial_Primary_Cells,Mesenchymal_Stem_Cell_Derived_Chondrocyte_Cultured_Cells,NHEK-Epidermal_Keratinocyte_Primary_Cells	BLOOD,BRAIN,BREAST,FAT,GI_DUODENUM,GI_ESOPHAGUS,SKIN,STROMAL_CONNECTIVE	.	.	FBXW7	kidney	.	A	G	G	G	G	G/G,G/G	rs75371162	AF=0.0151757	0.826	1.044	0.486	0.003	0.002	0.002	933.1	7.40601e-43	5.009	0.125411	5	FBXW7,PET112L
chr5	138607446	138607447	SNP	5	DE_gene,TFBS,enhancer,openChrom,promoter	GATA2,MAX,USF1,USF2	.	.	.	.	H1_BMP4_Derived_Mesendoderm_Cultured_Cells	Mesendoderm	A549_EtOH_0.02pct_Lung_Carcinoma_Cell_Line,NH-A_Astrocytes_Primary_Cells,Primary_hematopoietic_stem_cells_G-CSF-mobilized_Female,Rectal_Smooth_Muscle,iPS-15b_Cells	BLOOD,BRAIN,GI_RECTUM,LUNG,iPSC	A549_EtOH_0.02pct_Lung_Carcinoma_Cell_Line,Bone_Marrow_Derived_Cultured_Mesenchymal_Stem_Cells,Brain_Hippocampus_Middle,Brain_Inferior_Temporal_Lobe,Colonic_Mucosa,Duodenum_Smooth_Muscle,Esophagus,Foreskin_Fibroblast_Primary_Cells_skin01,Foreskin_Fibroblast_Primary_Cells_skin02,Foreskin_Keratinocyte_Primary_Cells_skin03,H1_Derived_Mesenchymal_Stem_Cells,HSMM_Skeletal_Muscle_Myoblasts_Cells,HSMM_c…	BLOOD,BONE,BRAIN,GI_COLON,GI_DUODENUM,GI_ESOPHAGUS,GI_RECTUM,GI_STOMACH,HEART,LIVER,LUNG,MUSCLE,SKIN,STROMAL_CONNECTIVE,STRONAL_CONNECTIVE	.	.	SIL1	kidney	.	T	A	A	A	A	A/A,A/A	rs73253199	AF=0.0195687	-0.402	-0.471	0.375	0.011	0.007	0.514	.	.	11.08	0.086534	4	MATR3,SIL1
chr5	138678179	138678180	SNP	5	TFBS,enhancer,motif_alter,openChrom,promoter	ATF3,CHD2,E2F6,ELF1,FOXP2,JUND,MAX,MAZ,MXI1,MYC,NRF1,POLR2A,SIN3AK20,TAF7,TCF7L2,USF1,ZBTB7A	.	MOTIFBR=CCNT2,E2F6,HMGN3,MAX,MYC,NRF1,TAF1,TCF7L2#ZNF282_1#138678173#138678190#-#10#0.103641#0.717088	.	.	Breast_variant_Human_Mammary_Epithelial_Cells_(vHMEC),Fetal_Heart,Fetal_Muscle_Leg,Fetal_Thymus,H1_Derived_Mesenchymal_Stem_Cells,Primary_B_cells_from_peripheral_blood,Primary_Natural_Killer_cells_from_peripheral_blood,Primary_T_cells_from_cord_blood	BLOOD,BREAST,HEART,MUSCLE_LEG,STROMAL_CONNECTIVE,THYMUS	A549_EtOH_0.02pct_Lung_Carcinoma_Cell_Line,Adipose_Derived_Mesenchymal_Stem_Cell_Cultured_Cells,Adipose_Nuclei,Aorta,Bone_Marrow_Derived_Cultured_Mesenchymal_Stem_Cells,Brain_Angular_Gyrus,Brain_Anterior_Caudate,Brain_Cingulate_Gyrus,Brain_Dorsolateral_Prefrontal_Cortex,Brain_Germinal_Matrix,Brain_Hippocampus_Middle,Brain_Inferior_Temporal_Lobe,Brain_Substantia_Nigra,Breast_Myoepithelial_Primary_…	ADRENAL,BLOOD,BONE,BRAIN,BREAST,CERVIX,ENDODERM,ESC,FAT,GI_COLON,GI_DUODENUM,GI_ESOPHAGUS,GI_INTESTINE,GI_RECTUM,GI_STOMACH,HEART,KIDNEY,LIVER,LUNG,MUSCLE,MUSCLE_LEG,Mesendoderm,OVARY,PANCREAS,PLACENTA,SKIN,SPLEEN,STROMAL_CONNECTIVE,STRONAL_CONNECTIVE,THYMUS,Trophoblast,VASCULAR,iPSC	A549_EtOH_0.02pct_Lung_Carcinoma_Cell_Line,Adipose_Nuclei,Bone_Marrow_Derived_Cultured_Mesenchymal_Stem_Cells,Brain_Angular_Gyrus,Brain_Anterior_Caudate,Brain_Cingulate_Gyrus,Brain_Dorsolateral_Prefrontal_Cortex,Brain_Hippocampus_Middle,Brain_Inferior_Temporal_Lobe,Brain_Substantia_Nigra,Colon_Smooth_Muscle,Colonic_Mucosa,Dnd41_TCell_Leukemia_Cell_Line,Duodenum_Smooth_Muscle,Esophagus,Fetal_Adren…	ADRENAL,BLOOD,BONE,BRAIN,BREAST,CERVIX,ENDODERM,ESC,FAT,GI_COLON,GI_DUODENUM,GI_ESOPHAGUS,GI_INTESTINE,GI_RECTUM,GI_STOMACH,HEART,LIVER,LUNG,MUSCLE,MUSCLE_LEG,Mesendoderm,PANCREAS,PLACENTA,SKIN,SPLEEN,STROMAL_CONNECTIVE,STRONAL_CONNECTIVE,THYMUS,Trophoblast,VASCULAR,iPSC	.	.	.		.	T	C	C	C	C	C/C,C/C	rs73255251	AF=0.0195687	0.611	0.44	-0.511	0	0	0.003	.	.	4.944	0.046548	4	PAIP2
chr5	175918105	175918106	SNC	5	TFBS,enhancer,motif_alter,openChrom,promoter	BCL3,EP300,FOSL2,FOXA1,REST,TCF12,ZBTB33	.	MOTIFBR=DHS,FOXA1#CUX1_6#175918104#175918121#+#3#0.212077#0.513220	.	.	Gastric	GI_STOMACH	A549_EtOH_0.02pct_Lung_Carcinoma_Cell_Line	LUNG	A549_EtOH_0.02pct_Lung_Carcinoma_Cell_Line,Osteoblast_Primary_Cells	BONE,LUNG	.	.	.		.	C	T	T	T	T	T/T,T/T	.	0	0.15	0.105	0.525	0.002	0.001	0.052	492.6	2.81345e-64	5.362	0.106106	.	FAF2,RNF44
chr6	34452951	34452952	SNP	5	TFBS,enhancer,motif_alter,openChrom,promoter	ATF2,BATF,FOS,FOSL1,FOSL2,GABPA,JUN,JUNB,JUND,NFIC,POLR2A,ZBTB7A	.	MOTIFG=ZEB1_known5#34452947#34452953#-#1#6.794#3.667	.	.	Breast_variant_Human_Mammary_Epithelial_Cells_(vHMEC)	BREAST	Fetal_Thymus,Primary_T_cells_effector/memory_enriched_from_peripheral_blood,Primary_T_cells_from_peripheral_blood	BLOOD,THYMUS	Fetal_Thymus,Primary_T_cells_from_peripheral_blood,Primary_T_helper_naive_cells_from_peripheral_blood	BLOOD,THYMUS	.	.	.		.	T	G	G	G	G	G/G,G/G	rs571242998	AF=0.000798722	0.078	0.085	0.299	0.005	0.005	0.173	.	.	5.655	0.116174	.	PACSIN1,SPDEF
chr6	109460451	109460452	SNP	5	TFBS,TFBS_motif,enhancer,openChrom,promoter	CBX3,CEBPB,EP300,FOS,JUN,JUND,POLR2A,REST,STAT3,TAF1	CREB	.	.	.	Breast_variant_Human_Mammary_Epithelial_Cells_(vHMEC),Foreskin_Fibroblast_Primary_Cells_skin01,Foreskin_Fibroblast_Primary_Cells_skin02,Foreskin_Keratinocyte_Primary_Cells_skin02,H1_BMP4_Derived_Trophoblast_Cultured_Cells,IMR90_fetal_lung_fibroblasts_Cell_Line,Psoas_Muscle	BREAST,LUNG,MUSCLE,SKIN,Trophoblast	HMEC_Mammary_Epithelial_Primary_Cells,NH-A_Astrocytes_Primary_Cells	BRAIN,BREAST	Bone_Marrow_Derived_Cultured_Mesenchymal_Stem_Cells,HMEC_Mammary_Epithelial_Primary_Cells,HeLa-S3_Cervical_Carcinoma_Cell_Line,Mesenchymal_Stem_Cell_Derived_Chondrocyte_Cultured_Cells,NH-A_Astrocytes_Primary_Cells,Osteoblast_Primary_Cells	BONE,BRAIN,BREAST,CERVIX,STROMAL_CONNECTIVE,STRONAL_CONNECTIVE	.	.	.		.	A	G	G	G	G	G/G,G/G	rs74568326	AF=0.0199681	-0.79	-0.805	-0.789	0.007	0.006	0.006	.	.	0.46	0.078448	4	AK094715,C6orf182
chr6	112295575	112295576	SNC	5	TFBS,TFBS_motif,enhancer,motif_alter,openChrom	ESR1	ESR1	MOTIFBR=ESR1#RXRG_3#112295572#112295586#+#5#0.000000#0.001608,ESR1#HNF4_known23#112295572#112295587#+#5#0.006439#0.029288,ESR1#ESRRB_1#112295574#112295586#+#3#0.115226#0.331687,ESR1#ESRRA_known5#112295574#112295591#+#3#0.198119#0.260353,ESR1#ESRRA_known4#112295575#112295595#+#2#0.228632#0.350427,ESR1#ESRRA_known11#112295576#112295587#+#1#0.015574#0.209826,ESR1#ESRRA_known7#112295576#112295587#+#1…	.	.	Primary_monocytes_from_peripheral_blood	BLOOD	.	.	Bone_Marrow_Derived_Cultured_Mesenchymal_Stem_Cells,Fetal_Adrenal_Gland,Fetal_Intestine_Large,Fetal_Muscle_Leg,Fetal_Muscle_Trunk,Fetal_Stomach,Fetal_Thymus,Foreskin_Fibroblast_Primary_Cells_skin01,Foreskin_Fibroblast_Primary_Cells_skin02,Foreskin_Keratinocyte_Primary_Cells_skin03,HMEC_Mammary_Epithelial_Primary_Cells,HSMM_Skeletal_Muscle_Myoblasts_Cells,HSMM_cell_derived_Skeletal_Muscle_Myotubes…	ADRENAL,BLOOD,BONE,BRAIN,BREAST,ENDODERM,GI_INTESTINE,GI_STOMACH,HEART,LUNG,MUSCLE,MUSCLE_LEG,PLACENTA,SKIN,STROMAL_CONNECTIVE,STRONAL_CONNECTIVE,THYMUS,VASCULAR	.	.	.		.	G	A	A	A	A	A/A,A/A	.	0	-0.047	-0.035	0.457	0	0	0.027	.	.	3.841	0.084569	.	FYN,WISP3
chr6	143223801	143223802	SNP	5	TFBS,enhancer,motif_alter,openChrom,promoter	ATF2,BATF,FOXM1,GATA1,GATA2,MEF2A,NFATC1,POLR2A,RELA,SMC3,YY1	.	MOTIFBR=DHS,GATA1,GATA2,MEF2A,NFKB1#FOXJ3_4#143223799#143223812#-#10#0.019481#0.893938,DHS,GATA1,GATA2,MEF2A,NFKB1#NFAT5_1#143223800#143223814#-#12#0.000000#0.000347	.	.	Fetal_Thymus	THYMUS	A549_EtOH_0.02pct_Lung_Carcinoma_Cell_Line,Adipose_Derived_Mesenchymal_Stem_Cell_Cultured_Cells,Bone_Marrow_Derived_Cultured_Mesenchymal_Stem_Cells,Brain_Substantia_Nigra,Colon_Smooth_Muscle,Dnd41_TCell_Leukemia_Cell_Line,Foreskin_Melanocyte_Primary_Cells_skin03,Mesenchymal_Stem_Cell_Derived_Adipocyte_Cultured_Cells,Monocytes-CD14+_RO01746_Primary_Cells,Muscle_Satellite_Cultured_Cells,NHDF-Ad_Adu…	BLOOD,BONE,BRAIN,FAT,GI_COLON,LUNG,MUSCLE,SKIN,STRONAL_CONNECTIVE	A549_EtOH_0.02pct_Lung_Carcinoma_Cell_Line,Bone_Marrow_Derived_Cultured_Mesenchymal_Stem_Cells,Brain_Anterior_Caudate,Brain_Cingulate_Gyrus,Brain_Hippocampus_Middle,Brain_Inferior_Temporal_Lobe,Brain_Substantia_Nigra,Dnd41_TCell_Leukemia_Cell_Line,Fetal_Thymus,Foreskin_Fibroblast_Primary_Cells_skin01,Foreskin_Fibroblast_Primary_Cells_skin02,Foreskin_Keratinocyte_Primary_Cells_skin03,Foreskin_Mela…	BLOOD,BONE,BRAIN,BREAST,CERVIX,GI_INTESTINE,GI_RECTUM,HEART,LIVER,LUNG,MUSCLE,PLACENTA,SKIN,STROMAL_CONNECTIVE,STRONAL_CONNECTIVE,THYMUS,VASCULAR	.	.	.		.	T	C	C	C	C	C/C,C/C	rs9386013	AF=0.0419329	-0.528	-0.604	-1.862	0	0	0	.	.	0.243	0.108992	4	GPR126,HIVEP2
chr7	38438834	38438835	SNP	5	TFBS,eQTL,enhancer,motif_alter,promoter	CTCF	.	MOTIFBR=CTCF#FOXC1_6#38438824#38438835#-#0#0.004982#0.028470,CTCF#FOXA_known6#38438824#38438836#+#12#0.160648#0.242839,CTCF#FOXC1_2#38438828#38438836#-#1#0.187500#0.312500	Adipose_Subcutaneous,Esophagus_Muscularis,Muscle_Skeletal,Nerve_Tibial,Skin_Not_Sun_Exposed_Suprapubic,Skin_Sun_Exposed_Lower_leg	.	.	.	Brain_Anterior_Caudate,Brain_Cingulate_Gyrus,Brain_Hippocampus_Middle,Mesenchymal_Stem_Cell_Derived_Chondrocyte_Cultured_Cells,Pancreatic_Islets	BRAIN,PANCREAS,STROMAL_CONNECTIVE	Colon_Smooth_Muscle,Pancreatic_Islets	GI_COLON,PANCREAS	.	.	.		.	C	A	A	A	A	A/A,A/A	rs76080894	AF=0.0698882	-0.002	-0.035	0.457	0	0	0.013	.	.	4.983	0.070351	5	AMPH,TRGV3
chr7	55545523	55545524	SNP	5	TFBS,eQTL,enhancer,openChrom,promoter	CTCF	.	.	Nerve_Tibial	.	iPS_DF_19.11_Cells	iPSC	Foreskin_Fibroblast_Primary_Cells_skin01,Foreskin_Fibroblast_Primary_Cells_skin02,HSMM_Skeletal_Muscle_Myoblasts_Cells,Mesenchymal_Stem_Cell_Derived_Adipocyte_Cultured_Cells,Muscle_Satellite_Cultured_Cells,NH-A_Astrocytes_Primary_Cells,Osteoblast_Primary_Cells,Skeletal_Muscle_Female	BONE,BRAIN,FAT,MUSCLE,SKIN	Bone_Marrow_Derived_Cultured_Mesenchymal_Stem_Cells,Foreskin_Fibroblast_Primary_Cells_skin01,Foreskin_Fibroblast_Primary_Cells_skin02,H1_Derived_Mesenchymal_Stem_Cells,HSMM_Skeletal_Muscle_Myoblasts_Cells,HSMM_cell_derived_Skeletal_Muscle_Myotubes_Cells,IMR90_fetal_lung_fibroblasts_Cell_Line,Mesenchymal_Stem_Cell_Derived_Chondrocyte_Cultured_Cells,Monocytes-CD14+_RO01746_Primary_Cells,NH-A_Astroc…	BLOOD,BONE,BRAIN,LUNG,MUSCLE,SKIN,STROMAL_CONNECTIVE,STRONAL_CONNECTIVE	.	.	.		.	G	A	A	A	A	A/A,A/A	rs111757911	AF=0.00559105	0.293	0.282	-0.191	0.001	0.001	0.001	.	.	4.699	0.156188	5	LANCL2,VOPP1
chr7	55572000	55572001	SNP	5	TFBS,eQTL,enhancer,motif_alter,openChrom	RAD21	.	MOTIFBR=DHS,RAD21#AP3_1#55571998#55572006#-#5#0.363636#0.636364	Nerve_Tibial	.	Fetal_Thymus,H1_BMP4_Derived_Mesendoderm_Cultured_Cells,Primary_B_cells_from_peripheral_blood	BLOOD,Mesendoderm,THYMUS	.	.	Fetal_Thymus,Foreskin_Fibroblast_Primary_Cells_skin01,Foreskin_Keratinocyte_Primary_Cells_skin03,GM12878_Lymphoblastoid_Cells,NH-A_Astrocytes_Primary_Cells,NHEK-Epidermal_Keratinocyte_Primary_Cells,Primary_T_helper_cells_PMA-I_stimulated,Primary_T_regulatory_cells_from_peripheral_blood,Psoas_Muscle,Skeletal_Muscle_Female,hESC_Derived_CD56+_Ectoderm_Cultured_Cells	BLOOD,BRAIN,ENDODERM,MUSCLE,SKIN,THYMUS	.	.	.		.	T	G	G	G	G	G/G,G/G	rs117295114	AF=0.00519169	1.301	1.299	0.299	0.001	0.001	0.023	.	.	4.804	0.078485	2b	LANCL2,VOPP1
chr7	55573954	55573955	SNP	5	TFBS,eQTL,enhancer,openChrom,promoter	CEBPB,FOS,JUN,POLR2A	.	.	Nerve_Tibial	.	Breast_variant_Human_Mammary_Epithelial_Cells_(vHMEC),Foreskin_Fibroblast_Primary_Cells_skin01,Foreskin_Fibroblast_Primary_Cells_skin02,Foreskin_Keratinocyte_Primary_Cells_skin02,Foreskin_Melanocyte_Primary_Cells_skin01,H1_Derived_Mesenchymal_Stem_Cells,IMR90_fetal_lung_fibroblasts_Cell_Line,Primary_monocytes_from_peripheral_blood,Psoas_Muscle	BLOOD,BREAST,LUNG,MUSCLE,SKIN,STROMAL_CONNECTIVE	Foreskin_Fibroblast_Primary_Cells_skin01	SKIN	Bone_Marrow_Derived_Cultured_Mesenchymal_Stem_Cells,Foreskin_Fibroblast_Primary_Cells_skin01,Foreskin_Fibroblast_Primary_Cells_skin02,HUVEC_Umbilical_Vein_Endothelial_Primary_Cells,Monocytes-CD14+_RO01746_Primary_Cells,NH-A_Astrocytes_Primary_Cells,NHLF_Lung_Fibroblast_Primary_Cells,Primary_T_helper_cells_PMA-I_stimulated	BLOOD,BRAIN,LUNG,SKIN,STRONAL_CONNECTIVE,VASCULAR	.	.	.		.	A	G	G	G	G	G/G,G/G	rs117410067	AF=0.00519169	-0.652	-0.743	-1.068	0	0	0.148	.	.	1.726	0.235255	2b	LANCL2,VOPP1
chr7	55582352	55582353	SNP	5	TFBS,eQTL,enhancer,motif_alter,promoter	POLR2A	.	MOTIFBR=DHS#HNF4_disc3#55582345#55582354#+#9#0.000000#1.000000	Nerve_Tibial	.	.	.	GM12878_Lymphoblastoid_Cells,Spleen	BLOOD,SPLEEN	Foreskin_Melanocyte_Primary_Cells_skin01,GM12878_Lymphoblastoid_Cells,Primary_B_cells_from_peripheral_blood,Sigmoid_Colon	BLOOD,GI_COLON,SKIN	.	.	.		.	G	T	T	T	T	T/T,T/T	rs139571828	AF=0.00519169	-1.107	-1.186	0.379	0	0	0.097	.	.	2.61	0.078958	.	LANCL2,VOPP1
chr7	55604464	55604465	SNP	5	TFBS,eQTL,eRNA,enhancer,promoter	BCL3,BHLHE40,CTCF,EBF1,MAX,MYC,NFATC1,PAX5,POLR2A,RUNX3	.	.	Nerve_Tibial	.	.	.	Colonic_Mucosa,Dnd41_TCell_Leukemia_Cell_Line,Duodenum_Mucosa,Foreskin_Fibroblast_Primary_Cells_skin01,GM12878_Lymphoblastoid_Cells,H1_BMP4_Derived_Trophoblast_Cultured_Cells,Primary_T_regulatory_cells_from_peripheral_blood,Rectal_Mucosa_Donor_29	BLOOD,GI_COLON,GI_DUODENUM,GI_RECTUM,SKIN,Trophoblast	Colonic_Mucosa,Dnd41_TCell_Leukemia_Cell_Line,Fetal_Thymus,Foreskin_Fibroblast_Primary_Cells_skin01,Foreskin_Keratinocyte_Primary_Cells_skin03,GM12878_Lymphoblastoid_Cells,IMR90_fetal_lung_fibroblasts_Cell_Line,Primary_B_cells_from_peripheral_blood,Primary_T_helper_memory_cells_from_peripheral_blood_1,Primary_T_regulatory_cells_from_peripheral_blood,Primary_mononuclear_cells_from_peripheral_blood…	BLOOD,GI_COLON,GI_INTESTINE,GI_RECTUM,LUNG,SKIN,SPLEEN,THYMUS	dendritic_cell,spleen	.	.		.	G	A	A	A	A	A/A,A/A	rs76306116	AF=0.00519169	0.92	0.865	0.158	0.007	0.006	0.041	.	.	6.243	0.088506	4	LANCL2,VOPP1
chr7	55606341	55606342	SNP	5	TFBS,eQTL,enhancer,openChrom,promoter	E2F4,MAFK,RAD21,STAT3	.	.	Nerve_Tibial	.	Fetal_Muscle_Leg,Foreskin_Keratinocyte_Primary_Cells_skin02,H1_Derived_Neuronal_Progenitor_Cultured_Cells	BRAIN,MUSCLE_LEG,SKIN	Duodenum_Mucosa,GM12878_Lymphoblastoid_Cells,Muscle_Satellite_Cultured_Cells,Rectal_Mucosa_Donor_29	BLOOD,GI_DUODENUM,GI_RECTUM,MUSCLE	Dnd41_TCell_Leukemia_Cell_Line,GM12878_Lymphoblastoid_Cells,HMEC_Mammary_Epithelial_Primary_Cells,HUES48_Cells,Monocytes-CD14+_RO01746_Primary_Cells,NH-A_Astrocytes_Primary_Cells,Primary_B_cells_from_peripheral_blood,Rectal_Mucosa_Donor_29,Rectal_Mucosa_Donor_31,Spleen	BLOOD,BRAIN,BREAST,ESC,GI_RECTUM,SPLEEN	.	.	.		.	G	C	C	C	C	C/C,C/C	rs139766541	AF=0.00519169	-0.555	-0.605	-1.112	0	0	0	.	.	0.463	0.50284	.	LANCL2,VOPP1
chr7	55617814	55617815	SNP	5	TFBS,eQTL,enhancer,openChrom,promoter	CTCF,ELF1,EP300,SMC3,YY1,ZNF143	.	.	Nerve_Tibial	.	Fetal_Lung,H1_Cells	ESC,LUNG	Fetal_Brain_Female,GM12878_Lymphoblastoid_Cells,Primary_B_cells_from_peripheral_blood,Rectal_Mucosa_Donor_29,Rectal_Smooth_Muscle,Skeletal_Muscle_Male	BLOOD,BRAIN,GI_RECTUM,MUSCLE	Brain_Inferior_Temporal_Lobe,Colonic_Mucosa,Dnd41_TCell_Leukemia_Cell_Line,Fetal_Adrenal_Gland,Fetal_Muscle_Leg,Fetal_Muscle_Trunk,Fetal_Thymus,GM12878_Lymphoblastoid_Cells,Gastric,Pancreas,Pancreatic_Islets,Placenta_Amnion,Primary_B_cells_from_peripheral_blood,Primary_Natural_Killer_cells_from_peripheral_blood,Psoas_Muscle,Rectal_Mucosa_Donor_29,Rectal_Mucosa_Donor_31,Sigmoid_Colon,Skeletal_Musc…	ADRENAL,BLOOD,BRAIN,ENDODERM,GI_COLON,GI_INTESTINE,GI_RECTUM,GI_STOMACH,MUSCLE,MUSCLE_LEG,PANCREAS,PLACENTA,SPLEEN,THYMUS	.	.	.		.	A	G	G	G	G	G/G,G/G	rs148984201	AF=0.00519169	-0.403	-0.439	0.462	0	0	0.005	.	.	2.124	0.108992	.	LANCL2,VOPP1
chr7	73112861	73112862	SNC	5	DE_gene,TFBS,enhancer,openChrom,promoter	POLR2A,ZBTB33	.	.	.	.	Foreskin_Fibroblast_Primary_Cells_skin01,Foreskin_Fibroblast_Primary_Cells_skin02	SKIN	Foreskin_Fibroblast_Primary_Cells_skin02	SKIN	Brain_Cingulate_Gyrus,Foreskin_Fibroblast_Primary_Cells_skin01,hESC_Derived_CD56+_Mesoderm_Cultured_Cells,iPS_DF_19.11_Cells	BRAIN,ENDODERM,SKIN,iPSC	.	.	STX1A	cerebellum	.	T	C	C	C	C	C/C,C/C	.	0	-2.448	-2.519	-1.532	0	0	0	.	.	0.118	0.069865	.	STX1A,WBSCR22
chr7	73130518	73130519	SNC	5	DE_gene,TFBS,enhancer,motif_alter,promoter	E2F1,E2F4,GATA2,KAP1,MYBL2,MYC,PML,POLR2A,SIN3AK20,SMARCB1,SMARCC1,SMARCC2,TBL1XR1,ZNF274	.	MOTIFBR=DHS,GATA2,MYC#HSF_known2#73130507#73130520#-#1#0.000000#1.000000	.	.	.	.	A549_EtOH_0.02pct_Lung_Carcinoma_Cell_Line,Adipose_Derived_Mesenchymal_Stem_Cell_Cultured_Cells,Bone_Marrow_Derived_Cultured_Mesenchymal_Stem_Cells,Colon_Smooth_Muscle,Fetal_Lung,Foreskin_Fibroblast_Primary_Cells_skin01,Foreskin_Fibroblast_Primary_Cells_skin02,HeLa-S3_Cervical_Carcinoma_Cell_Line,HepG2_Hepatocellular_Carcinoma_Cell_Line,Muscle_Satellite_Cultured_Cells,NH-A_Astrocytes_Primary_Cell…	BONE,BRAIN,CERVIX,GI_COLON,GI_STOMACH,LIVER,LUNG,MUSCLE,SKIN,STRONAL_CONNECTIVE	A549_EtOH_0.02pct_Lung_Carcinoma_Cell_Line,Bone_Marrow_Derived_Cultured_Mesenchymal_Stem_Cells,Brain_Angular_Gyrus,Brain_Dorsolateral_Prefrontal_Cortex,Brain_Inferior_Temporal_Lobe,Colon_Smooth_Muscle,Fetal_Adrenal_Gland,Fetal_Intestine_Large,Fetal_Intestine_Small,Fetal_Muscle_Leg,Fetal_Muscle_Trunk,Fetal_Stomach,Foreskin_Fibroblast_Primary_Cells_skin01,Foreskin_Fibroblast_Primary_Cells_skin02,H1…	ADRENAL,BLOOD,BONE,BRAIN,CERVIX,ENDODERM,GI_COLON,GI_INTESTINE,GI_RECTUM,GI_STOMACH,LIVER,LUNG,MUSCLE,MUSCLE_LEG,PANCREAS,PLACENTA,SKIN,STROMAL_CONNECTIVE,STRONAL_CONNECTIVE,VASCULAR	.	.	STX1A	cerebellum	.	A	G	G	G	G	G/G,G/G	.	0	0.117	0.104	0.587	0	0	0.001	.	.	5.12	0.101703	.	STX1A,WBSCR22
chr7	122326658	122326659	SNC	5	NeanderDenisDesert,TFBS,enhancer,openChrom,promoter	EBF1,MAX	.	.	.	.	H1_BMP4_Derived_Mesendoderm_Cultured_Cells,H1_Cells,H9_Cells,iPS_DF_19.11_Cells,iPS_DF_6.9_Cells	ESC,Mesendoderm,iPSC	iPS-20b_Cells	iPSC	HUES48_Cells,iPS_DF_19.11_Cells	ESC,iPSC	.	NeanderDenisDesert	.		.	G	T	T	T	T	T/T,T/T	.	0	-2.082	-2.102	-2.594	0	0	0.005	.	.	0.092	0.108992	.	FEZF1,RNF133
chr8	48439012	48439013	SNP	5	TFBS,eRNA,enhancer,openChrom,promoter	EP300,TCF12	.	.	.	.	Pancreas	PANCREAS	A549_EtOH_0.02pct_Lung_Carcinoma_Cell_Line,Brain_Hippocampus_Middle,Duodenum_Mucosa,Liver,Monocytes-CD14+_RO01746_Primary_Cells,Primary_neutrophils_from_peripheral_blood	BLOOD,BRAIN,GI_DUODENUM,LIVER,LUNG	A549_EtOH_0.02pct_Lung_Carcinoma_Cell_Line,Adipose_Nuclei,Brain_Angular_Gyrus,Brain_Anterior_Caudate,Brain_Cingulate_Gyrus,Brain_Dorsolateral_Prefrontal_Cortex,Brain_Hippocampus_Middle,Brain_Inferior_Temporal_Lobe,Brain_Substantia_Nigra,Colon_Smooth_Muscle,Colonic_Mucosa,Duodenum_Smooth_Muscle,Esophagus,Fetal_Adrenal_Gland,Fetal_Intestine_Large,Fetal_Intestine_Small,Fetal_Muscle_Leg,Fetal_Muscle_…	ADRENAL,BLOOD,BRAIN,FAT,GI_COLON,GI_DUODENUM,GI_ESOPHAGUS,GI_INTESTINE,GI_RECTUM,GI_STOMACH,HEART,LIVER,LUNG,MUSCLE,MUSCLE_LEG,PANCREAS,PLACENTA,SPLEEN,STROMAL_CONNECTIVE,THYMUS	hair_follicle_cell,mesenchymal_cell,monocyte	.	.		.	C	T	T	T	T	T/T,T/T	rs16927336	AF=0.0327476	-0.06	-0.106	0.452	0	0	0.146	.	.	7.308	0.106106	3a	CEBPD
chr8	97170701	97170702	SNP	5	TFBS,enhancer,motif_alter,openChrom,promoter	CTBP2,EZH2,GATA2,POLR2A	.	MOTIFG=ZNF354C_1#97170700#97170706#+#3#6.856#2.461	.	.	Fetal_Heart,Fetal_Lung,Foreskin_Fibroblast_Primary_Cells_skin02,Primary_hematopoietic_stem_cells_G-CSF-mobilized_Female,Primary_hematopoietic_stem_cells_G-CSF-mobilized_Male	BLOOD,HEART,LUNG,SKIN	Adipose_Nuclei,Bone_Marrow_Derived_Cultured_Mesenchymal_Stem_Cells,Brain_Angular_Gyrus,Brain_Anterior_Caudate,Brain_Cingulate_Gyrus,Brain_Germinal_Matrix,Brain_Hippocampus_Middle,Brain_Inferior_Temporal_Lobe,Brain_Substantia_Nigra,Colon_Smooth_Muscle,Duodenum_Smooth_Muscle,ES-WA7_Cells,Fetal_Brain_Female,Fetal_Heart,Fetal_Intestine_Large,Fetal_Intestine_Small,Fetal_Stomach,Foreskin_Fibroblast_Pri…	BLOOD,BONE,BRAIN,ENDODERM,ESC,FAT,GI_COLON,GI_DUODENUM,GI_INTESTINE,GI_RECTUM,GI_STOMACH,HEART,MUSCLE,SKIN,STROMAL_CONNECTIVE,STRONAL_CONNECTIVE,Trophoblast,VASCULAR,iPSC	Osteoblast_Primary_Cells	BONE	.	.	.		.	T	C	C	C	C	C/C,C/C	rs187914131	AF=0.00239617	-0.386	-0.402	-0.435	0	0	0.017	.	.	6.231	0.166803	.	GDF6
chr8	130897871	130897872	SNP	5	TFBS,eRNA,enhancer,openChrom,promoter	EGR1,GATA1,NFIC	.	.	.	.	Fetal_Heart,Gastric,H1_BMP4_Derived_Mesendoderm_Cultured_Cells,Primary_Natural_Killer_cells_from_peripheral_blood,Primary_T_cells_from_peripheral_blood,Primary_hematopoietic_stem_cells_G-CSF-mobilized_Female	BLOOD,GI_STOMACH,HEART,Mesendoderm	Primary_T_helper_17_cells_PMA-I_stimulated,Primary_T_helper_cells_PMA-I_stimulated,Primary_T_helper_naive_cells_from_peripheral_blood,Primary_T_regulatory_cells_from_peripheral_blood,Primary_neutrophils_from_peripheral_blood	BLOOD	A549_EtOH_0.02pct_Lung_Carcinoma_Cell_Line,Adipose_Nuclei,Brain_Angular_Gyrus,Brain_Anterior_Caudate,Brain_Inferior_Temporal_Lobe,Colonic_Mucosa,Dnd41_TCell_Leukemia_Cell_Line,Esophagus,Fetal_Adrenal_Gland,Fetal_Intestine_Small,Fetal_Muscle_Leg,Fetal_Stomach,Foreskin_Fibroblast_Primary_Cells_skin01,Foreskin_Keratinocyte_Primary_Cells_skin03,GM12878_Lymphoblastoid_Cells,H1_BMP4_Derived_Mesendoderm…	ADRENAL,BLOOD,BONE,BRAIN,BREAST,CERVIX,ENDODERM,FAT,GI_COLON,GI_ESOPHAGUS,GI_INTESTINE,GI_STOMACH,HEART,LIVER,LUNG,MUSCLE,MUSCLE_LEG,Mesendoderm,SKIN,SPLEEN,THYMUS,VASCULAR	T_cell,natural_killer_cell	.	.		.	T	C	C	C	C	C/C,C/C	rs7812685	AF=0.066893	-1.117	-1.154	-0.898	0	0	0.001	.	.	0.267	0.093781	4	ASAP1,GSDMC
chr8	130952259	130952260	SNP	5	TFBS,TFBS_motif,enhancer,motif_alter,promoter	BCL3,CBX3,CCNT2,CHD2,E2F1,E2F4,ELF1,ELK1,ELK4,GABPA,IRF1,KDM5B,MAX,MAZ,MTA3,MXI1,MYC,NFYB,NR2F2,NRF1,PML,POLR2A,RCOR1,SIN3A,SMARCB1,SMARCC2,SP1,SP4,STAT1,STAT3,TCF7L2,THAP1,USF1,ZBTB7A,ZEB1	E2F4	MOTIFBR=EGR1,ELK4,ETS1,IRF1,MYC,NRF1,SIN3A,SP1,STAT1,USF1,ZBTB7A,ZEB1#PAX5_known4#130952259#130952279#+#2#0.000000#0.333333	.	.	.	.	A549_EtOH_0.02pct_Lung_Carcinoma_Cell_Line,Adipose_Derived_Mesenchymal_Stem_Cell_Cultured_Cells,Adipose_Nuclei,Aorta,Bone_Marrow_Derived_Cultured_Mesenchymal_Stem_Cells,Brain_Angular_Gyrus,Brain_Anterior_Caudate,Brain_Cingulate_Gyrus,Brain_Dorsolateral_Prefrontal_Cortex,Brain_Germinal_Matrix,Brain_Hippocampus_Middle,Brain_Inferior_Temporal_Lobe,Brain_Substantia_Nigra,Breast_Myoepithelial_Primary_…	ADRENAL,BLOOD,BONE,BRAIN,BREAST,CERVIX,ENDODERM,ESC,FAT,GI_COLON,GI_DUODENUM,GI_ESOPHAGUS,GI_INTESTINE,GI_RECTUM,GI_STOMACH,HEART,KIDNEY,LIVER,LUNG,MUSCLE,MUSCLE_LEG,OVARY,PANCREAS,PLACENTA,SKIN,SPLEEN,STROMAL_CONNECTIVE,STRONAL_CONNECTIVE,THYMUS,Trophoblast,VASCULAR,iPSC	A549_EtOH_0.02pct_Lung_Carcinoma_Cell_Line,Adipose_Nuclei,Bone_Marrow_Derived_Cultured_Mesenchymal_Stem_Cells,Brain_Angular_Gyrus,Brain_Anterior_Caudate,Brain_Cingulate_Gyrus,Brain_Dorsolateral_Prefrontal_Cortex,Brain_Hippocampus_Middle,Brain_Inferior_Temporal_Lobe,Brain_Substantia_Nigra,Colon_Smooth_Muscle,Colonic_Mucosa,Duodenum_Smooth_Muscle,Esophagus,Fetal_Adrenal_Gland,Fetal_Intestine_Large,…	ADRENAL,BLOOD,BONE,BRAIN,BREAST,CERVIX,ENDODERM,FAT,GI_COLON,GI_DUODENUM,GI_ESOPHAGUS,GI_INTESTINE,GI_RECTUM,GI_STOMACH,HEART,LIVER,LUNG,MUSCLE,MUSCLE_LEG,PANCREAS,SKIN,SPLEEN,STRONAL_CONNECTIVE,THYMUS,VASCULAR	.	.	.		.	A	T	T	T	T	T/T,T/T	rs186107952	AF=0.00479233	-0.395	-0.769	-2.503	0	0	0	.	.	1.842	0.046548	.	ASAP1,GSDMC
chr8	130965898	130965899	SNP	5	TFBS,TFBS_motif,enhancer,openChrom,promoter	E2F1,GATA2	E2F1	.	.	.	Fetal_Muscle_Leg,Fetal_Muscle_Trunk,Gastric,Psoas_Muscle	GI_STOMACH,MUSCLE,MUSCLE_LEG	Brain_Angular_Gyrus	BRAIN	Adipose_Nuclei,Brain_Angular_Gyrus,Brain_Anterior_Caudate,Brain_Cingulate_Gyrus,Brain_Dorsolateral_Prefrontal_Cortex,Brain_Hippocampus_Middle,Brain_Inferior_Temporal_Lobe,Brain_Substantia_Nigra,Fetal_Adrenal_Gland,Lung,Monocytes-CD14+_RO01746_Primary_Cells,Spleen	ADRENAL,BLOOD,BRAIN,FAT,LUNG,SPLEEN	.	.	.		.	G	A	A	A	A	A/A,A/A	rs184968688	AF=0.00479233	1.951	1.876	0.45	0.002	0.002	0.011	.	.	6.459	0.062308	.	ASAP1,GSDMC
chr1	9828101	9828102	SNP	4	DE_gene,TFBS,enhancer,promoter	JUNB,ZNF143	.	.	.	.	.	.	Gastric	GI_STOMACH	A549_EtOH_0.02pct_Lung_Carcinoma_Cell_Line,Foreskin_Keratinocyte_Primary_Cells_skin03,Foreskin_Melanocyte_Primary_Cells_skin03,HMEC_Mammary_Epithelial_Primary_Cells,Mesenchymal_Stem_Cell_Derived_Chondrocyte_Cultured_Cells,NH-A_Astrocytes_Primary_Cells,NHEK-Epidermal_Keratinocyte_Primary_Cells,Osteoblast_Primary_Cells,Rectal_Mucosa_Donor_31,Sigmoid_Colon,Small_Intestine	BONE,BRAIN,BREAST,GI_COLON,GI_INTESTINE,GI_RECTUM,LUNG,SKIN,STROMAL_CONNECTIVE	.	.	CLSTN1	cerebellum	.	T	C	C	C	C	C/C,C/C	rs75578880	AF=0.0135783	-1.04	-1.191	0.519	0	0	0.003	.	.	1.722	0.106106	2b	CLSTN1,PIK3CD
chr1	9852242	9852243	SNP	4	DE_gene,TFBS,enhancer,promoter	CTCF,KAP1,SMC3	.	.	.	.	.	.	Skeletal_Muscle_Female,Skeletal_Muscle_Male	MUSCLE	Dnd41_TCell_Leukemia_Cell_Line,Fetal_Adrenal_Gland,Fetal_Muscle_Trunk,Skeletal_Muscle_Female	ADRENAL,BLOOD,MUSCLE	.	.	CLSTN1	cerebellum	.	A	G	G	G	G	G/G,G/G	rs114754158	AF=0.0145767	0.17	0.164	0.167	0.005	0.004	0.004	.	.	2.207	0.116174	4	CLSTN1,PIK3CD
chr1	9854115	9854116	SNP	4	DE_gene,TFBS,enhancer,motif_alter	SPI1	.	MOTIFBR=DHS#LBX2_1#9854100#9854117#+#17#0.143001#0.263441,DHS#LHX2_1#9854100#9854117#+#17#0.226363#0.261894,DHS#LHX4_1#9854100#9854117#+#17#0.150155#0.545619	.	.	.	.	.	.	Fetal_Adrenal_Gland,H1_BMP4_Derived_Mesendoderm_Cultured_Cells,Skeletal_Muscle_Female	ADRENAL,MUSCLE,Mesendoderm	.	.	CLSTN1	cerebellum	.	G	T	T	T	T	T/T,T/T	rs150819309	AF=0.00898562	0.157	0.13	-0.823	0	0	0.001	.	.	0.813	0.078448	.	CLSTN1,PIK3CD
chr1	14010854	14010855	SNP	4	TFBS,enhancer,openChrom,promoter	FOS,MYC,STAT3	.	.	.	.	Breast_variant_Human_Mammary_Epithelial_Cells_(vHMEC),Foreskin_Keratinocyte_Primary_Cells_skin02	BREAST,SKIN	Foreskin_Keratinocyte_Primary_Cells_skin03	SKIN	Foreskin_Keratinocyte_Primary_Cells_skin03,NHEK-Epidermal_Keratinocyte_Primary_Cells	SKIN	.	.	.		.	T	C	C	C	C	C/C,C/C	rs80009382	AF=0.0407348	-0.058	-0.057	-0.142	0	0	0.002	.	.	0.629	0.053691	4	PDPN,PRDM2
chr1	14057477	14057478	SNP	4	TFBS,enhancer,openChrom,promoter	ATF2,BATF,BCL11A,BCLAF1,BHLHE40,CHD2,CTCF,E2F6,EBF1,ELF1,ELK1,EP300,FOXM1,GABPA,IRF4,MAX,MEF2A,MEF2C,MTA3,MXI1,MYC,NFIC,NFYB,PAX5,PML,POLR2A,POU2F2,RAD21,RELA,RUNX3,SIN3A,SMC3,SPI1,SRF,STAT3,TAF1,TBL1XR1,TBP,USF1,USF2,WRNIP1,YY1,ZNF263	.	.	.	.	Primary_Natural_Killer_cells_from_peripheral_blood,Primary_T_cells_from_cord_blood	BLOOD	Adipose_Nuclei,Brain_Anterior_Caudate,Brain_Hippocampus_Middle,Brain_Substantia_Nigra,Colonic_Mucosa,Dnd41_TCell_Leukemia_Cell_Line,Duodenum_Mucosa,Duodenum_Smooth_Muscle,Fetal_Intestine_Small,Fetal_Thymus,Foreskin_Keratinocyte_Primary_Cells_skin02,Monocytes-CD14+_RO01746_Primary_Cells,Primary_Natural_Killer_cells_from_peripheral_blood,Primary_T_CD8+_memory_cells_from_peripheral_blood,Primary_T_c…	BLOOD,BRAIN,FAT,GI_COLON,GI_DUODENUM,GI_INTESTINE,GI_RECTUM,MUSCLE,SKIN,SPLEEN,THYMUS	Brain_Hippocampus_Middle,Brain_Substantia_Nigra,Dnd41_TCell_Leukemia_Cell_Line,Duodenum_Smooth_Muscle,Fetal_Thymus,Foreskin_Keratinocyte_Primary_Cells_skin03,GM12878_Lymphoblastoid_Cells,H1_Derived_Mesenchymal_Stem_Cells,Monocytes-CD14+_RO01746_Primary_Cells,NHEK-Epidermal_Keratinocyte_Primary_Cells,Primary_B_cells_from_peripheral_blood,Primary_Natural_Killer_cells_from_peripheral_blood,Primary_T…	BLOOD,BRAIN,GI_COLON,GI_DUODENUM,GI_INTESTINE,GI_RECTUM,SKIN,SPLEEN,STROMAL_CONNECTIVE,THYMUS	.	.	.		.	C	T	T	T	T	T/T,T/T	rs146545513	AF=0.038738	2.176	2.331	0.53	0.351	0.123	0.039	463.3	5.15473e-86	6.224	0.08998	.	KIAA1026,PRDM2
chr1	14085720	14085721	SNP	4	TFBS,enhancer,openChrom,promoter	CTCF,EP300,ESR1,FOXA1,GATA3,POLR2A,TCF7L2	.	.	.	.	Breast_variant_Human_Mammary_Epithelial_Cells_(vHMEC),Fetal_Intestine_Small,Fetal_Kidney,Fetal_Lung,Fetal_Stomach,Foreskin_Keratinocyte_Primary_Cells_skin02,Gastric,H1_BMP4_Derived_Trophoblast_Cultured_Cells,H1_Cells,Ovary,Pancreas,Placenta,Primary_T_cells_from_cord_blood,Primary_T_cells_from_peripheral_blood,Primary_hematopoietic_stem_cells_G-CSF-mobilized_Female,Primary_hematopoietic_stem_cells…	BLOOD,BREAST,ESC,GI_INTESTINE,GI_STOMACH,KIDNEY,LUNG,OVARY,PANCREAS,PLACENTA,SKIN,Trophoblast	Brain_Dorsolateral_Prefrontal_Cortex,Brain_Substantia_Nigra,Foreskin_Keratinocyte_Primary_Cells_skin03,HUES48_Cells	BRAIN,ESC,SKIN	Esophagus,Gastric,HMEC_Mammary_Epithelial_Primary_Cells,HUES48_Cells,NHEK-Epidermal_Keratinocyte_Primary_Cells,Primary_T_cells_from_peripheral_blood,hESC_Derived_CD56+_Mesoderm_Cultured_Cells	BLOOD,BREAST,ENDODERM,ESC,GI_ESOPHAGUS,GI_STOMACH,SKIN	.	.	.		.	A	T	T	T	T	T/T,T/T	rs76085446	AF=0.0391374	0.505	1.058	0.53	0.078	0.614	0.131	377.1	1.98682e-66	3.677	0.073086	4	KIAA1026,PRDM2
chr1	14087474	14087475	SNP	4	TFBS,enhancer,openChrom,promoter	CEBPB,CTCF	.	.	.	.	H1_Derived_Neuronal_Progenitor_Cultured_Cells	BRAIN	HUES48_Cells,Liver,NHEK-Epidermal_Keratinocyte_Primary_Cells	ESC,LIVER,SKIN	Brain_Angular_Gyrus,Brain_Dorsolateral_Prefrontal_Cortex,Brain_Hippocampus_Middle,Brain_Inferior_Temporal_Lobe,Liver,Monocytes-CD14+_RO01746_Primary_Cells,Primary_T_regulatory_cells_from_peripheral_blood	BLOOD,BRAIN,LIVER	.	.	.		.	G	C	C	C	C	C/C,C/C	rs78354946	AF=0.0391374	0.063	0.069	0.651	0.006	0.005	0.004	.	.	1.502	0.119485	4	KIAA1026,PRDM2
chr1	26359221	26359222	SNP	4	DE_gene,TFBS,enhancer,motif_alter	E2F6,MAX	.	MOTIFBR=DHS,E2F6#RXRA_disc4#26359218#26359228#-#6#0.000000#0.181818,DHS,E2F6#EP300_disc5#26359219#26359234#+#4#0.041667#0.236111	.	.	.	.	.	.	Brain_Dorsolateral_Prefrontal_Cortex,Placenta	BRAIN,PLACENTA	.	.	SLC30A2	kidney	.	A	T	T	T	T	T/T,T/T	rs1343830	AF=0.0928514	-0.439	-0.52	0.375	0	0	0.004	.	.	2.156	0.095506	5	EXTL1,SLC30A2
chr1	26371023	26371024	SNP	4	DE_gene,TFBS,enhancer,promoter	CBX3,RCOR1	.	.	.	.	.	.	Gastric,Pancreas,Placenta	GI_STOMACH,PANCREAS,PLACENTA	Placenta	PLACENTA	.	.	SLC30A2	kidney	.	G	A	A	A	A	A/A,A/A	rs553283647	AF=0.000199681	0.687	0.788	0.455	0.001	0	0.084	.	.	7.081	0.095506	.	EXTL1,SLC30A2
chr1	26371186	26371187	SNP	4	DE_gene,TFBS,enhancer,promoter	CBX3,RCOR1	.	.	.	.	.	.	Fetal_Intestine_Small,Pancreas	GI_INTESTINE,PANCREAS	Pancreas	PANCREAS	.	.	SLC30A2	kidney	.	C	T	T	T	T	T/T,T/T	rs532677679	AF=0.000199681	-0.232	-0.278	-0.255	0	0	0.001	.	.	3.893	0.095506	.	EXTL1,SLC30A2
chr1	26376298	26376299	SNC	4	DE_gene,TFBS,enhancer,motif_alter	E2F6,JUND	.	MOTIFBR=DHS#ZNF423_2#26376288#26376303#+#12#0.484848#0.515152,DHS#TCF3_4#26376294#26376308#-#9#0.076923#0.615385	.	.	.	.	.	.	Fetal_Intestine_Large,Fetal_Intestine_Small,Foreskin_Fibroblast_Primary_Cells_skin01,Foreskin_Melanocyte_Primary_Cells_skin01,Foreskin_Melanocyte_Primary_Cells_skin03,H1_BMP4_Derived_Trophoblast_Cultured_Cells,Left_Ventricle,Placenta,Psoas_Muscle,Rectal_Mucosa_Donor_29,Rectal_Mucosa_Donor_31,Right_Atrium,Right_Ventricle,Sigmoid_Colon,Skeletal_Muscle_Female,Small_Intestine	GI_COLON,GI_INTESTINE,GI_RECTUM,HEART,MUSCLE,PLACENTA,SKIN,Trophoblast	.	.	SLC30A2	kidney	.	G	T	T	T	T	T/T,T/T	.	0	-0.426	-0.467	-0.498	0	0	0	.	.	0.299	0.056701	.	SLC30A2
chr1	26376994	26376995	SNC	4	DE_gene,TFBS,enhancer,openChrom	GATA3	.	.	.	.	H1_BMP4_Derived_Trophoblast_Cultured_Cells,Placenta	PLACENTA,Trophoblast	.	.	Fetal_Intestine_Large,Fetal_Intestine_Small,Foreskin_Melanocyte_Primary_Cells_skin01,Left_Ventricle,Placenta,Right_Ventricle,Skeletal_Muscle_Female	GI_INTESTINE,HEART,MUSCLE,PLACENTA,SKIN	.	.	SLC30A2	kidney	.	C	T	T	T	T	T/T,T/T	.	0	0.385	0.365	0.354	0.001	0.001	0.001	.	.	3.332	0.06567	.	SLC30A2
chr1	34224408	34224409	SNP	4	TFBS,enhancer,openChrom,promoter	MYC,NR3C1,STAT3	.	.	.	.	Fetal_Brain_Male,Fetal_Muscle_Leg,Fetal_Muscle_Trunk,Foreskin_Fibroblast_Primary_Cells_skin01,Foreskin_Fibroblast_Primary_Cells_skin02,Gastric,Psoas_Muscle,Small_Intestine	BRAIN,GI_INTESTINE,GI_STOMACH,MUSCLE,MUSCLE_LEG,SKIN	Adipose_Derived_Mesenchymal_Stem_Cell_Cultured_Cells	STRONAL_CONNECTIVE	iPS_DF_6.9_Cells	iPSC	.	.	.		.	A	T	T	T	T	T/T,T/T	rs75044869	AF=0.014976	0.192	0.143	0.455	0.002	0.002	0.225	.	.	6.105	0.061011	4	HMGB4,ZSCAN20
chr1	37828098	37828099	SNP	4	TFBS,enhancer,openChrom,promoter	REST	.	.	.	.	H1_Derived_Neuronal_Progenitor_Cultured_Cells	BRAIN	Spleen	SPLEEN	hESC_Derived_CD56+_Ectoderm_Cultured_Cells	ENDODERM	.	.	.		.	T	C	C	NA	C	C/C,C/C	rs114826176	AF=0.0223642	-1.178	-1.261	-0.388	0	0	0.004	.	.	0.75	0.074388	5	GRIK3,ZC3H12A
chr1	38464667	38464668	SNP	4	DE_gene,TFBS,enhancer,promoter	PML,POLR2A	.	.	.	.	.	.	Brain_Hippocampus_Middle,Breast_Myoepithelial_Primary_Cells,Colon_Smooth_Muscle,Colonic_Mucosa,Foreskin_Fibroblast_Primary_Cells_skin01,Foreskin_Fibroblast_Primary_Cells_skin02,HUVEC_Umbilical_Vein_Endothelial_Primary_Cells,HeLa-S3_Cervical_Carcinoma_Cell_Line,HepG2_Hepatocellular_Carcinoma_Cell_Line,Monocytes-CD14+_RO01746_Primary_Cells,Muscle_Satellite_Cultured_Cells,Primary_hematopoietic_stem_…	BLOOD,BRAIN,BREAST,CERVIX,ENDODERM,GI_COLON,HEART,LIVER,MUSCLE,SKIN,VASCULAR	Adipose_Nuclei,Aorta,Bone_Marrow_Derived_Cultured_Mesenchymal_Stem_Cells,Brain_Angular_Gyrus,Brain_Anterior_Caudate,Brain_Cingulate_Gyrus,Brain_Dorsolateral_Prefrontal_Cortex,Brain_Hippocampus_Middle,Brain_Inferior_Temporal_Lobe,Brain_Substantia_Nigra,Colon_Smooth_Muscle,Colonic_Mucosa,Duodenum_Smooth_Muscle,Esophagus,Fetal_Adrenal_Gland,Fetal_Intestine_Small,Fetal_Muscle_Leg,Fetal_Stomach,Foresk…	ADRENAL,BLOOD,BONE,BRAIN,CERVIX,ENDODERM,ESC,FAT,GI_COLON,GI_DUODENUM,GI_ESOPHAGUS,GI_INTESTINE,GI_RECTUM,GI_STOMACH,HEART,LIVER,LUNG,MUSCLE,MUSCLE_LEG,Mesendoderm,OVARY,PLACENTA,SKIN,SPLEEN,STROMAL_CONNECTIVE,STRONAL_CONNECTIVE,THYMUS,Trophoblast,VASCULAR,iPSC	.	.	FHL3	testis	.	A	G	G	G	G	G/G,G/G	rs143218143	AF=0.00119808	1.003	0.812	0.557	1	0.999	0.055	3073.7	1.43973e-168	0.977	0.706298	.	FHL3,SF3A3
chr1	38494902	38494903	indel	4	TFBS,enhancer,openChrom,promoter	CTCF,GATA2,MAFK,RAD21,TBP,ZBTB33,ZNF263	.	.	.	.	Fetal_Adrenal_Gland,Fetal_Heart,Fetal_Kidney,Fetal_Lung,Fetal_Stomach,Foreskin_Fibroblast_Primary_Cells_skin02,H1_BMP4_Derived_Mesendoderm_Cultured_Cells,H1_Cells,H1_Derived_Mesenchymal_Stem_Cells,H1_Derived_Neuronal_Progenitor_Cultured_Cells,H9_Cells,IMR90_fetal_lung_fibroblasts_Cell_Line,Ovary,Primary_hematopoietic_stem_cells_G-CSF-mobilized_Male,iPS_DF_19.11_Cells,iPS_DF_6.9_Cells	ADRENAL,BLOOD,BRAIN,ESC,GI_STOMACH,HEART,KIDNEY,LUNG,Mesendoderm,OVARY,SKIN,STROMAL_CONNECTIVE,iPSC	Brain_Dorsolateral_Prefrontal_Cortex,Brain_Germinal_Matrix,Brain_Hippocampus_Middle,Colon_Smooth_Muscle,Cortex_derived_primary_cultured_neurospheres,Duodenum_Smooth_Muscle,Fetal_Brain_Female,Foreskin_Fibroblast_Primary_Cells_skin01,Foreskin_Fibroblast_Primary_Cells_skin02,Ganglion_Eminence_derived_primary_cultured_neurospheres,Skeletal_Muscle_Female,Stomach_Smooth_Muscle,hESC_Derived_CD56+_Mesode…	BRAIN,ENDODERM,GI_COLON,GI_DUODENUM,GI_STOMACH,MUSCLE,SKIN	Brain_Dorsolateral_Prefrontal_Cortex,Brain_Hippocampus_Middle,Colon_Smooth_Muscle,Esophagus,Fetal_Stomach,Foreskin_Fibroblast_Primary_Cells_skin01,Foreskin_Fibroblast_Primary_Cells_skin02,Foreskin_Keratinocyte_Primary_Cells_skin03,Foreskin_Melanocyte_Primary_Cells_skin03,GM12878_Lymphoblastoid_Cells,HMEC_Mammary_Epithelial_Primary_Cells,HeLa-S3_Cervical_Carcinoma_Cell_Line,NHEK-Epidermal_Keratino…	BLOOD,BRAIN,BREAST,CERVIX,ENDODERM,GI_COLON,GI_ESOPHAGUS,GI_STOMACH,MUSCLE,SKIN,iPSC	.	.	.		.	C	CAG	CAG	CAG	CAG	CAG/CAG,CAG/CAG	rs561595251;rs532431604	AF=0.00199681,0.000599042	1.594	2.707	0.557	0.064	0.408	0.965	0	1964.3	14.69	0.158681	.	POU3F1,UTP11L
chr1	45103232	45103233	SNP	4	TFBS,enhancer,openChrom,promoter	E2F6,POLR2A	.	.	.	.	H1_Derived_Neuronal_Progenitor_Cultured_Cells	BRAIN	Foreskin_Fibroblast_Primary_Cells_skin01,Foreskin_Keratinocyte_Primary_Cells_skin02,K562_Leukemia_Cells,Rectal_Smooth_Muscle,Skeletal_Muscle_Male	BLOOD,GI_RECTUM,MUSCLE,SKIN	Brain_Cingulate_Gyrus,Brain_Hippocampus_Middle,Brain_Inferior_Temporal_Lobe,Brain_Substantia_Nigra,Colon_Smooth_Muscle,Fetal_Muscle_Trunk,Fetal_Stomach,Foreskin_Fibroblast_Primary_Cells_skin01,Foreskin_Fibroblast_Primary_Cells_skin02,Foreskin_Keratinocyte_Primary_Cells_skin03,Foreskin_Melanocyte_Primary_Cells_skin03,H1_Derived_Neuronal_Progenitor_Cultured_Cells,K562_Leukemia_Cells,NHEK-Epidermal_…	BLOOD,BRAIN,ENDODERM,GI_COLON,GI_RECTUM,GI_STOMACH,HEART,MUSCLE,OVARY,SKIN	.	.	.		.	C	A	A	A	A	A/A,A/A	rs143212040	AF=0.00559105	-0.207	-0.245	0.53	0.076	0.052	0.917	4953.5	0	10.72	0.115753	.	RNF220,TMEM53
chr1	45106135	45106136	SNP	4	TFBS,enhancer,motif_alter,promoter	CTCF	.	MOTIFBR=DHS#RFX3_1#45106116#45106139#+#21#0.266836#0.335904	.	.	.	.	Fetal_Heart,Skeletal_Muscle_Female,Skeletal_Muscle_Male	HEART,MUSCLE	Brain_Anterior_Caudate,Brain_Cingulate_Gyrus,Brain_Dorsolateral_Prefrontal_Cortex,Brain_Hippocampus_Middle,Brain_Inferior_Temporal_Lobe,Brain_Substantia_Nigra,Colon_Smooth_Muscle,Fetal_Muscle_Leg,Foreskin_Fibroblast_Primary_Cells_skin02,Right_Atrium,Skeletal_Muscle_Female,hESC_Derived_CD184+_Endoderm_Cultured_Cells	BRAIN,ENDODERM,GI_COLON,HEART,MUSCLE,MUSCLE_LEG,SKIN	.	.	.		.	T	C	C	C	C	C/C,C/C	rs117758998	AF=0.00559105	-0.07	0.027	-0.222	0.005	0.044	0.846	2679.3	0	10.62	0.160901	5	RNF220,TMEM53
chr1	46866259	46866260	SNP	4	enhancer,motif_alter,openChrom,promoter	.	.	MOTIFBR=DHS#NFKB_known8#46866258#46866269#-#9#0.000000#0.944444	.	.	Fetal_Intestine_Large,Fetal_Intestine_Small,H1_Cells,Small_Intestine	ESC,GI_INTESTINE	ES-WA7_Cells,Rectal_Mucosa_Donor_29,iPS-15b_Cells	ESC,GI_RECTUM,iPSC	Brain_Angular_Gyrus,Brain_Anterior_Caudate,Brain_Cingulate_Gyrus,Brain_Dorsolateral_Prefrontal_Cortex,Brain_Hippocampus_Middle,Brain_Inferior_Temporal_Lobe,Brain_Substantia_Nigra,Monocytes-CD14+_RO01746_Primary_Cells	BLOOD,BRAIN	.	.	.		.	G	T	T	T	T	T/T,T/T	rs114953854	AF=0.0135783	-0.38	-0.415	-0.69	0	0	0	.	.	0.552	0.116174	5	DMBX1,FAAH
chr1	46876912	46876913	SNP	4	TFBS,enhancer,openChrom,promoter	CTCF	.	.	.	.	H1_Cells	ESC	H1_BMP4_Derived_Trophoblast_Cultured_Cells	Trophoblast	Brain_Cingulate_Gyrus,Brain_Dorsolateral_Prefrontal_Cortex,Brain_Hippocampus_Middle,Brain_Inferior_Temporal_Lobe,Brain_Substantia_Nigra,Colonic_Mucosa,Fetal_Adrenal_Gland,Foreskin_Fibroblast_Primary_Cells_skin02	ADRENAL,BRAIN,GI_COLON,SKIN	.	.	.		.	G	T	T	T	T	T/T,T/T	rs77469497	AF=0.00838658	-2.393	-2.577	0.53	0	0	0.042	.	.	2.316	0	4	DMBX1,FAAH
chr1	46876982	46876983	SNP	4	TFBS,enhancer,openChrom,promoter	CTCF	.	.	.	.	H1_Cells	ESC	H1_BMP4_Derived_Trophoblast_Cultured_Cells	Trophoblast	Brain_Cingulate_Gyrus,Brain_Dorsolateral_Prefrontal_Cortex,Brain_Hippocampus_Middle,Brain_Inferior_Temporal_Lobe,Brain_Substantia_Nigra,Colonic_Mucosa,Fetal_Adrenal_Gland	ADRENAL,BRAIN,GI_COLON	.	.	.		.	T	C	C	C	C	C/C,C/C	rs78219253	AF=0.00838658	-2.063	-2.081	-0.222	0	0	0.003	.	.	1.577	0	2b	DMBX1,FAAH
chr1	46877884	46877885	SNP	4	TFBS,enhancer,openChrom,promoter	CTCF,MAZ,RAD21,SIN3A,SMC3,TCF12,YY1,ZBTB7A,ZNF143	.	.	.	.	H1_BMP4_Derived_Mesendoderm_Cultured_Cells,H1_Cells,H9_Cells,iPS_DF_19.11_Cells,iPS_DF_6.9_Cells	ESC,Mesendoderm,iPSC	H1_Derived_Neuronal_Progenitor_Cultured_Cells	BRAIN	iPS_DF_19.11_Cells	iPSC	.	.	.		.	C	G	G	G	G	G/G,G/G	rs75429705	AF=0.00858626	5.403	2.419	0.651	1	1	0.396	281.2	3.52826e-32	13.88	0.631981	2b	DMBX1,FAAH
chr1	46888227	46888228	SNP	4	TFBS,enhancer,openChrom,promoter	POLR2A	.	.	.	.	Primary_T_cells_from_peripheral_blood	BLOOD	Stomach_Mucosa	GI_STOMACH	Primary_T_CD8+_memory_cells_from_peripheral_blood,Primary_T_cells_effector/memory_enriched_from_peripheral_blood,Primary_T_cells_from_peripheral_blood,Primary_T_helper_17_cells_PMA-I_stimulated,Primary_T_helper_memory_cells_from_peripheral_blood_1,Primary_T_helper_memory_cells_from_peripheral_blood_2,Primary_T_helper_naive_cells_from_peripheral_blood	BLOOD	.	.	.		.	T	A	A	A	A	A/A,A/A	rs75768329	AF=0.00878594	0.585	0.56	0.415	0	0	0.001	.	.	4.867	0.06567	.	DMBX1,FAAH
chr1	78354832	78354833	SNC	4	TFBS,enhancer,openChrom,promoter	POLR2A,RBBP5,SIN3A,SIN3AK20,TBP	.	.	.	.	Fetal_Lung,Fetal_Muscle_Leg,Fetal_Thymus,H9_Cells,Primary_hematopoietic_stem_cells_G-CSF-mobilized_Male,Psoas_Muscle,Small_Intestine,iPS_DF_19.11_Cells	BLOOD,ESC,GI_INTESTINE,LUNG,MUSCLE,MUSCLE_LEG,THYMUS,iPSC	A549_EtOH_0.02pct_Lung_Carcinoma_Cell_Line,Adipose_Derived_Mesenchymal_Stem_Cell_Cultured_Cells,Adipose_Nuclei,Aorta,Bone_Marrow_Derived_Cultured_Mesenchymal_Stem_Cells,Brain_Angular_Gyrus,Brain_Anterior_Caudate,Brain_Cingulate_Gyrus,Brain_Dorsolateral_Prefrontal_Cortex,Brain_Germinal_Matrix,Brain_Hippocampus_Middle,Brain_Inferior_Temporal_Lobe,Brain_Substantia_Nigra,Breast_Myoepithelial_Primary_…	ADRENAL,BLOOD,BONE,BRAIN,BREAST,ENDODERM,ESC,FAT,GI_COLON,GI_DUODENUM,GI_ESOPHAGUS,GI_INTESTINE,GI_RECTUM,GI_STOMACH,HEART,KIDNEY,LIVER,LUNG,MUSCLE,MUSCLE_LEG,Mesendoderm,OVARY,PANCREAS,PLACENTA,SKIN,SPLEEN,STROMAL_CONNECTIVE,STRONAL_CONNECTIVE,THYMUS,Trophoblast,VASCULAR,iPSC	A549_EtOH_0.02pct_Lung_Carcinoma_Cell_Line,Adipose_Nuclei,Aorta,Bone_Marrow_Derived_Cultured_Mesenchymal_Stem_Cells,Brain_Anterior_Caudate,Brain_Dorsolateral_Prefrontal_Cortex,Brain_Hippocampus_Middle,Brain_Inferior_Temporal_Lobe,Colon_Smooth_Muscle,Colonic_Mucosa,Duodenum_Smooth_Muscle,Esophagus,Fetal_Adrenal_Gland,Fetal_Intestine_Large,Fetal_Intestine_Small,Fetal_Muscle_Leg,Fetal_Muscle_Trunk,F…	ADRENAL,BLOOD,BONE,BRAIN,BREAST,ENDODERM,ESC,FAT,GI_COLON,GI_DUODENUM,GI_ESOPHAGUS,GI_INTESTINE,GI_RECTUM,GI_STOMACH,HEART,LIVER,LUNG,MUSCLE,MUSCLE_LEG,Mesendoderm,OVARY,PANCREAS,PLACENTA,SKIN,SPLEEN,STROMAL_CONNECTIVE,STRONAL_CONNECTIVE,Trophoblast,VASCULAR,iPSC	.	.	.		.	A	G	G	G	G	G/G,G/G	.	0	0.215	0.209	-0.446	0	0	0.011	.	.	6.243	0.093295	.	NEXN
chr1	93915211	93915212	SNP	4	TFBS,enhancer,openChrom,promoter	CEBPB,CHD1,EZH2,HDAC1,SIN3AK20,STAT3	.	.	.	.	Fetal_Intestine_Large,Fetal_Intestine_Small,Fetal_Lung,Foreskin_Fibroblast_Primary_Cells_skin01,Foreskin_Fibroblast_Primary_Cells_skin02,Gastric,H1_Derived_Mesenchymal_Stem_Cells,IMR90_fetal_lung_fibroblasts_Cell_Line,Placenta,Small_Intestine	GI_INTESTINE,GI_STOMACH,LUNG,PLACENTA,SKIN,STROMAL_CONNECTIVE	A549_EtOH_0.02pct_Lung_Carcinoma_Cell_Line,Adipose_Derived_Mesenchymal_Stem_Cell_Cultured_Cells,Adipose_Nuclei,Aorta,Bone_Marrow_Derived_Cultured_Mesenchymal_Stem_Cells,Brain_Angular_Gyrus,Brain_Anterior_Caudate,Brain_Cingulate_Gyrus,Brain_Germinal_Matrix,Brain_Hippocampus_Middle,Brain_Inferior_Temporal_Lobe,Brain_Substantia_Nigra,Breast_Myoepithelial_Primary_Cells,Breast_variant_Human_Mammary_Ep…	ADRENAL,BLOOD,BONE,BRAIN,BREAST,CERVIX,ENDODERM,ESC,FAT,GI_COLON,GI_DUODENUM,GI_ESOPHAGUS,GI_INTESTINE,GI_RECTUM,GI_STOMACH,HEART,KIDNEY,LIVER,LUNG,MUSCLE,MUSCLE_LEG,Mesendoderm,PANCREAS,PLACENTA,SKIN,STROMAL_CONNECTIVE,STRONAL_CONNECTIVE,THYMUS,Trophoblast,VASCULAR,iPSC	A549_EtOH_0.02pct_Lung_Carcinoma_Cell_Line,Adipose_Nuclei,Brain_Anterior_Caudate,Duodenum_Smooth_Muscle,Fetal_Intestine_Large,Fetal_Intestine_Small,Gastric,H1_Cells,HUES48_Cells,HUES64_Cells,HUES6_Cells,HeLa-S3_Cervical_Carcinoma_Cell_Line,Rectal_Mucosa_Donor_29,Rectal_Mucosa_Donor_31,Sigmoid_Colon,Small_Intestine,hESC_Derived_CD184+_Endoderm_Cultured_Cells,hESC_Derived_CD56+_Mesoderm_Cultured_Ce…	BRAIN,CERVIX,ENDODERM,ESC,FAT,GI_COLON,GI_DUODENUM,GI_INTESTINE,GI_RECTUM,GI_STOMACH,LUNG,iPSC	.	.	.		.	A	T	T	T	T	T/T,T/T	rs147503578	AF=0.00299521	0.059	-0.043	0.457	0	0.002	0.938	.	.	14.97	0.07523	.	BCAR3,FNBP1L
chr1	94032968	94032969	SNP	4	TFBS,enhancer,openChrom,promoter	CBX3,CCNT2,CEBPB,GATA1,GTF2B,HDAC1,IRF1,JUN,JUND,KAP1,MAX,MXI1,PML,POLR2A,SIRT6,SMARCB1,TRIM28,YY1	.	.	.	.	Fetal_Brain_Male,Fetal_Muscle_Leg,Ovary	BRAIN,MUSCLE_LEG,OVARY	K562_Leukemia_Cells,Skeletal_Muscle_Male	BLOOD,MUSCLE	Adipose_Nuclei,Bone_Marrow_Derived_Cultured_Mesenchymal_Stem_Cells,Brain_Anterior_Caudate,Duodenum_Smooth_Muscle,Esophagus,Fetal_Adrenal_Gland,Fetal_Intestine_Large,Fetal_Intestine_Small,Fetal_Stomach,Fetal_Thymus,Foreskin_Fibroblast_Primary_Cells_skin01,Foreskin_Fibroblast_Primary_Cells_skin02,H1_BMP4_Derived_Mesendoderm_Cultured_Cells,H1_BMP4_Derived_Trophoblast_Cultured_Cells,H1_Derived_Mesenc…	ADRENAL,BLOOD,BONE,BRAIN,ENDODERM,ESC,FAT,GI_DUODENUM,GI_ESOPHAGUS,GI_INTESTINE,GI_RECTUM,GI_STOMACH,HEART,LUNG,MUSCLE,Mesendoderm,SKIN,STROMAL_CONNECTIVE,STRONAL_CONNECTIVE,THYMUS,Trophoblast,VASCULAR	.	.	.		.	C	G	G	G	G	G/G,G/G	rs34294233	AF=0.00459265	1.747	1.464	-0.17	0.999	1	0.935	645.7	1.11083e-104	11.2	0.730579	2b	BCAR3,FNBP1L
chr1	97463544	97463545	SNP	4	DE_gene,haDHS,openChrom,promoter	.	.	.	.	haDHS	Fetal_Heart,H1_BMP4_Derived_Trophoblast_Cultured_Cells	HEART,Trophoblast	Fetal_Lung,Primary_hematopoietic_stem_cells_G-CSF-mobilized_Male	BLOOD,LUNG	.	.	.	.	DPYD	cerebellum	.	T	G	G	G	G	G/G,G/G	rs572404572	AF=0.000199681	1.597	2.566	0.587	0.991	0.987	0.027	1819.2	6.52485e-101	9.124	0.053691	.	DPYD,PTBP2
chr1	104103182	104103183	SNC	4	NeanderDenisDesert,TFBS,enhancer,promoter	ARID3A	.	.	.	.	.	.	Liver	LIVER	Liver	LIVER	.	NeanderDenisDesert	.		.	T	C	C	C	C	C/C,C/C	.	0	-0.289	-0.314	-0.307	0.035	0.016	0.014	.	.	0.416	0.078448	.	AMY2A,AMY2B
chr1	113453388	113453389	SNC	4	NeanderDenisDesert,TFBS,enhancer,promoter	PML,POLR2A	.	.	.	.	.	.	iPS-18_Cells	iPSC	Brain_Cingulate_Gyrus,H1_BMP4_Derived_Mesendoderm_Cultured_Cells,HUES64_Cells,iPS-18_Cells,iPS_DF_19.11_Cells,iPS_DF_6.9_Cells	BRAIN,ESC,Mesendoderm,iPSC	.	NeanderDenisDesert	.		.	G	A	A	A	A	A/A,A/A	.	0	-1.562	-1.651	-0.47	0	0	0	.	.	0.843	0.106106	.	FAM19A3,SLC16A1
chr1	113453518	113453519	SNC	4	NeanderDenisDesert,TFBS,enhancer,openChrom	PML,POLR2A	.	.	.	.	H9_Cells	ESC	.	.	Brain_Cingulate_Gyrus,H1_BMP4_Derived_Mesendoderm_Cultured_Cells,H1_Cells,HUES48_Cells,HUES64_Cells,HUES6_Cells,iPS-18_Cells,iPS_DF_19.11_Cells	BRAIN,ESC,Mesendoderm,iPSC	.	NeanderDenisDesert	.		.	T	A	A	A	A	A/A,A/A	.	0	-0.224	-0.227	-0.306	0.018	0.014	0.002	.	.	3.786	0.099367	.	FAM19A3,SLC16A1
chr1	113467736	113467737	SNC	4	NeanderDenisDesert,TFBS,enhancer,motif_alter	CTCF	.	MOTIFBR=CTCF,DHS#MAF_known5#113467722#113467737#-#0#0.185674#0.424835,CTCF,DHS#TEAD1_4#113467726#113467743#-#6#0.016216#0.051351	.	.	.	.	.	.	Brain_Cingulate_Gyrus,iPS-20b_Cells	BRAIN,iPSC	.	NeanderDenisDesert	.		.	A	T	T	T	T	T/T,T/T	.	0	1.256	1.172	0.363	0.019	0.011	0.065	.	.	3.412	0.099367	.	FAM19A3,SLC16A1
chr1	113471025	113471026	SNC	4	NeanderDenisDesert,enhancer,openChrom,promoter	.	.	.	.	.	Fetal_Heart	HEART	Brain_Substantia_Nigra	BRAIN	Brain_Angular_Gyrus,Brain_Anterior_Caudate,Brain_Cingulate_Gyrus,Brain_Dorsolateral_Prefrontal_Cortex,Brain_Hippocampus_Middle,Brain_Inferior_Temporal_Lobe,Brain_Substantia_Nigra,Foreskin_Fibroblast_Primary_Cells_skin01,Mesenchymal_Stem_Cell_Derived_Chondrocyte_Cultured_Cells	BRAIN,SKIN,STROMAL_CONNECTIVE	.	NeanderDenisDesert	.		.	C	A	A	A	A	A/A,A/A	.	0	-0.045	0.109	0.393	0	0	0.018	.	.	6.784	0.099367	.	FAM19A3,SLC16A1
chr1	113478772	113478773	SNC	4	NeanderDenisDesert,TFBS,enhancer,promoter	ATF1,CCNT2,CEBPB,GATA2,GTF3C2,IRF1,JUN,JUND,KAP1,MAX,MYC,NFYA,POLR2A,RCOR1,STAT1,STAT3,TBP,TEAD4,TRIM28	.	.	.	.	.	.	Foreskin_Keratinocyte_Primary_Cells_skin03,Mesenchymal_Stem_Cell_Derived_Chondrocyte_Cultured_Cells	SKIN,STROMAL_CONNECTIVE	A549_EtOH_0.02pct_Lung_Carcinoma_Cell_Line,Bone_Marrow_Derived_Cultured_Mesenchymal_Stem_Cells,Foreskin_Keratinocyte_Primary_Cells_skin03,H1_Derived_Mesenchymal_Stem_Cells,HMEC_Mammary_Epithelial_Primary_Cells,HUES48_Cells,HUVEC_Umbilical_Vein_Endothelial_Primary_Cells,HeLa-S3_Cervical_Carcinoma_Cell_Line,Mesenchymal_Stem_Cell_Derived_Chondrocyte_Cultured_Cells,NH-A_Astrocytes_Primary_Cells,NHEK-…	BLOOD,BONE,BRAIN,BREAST,CERVIX,ENDODERM,ESC,LUNG,SKIN,STROMAL_CONNECTIVE,STRONAL_CONNECTIVE,VASCULAR	.	NeanderDenisDesert	.		.	C	G	G	G	G	G/G,G/G	.	0	0.532	0.529	0.299	0.004	0.003	0.004	.	.	1.024	0.073086	.	FAM19A3,SLC16A1
chr1	113497756	113497757	SNC	4	NeanderDenisDesert,TFBS,enhancer,promoter	CHD1,CHD2,CTBP2,EP300,IRF3,POLR2A,SIN3A	.	.	.	.	.	.	A549_EtOH_0.02pct_Lung_Carcinoma_Cell_Line,Adipose_Derived_Mesenchymal_Stem_Cell_Cultured_Cells,Adipose_Nuclei,Aorta,Bone_Marrow_Derived_Cultured_Mesenchymal_Stem_Cells,Brain_Angular_Gyrus,Brain_Anterior_Caudate,Brain_Cingulate_Gyrus,Brain_Dorsolateral_Prefrontal_Cortex,Brain_Germinal_Matrix,Brain_Hippocampus_Middle,Brain_Inferior_Temporal_Lobe,Brain_Substantia_Nigra,Breast_Myoepithelial_Primary_…	ADRENAL,BLOOD,BONE,BRAIN,BREAST,CERVIX,ENDODERM,ESC,FAT,GI_COLON,GI_DUODENUM,GI_INTESTINE,GI_RECTUM,GI_STOMACH,HEART,KIDNEY,LIVER,LUNG,MUSCLE,MUSCLE_LEG,Mesendoderm,OVARY,PLACENTA,SKIN,STROMAL_CONNECTIVE,STRONAL_CONNECTIVE,THYMUS,VASCULAR,iPSC	A549_EtOH_0.02pct_Lung_Carcinoma_Cell_Line,Adipose_Nuclei,Bone_Marrow_Derived_Cultured_Mesenchymal_Stem_Cells,Brain_Anterior_Caudate,Brain_Cingulate_Gyrus,Brain_Hippocampus_Middle,Brain_Inferior_Temporal_Lobe,Brain_Substantia_Nigra,Colon_Smooth_Muscle,Dnd41_TCell_Leukemia_Cell_Line,Duodenum_Smooth_Muscle,Fetal_Adrenal_Gland,Fetal_Intestine_Small,Fetal_Muscle_Leg,Fetal_Muscle_Trunk,Foreskin_Fibrob…	ADRENAL,BLOOD,BONE,BRAIN,BREAST,CERVIX,ENDODERM,ESC,FAT,GI_COLON,GI_DUODENUM,GI_INTESTINE,GI_RECTUM,GI_STOMACH,HEART,LIVER,LUNG,MUSCLE,MUSCLE_LEG,SKIN,STROMAL_CONNECTIVE,STRONAL_CONNECTIVE,VASCULAR,iPSC	.	NeanderDenisDesert	.		.	A	G	G	G	G	G/G,G/G	.	0	0.255	0.24	0.646	0	0	0.019	.	.	2.586	0.078958	.	FAM19A3,SLC16A1
chr1	113500656	113500657	SNP	4	NeanderDenisDesert,TFBS,enhancer,promoter	WRNIP1	.	.	.	.	.	.	A549_EtOH_0.02pct_Lung_Carcinoma_Cell_Line,Adipose_Derived_Mesenchymal_Stem_Cell_Cultured_Cells,Aorta,Bone_Marrow_Derived_Cultured_Mesenchymal_Stem_Cells,Brain_Angular_Gyrus,Brain_Anterior_Caudate,Brain_Cingulate_Gyrus,Brain_Dorsolateral_Prefrontal_Cortex,Brain_Germinal_Matrix,Brain_Hippocampus_Middle,Brain_Inferior_Temporal_Lobe,Breast_Myoepithelial_Primary_Cells,Breast_variant_Human_Mammary_Epi…	ADRENAL,BLOOD,BONE,BRAIN,BREAST,CERVIX,ENDODERM,ESC,FAT,GI_COLON,GI_DUODENUM,GI_INTESTINE,GI_RECTUM,GI_STOMACH,HEART,KIDNEY,LIVER,LUNG,MUSCLE,Mesendoderm,OVARY,SKIN,STROMAL_CONNECTIVE,STRONAL_CONNECTIVE,THYMUS,VASCULAR,iPSC	A549_EtOH_0.02pct_Lung_Carcinoma_Cell_Line,Adipose_Nuclei,Aorta,Bone_Marrow_Derived_Cultured_Mesenchymal_Stem_Cells,Brain_Anterior_Caudate,Brain_Dorsolateral_Prefrontal_Cortex,Brain_Hippocampus_Middle,Brain_Inferior_Temporal_Lobe,Colon_Smooth_Muscle,Colonic_Mucosa,Dnd41_TCell_Leukemia_Cell_Line,Duodenum_Smooth_Muscle,Fetal_Adrenal_Gland,Fetal_Intestine_Large,Fetal_Intestine_Small,Fetal_Thymus,For…	ADRENAL,BLOOD,BONE,BRAIN,BREAST,CERVIX,ENDODERM,ESC,FAT,GI_COLON,GI_DUODENUM,GI_INTESTINE,GI_RECTUM,GI_STOMACH,HEART,LIVER,LUNG,MUSCLE,Mesendoderm,SKIN,SPLEEN,STROMAL_CONNECTIVE,STRONAL_CONNECTIVE,THYMUS,VASCULAR,iPSC	.	NeanderDenisDesert	.		.	C	G	G	G	G	G/G,G/G	rs74929506	AF=0.0105831	-0.507	-0.529	-0.154	0	0	0.001	.	.	4.322	0.078958	5	SLC16A1
chr1	113500946	113500947	SNP	4	NeanderDenisDesert,enhancer,openChrom,promoter	.	.	.	.	.	Psoas_Muscle	MUSCLE	A549_EtOH_0.02pct_Lung_Carcinoma_Cell_Line,Adipose_Derived_Mesenchymal_Stem_Cell_Cultured_Cells,Bone_Marrow_Derived_Cultured_Mesenchymal_Stem_Cells,Brain_Angular_Gyrus,Brain_Anterior_Caudate,Brain_Cingulate_Gyrus,Brain_Dorsolateral_Prefrontal_Cortex,Breast_Myoepithelial_Primary_Cells,Breast_variant_Human_Mammary_Epithelial_Cells_(vHMEC),Colon_Smooth_Muscle,Cortex_derived_primary_cultured_neurosph…	BLOOD,BONE,BRAIN,BREAST,CERVIX,ENDODERM,ESC,FAT,GI_COLON,GI_DUODENUM,GI_RECTUM,GI_STOMACH,HEART,LUNG,MUSCLE,SKIN,STROMAL_CONNECTIVE,STRONAL_CONNECTIVE,VASCULAR,iPSC	Adipose_Nuclei,Brain_Anterior_Caudate,Colon_Smooth_Muscle,Dnd41_TCell_Leukemia_Cell_Line,Duodenum_Smooth_Muscle,Foreskin_Fibroblast_Primary_Cells_skin01,Foreskin_Melanocyte_Primary_Cells_skin03,GM12878_Lymphoblastoid_Cells,Gastric,Left_Ventricle,Mesenchymal_Stem_Cell_Derived_Chondrocyte_Cultured_Cells,NHEK-Epidermal_Keratinocyte_Primary_Cells,Osteoblast_Primary_Cells,Primary_T_CD8+_memory_cells_f…	BLOOD,BONE,BRAIN,FAT,GI_COLON,GI_DUODENUM,GI_INTESTINE,GI_RECTUM,GI_STOMACH,HEART,MUSCLE,SKIN,STROMAL_CONNECTIVE	.	NeanderDenisDesert	.		.	A	G	G	G	G	G/G,G/G	rs114357382	AF=0.0105831	-0.667	-0.687	-0.674	0.002	0.002	0.002	.	.	0.917	0.07321	5	SLC16A1
chr1	113526459	113526460	SNP	4	NeanderDenisDesert,TFBS,enhancer,promoter	SPI1	.	.	.	.	.	.	Fetal_Heart,Monocytes-CD14+_RO01746_Primary_Cells	BLOOD,HEART	GM12878_Lymphoblastoid_Cells,Left_Ventricle,Monocytes-CD14+_RO01746_Primary_Cells,Primary_B_cells_from_peripheral_blood,Psoas_Muscle,Right_Atrium,Skeletal_Muscle_Female	BLOOD,HEART,MUSCLE	.	NeanderDenisDesert	.		.	G	C	C	C	C	C/C,C/C	rs150481799	AF=0.00559105	0.684	0.699	0.587	0.028	0.021	0.055	.	.	4.482	0.093781	.	LRIG2,SLC16A1
chr1	113527995	113527996	SNP	4	NeanderDenisDesert,TFBS,enhancer,promoter	BATF,EP300,NFYB,RUNX3	.	.	.	.	.	.	Fetal_Heart	HEART	Skeletal_Muscle_Female	MUSCLE	.	NeanderDenisDesert	.		.	G	A	A	A	A	A/A,A/A	rs116484873	AF=0.00559105	0.06	0.022	0.53	0	0	0.003	.	.	2.52	0.126639	3a	LRIG2,SLC16A1
chr1	169830103	169830104	SNP	4	TFBS,eQTL,enhancer,openChrom	HNF4A,MYBL2,SP1	.	.	Adipose_Subcutaneous,Adipose_Visceral,Adrenal_Gland,Artery_Aorta,Artery_Coronary,Artery_Tibial,Brain_Anterior_cingulate_cortex,Brain_Caudate_basal_ganglia,Brain_Cerebellar_Hemisphere,Brain_Cerebellum,Brain_Frontal_Cortex,Brain_Hippocampus,Brain_Hypothalamus,Brain_Nucleus_accumbens_basal_ganglia,Brain_Putamen_basal_ganglia,Breast_Mammary_Tissue,Colon_Sigmoid,Colon_Transverse,Esophagus_Gastroesopha…	.	Foreskin_Melanocyte_Primary_Cells_skin01	SKIN	.	.	Mesenchymal_Stem_Cell_Derived_Chondrocyte_Cultured_Cells,Primary_T_helper_cells_PMA-I_stimulated,hESC_Derived_CD184+_Endoderm_Cultured_Cells	BLOOD,ENDODERM,STROMAL_CONNECTIVE	.	.	.		.	G	C	C	C	C	C/C,C/C	rs12136425	AF=0.0443291	-1.848	-1.893	-0.148	0	0	0.001	.	.	0.233	0.099367	1d	C1orf156,SCYL3
chr1	169861437	169861438	SNP	4	eQTL,enhancer,openChrom,promoter	.	.	.	Adipose_Subcutaneous,Adipose_Visceral,Adrenal_Gland,Artery_Aorta,Artery_Coronary,Artery_Tibial,Brain_Anterior_cingulate_cortex,Brain_Caudate_basal_ganglia,Brain_Cerebellar_Hemisphere,Brain_Cerebellum,Brain_Frontal_Cortex,Brain_Hippocampus,Brain_Putamen_basal_ganglia,Breast_Mammary_Tissue,Colon_Sigmoid,Colon_Transverse,Esophagus_Gastroesophageal_Junction,Esophagus_Mucosa,Esophagus_Muscularis,Heart…	.	Fetal_Stomach,Gastric,Primary_B_cells_from_peripheral_blood	BLOOD,GI_STOMACH	A549_EtOH_0.02pct_Lung_Carcinoma_Cell_Line,Adipose_Derived_Mesenchymal_Stem_Cell_Cultured_Cells,Adipose_Nuclei,Bone_Marrow_Derived_Cultured_Mesenchymal_Stem_Cells,Brain_Dorsolateral_Prefrontal_Cortex,Breast_variant_Human_Mammary_Epithelial_Cells_(vHMEC),Colon_Smooth_Muscle,Colonic_Mucosa,Dnd41_TCell_Leukemia_Cell_Line,Duodenum_Mucosa,Duodenum_Smooth_Muscle,Foreskin_Fibroblast_Primary_Cells_skin01…	BLOOD,BONE,BRAIN,BREAST,ENDODERM,ESC,FAT,GI_COLON,GI_DUODENUM,GI_INTESTINE,GI_RECTUM,GI_STOMACH,LIVER,LUNG,MUSCLE,SKIN,STROMAL_CONNECTIVE,STRONAL_CONNECTIVE	A549_EtOH_0.02pct_Lung_Carcinoma_Cell_Line,Adipose_Nuclei,Bone_Marrow_Derived_Cultured_Mesenchymal_Stem_Cells,Brain_Hippocampus_Middle,Colon_Smooth_Muscle,Fetal_Adrenal_Gland,Fetal_Intestine_Small,Fetal_Stomach,Foreskin_Fibroblast_Primary_Cells_skin01,GM12878_Lymphoblastoid_Cells,Gastric,H1_BMP4_Derived_Trophoblast_Cultured_Cells,Liver,Mesenchymal_Stem_Cell_Derived_Chondrocyte_Cultured_Cells,NHEK…	ADRENAL,BLOOD,BONE,BRAIN,FAT,GI_COLON,GI_INTESTINE,GI_STOMACH,LIVER,LUNG,PANCREAS,PLACENTA,SKIN,STROMAL_CONNECTIVE,STRONAL_CONNECTIVE,THYMUS,Trophoblast	.	.	.		.	C	T	T	T	T	T/T,T/T	rs74122419	AF=0.0838658	-1.004	-1.091	-0.422	0	0	0	.	.	1.729	0.093295	5	C1orf156,SCYL3
chr1	169895315	169895316	SNP	4	TFBS,eQTL,enhancer,openChrom	ATF2,GATA3	.	.	Adipose_Subcutaneous,Adipose_Visceral,Adrenal_Gland,Artery_Aorta,Artery_Coronary,Artery_Tibial,Brain_Anterior_cingulate_cortex,Brain_Caudate_basal_ganglia,Brain_Cerebellar_Hemisphere,Brain_Cerebellum,Brain_Frontal_Cortex,Brain_Hippocampus,Brain_Putamen_basal_ganglia,Breast_Mammary_Tissue,Colon_Sigmoid,Colon_Transverse,Esophagus_Gastroesophageal_Junction,Esophagus_Mucosa,Esophagus_Muscularis,Heart…	.	Fetal_Lung,Fetal_Stomach	GI_STOMACH,LUNG	.	.	H1_BMP4_Derived_Trophoblast_Cultured_Cells,Primary_T_helper_memory_cells_from_peripheral_blood_1,Primary_T_helper_memory_cells_from_peripheral_blood_2,Primary_T_regulatory_cells_from_peripheral_blood,Rectal_Mucosa_Donor_29,Rectal_Mucosa_Donor_31,hESC_Derived_CD56+_Mesoderm_Cultured_Cells	BLOOD,ENDODERM,GI_RECTUM,Trophoblast	.	.	.		.	G	A	A	A	A	A/A,A/A	rs2806390	AF=0.95647	-0.153	-0.21	0.45	0.002	0.001	0.422	.	.	.	0.093781	2b	KIFAP3,SCYL3
chr1	169903687	169903688	SNP	4	TFBS,eQTL,openChrom,promoter	EP300,MAFK,MYC,RAD21,RCOR1,RFX5,SMC3,STAT1,STAT3,TCF7L2,ZNF217	.	.	Adipose_Subcutaneous,Adipose_Visceral,Adrenal_Gland,Artery_Aorta,Artery_Coronary,Artery_Tibial,Brain_Anterior_cingulate_cortex,Brain_Caudate_basal_ganglia,Brain_Cerebellar_Hemisphere,Brain_Cerebellum,Brain_Frontal_Cortex,Brain_Hippocampus,Brain_Putamen_basal_ganglia,Breast_Mammary_Tissue,Colon_Sigmoid,Colon_Transverse,Esophagus_Gastroesophageal_Junction,Esophagus_Mucosa,Esophagus_Muscularis,Heart…	.	Breast_variant_Human_Mammary_Epithelial_Cells_(vHMEC),Fetal_Heart,Fetal_Kidney,Fetal_Stomach,Foreskin_Fibroblast_Primary_Cells_skin02,Gastric,H1_BMP4_Derived_Trophoblast_Cultured_Cells,Placenta,Small_Intestine	BREAST,GI_INTESTINE,GI_STOMACH,HEART,KIDNEY,PLACENTA,SKIN,Trophoblast	NH-A_Astrocytes_Primary_Cells	BRAIN	.	.	.	.	.		.	C	T	T	T	T	T/T,T/T	rs601355	AF=0.95607	0.953	0.887	0.249	0.005	0.004	0.767	.	.	.	0.114469	1d	KIFAP3,SCYL3
chr1	169915540	169915541	SNP	4	TFBS,TFBS_motif,eQTL,motif_alter	CEBPB,STAT3	CEBPB	MOTIFBR=CEBPB,DHS,STAT3#CEBPB_known2#169915538#169915552#+#4#0.000000#0.058824	Adipose_Subcutaneous,Adipose_Visceral,Adrenal_Gland,Artery_Aorta,Artery_Coronary,Artery_Tibial,Brain_Anterior_cingulate_cortex,Brain_Cerebellar_Hemisphere,Brain_Cerebellum,Brain_Frontal_Cortex,Brain_Hippocampus,Brain_Putamen_basal_ganglia,Breast_Mammary_Tissue,Colon_Sigmoid,Colon_Transverse,Esophagus_Gastroesophageal_Junction,Esophagus_Mucosa,Esophagus_Muscularis,Heart_Atrial_Appendage,Heart_Left…	.	.	.	.	.	.	.	.	.	.		.	C	G	G	G	G	G/G,G/G	rs686519	AF=0.932508	-0.927	-0.555	0.559	0	0	0.1	.	.	.	0.078448	1c	KIFAP3,SCYL3
chr1	169937417	169937418	SNP	4	TFBS,eQTL,enhancer,motif_alter	EP300,GATA2,GATA3	.	MOTIFBR=EP300,GATA2#HNF1B_2#169937401#169937418#-#0#0.151847#0.151885	Adipose_Subcutaneous,Adipose_Visceral,Adrenal_Gland,Artery_Aorta,Artery_Coronary,Artery_Tibial,Brain_Anterior_cingulate_cortex,Brain_Caudate_basal_ganglia,Brain_Cerebellar_Hemisphere,Brain_Cerebellum,Brain_Frontal_Cortex,Brain_Hippocampus,Brain_Putamen_basal_ganglia,Breast_Mammary_Tissue,Colon_Sigmoid,Colon_Transverse,Esophagus_Gastroesophageal_Junction,Esophagus_Mucosa,Esophagus_Muscularis,Heart…	.	.	.	.	.	HUES6_Cells,hESC_Derived_CD56+_Mesoderm_Cultured_Cells	ENDODERM,ESC	.	.	.		.	T	C	C	C	C	C/C,C/C	rs545963	AF=0.957268	0.205	-0.134	-0.466	0.977	0.687	0.898	1440.1	7.91481e-258	.	0.074636	1d	KIFAP3,SCYL3
chr1	170032253	170032254	SNP	4	TFBS,eQTL,enhancer,promoter	GATA3,ZNF217	.	.	Adipose_Subcutaneous,Adipose_Visceral,Adrenal_Gland,Artery_Aorta,Artery_Coronary,Artery_Tibial,Brain_Anterior_cingulate_cortex,Brain_Caudate_basal_ganglia,Brain_Cerebellar_Hemisphere,Brain_Cerebellum,Brain_Frontal_Cortex,Brain_Hippocampus,Brain_Putamen_basal_ganglia,Breast_Mammary_Tissue,Colon_Sigmoid,Colon_Transverse,Esophagus_Gastroesophageal_Junction,Esophagus_Mucosa,Esophagus_Muscularis,Heart…	.	.	.	Foreskin_Keratinocyte_Primary_Cells_skin03,NHEK-Epidermal_Keratinocyte_Primary_Cells	SKIN	Esophagus,Foreskin_Keratinocyte_Primary_Cells_skin03,HMEC_Mammary_Epithelial_Primary_Cells,NHEK-Epidermal_Keratinocyte_Primary_Cells,hESC_Derived_CD56+_Ectoderm_Cultured_Cells	BREAST,ENDODERM,GI_ESOPHAGUS,SKIN	.	.	.		.	C	T	T	T	C	T/T,T/T	rs12145614	AF=0.0509185	-2.428	-2.492	-2.566	0.003	0.003	0.003	.	.	0.046	0.053691	.	KIFAP3,SCYL3
chr1	170038039	170038040	SNP	4	TFBS,eQTL,enhancer,promoter	NFIC	.	.	Adipose_Subcutaneous,Adipose_Visceral,Adrenal_Gland,Artery_Aorta,Artery_Coronary,Artery_Tibial,Brain_Anterior_cingulate_cortex,Brain_Caudate_basal_ganglia,Brain_Cerebellar_Hemisphere,Brain_Cerebellum,Brain_Frontal_Cortex,Brain_Hippocampus,Brain_Putamen_basal_ganglia,Breast_Mammary_Tissue,Colon_Sigmoid,Colon_Transverse,Esophagus_Gastroesophageal_Junction,Esophagus_Mucosa,Esophagus_Muscularis,Heart…	.	.	.	Adipose_Derived_Mesenchymal_Stem_Cell_Cultured_Cells,Bone_Marrow_Derived_Cultured_Mesenchymal_Stem_Cells,Dnd41_TCell_Leukemia_Cell_Line,Foreskin_Keratinocyte_Primary_Cells_skin03,GM12878_Lymphoblastoid_Cells,Liver,Mesenchymal_Stem_Cell_Derived_Adipocyte_Cultured_Cells,Mesenchymal_Stem_Cell_Derived_Chondrocyte_Cultured_Cells,NHDF-Ad_Adult_Dermal_Fibroblast_Primary_Cells,Primary_T_regulatory_cells_…	BLOOD,FAT,GI_RECTUM,LIVER,SKIN,STROMAL_CONNECTIVE,STRONAL_CONNECTIVE	Dnd41_TCell_Leukemia_Cell_Line,Fetal_Thymus,Foreskin_Keratinocyte_Primary_Cells_skin03,GM12878_Lymphoblastoid_Cells,Liver,NHDF-Ad_Adult_Dermal_Fibroblast_Primary_Cells,NHLF_Lung_Fibroblast_Primary_Cells,Primary_Natural_Killer_cells_from_peripheral_blood,Primary_T_regulatory_cells_from_peripheral_blood,Primary_hematopoietic_stem_cells_G-CSF-mobilized_Female	BLOOD,LIVER,LUNG,SKIN,THYMUS	.	.	.		.	C	T	T	T	T	T/T,T/T	rs78222852	AF=0.0427316	0.268	0.252	0.249	0.006	0.006	0.005	.	.	2.045	0.085055	5	KIFAP3,SCYL3
chr1	170042535	170042536	SNP	4	TFBS,eQTL,enhancer,openChrom	POLR2A,TBP	.	.	Adipose_Subcutaneous,Adipose_Visceral,Adrenal_Gland,Artery_Aorta,Artery_Coronary,Artery_Tibial,Brain_Anterior_cingulate_cortex,Brain_Caudate_basal_ganglia,Brain_Cerebellar_Hemisphere,Brain_Cerebellum,Brain_Frontal_Cortex,Brain_Hippocampus,Brain_Putamen_basal_ganglia,Breast_Mammary_Tissue,Colon_Sigmoid,Colon_Transverse,Esophagus_Gastroesophageal_Junction,Esophagus_Mucosa,Esophagus_Muscularis,Heart…	.	Fetal_Muscle_Trunk	MUSCLE	.	.	Adipose_Nuclei,Duodenum_Smooth_Muscle,Primary_T_helper_naive_cells_from_peripheral_blood,Primary_T_regulatory_cells_from_peripheral_blood,Primary_hematopoietic_stem_cells_G-CSF-mobilized_Female	BLOOD,FAT,GI_DUODENUM	.	.	.		.	C	T	T	T	T	T/T,T/T	rs76993477	AF=0.0509185	0.917	0.85	0.455	0.006	0.004	0.019	.	.	5.432	0.125411	4	KIFAP3,SCYL3
chr1	191870919	191870920	SNP	4	TFBS,enhancer,openChrom,promoter	STAT3	.	.	.	.	Foreskin_Keratinocyte_Primary_Cells_skin02,Placenta,iPS_DF_19.11_Cells,iPS_DF_6.9_Cells	PLACENTA,SKIN,iPSC	Brain_Dorsolateral_Prefrontal_Cortex	BRAIN	Foreskin_Keratinocyte_Primary_Cells_skin03,HUES6_Cells,NHEK-Epidermal_Keratinocyte_Primary_Cells,iPS_DF_19.11_Cells	ESC,SKIN,iPSC	.	.	.		.	A	T	T	T	T	T/T,T/T	rs76261314	AF=0.0115815	-0.867	-0.937	-0.972	0.009	0.006	0.006	.	.	0.073	0.126639	5	RGS18
chr1	191870948	191870949	SNP	4	TFBS,enhancer,openChrom,promoter	STAT3	.	.	.	.	Foreskin_Keratinocyte_Primary_Cells_skin02,Placenta,iPS_DF_19.11_Cells,iPS_DF_6.9_Cells	PLACENTA,SKIN,iPSC	Brain_Dorsolateral_Prefrontal_Cortex	BRAIN	HUES6_Cells,NHEK-Epidermal_Keratinocyte_Primary_Cells,iPS_DF_19.11_Cells	ESC,SKIN,iPSC	.	.	.		.	C	T	T	T	T	T/T,T/T	rs138367475	AF=0.0119808	0.268	0.252	0.249	0.043	0.036	0.036	.	.	6.395	0.126639	.	RGS18
chr1	198596955	198596956	SNP	4	enhancer,motif_alter,openChrom,promoter	.	.	MOTIFBR=DHS#FOXP1_1#198596939#198596959#+#18#0.000000#0.013158,DHS#FOXA_known7#198596944#198596961#-#5#0.035203#0.153143,DHS#FOXJ3_1#198596944#198596961#-#5#0.127275#0.325924,DHS#FOXK1_1#198596944#198596961#-#5#0.116138#0.178053,DHS#FOXJ2_1#198596944#198596962#-#6#0.073171#0.170732,DHS#FOXD1_1#198596945#198596961#-#5#0.000000#0.150000,DHS#SRY_3#198596947#198596956#-#0#0.000000#0.071429,DHS#FOXO3_…	.	.	Primary_Natural_Killer_cells_from_peripheral_blood,Primary_T_cells_from_peripheral_blood	BLOOD	Primary_Natural_Killer_cells_from_peripheral_blood,Primary_T_cells_effector/memory_enriched_from_peripheral_blood,Primary_T_cells_from_cord_blood,Primary_T_cells_from_peripheral_blood,Primary_T_helper_17_cells_PMA-I_stimulated,Primary_T_helper_cells_PMA-I_stimulated,Primary_T_helper_memory_cells_from_peripheral_blood_1,Primary_T_helper_memory_cells_from_peripheral_blood_2,Primary_T_helper_naive_c…	BLOOD,GI_RECTUM	Bone_Marrow_Derived_Cultured_Mesenchymal_Stem_Cells,GM12878_Lymphoblastoid_Cells,Primary_Natural_Killer_cells_from_peripheral_blood,Primary_T_CD8+_memory_cells_from_peripheral_blood,Primary_T_cells_effector/memory_enriched_from_peripheral_blood,Primary_T_cells_from_peripheral_blood,Primary_T_helper_17_cells_PMA-I_stimulated,Primary_T_helper_cells_PMA-I_stimulated,Primary_T_helper_memory_cells_fro…	BLOOD,STRONAL_CONNECTIVE	.	.	.		.	C	G	G	G	G	G/G,G/G	rs12136379	AF=0.00738818	-0.247	-0.261	0.587	0	0	0.001	.	.	1.117	0.074388	5	ATP6V1G3,PTPRC
chr1	198597024	198597025	SNP	4	enhancer,motif_alter,openChrom,promoter	.	.	MOTIFBR=DHS#IRF_known10#198597010#198597028#+#16#0.083333#0.500000,DHS#IRF_known7#198597011#198597026#-#1#0.269231#0.423077	.	.	Primary_Natural_Killer_cells_from_peripheral_blood,Primary_T_cells_from_peripheral_blood	BLOOD	Primary_Natural_Killer_cells_from_peripheral_blood,Primary_T_cells_effector/memory_enriched_from_peripheral_blood,Primary_T_cells_from_cord_blood,Primary_T_cells_from_peripheral_blood,Primary_T_helper_17_cells_PMA-I_stimulated,Primary_T_helper_cells_PMA-I_stimulated,Primary_T_helper_memory_cells_from_peripheral_blood_1,Primary_T_helper_memory_cells_from_peripheral_blood_2,Primary_T_helper_naive_c…	BLOOD	Bone_Marrow_Derived_Cultured_Mesenchymal_Stem_Cells,GM12878_Lymphoblastoid_Cells,Primary_Natural_Killer_cells_from_peripheral_blood,Primary_T_CD8+_memory_cells_from_peripheral_blood,Primary_T_CD8+_naive_cells_from_peripheral_blood,Primary_T_cells_effector/memory_enriched_from_peripheral_blood,Primary_T_cells_from_peripheral_blood,Primary_T_helper_17_cells_PMA-I_stimulated,Primary_T_helper_cells_P…	BLOOD,STRONAL_CONNECTIVE	.	.	.		.	A	C	C	C	C	C/C,C/C	rs12126222	AF=0.00698882,0.000798722	-1.084	-1.212	-0.343	0	0	0.002	.	.	0.693	0.074388	5	ATP6V1G3,PTPRC
chr1	198603092	198603093	SNP	4	TFBS,enhancer,openChrom,promoter	ARID3A,ATF1,EP300,GATA1,GATA2,MAX,MYC,NFIC,POLR2A,RCOR1,RELA,RUNX3,SPI1,STAT1,STAT5A,TAL1,TBL1XR1,TBP	.	.	.	.	Primary_B_cells_from_peripheral_blood,Primary_T_cells_from_peripheral_blood,Primary_hematopoietic_stem_cells_G-CSF-mobilized_Female	BLOOD	Monocytes-CD14+_RO01746_Primary_Cells,Primary_T_CD8+_memory_cells_from_peripheral_blood,Primary_T_helper_17_cells_PMA-I_stimulated,Primary_T_helper_cells_PMA-I_stimulated,Primary_T_helper_naive_cells_from_peripheral_blood,Primary_hematopoietic_stem_cells_G-CSF-mobilized_Female,Primary_neutrophils_from_peripheral_blood	BLOOD	GM12878_Lymphoblastoid_Cells,K562_Leukemia_Cells,Monocytes-CD14+_RO01746_Primary_Cells,Primary_B_cells_from_peripheral_blood,Primary_Natural_Killer_cells_from_peripheral_blood,Primary_T_helper_17_cells_PMA-I_stimulated,Primary_T_helper_cells_PMA-I_stimulated,Primary_T_helper_memory_cells_from_peripheral_blood_1,Primary_T_helper_naive_cells_from_peripheral_blood,Primary_monocytes_from_peripheral_b…	BLOOD,GI_RECTUM,SPLEEN	.	.	.		.	A	T	T	T	T	T/T,T/T	rs72738008	AF=0.00678914	-1.745	-1.865	-0.421	0	0	0.001	.	.	0.223	0.084569	4	ATP6V1G3,PTPRC
chr1	203569594	203569595	SNP	4	DE_gene,TFBS,enhancer,motif_alter	YY1	.	MOTIFG=AP1_known10#203569592#203569599#-#4#8.154#4.159	.	.	.	.	.	.	Colon_Smooth_Muscle,Fetal_Adrenal_Gland,Fetal_Stomach,Foreskin_Melanocyte_Primary_Cells_skin01,Foreskin_Melanocyte_Primary_Cells_skin03,H1_BMP4_Derived_Trophoblast_Cultured_Cells,Left_Ventricle,Placenta,Sigmoid_Colon,hESC_Derived_CD184+_Endoderm_Cultured_Cells,hESC_Derived_CD56+_Mesoderm_Cultured_Cells	ADRENAL,ENDODERM,GI_COLON,GI_STOMACH,HEART,PLACENTA,SKIN,Trophoblast	.	.	ATP2B4	testis	.	A	G	G	G	G	G/G,G/G	rs16851907	AF=0.0429313	-0.116	-0.12	0.392	0.096	0.069	0.04	.	.	5.08	0.06567	4	ATP2B4,OPTC
chr1	207603432	207603433	SNP	4	TFBS,enhancer,openChrom,promoter	BCL11A,BCL3,EBF1,POU2F2,RAD21,RELA,RUNX3,SPI1	.	.	.	.	Primary_B_cells_from_peripheral_blood,Primary_hematopoietic_stem_cells_G-CSF-mobilized_Female	BLOOD	Primary_hematopoietic_stem_cells_G-CSF-mobilized_Female	BLOOD	GM12878_Lymphoblastoid_Cells,Primary_B_cells_from_peripheral_blood,Primary_hematopoietic_stem_cells_G-CSF-mobilized_Female,Sigmoid_Colon	BLOOD,GI_COLON	.	.	.		.	G	A	A	A	A	A/A,A/A	rs137977240	AF=0.00499201	-0.321	-0.359	0.334	0	0	0.007	.	.	2.624	0.108992	.	CD55,CR2
chr1	207627873	207627874	SNP	4	TFBS,enhancer,motif_alter,promoter	CTBP2,CTCF,E2F6,EZH2,MYC,NFATC1,NFIC,PML,POLR2A,POU2F2,SIN3A,SUZ12,TAF1,YY1,ZBTB7A,ZNF263	.	MOTIFBR=CTCF,DHS,ZNF263#PRDM1_disc1#207627865#207627875#-#1#0.106383#0.241135	.	.	.	.	A549_EtOH_0.02pct_Lung_Carcinoma_Cell_Line,Adipose_Derived_Mesenchymal_Stem_Cell_Cultured_Cells,Adipose_Nuclei,Brain_Angular_Gyrus,Brain_Anterior_Caudate,Brain_Cingulate_Gyrus,Brain_Dorsolateral_Prefrontal_Cortex,Brain_Germinal_Matrix,Brain_Hippocampus_Middle,Brain_Inferior_Temporal_Lobe,Brain_Substantia_Nigra,Breast_Myoepithelial_Primary_Cells,Colon_Smooth_Muscle,Colonic_Mucosa,Cortex_derived_pr…	ADRENAL,BLOOD,BRAIN,BREAST,ENDODERM,ESC,FAT,GI_COLON,GI_DUODENUM,GI_ESOPHAGUS,GI_INTESTINE,GI_RECTUM,GI_STOMACH,HEART,KIDNEY,LIVER,LUNG,MUSCLE,MUSCLE_LEG,OVARY,PANCREAS,PLACENTA,SKIN,SPLEEN,STROMAL_CONNECTIVE,STRONAL_CONNECTIVE,THYMUS,Trophoblast,iPSC	Brain_Cingulate_Gyrus,Brain_Hippocampus_Middle,Brain_Substantia_Nigra,Fetal_Thymus,Primary_B_cells_from_peripheral_blood,Primary_Natural_Killer_cells_from_peripheral_blood,Primary_T_CD8+_naive_cells_from_peripheral_blood,Primary_T_helper_cells_PMA-I_stimulated,Primary_T_helper_memory_cells_from_peripheral_blood_2,Primary_T_helper_naive_cells_from_peripheral_blood,Rectal_Mucosa_Donor_29,Rectal_Muc…	BLOOD,BRAIN,GI_INTESTINE,GI_RECTUM,SPLEEN,THYMUS	.	.	.		.	T	C	C	C	C	C/C,C/C	rs368839023	AF=0.00479233	-0.401	-0.598	0.486	0	0	0.202	.	.	10.49	0.166803	.	CR2
chr1	222885079	222885080	SNP	4	TFBS,enhancer,openChrom,promoter	E2F6,FOXM1,MAX,MTA3,POLR2A,RELA,TAF1,TFAP2A,TFAP2C,ZNF263	.	.	.	.	Breast_variant_Human_Mammary_Epithelial_Cells_(vHMEC),Fetal_Intestine_Large,Fetal_Intestine_Small,Fetal_Muscle_Leg,Foreskin_Fibroblast_Primary_Cells_skin01,Foreskin_Fibroblast_Primary_Cells_skin02,Foreskin_Keratinocyte_Primary_Cells_skin02,Foreskin_Melanocyte_Primary_Cells_skin01,H1_Derived_Neuronal_Progenitor_Cultured_Cells,Ovary,Psoas_Muscle,iPS_DF_6.9_Cells	BRAIN,BREAST,GI_INTESTINE,MUSCLE,MUSCLE_LEG,OVARY,SKIN,iPSC	A549_EtOH_0.02pct_Lung_Carcinoma_Cell_Line,Adipose_Derived_Mesenchymal_Stem_Cell_Cultured_Cells,Adipose_Nuclei,Aorta,Bone_Marrow_Derived_Cultured_Mesenchymal_Stem_Cells,Brain_Angular_Gyrus,Brain_Anterior_Caudate,Brain_Cingulate_Gyrus,Brain_Dorsolateral_Prefrontal_Cortex,Brain_Germinal_Matrix,Brain_Hippocampus_Middle,Brain_Inferior_Temporal_Lobe,Brain_Substantia_Nigra,Breast_Myoepithelial_Primary_…	ADRENAL,BLOOD,BONE,BRAIN,BREAST,CERVIX,ENDODERM,ESC,FAT,GI_COLON,GI_DUODENUM,GI_ESOPHAGUS,GI_INTESTINE,GI_RECTUM,GI_STOMACH,HEART,KIDNEY,LIVER,LUNG,MUSCLE,MUSCLE_LEG,Mesendoderm,OVARY,PANCREAS,PLACENTA,SKIN,SPLEEN,STROMAL_CONNECTIVE,STRONAL_CONNECTIVE,THYMUS,Trophoblast,VASCULAR,iPSC	A549_EtOH_0.02pct_Lung_Carcinoma_Cell_Line,Adipose_Nuclei,Aorta,Bone_Marrow_Derived_Cultured_Mesenchymal_Stem_Cells,Brain_Angular_Gyrus,Brain_Anterior_Caudate,Brain_Cingulate_Gyrus,Brain_Dorsolateral_Prefrontal_Cortex,Brain_Hippocampus_Middle,Brain_Inferior_Temporal_Lobe,Brain_Substantia_Nigra,Colon_Smooth_Muscle,Colonic_Mucosa,Dnd41_TCell_Leukemia_Cell_Line,Duodenum_Smooth_Muscle,Esophagus,Fetal…	ADRENAL,BLOOD,BONE,BRAIN,BREAST,CERVIX,ENDODERM,ESC,FAT,GI_COLON,GI_DUODENUM,GI_ESOPHAGUS,GI_INTESTINE,GI_RECTUM,GI_STOMACH,HEART,LIVER,LUNG,MUSCLE,MUSCLE_LEG,Mesendoderm,OVARY,PANCREAS,PLACENTA,SKIN,SPLEEN,STROMAL_CONNECTIVE,STRONAL_CONNECTIVE,THYMUS,Trophoblast,VASCULAR,iPSC	.	.	.		.	G	A	A	NA	A	A/A,A/A	rs76232264	AF=0.0107827	0.14	0.653	0.37	0	0.002	0.155	.	.	10.82	0.075627	4	AIDA,C1orf58
chr1	222909981	222909982	SNP	4	TFBS,TFBS_motif,enhancer,openChrom	BACH1,EP300,HDAC2,RXRA,TEAD4	UA9	.	.	.	H1_BMP4_Derived_Mesendoderm_Cultured_Cells,H1_Cells,H1_Derived_Neuronal_Progenitor_Cultured_Cells,H9_Cells,iPS_DF_19.11_Cells,iPS_DF_6.9_Cells	BRAIN,ESC,Mesendoderm,iPSC	.	.	Brain_Anterior_Caudate,Brain_Cingulate_Gyrus,Brain_Inferior_Temporal_Lobe,Colonic_Mucosa,Fetal_Stomach,Gastric,H1_Derived_Mesenchymal_Stem_Cells,HUES48_Cells,Lung,Pancreatic_Islets,Primary_B_cells_from_peripheral_blood,Primary_T_helper_cells_PMA-I_stimulated,hESC_Derived_CD184+_Endoderm_Cultured_Cells,hESC_Derived_CD56+_Ectoderm_Cultured_Cells	BLOOD,BRAIN,ENDODERM,ESC,GI_COLON,GI_STOMACH,LUNG,PANCREAS,STROMAL_CONNECTIVE	.	.	.		.	A	G	G	NA	G	G/G,G/G	rs74712374	AF=0.0107827	1.53	1.504	0.581	0	0	0.001	.	.	3.906	0.235255	4	C1orf58,DISP1
chr1	222910546	222910547	SNP	4	TFBS,enhancer,openChrom,promoter	FOSL2	.	.	.	.	Fetal_Intestine_Large,Fetal_Stomach,Foreskin_Keratinocyte_Primary_Cells_skin02,Gastric,Pancreas,Small_Intestine	GI_INTESTINE,GI_STOMACH,PANCREAS,SKIN	HUES6_Cells,Primary_B_cells_from_peripheral_blood,Stomach_Mucosa,iPS-15b_Cells,iPS-20b_Cells	BLOOD,ESC,GI_STOMACH,iPSC	Brain_Anterior_Caudate,Brain_Hippocampus_Middle,Fetal_Stomach,Gastric,H1_Cells,HUES64_Cells,Primary_B_cells_from_peripheral_blood,Primary_T_helper_cells_PMA-I_stimulated,hESC_Derived_CD56+_Mesoderm_Cultured_Cells,iPS-20b_Cells	BLOOD,BRAIN,ENDODERM,ESC,GI_STOMACH,iPSC	.	.	.		.	A	G	G	NA	G	G/G,G/G	rs117833164	AF=0.0107827	-0.798	-0.84	0.462	0	0	0.027	.	.	4.222	0.062308	5	C1orf58,DISP1
chr1	222912331	222912332	SNP	4	TFBS,enhancer,openChrom,promoter	CTCF,RAD21,SMC3,ZNF263	.	.	.	.	H1_BMP4_Derived_Trophoblast_Cultured_Cells	Trophoblast	Brain_Hippocampus_Middle,Duodenum_Smooth_Muscle,Primary_B_cells_from_cord_blood,Primary_B_cells_from_peripheral_blood,Primary_Natural_Killer_cells_from_peripheral_blood,Stomach_Mucosa	BLOOD,BRAIN,GI_DUODENUM,GI_STOMACH	Brain_Anterior_Caudate,Brain_Hippocampus_Middle,Brain_Substantia_Nigra,Fetal_Stomach,Gastric,Primary_B_cells_from_peripheral_blood,Primary_Natural_Killer_cells_from_peripheral_blood,Rectal_Mucosa_Donor_31	BLOOD,BRAIN,GI_RECTUM,GI_STOMACH	.	.	.		.	A	G	G	NA	G	G/G,G/G	rs142483408	AF=0.0107827	-0.604	-0.855	-0.478	0	0	0.001	.	.	2.642	0	.	C1orf58,DISP1
chr10	75346401	75346402	SNP	4	eQTL,enhancer,motif_alter,promoter	.	.	MOTIFBR=CCNT2,DHS,FOS,GATA2,RFX5,TBP,TCF7L2,TRIM28#YY1_known1#75346399#75346416#-#14#0.222222#0.333333	Adipose_Subcutaneous,Adipose_Visceral,Artery_Aorta,Artery_Coronary,Artery_Tibial,Esophagus_Mucosa,Esophagus_Muscularis,Lung,Muscle_Skeletal,Nerve_Tibial,Skin_Not_Sun_Exposed_Suprapubic,Skin_Sun_Exposed_Lower_leg,Stomach,Thyroid,Whole_Blood,fibroblasts	.	.	.	Adipose_Derived_Mesenchymal_Stem_Cell_Cultured_Cells,Bone_Marrow_Derived_Cultured_Mesenchymal_Stem_Cells,Brain_Anterior_Caudate,Brain_Hippocampus_Middle,Mesenchymal_Stem_Cell_Derived_Adipocyte_Cultured_Cells,Primary_hematopoietic_stem_cells,Primary_hematopoietic_stem_cells_G-CSF-mobilized_Female,Primary_hematopoietic_stem_cells_G-CSF-mobilized_Male,Rectal_Mucosa_Donor_31	BLOOD,BRAIN,FAT,GI_RECTUM,STRONAL_CONNECTIVE	Adipose_Nuclei,Bone_Marrow_Derived_Cultured_Mesenchymal_Stem_Cells,Brain_Angular_Gyrus,Brain_Anterior_Caudate,Brain_Cingulate_Gyrus,Brain_Dorsolateral_Prefrontal_Cortex,Brain_Hippocampus_Middle,Brain_Inferior_Temporal_Lobe,Brain_Substantia_Nigra,Colon_Smooth_Muscle,Colonic_Mucosa,Duodenum_Smooth_Muscle,Fetal_Adrenal_Gland,Fetal_Intestine_Large,Fetal_Intestine_Small,Foreskin_Melanocyte_Primary_Cel…	ADRENAL,BLOOD,BONE,BRAIN,CERVIX,ENDODERM,FAT,GI_COLON,GI_DUODENUM,GI_INTESTINE,GI_RECTUM,GI_STOMACH,LIVER,MUSCLE,PANCREAS,SKIN,STROMAL_CONNECTIVE,STRONAL_CONNECTIVE	.	.	.		.	C	G	G	G	G	G/G,G/G	rs16930725	AF=0.0638978	0.628	0.636	-0.169	0.001	0.001	0.002	.	.	1.052	0.119485	2b	MYOZ1,USP54
chr10	75347300	75347301	SNP	4	eQTL,enhancer,openChrom,promoter	.	.	.	Adipose_Subcutaneous,Adipose_Visceral,Artery_Aorta,Artery_Coronary,Artery_Tibial,Esophagus_Mucosa,Esophagus_Muscularis,Lung,Muscle_Skeletal,Nerve_Tibial,Skin_Not_Sun_Exposed_Suprapubic,Skin_Sun_Exposed_Lower_leg,Stomach,Thyroid,Whole_Blood,fibroblasts	.	Primary_hematopoietic_stem_cells_G-CSF-mobilized_Female	BLOOD	Brain_Angular_Gyrus,Brain_Hippocampus_Middle,Brain_Substantia_Nigra,Rectal_Mucosa_Donor_31	BRAIN,GI_RECTUM	Brain_Angular_Gyrus,Brain_Anterior_Caudate,Brain_Cingulate_Gyrus,Brain_Dorsolateral_Prefrontal_Cortex,Brain_Hippocampus_Middle,Brain_Inferior_Temporal_Lobe,Brain_Substantia_Nigra,Colon_Smooth_Muscle,Colonic_Mucosa,Fetal_Intestine_Large,Fetal_Intestine_Small,Rectal_Mucosa_Donor_29,Rectal_Mucosa_Donor_31	BRAIN,GI_COLON,GI_INTESTINE,GI_RECTUM	.	.	.		.	T	A	A	A	A	A/A,A/A	rs16930728	AF=0.0632987	-0.594	-0.7	-0.513	0	0	0.003	.	.	3.727	0.095506	.	MYOZ1,USP54
chr10	112676466	112676467	SNC	4	TFBS,enhancer,openChrom,promoter	BRCA1,CEBPB,CHD2,EP300,ESR1,FOS,FOXA1,FOXP2,GATA2,GATA3,GTF2F1,JUN,JUND,KAP1,MAFK,MAX,MYC,POLR2A,RAD21,RCOR1,RFX5,SIN3AK20,STAT3,TBP,TCF12,TCF7L2,ZNF217,ZNF263	.	.	.	.	Foreskin_Fibroblast_Primary_Cells_skin01,Foreskin_Fibroblast_Primary_Cells_skin02,H1_BMP4_Derived_Mesendoderm_Cultured_Cells,H1_Derived_Mesenchymal_Stem_Cells,H9_Cells,IMR90_fetal_lung_fibroblasts_Cell_Line,Pancreas,Placenta,Psoas_Muscle	ESC,LUNG,MUSCLE,Mesendoderm,PANCREAS,PLACENTA,SKIN,STROMAL_CONNECTIVE	A549_EtOH_0.02pct_Lung_Carcinoma_Cell_Line,Duodenum_Mucosa,HUES48_Cells,HUES64_Cells,HeLa-S3_Cervical_Carcinoma_Cell_Line,Liver,Osteoblast_Primary_Cells	BONE,CERVIX,ESC,GI_DUODENUM,LIVER,LUNG	Bone_Marrow_Derived_Cultured_Mesenchymal_Stem_Cells,Brain_Inferior_Temporal_Lobe,Foreskin_Fibroblast_Primary_Cells_skin01,Foreskin_Fibroblast_Primary_Cells_skin02,H1_BMP4_Derived_Mesendoderm_Cultured_Cells,H1_Cells,H9_Cells,HSMM_cell_derived_Skeletal_Muscle_Myotubes_Cells,HUES48_Cells,HUES64_Cells,HeLa-S3_Cervical_Carcinoma_Cell_Line,NH-A_Astrocytes_Primary_Cells,Osteoblast_Primary_Cells,Primary_…	BLOOD,BONE,BRAIN,CERVIX,ENDODERM,ESC,MUSCLE,Mesendoderm,SKIN,STRONAL_CONNECTIVE	.	.	.		.	C	A	A	A	A	A/A,A/A	.	0	2.739	2.137	0.457	1	1	0.966	1038.4	3.53113e-144	16.6	0.114469	.	SHOC2
chr10	121529459	121529460	SNP	4	TFBS,eQTL,enhancer,promoter	CEBPB,EP300,FOS,GATA2,JUN,JUND,MAX,POLR2A,RCOR1,RFX5	.	.	testis	.	.	.	ES-WA7_Cells,NHEK-Epidermal_Keratinocyte_Primary_Cells,hESC_Derived_CD184+_Endoderm_Cultured_Cells	ENDODERM,ESC,SKIN	Duodenum_Smooth_Muscle,Foreskin_Melanocyte_Primary_Cells_skin03,HSMM_Skeletal_Muscle_Myoblasts_Cells,HSMM_cell_derived_Skeletal_Muscle_Myotubes_Cells,HUES48_Cells,HUVEC_Umbilical_Vein_Endothelial_Primary_Cells,HeLa-S3_Cervical_Carcinoma_Cell_Line,NHEK-Epidermal_Keratinocyte_Primary_Cells,Osteoblast_Primary_Cells,Placenta,Rectal_Smooth_Muscle,hESC_Derived_CD56+_Mesoderm_Cultured_Cells	BONE,CERVIX,ENDODERM,ESC,GI_DUODENUM,GI_RECTUM,MUSCLE,PLACENTA,SKIN,VASCULAR	.	.	.		.	T	C	C	C	C	C/C,C/C	rs61867896	AF=0.0714856	0.244	0.062	-0.381	0.001	0.001	0.001	.	.	0.54	0.108992	4	INPP5F,SEC23IP
chr11	29979124	29979125	indel	4	enhancer,motif_alter,openChrom,promoter	.	.	MOTIFBR=DHS#TRIM28_disc2#29979116#29979125#-	.	.	Fetal_Adrenal_Gland,H1_BMP4_Derived_Mesendoderm_Cultured_Cells	ADRENAL,Mesendoderm	NHEK-Epidermal_Keratinocyte_Primary_Cells	SKIN	hESC_Derived_CD56+_Mesoderm_Cultured_Cells	ENDODERM	.	.	.		.	TG	T	T	T	T	T/T,T/T	rs5790773	AF=0.957069	0.037	0.013	0.439	0.001	0.001	0.007	.	.	1.053	0.126639	.	KCNA4
chr11	29979125	29979126	indel	4	enhancer,motif_alter,openChrom,promoter	.	.	MOTIFBR=DHS#TRIM28_disc2#29979116#29979125#-	.	.	Fetal_Adrenal_Gland,H1_BMP4_Derived_Mesendoderm_Cultured_Cells	ADRENAL,Mesendoderm	NHEK-Epidermal_Keratinocyte_Primary_Cells	SKIN	hESC_Derived_CD56+_Mesoderm_Cultured_Cells	ENDODERM	.	.	.		.	TG	T	T	T	T	T/T,T/T	rs5790773	AF=0.957069	0.037	0.013	0.439	0.001	0.001	0.007	.	.	0.787	0.126639	.	KCNA4
chr11	30039167	30039168	SNP	4	TFBS,enhancer,openChrom,promoter	EZH2	.	.	.	.	Fetal_Brain_Female,H1_Derived_Neuronal_Progenitor_Cultured_Cells,iPS_DF_19.11_Cells	BRAIN,iPSC	Adipose_Nuclei,Brain_Angular_Gyrus,Brain_Anterior_Caudate,Brain_Cingulate_Gyrus,Brain_Dorsolateral_Prefrontal_Cortex,Brain_Germinal_Matrix,Brain_Hippocampus_Middle,Brain_Inferior_Temporal_Lobe,Brain_Substantia_Nigra,ES-UCSF4_Cells,ES-WA7_Cells,Fetal_Adrenal_Gland,Fetal_Brain_Female,Fetal_Muscle_Leg,Fetal_Muscle_Trunk,Fetal_Stomach,Ganglion_Eminence_derived_primary_cultured_neurospheres,H1_Cells,H…	ADRENAL,BLOOD,BRAIN,ENDODERM,ESC,FAT,GI_STOMACH,HEART,MUSCLE,MUSCLE_LEG,iPSC	Fetal_Stomach	GI_STOMACH	.	.	.		.	T	C	C	C	C	C/C,C/C	rs117902682	AF=0.0161741	1.16	2.147	0.651	0.001	0.001	0.003	.	.	8.204	0.166803	5	KCNA4
chr11	63304422	63304423	SNC	4	TFBS,enhancer,openChrom,promoter	CTCF,IRF1,POLR2A,POU2F2,RUNX3,TBP	.	.	.	.	Breast_variant_Human_Mammary_Epithelial_Cells_(vHMEC),Fetal_Adrenal_Gland,Fetal_Brain_Male,Fetal_Kidney,Fetal_Muscle_Trunk,Fetal_Stomach,Foreskin_Fibroblast_Primary_Cells_skin01,Foreskin_Fibroblast_Primary_Cells_skin02,H1_BMP4_Derived_Mesendoderm_Cultured_Cells,Ovary	ADRENAL,BRAIN,BREAST,GI_STOMACH,KIDNEY,MUSCLE,Mesendoderm,OVARY,SKIN	A549_EtOH_0.02pct_Lung_Carcinoma_Cell_Line,Adipose_Derived_Mesenchymal_Stem_Cell_Cultured_Cells,Adipose_Nuclei,Aorta,Bone_Marrow_Derived_Cultured_Mesenchymal_Stem_Cells,Brain_Angular_Gyrus,Brain_Anterior_Caudate,Brain_Cingulate_Gyrus,Brain_Dorsolateral_Prefrontal_Cortex,Brain_Germinal_Matrix,Brain_Hippocampus_Middle,Brain_Inferior_Temporal_Lobe,Brain_Substantia_Nigra,Breast_Myoepithelial_Primary_…	ADRENAL,BLOOD,BONE,BRAIN,BREAST,CERVIX,FAT,GI_COLON,GI_DUODENUM,GI_ESOPHAGUS,GI_INTESTINE,GI_RECTUM,GI_STOMACH,HEART,KIDNEY,LIVER,LUNG,MUSCLE,MUSCLE_LEG,OVARY,PANCREAS,PLACENTA,SKIN,SPLEEN,STROMAL_CONNECTIVE,STRONAL_CONNECTIVE,THYMUS,VASCULAR	Adipose_Nuclei,Aorta,Bone_Marrow_Derived_Cultured_Mesenchymal_Stem_Cells,Brain_Angular_Gyrus,Brain_Anterior_Caudate,Brain_Cingulate_Gyrus,Brain_Dorsolateral_Prefrontal_Cortex,Brain_Hippocampus_Middle,Brain_Inferior_Temporal_Lobe,Brain_Substantia_Nigra,Colon_Smooth_Muscle,Colonic_Mucosa,Dnd41_TCell_Leukemia_Cell_Line,Duodenum_Smooth_Muscle,Esophagus,Fetal_Adrenal_Gland,Fetal_Intestine_Large,Fetal_…	ADRENAL,BLOOD,BONE,BRAIN,CERVIX,FAT,GI_COLON,GI_DUODENUM,GI_ESOPHAGUS,GI_INTESTINE,GI_RECTUM,GI_STOMACH,HEART,LIVER,LUNG,MUSCLE,MUSCLE_LEG,OVARY,PANCREAS,PLACENTA,SKIN,SPLEEN,STROMAL_CONNECTIVE,STRONAL_CONNECTIVE,THYMUS,VASCULAR	.	.	.		.	A	G	G	G	G	G/G,G/G	.	0	0.312	0.318	-0.318	0	0	0.001	.	.	2.526	0.166803	.	RARRES3
chr11	64877018	64877019	SNP	4	TFBS,enhancer,openChrom,promoter	POLR2A	.	.	.	.	Fetal_Muscle_Trunk	MUSCLE	Foreskin_Fibroblast_Primary_Cells_skin01,Gastric	GI_STOMACH,SKIN	Brain_Angular_Gyrus,Brain_Hippocampus_Middle,Brain_Inferior_Temporal_Lobe,Brain_Substantia_Nigra,Foreskin_Fibroblast_Primary_Cells_skin02,Lung,Primary_T_helper_memory_cells_from_peripheral_blood_1	BLOOD,BRAIN,LUNG,SKIN	.	.	.		.	A	G	G	G	G	G/G,G/G	rs79069813	AF=0.0585064	1.791	2.144	0.557	0.024	0.02	0.002	.	.	5.249	0.115753	3a	TM7SF2
chr11	64884956	64884957	SNC	4	TFBS,enhancer,openChrom,promoter	BCL3,CHD1,E2F6,ETS1,FOXM1,GABPA,GTF2F1,HDAC1,MAX,MTA3,MXI1,MYC,NR2C2,NRF1,PAX5,PHF8,PML,POLR2A,RBBP5,RELA,SAP30,SIN3A,SIN3AK20,SIX5,SP4,STAT5A,TAF1,TAF7,TBP,TCF12,TCF3,THAP1,UBTF,YY1,ZBTB33,ZNF263	.	.	.	.	H1_Derived_Neuronal_Progenitor_Cultured_Cells	BRAIN	A549_EtOH_0.02pct_Lung_Carcinoma_Cell_Line,Adipose_Derived_Mesenchymal_Stem_Cell_Cultured_Cells,Adipose_Nuclei,Aorta,Bone_Marrow_Derived_Cultured_Mesenchymal_Stem_Cells,Brain_Angular_Gyrus,Brain_Anterior_Caudate,Brain_Cingulate_Gyrus,Brain_Dorsolateral_Prefrontal_Cortex,Brain_Germinal_Matrix,Brain_Hippocampus_Middle,Brain_Inferior_Temporal_Lobe,Brain_Substantia_Nigra,Breast_Myoepithelial_Primary_…	ADRENAL,BLOOD,BONE,BRAIN,BREAST,CERVIX,ENDODERM,ESC,FAT,GI_COLON,GI_DUODENUM,GI_ESOPHAGUS,GI_INTESTINE,GI_RECTUM,GI_STOMACH,HEART,KIDNEY,LIVER,LUNG,MUSCLE,MUSCLE_LEG,Mesendoderm,OVARY,PANCREAS,PLACENTA,SKIN,SPLEEN,STROMAL_CONNECTIVE,STRONAL_CONNECTIVE,THYMUS,Trophoblast,VASCULAR,iPSC	A549_EtOH_0.02pct_Lung_Carcinoma_Cell_Line,Adipose_Nuclei,Aorta,Bone_Marrow_Derived_Cultured_Mesenchymal_Stem_Cells,Brain_Angular_Gyrus,Brain_Anterior_Caudate,Brain_Cingulate_Gyrus,Brain_Dorsolateral_Prefrontal_Cortex,Brain_Hippocampus_Middle,Brain_Inferior_Temporal_Lobe,Brain_Substantia_Nigra,Colon_Smooth_Muscle,Colonic_Mucosa,Dnd41_TCell_Leukemia_Cell_Line,Duodenum_Smooth_Muscle,Esophagus,Fetal…	ADRENAL,BLOOD,BONE,BRAIN,BREAST,CERVIX,ENDODERM,ESC,FAT,GI_COLON,GI_DUODENUM,GI_ESOPHAGUS,GI_INTESTINE,GI_RECTUM,GI_STOMACH,HEART,LIVER,LUNG,MUSCLE,MUSCLE_LEG,Mesendoderm,OVARY,PANCREAS,PLACENTA,SKIN,SPLEEN,STROMAL_CONNECTIVE,STRONAL_CONNECTIVE,THYMUS,Trophoblast,VASCULAR,iPSC	.	.	.		.	A	G	G	G	G	G/G,G/G	.	0	1.525	1.247	0.651	0.999	0.998	0.944	2429.9	6.8866e-215	6.663	0.441713	.	MRPL49,ZNHIT2
chr11	64889625	64889626	SNC	4	TFBS,enhancer,openChrom,promoter	ATF1,ATF3,BCLAF1,BRCA1,CCNT2,CEBPB,CHD2,CTCF,E2F1,E2F4,EGR1,ELF1,ELK1,EP300,FOXA1,FOXP2,GABPA,GTF2F1,HDAC1,HMGN3,IRF1,JUND,KDM5B,MAX,MAZ,MTA3,MXI1,MYC,NFYA,NFYB,NR3C1,NRF1,PAX5,PHF8,PML,POLR2A,POU2F2,RBBP5,RCOR1,RELA,RFX5,RUNX3,SAP30,SIN3A,SIN3AK20,SIX5,SMC3,SP1,SP4,SPI1,SREBP1,SRF,STAT1,TAF1,TBL1XR1,TBP,TCF12,TCF3,TCF7L2,TEAD4,UBTF,WRNIP1,YY1,ZBTB7A,ZEB1	.	.	.	.	Fetal_Adrenal_Gland,Fetal_Brain_Female,Fetal_Brain_Male,Fetal_Heart,Fetal_Intestine_Large,Fetal_Intestine_Small,Fetal_Kidney,Fetal_Lung,Fetal_Muscle_Leg,Fetal_Muscle_Trunk,Fetal_Stomach,Fetal_Thymus,Foreskin_Fibroblast_Primary_Cells_skin01,Foreskin_Fibroblast_Primary_Cells_skin02,Foreskin_Keratinocyte_Primary_Cells_skin02,Foreskin_Melanocyte_Primary_Cells_skin01,Gastric,H1_BMP4_Derived_Mesendoder…	ADRENAL,BLOOD,BRAIN,GI_INTESTINE,GI_STOMACH,HEART,KIDNEY,LUNG,MUSCLE,MUSCLE_LEG,Mesendoderm,OVARY,PANCREAS,SKIN,STROMAL_CONNECTIVE,THYMUS,iPSC	A549_EtOH_0.02pct_Lung_Carcinoma_Cell_Line,Adipose_Derived_Mesenchymal_Stem_Cell_Cultured_Cells,Adipose_Nuclei,Bone_Marrow_Derived_Cultured_Mesenchymal_Stem_Cells,Brain_Angular_Gyrus,Brain_Anterior_Caudate,Brain_Cingulate_Gyrus,Brain_Dorsolateral_Prefrontal_Cortex,Brain_Germinal_Matrix,Brain_Hippocampus_Middle,Brain_Inferior_Temporal_Lobe,Brain_Substantia_Nigra,Breast_Myoepithelial_Primary_Cells,…	ADRENAL,BLOOD,BONE,BRAIN,BREAST,CERVIX,ENDODERM,ESC,FAT,GI_COLON,GI_DUODENUM,GI_ESOPHAGUS,GI_INTESTINE,GI_RECTUM,GI_STOMACH,HEART,KIDNEY,LIVER,LUNG,MUSCLE,MUSCLE_LEG,OVARY,PANCREAS,PLACENTA,SKIN,SPLEEN,STROMAL_CONNECTIVE,STRONAL_CONNECTIVE,THYMUS,Trophoblast,VASCULAR,iPSC	A549_EtOH_0.02pct_Lung_Carcinoma_Cell_Line,Adipose_Nuclei,Bone_Marrow_Derived_Cultured_Mesenchymal_Stem_Cells,Brain_Angular_Gyrus,Brain_Anterior_Caudate,Brain_Cingulate_Gyrus,Brain_Dorsolateral_Prefrontal_Cortex,Brain_Hippocampus_Middle,Brain_Inferior_Temporal_Lobe,Brain_Substantia_Nigra,Colon_Smooth_Muscle,Colonic_Mucosa,Dnd41_TCell_Leukemia_Cell_Line,Duodenum_Smooth_Muscle,Esophagus,Fetal_Adren…	ADRENAL,BLOOD,BONE,BRAIN,BREAST,CERVIX,ENDODERM,ESC,FAT,GI_COLON,GI_DUODENUM,GI_ESOPHAGUS,GI_INTESTINE,GI_RECTUM,GI_STOMACH,HEART,LIVER,LUNG,MUSCLE,MUSCLE_LEG,PANCREAS,PLACENTA,SKIN,SPLEEN,STROMAL_CONNECTIVE,STRONAL_CONNECTIVE,THYMUS,VASCULAR	.	.	.		.	A	C	C	C	C	C/C,C/C	.	0	0.502	0.333	-0.808	0.021	0.003	0.001	.	.	4.423	0.08998	.	FAU,MRPL49,ZNHIT2
chr11	64900742	64900743	SNC	4	TFBS,enhancer,motif_alter,promoter	ELF1,MAZ,POLR2A,RELA,ZEB1,ZNF263	.	MOTIFBR=DHS,ELF1,ZNF263#RUNX2_4#64900740#64900756#-#13#0.033054#0.050242,DHS,ELF1,ZNF263#RUNX3_1#64900740#64900756#-#13#0.024306#0.048611	.	.	.	.	A549_EtOH_0.02pct_Lung_Carcinoma_Cell_Line,Adipose_Derived_Mesenchymal_Stem_Cell_Cultured_Cells,Adipose_Nuclei,Bone_Marrow_Derived_Cultured_Mesenchymal_Stem_Cells,Brain_Angular_Gyrus,Brain_Anterior_Caudate,Brain_Cingulate_Gyrus,Brain_Dorsolateral_Prefrontal_Cortex,Brain_Germinal_Matrix,Brain_Hippocampus_Middle,Brain_Inferior_Temporal_Lobe,Brain_Substantia_Nigra,Breast_Myoepithelial_Primary_Cells,…	ADRENAL,BLOOD,BONE,BRAIN,BREAST,CERVIX,ENDODERM,ESC,FAT,GI_COLON,GI_DUODENUM,GI_INTESTINE,GI_RECTUM,GI_STOMACH,HEART,KIDNEY,LIVER,LUNG,MUSCLE,MUSCLE_LEG,PANCREAS,PLACENTA,SKIN,SPLEEN,STROMAL_CONNECTIVE,STRONAL_CONNECTIVE,THYMUS,iPSC	Adipose_Nuclei,Brain_Angular_Gyrus,Brain_Cingulate_Gyrus,Brain_Hippocampus_Middle,Colon_Smooth_Muscle,Colonic_Mucosa,Duodenum_Smooth_Muscle,Esophagus,Fetal_Muscle_Leg,Fetal_Stomach,Foreskin_Fibroblast_Primary_Cells_skin01,Foreskin_Fibroblast_Primary_Cells_skin02,Foreskin_Melanocyte_Primary_Cells_skin01,Foreskin_Melanocyte_Primary_Cells_skin03,GM12878_Lymphoblastoid_Cells,HeLa-S3_Cervical_Carcinom…	BLOOD,BONE,BRAIN,CERVIX,FAT,GI_COLON,GI_DUODENUM,GI_ESOPHAGUS,GI_RECTUM,GI_STOMACH,HEART,LIVER,LUNG,MUSCLE,MUSCLE_LEG,PANCREAS,SKIN,SPLEEN	.	.	.		.	G	A	A	A	A	A/A,A/A	.	0	-0.774	-0.837	-0.278	0	0	0.052	2470.7	1.09745e-194	0.302	0.08998	.	MRPL49,SYVN1
chr11	64902381	64902382	SNP	4	TFBS,enhancer,openChrom,promoter	ATF2,BHLHE40,CHD1,CHD2,EGR1,ELF1,EP300,ETS1,FOSL2,FOXA1,FOXM1,GABPA,GTF2F1,JUN,JUND,KAP1,MAFF,MAX,MAZ,MYBL2,MYC,NFIC,PHF8,PML,POLR2A,RBBP5,RFX5,SIN3A,SIN3AK20,SIX5,SMARCB1,STAT2,STAT3,TAF1,TBP,TCF12,TCF7L2,TEAD4,USF1,WRNIP1,YY1,ZKSCAN1	.	.	.	.	Fetal_Brain_Female,H1_BMP4_Derived_Trophoblast_Cultured_Cells	BRAIN,Trophoblast	A549_EtOH_0.02pct_Lung_Carcinoma_Cell_Line,Adipose_Derived_Mesenchymal_Stem_Cell_Cultured_Cells,Adipose_Nuclei,Aorta,Bone_Marrow_Derived_Cultured_Mesenchymal_Stem_Cells,Brain_Angular_Gyrus,Brain_Anterior_Caudate,Brain_Cingulate_Gyrus,Brain_Dorsolateral_Prefrontal_Cortex,Brain_Germinal_Matrix,Brain_Hippocampus_Middle,Brain_Inferior_Temporal_Lobe,Brain_Substantia_Nigra,Breast_Myoepithelial_Primary_…	ADRENAL,BLOOD,BONE,BRAIN,BREAST,CERVIX,ENDODERM,ESC,FAT,GI_COLON,GI_DUODENUM,GI_ESOPHAGUS,GI_INTESTINE,GI_RECTUM,GI_STOMACH,HEART,KIDNEY,LIVER,LUNG,MUSCLE,MUSCLE_LEG,Mesendoderm,OVARY,PANCREAS,PLACENTA,SKIN,SPLEEN,STROMAL_CONNECTIVE,STRONAL_CONNECTIVE,THYMUS,Trophoblast,VASCULAR,iPSC	A549_EtOH_0.02pct_Lung_Carcinoma_Cell_Line,Adipose_Nuclei,Aorta,Bone_Marrow_Derived_Cultured_Mesenchymal_Stem_Cells,Brain_Angular_Gyrus,Brain_Anterior_Caudate,Brain_Cingulate_Gyrus,Brain_Dorsolateral_Prefrontal_Cortex,Brain_Hippocampus_Middle,Brain_Inferior_Temporal_Lobe,Brain_Substantia_Nigra,Colon_Smooth_Muscle,Colonic_Mucosa,Dnd41_TCell_Leukemia_Cell_Line,Duodenum_Smooth_Muscle,Esophagus,Fetal…	ADRENAL,BLOOD,BONE,BRAIN,BREAST,CERVIX,ENDODERM,ESC,FAT,GI_COLON,GI_DUODENUM,GI_ESOPHAGUS,GI_INTESTINE,GI_RECTUM,GI_STOMACH,HEART,LIVER,LUNG,MUSCLE,MUSCLE_LEG,Mesendoderm,OVARY,PANCREAS,PLACENTA,SKIN,SPLEEN,STROMAL_CONNECTIVE,STRONAL_CONNECTIVE,THYMUS,Trophoblast,VASCULAR,iPSC	.	.	.		.	G	A	A	A	A	A/A,A/A	rs552926987	AF=0.000199681	-1.461	-1.437	-0.377	0	0	0.003	.	.	6.346	0.046548	.	SYVN1
chr11	64902888	64902889	SNC	4	TFBS,enhancer,openChrom,promoter	E2F1,E2F4,E2F6,GATA3,GTF2F1,KAP1,MAX,MYC,NFYA,PHF8,PML,POLR2A,RAD21,RBBP5,SAP30,SIN3A,SIN3AK20,SMARCC1,TAF1,TAF7,TBP,TCF12,TFAP2A,TFAP2C	.	.	.	.	Fetal_Brain_Male,Fetal_Kidney,H1_BMP4_Derived_Trophoblast_Cultured_Cells,Primary_hematopoietic_stem_cells_G-CSF-mobilized_Female	BLOOD,BRAIN,KIDNEY,Trophoblast	A549_EtOH_0.02pct_Lung_Carcinoma_Cell_Line,Adipose_Derived_Mesenchymal_Stem_Cell_Cultured_Cells,Adipose_Nuclei,Aorta,Bone_Marrow_Derived_Cultured_Mesenchymal_Stem_Cells,Brain_Angular_Gyrus,Brain_Anterior_Caudate,Brain_Cingulate_Gyrus,Brain_Dorsolateral_Prefrontal_Cortex,Brain_Germinal_Matrix,Brain_Hippocampus_Middle,Brain_Inferior_Temporal_Lobe,Brain_Substantia_Nigra,Breast_Myoepithelial_Primary_…	ADRENAL,BLOOD,BONE,BRAIN,BREAST,CERVIX,ENDODERM,ESC,FAT,GI_COLON,GI_DUODENUM,GI_ESOPHAGUS,GI_INTESTINE,GI_RECTUM,GI_STOMACH,HEART,KIDNEY,LIVER,LUNG,MUSCLE,MUSCLE_LEG,Mesendoderm,OVARY,PANCREAS,PLACENTA,SKIN,STROMAL_CONNECTIVE,STRONAL_CONNECTIVE,THYMUS,Trophoblast,VASCULAR,iPSC	A549_EtOH_0.02pct_Lung_Carcinoma_Cell_Line,Adipose_Nuclei,Aorta,Bone_Marrow_Derived_Cultured_Mesenchymal_Stem_Cells,Brain_Angular_Gyrus,Brain_Anterior_Caudate,Brain_Cingulate_Gyrus,Brain_Dorsolateral_Prefrontal_Cortex,Brain_Hippocampus_Middle,Brain_Inferior_Temporal_Lobe,Brain_Substantia_Nigra,Colon_Smooth_Muscle,Colonic_Mucosa,Dnd41_TCell_Leukemia_Cell_Line,Duodenum_Smooth_Muscle,Esophagus,Fetal…	ADRENAL,BLOOD,BONE,BRAIN,BREAST,CERVIX,ENDODERM,ESC,FAT,GI_COLON,GI_DUODENUM,GI_ESOPHAGUS,GI_INTESTINE,GI_RECTUM,GI_STOMACH,HEART,LIVER,LUNG,MUSCLE,MUSCLE_LEG,Mesendoderm,OVARY,PANCREAS,PLACENTA,SKIN,SPLEEN,STROMAL_CONNECTIVE,STRONAL_CONNECTIVE,THYMUS,VASCULAR,iPSC	.	.	.		.	C	T	T	T	T	T/T,T/T	.	0	0.003	-0.026	-0.319	0	0	0.001	.	.	5.797	0	.	SYVN1
chr11	64913404	64913405	SNC	4	TFBS,enhancer,motif_alter,openChrom	CTCF	.	MOTIFBR=DHS#BDP1_disc3#64913393#64913407#-#2#0.210526#0.223684	.	.	Foreskin_Fibroblast_Primary_Cells_skin02	SKIN	.	.	Liver	LIVER	.	.	.		.	G	A	A	A	A	A/A,A/A	.	0	0.286	0.503	0.166	0.974	0.483	0.023	.	.	5.167	0.074388	.	SPDYC,SYVN1
chr11	64918385	64918386	SNC	4	TFBS,enhancer,openChrom,promoter	BATF,CCNT2,CHD2,CTCF,EBF1,ELF1,EP300,FOS,FOSL1,FOSL2,GTF2F1,HDAC1,HMGN3,JUN,JUNB,JUND,KDM5B,MAFF,MAFK,MAX,MAZ,MXI1,MYC,NFIC,PHF8,POLR2A,RAD21,RCOR1,REST,RFX5,RUNX3,SMC3,TAF1,TBP,TCF12,TCF7L2,TFAP2A,TFAP2C,UBTF,YY1,ZBTB33,ZNF143	.	.	.	.	Breast_variant_Human_Mammary_Epithelial_Cells_(vHMEC),Fetal_Adrenal_Gland,Fetal_Heart,Fetal_Intestine_Large,Fetal_Intestine_Small,Fetal_Kidney,Fetal_Lung,Fetal_Muscle_Leg,Fetal_Muscle_Trunk,Fetal_Stomach,Fetal_Thymus,Foreskin_Fibroblast_Primary_Cells_skin01,Foreskin_Fibroblast_Primary_Cells_skin02,Foreskin_Keratinocyte_Primary_Cells_skin02,Gastric,H1_Cells,H1_Derived_Mesenchymal_Stem_Cells,H1_Der…	ADRENAL,BLOOD,BRAIN,BREAST,ESC,GI_INTESTINE,GI_STOMACH,HEART,KIDNEY,LUNG,MUSCLE,MUSCLE_LEG,OVARY,PANCREAS,PLACENTA,SKIN,STROMAL_CONNECTIVE,THYMUS,iPSC	A549_EtOH_0.02pct_Lung_Carcinoma_Cell_Line,Adipose_Derived_Mesenchymal_Stem_Cell_Cultured_Cells,Adipose_Nuclei,Bone_Marrow_Derived_Cultured_Mesenchymal_Stem_Cells,Brain_Anterior_Caudate,Brain_Substantia_Nigra,Duodenum_Mucosa,Foreskin_Fibroblast_Primary_Cells_skin01,Foreskin_Fibroblast_Primary_Cells_skin02,Foreskin_Keratinocyte_Primary_Cells_skin02,Foreskin_Keratinocyte_Primary_Cells_skin03,GM1287…	BLOOD,BONE,BRAIN,BREAST,CERVIX,FAT,GI_DUODENUM,GI_RECTUM,GI_STOMACH,LIVER,LUNG,MUSCLE,SKIN,STROMAL_CONNECTIVE,STRONAL_CONNECTIVE,iPSC	A549_EtOH_0.02pct_Lung_Carcinoma_Cell_Line,Adipose_Nuclei,Aorta,Bone_Marrow_Derived_Cultured_Mesenchymal_Stem_Cells,Brain_Angular_Gyrus,Brain_Anterior_Caudate,Brain_Cingulate_Gyrus,Brain_Dorsolateral_Prefrontal_Cortex,Brain_Hippocampus_Middle,Brain_Substantia_Nigra,Colon_Smooth_Muscle,Colonic_Mucosa,Duodenum_Smooth_Muscle,Esophagus,Fetal_Adrenal_Gland,Fetal_Intestine_Small,Fetal_Muscle_Leg,Fetal_…	ADRENAL,BLOOD,BONE,BRAIN,BREAST,CERVIX,ESC,FAT,GI_COLON,GI_DUODENUM,GI_ESOPHAGUS,GI_INTESTINE,GI_RECTUM,GI_STOMACH,HEART,LIVER,LUNG,MUSCLE,MUSCLE_LEG,OVARY,PANCREAS,SKIN,SPLEEN,STROMAL_CONNECTIVE,STRONAL_CONNECTIVE,THYMUS,VASCULAR	.	.	.		.	A	G	G	G	G	G/G,G/G	.	0	-0.612	-0.648	-0.393	0.004	0.003	0.246	.	.	5.381	0.158681	.	SPDYC,SYVN1
chr11	65156480	65156481	SNC	4	TFBS,enhancer,openChrom,promoter	EBF1,RUNX3	.	.	.	.	Foreskin_Melanocyte_Primary_Cells_skin01	SKIN	A549_EtOH_0.02pct_Lung_Carcinoma_Cell_Line,Adipose_Derived_Mesenchymal_Stem_Cell_Cultured_Cells,Adipose_Nuclei,Bone_Marrow_Derived_Cultured_Mesenchymal_Stem_Cells,Brain_Angular_Gyrus,Brain_Anterior_Caudate,Brain_Hippocampus_Middle,Breast_Myoepithelial_Primary_Cells,Breast_variant_Human_Mammary_Epithelial_Cells_(vHMEC),Duodenum_Mucosa,Duodenum_Smooth_Muscle,Esophagus,Foreskin_Fibroblast_Primary_Ce…	BLOOD,BONE,BRAIN,BREAST,CERVIX,ENDODERM,ESC,FAT,GI_DUODENUM,GI_ESOPHAGUS,GI_RECTUM,GI_STOMACH,HEART,LUNG,MUSCLE,SKIN,STROMAL_CONNECTIVE,STRONAL_CONNECTIVE	Adipose_Nuclei,Bone_Marrow_Derived_Cultured_Mesenchymal_Stem_Cells,Brain_Anterior_Caudate,Brain_Cingulate_Gyrus,Brain_Dorsolateral_Prefrontal_Cortex,Brain_Hippocampus_Middle,Brain_Substantia_Nigra,Colonic_Mucosa,Esophagus,Foreskin_Fibroblast_Primary_Cells_skin01,Foreskin_Fibroblast_Primary_Cells_skin02,Foreskin_Keratinocyte_Primary_Cells_skin03,Foreskin_Melanocyte_Primary_Cells_skin03,GM12878_Lym…	BLOOD,BONE,BRAIN,CERVIX,ENDODERM,FAT,GI_COLON,GI_ESOPHAGUS,GI_INTESTINE,HEART,LUNG,PANCREAS,SKIN,SPLEEN,STROMAL_CONNECTIVE,STRONAL_CONNECTIVE,VASCULAR	.	.	.		.	T	C	C	C	C	C/C,C/C	.	0	0.002	-0.015	0.486	0	0	0.14	.	.	3.436	0.078958	.	FRMD8,SCYL1
chr11	65171154	65171155	SNP	4	TFBS,enhancer,openChrom,promoter	ELF1,GATA2,MAX,MYC,NRF1,POLR2A,RCOR1,RELA,RUNX3,SPI1,TAL1,TCF12,TEAD4,UBTF	.	.	.	.	Fetal_Lung,Primary_B_cells_from_peripheral_blood	BLOOD,LUNG	Foreskin_Fibroblast_Primary_Cells_skin01,Monocytes-CD14+_RO01746_Primary_Cells,Placenta_Amnion,Primary_hematopoietic_stem_cells_G-CSF-mobilized_Male,Primary_hematopoietic_stem_cells_short_term_culture,Primary_neutrophils_from_peripheral_blood	BLOOD,PLACENTA,SKIN	Adipose_Nuclei,Colon_Smooth_Muscle,Duodenum_Smooth_Muscle,Fetal_Intestine_Small,Fetal_Stomach,Fetal_Thymus,GM12878_Lymphoblastoid_Cells,K562_Leukemia_Cells,Left_Ventricle,Lung,Monocytes-CD14+_RO01746_Primary_Cells,Primary_B_cells_from_peripheral_blood,Primary_T_cells_from_peripheral_blood,Primary_T_helper_cells_from_peripheral_blood,Primary_hematopoietic_stem_cells_G-CSF-mobilized_Female,Primary_…	BLOOD,FAT,GI_COLON,GI_DUODENUM,GI_INTESTINE,GI_RECTUM,GI_STOMACH,HEART,LUNG,SPLEEN,THYMUS	.	.	.		.	T	C	C	C	NA	C/C,C/C	rs79979431	AF=0.0393371	-0.336	-0.373	-2.165	0	0	0.002	.	.	0.078	0.225121	4	FRMD8,SCYL1
chr11	65171209	65171210	SNC	4	TFBS,enhancer,openChrom,promoter	ELF1,GATA2,MAX,MYC,POLR2A,RCOR1,RELA,RUNX3,SPI1,TAL1,TEAD4,UBTF	.	.	.	.	Fetal_Adrenal_Gland,Fetal_Lung,Fetal_Muscle_Leg,Fetal_Muscle_Trunk,Fetal_Thymus,Primary_B_cells_from_peripheral_blood,Primary_Natural_Killer_cells_from_peripheral_blood,Primary_T_cells_from_cord_blood,Primary_hematopoietic_stem_cells_G-CSF-mobilized_Female,Primary_hematopoietic_stem_cells_G-CSF-mobilized_Male,Primary_monocytes_from_peripheral_blood	ADRENAL,BLOOD,LUNG,MUSCLE,MUSCLE_LEG,THYMUS	Foreskin_Fibroblast_Primary_Cells_skin01,Monocytes-CD14+_RO01746_Primary_Cells,Primary_hematopoietic_stem_cells_short_term_culture,Primary_neutrophils_from_peripheral_blood	BLOOD,SKIN	Adipose_Nuclei,Colon_Smooth_Muscle,Duodenum_Smooth_Muscle,Fetal_Thymus,GM12878_Lymphoblastoid_Cells,Left_Ventricle,Monocytes-CD14+_RO01746_Primary_Cells,Primary_B_cells_from_peripheral_blood,Primary_hematopoietic_stem_cells_G-CSF-mobilized_Female,Primary_monocytes_from_peripheral_blood,Sigmoid_Colon,Small_Intestine,Spleen,Stomach_Smooth_Muscle,Thymus	BLOOD,FAT,GI_COLON,GI_DUODENUM,GI_INTESTINE,GI_STOMACH,HEART,SPLEEN,THYMUS	.	.	.		.	G	C	C	C	NA	C/C,C/C	.	0	-0.327	-0.339	0.462	0	0	0.009	.	.	1.234	0.225121	.	FRMD8,SCYL1
chr11	65188706	65188707	SNC	4	TFBS,enhancer,motif_alter,promoter	BCL11A,BCLAF1,BHLHE40,BRCA1,CEBPB,CEBPD,CHD1,CHD2,E2F1,E2F4,EP300,ESR1,FOS,GABPA,GATA1,GATA2,GATA3,GTF2F1,HNF4A,JUN,JUNB,JUND,KDM5B,MAX,MAZ,MXI1,MYBL2,MYC,NR2F2,PAX5,POLR2A,RCOR1,RELA,REST,RFX5,RXRA,SIN3A,SIN3AK20,SMC3,SP1,STAT1,STAT2,STAT3,STAT5A,TAF1,TBL1XR1,TBP,TCF3,TCF7L2,USF1,USF2,ZBTB33,ZNF263	.	MOTIFBR=BRCA1,CEBPB,DHS,E2F1,EP300,ESR1,FOS,GTF2F1,HNF4A,JUNB,JUND,MYC,NFKB1,NR3C1,PAX5,SMC3,SP1,STAT3,TBP,TCF7L2,USF1,USF2#ETS_1#65188701#65188713#-#6#0.041667#0.208333	.	.	.	.	A549_EtOH_0.02pct_Lung_Carcinoma_Cell_Line,Bone_Marrow_Derived_Cultured_Mesenchymal_Stem_Cells,Brain_Angular_Gyrus,Brain_Anterior_Caudate,Brain_Germinal_Matrix,Brain_Hippocampus_Middle,Breast_Myoepithelial_Primary_Cells,Cortex_derived_primary_cultured_neurospheres,Dnd41_TCell_Leukemia_Cell_Line,Duodenum_Smooth_Muscle,Esophagus,Fetal_Brain_Female,Fetal_Intestine_Large,Fetal_Intestine_Small,Fetal_S…	BLOOD,BONE,BRAIN,BREAST,CERVIX,ENDODERM,GI_DUODENUM,GI_ESOPHAGUS,GI_INTESTINE,GI_RECTUM,GI_STOMACH,HEART,LIVER,LUNG,MUSCLE,SKIN,STRONAL_CONNECTIVE,THYMUS	A549_EtOH_0.02pct_Lung_Carcinoma_Cell_Line,Adipose_Nuclei,Aorta,Bone_Marrow_Derived_Cultured_Mesenchymal_Stem_Cells,Brain_Angular_Gyrus,Brain_Anterior_Caudate,Brain_Cingulate_Gyrus,Brain_Dorsolateral_Prefrontal_Cortex,Brain_Hippocampus_Middle,Brain_Inferior_Temporal_Lobe,Brain_Substantia_Nigra,Colon_Smooth_Muscle,Colonic_Mucosa,Dnd41_TCell_Leukemia_Cell_Line,Duodenum_Smooth_Muscle,Esophagus,Fetal…	ADRENAL,BLOOD,BONE,BRAIN,BREAST,CERVIX,ENDODERM,ESC,FAT,GI_COLON,GI_DUODENUM,GI_ESOPHAGUS,GI_INTESTINE,GI_RECTUM,GI_STOMACH,HEART,LIVER,LUNG,MUSCLE,MUSCLE_LEG,Mesendoderm,PANCREAS,PLACENTA,SKIN,SPLEEN,STROMAL_CONNECTIVE,STRONAL_CONNECTIVE,THYMUS,Trophoblast,VASCULAR	.	.	.		.	A	C	C	C	C	C/C,C/C	.	0	-0.412	-0.402	0.435	0	0	0.002	.	.	1.507	0.108992	.	FRMD8,SCYL1
chr11	65188950	65188951	SNC	4	TFBS,TFBS_motif,enhancer,openChrom	ARID3A,ATF1,ATF3,BATF,BCL11A,BCLAF1,BHLHE40,CEBPB,CHD1,CHD2,CTCF,E2F1,EBF1,EP300,ESR1,FOS,FOSL1,GATA1,GTF2F1,HDAC2,JUN,JUNB,JUND,MAX,MAZ,MXI1,MYBL2,MYC,NR2F2,NR3C1,PAX5,POLR2A,RAD21,RCOR1,RELA,REST,RFX5,RXRA,SIN3A,SIN3AK20,SP1,STAT1,STAT2,STAT3,STAT5A,TAF1,TBL1XR1,TBP,TCF12,TCF3,TCF7L2,USF1,USF2,ZBTB33,ZNF263	RFX5	.	.	.	Fetal_Brain_Female,Fetal_Brain_Male,Fetal_Lung,Fetal_Thymus,H1_BMP4_Derived_Mesendoderm_Cultured_Cells,H1_Derived_Neuronal_Progenitor_Cultured_Cells,Primary_B_cells_from_peripheral_blood,Primary_Natural_Killer_cells_from_peripheral_blood,Primary_T_cells_from_cord_blood,Primary_T_cells_from_peripheral_blood	BLOOD,BRAIN,LUNG,Mesendoderm,THYMUS	.	.	A549_EtOH_0.02pct_Lung_Carcinoma_Cell_Line,Adipose_Nuclei,Aorta,Bone_Marrow_Derived_Cultured_Mesenchymal_Stem_Cells,Brain_Angular_Gyrus,Brain_Anterior_Caudate,Brain_Cingulate_Gyrus,Brain_Dorsolateral_Prefrontal_Cortex,Brain_Hippocampus_Middle,Brain_Inferior_Temporal_Lobe,Brain_Substantia_Nigra,Colon_Smooth_Muscle,Colonic_Mucosa,Dnd41_TCell_Leukemia_Cell_Line,Duodenum_Smooth_Muscle,Esophagus,Fetal…	ADRENAL,BLOOD,BONE,BRAIN,BREAST,CERVIX,ENDODERM,ESC,FAT,GI_COLON,GI_DUODENUM,GI_ESOPHAGUS,GI_INTESTINE,GI_RECTUM,GI_STOMACH,HEART,LIVER,LUNG,MUSCLE,MUSCLE_LEG,Mesendoderm,OVARY,PANCREAS,PLACENTA,SKIN,SPLEEN,STROMAL_CONNECTIVE,STRONAL_CONNECTIVE,THYMUS,Trophoblast,VASCULAR,iPSC	.	.	.		.	T	C	C	C	C	C/C,C/C	.	0	-0.062	-0.062	0.441	0	0	0.001	.	.	1.875	0.108992	.	FRMD8,SCYL1
chr11	65192747	65192748	SNC	4	TFBS,enhancer,openChrom,promoter	BCL11A,BCL3,BCLAF1,CEBPB,CHD1,CHD2,CTCF,ELK4,EP300,ETS1,FOSL2,GTF2F1,JUND,MAX,MAZ,NFATC1,PAX5,PBX3,POLR2A,RAD21,RCOR1,RELA,SIN3AK20,SMC3,STAT1,STAT3,TAF1,TBP,USF1,WRNIP1,YY1	.	.	.	.	Fetal_Intestine_Small,Fetal_Lung,Fetal_Muscle_Leg,Fetal_Muscle_Trunk,Gastric,H1_Cells,Pancreas,Placenta,Primary_Natural_Killer_cells_from_peripheral_blood	BLOOD,ESC,GI_INTESTINE,GI_STOMACH,LUNG,MUSCLE,MUSCLE_LEG,PANCREAS,PLACENTA	A549_EtOH_0.02pct_Lung_Carcinoma_Cell_Line,Adipose_Derived_Mesenchymal_Stem_Cell_Cultured_Cells,Adipose_Nuclei,Aorta,Bone_Marrow_Derived_Cultured_Mesenchymal_Stem_Cells,Brain_Angular_Gyrus,Brain_Anterior_Caudate,Brain_Cingulate_Gyrus,Brain_Dorsolateral_Prefrontal_Cortex,Brain_Hippocampus_Middle,Brain_Inferior_Temporal_Lobe,Brain_Substantia_Nigra,Breast_Myoepithelial_Primary_Cells,Breast_variant_H…	ADRENAL,BLOOD,BONE,BRAIN,BREAST,CERVIX,ENDODERM,ESC,FAT,GI_COLON,GI_DUODENUM,GI_ESOPHAGUS,GI_INTESTINE,GI_RECTUM,GI_STOMACH,HEART,KIDNEY,LIVER,LUNG,MUSCLE,MUSCLE_LEG,Mesendoderm,OVARY,PANCREAS,PLACENTA,SKIN,SPLEEN,STROMAL_CONNECTIVE,STRONAL_CONNECTIVE,THYMUS,Trophoblast,VASCULAR,iPSC	A549_EtOH_0.02pct_Lung_Carcinoma_Cell_Line,Adipose_Nuclei,Aorta,Bone_Marrow_Derived_Cultured_Mesenchymal_Stem_Cells,Brain_Angular_Gyrus,Brain_Anterior_Caudate,Brain_Cingulate_Gyrus,Brain_Dorsolateral_Prefrontal_Cortex,Brain_Hippocampus_Middle,Brain_Inferior_Temporal_Lobe,Brain_Substantia_Nigra,Colon_Smooth_Muscle,Colonic_Mucosa,Dnd41_TCell_Leukemia_Cell_Line,Duodenum_Smooth_Muscle,Esophagus,Fetal…	ADRENAL,BLOOD,BONE,BRAIN,BREAST,CERVIX,ENDODERM,ESC,FAT,GI_COLON,GI_DUODENUM,GI_ESOPHAGUS,GI_INTESTINE,GI_RECTUM,GI_STOMACH,HEART,LIVER,LUNG,MUSCLE,MUSCLE_LEG,Mesendoderm,OVARY,PANCREAS,PLACENTA,SKIN,SPLEEN,STROMAL_CONNECTIVE,STRONAL_CONNECTIVE,THYMUS,Trophoblast,VASCULAR	.	.	.		.	G	A	A	A	A	A/A,A/A	.	0	0.254	0.238	0.235	0.013	0.011	0.018	.	.	5.403	0.255962	.	FRMD8,SCYL1
chr11	65198108	65198109	SNC	4	TFBS,enhancer,openChrom,promoter	CHD2,ELK4,POLR2A,SIN3A,SPI1,TCF7L2	.	.	.	.	Breast_variant_Human_Mammary_Epithelial_Cells_(vHMEC),Fetal_Stomach,H1_Derived_Mesenchymal_Stem_Cells,Ovary,Primary_B_cells_from_peripheral_blood,Primary_T_cells_from_cord_blood,Primary_T_cells_from_peripheral_blood,Small_Intestine	BLOOD,BREAST,GI_INTESTINE,GI_STOMACH,OVARY,STROMAL_CONNECTIVE	A549_EtOH_0.02pct_Lung_Carcinoma_Cell_Line,Adipose_Derived_Mesenchymal_Stem_Cell_Cultured_Cells,Adipose_Nuclei,Aorta,Bone_Marrow_Derived_Cultured_Mesenchymal_Stem_Cells,Brain_Angular_Gyrus,Brain_Anterior_Caudate,Brain_Cingulate_Gyrus,Brain_Dorsolateral_Prefrontal_Cortex,Brain_Hippocampus_Middle,Brain_Inferior_Temporal_Lobe,Brain_Substantia_Nigra,Breast_Myoepithelial_Primary_Cells,Colon_Smooth_Mus…	BLOOD,BONE,BRAIN,BREAST,CERVIX,ENDODERM,ESC,FAT,GI_COLON,GI_DUODENUM,GI_RECTUM,GI_STOMACH,HEART,LIVER,LUNG,MUSCLE,PANCREAS,PLACENTA,SKIN,STROMAL_CONNECTIVE,STRONAL_CONNECTIVE,THYMUS,VASCULAR	A549_EtOH_0.02pct_Lung_Carcinoma_Cell_Line,Adipose_Nuclei,Bone_Marrow_Derived_Cultured_Mesenchymal_Stem_Cells,Brain_Angular_Gyrus,Brain_Anterior_Caudate,Brain_Cingulate_Gyrus,Brain_Dorsolateral_Prefrontal_Cortex,Brain_Hippocampus_Middle,Brain_Inferior_Temporal_Lobe,Brain_Substantia_Nigra,Colon_Smooth_Muscle,Colonic_Mucosa,Dnd41_TCell_Leukemia_Cell_Line,Duodenum_Smooth_Muscle,Esophagus,Fetal_Intes…	BLOOD,BONE,BRAIN,BREAST,CERVIX,ENDODERM,ESC,FAT,GI_COLON,GI_DUODENUM,GI_ESOPHAGUS,GI_INTESTINE,GI_RECTUM,GI_STOMACH,HEART,LIVER,LUNG,MUSCLE,MUSCLE_LEG,PLACENTA,SKIN,SPLEEN,STROMAL_CONNECTIVE,STRONAL_CONNECTIVE,THYMUS,VASCULAR	.	.	.		.	C	T	T	T	T	T/T,T/T	.	0	0.634	0.572	0.457	0.001	0.001	0.013	.	.	6.977	0.12324	.	FRMD8,SCYL1
chr11	65200088	65200089	SNP	4	TFBS,eQTL,enhancer,promoter	POLR2A	.	.	Nerve_Tibial	.	.	.	Adipose_Derived_Mesenchymal_Stem_Cell_Cultured_Cells,Bone_Marrow_Derived_Cultured_Mesenchymal_Stem_Cells,Foreskin_Melanocyte_Primary_Cells_skin03,Mesenchymal_Stem_Cell_Derived_Adipocyte_Cultured_Cells,Mesenchymal_Stem_Cell_Derived_Chondrocyte_Cultured_Cells,Monocytes-CD14+_RO01746_Primary_Cells,Osteoblast_Primary_Cells,Primary_T_helper_cells_PMA-I_stimulated,Primary_hematopoietic_stem_cells_G-CSF…	BLOOD,BONE,FAT,SKIN,STROMAL_CONNECTIVE,STRONAL_CONNECTIVE	A549_EtOH_0.02pct_Lung_Carcinoma_Cell_Line,Adipose_Nuclei,Bone_Marrow_Derived_Cultured_Mesenchymal_Stem_Cells,Foreskin_Melanocyte_Primary_Cells_skin03,Mesenchymal_Stem_Cell_Derived_Chondrocyte_Cultured_Cells,NHDF-Ad_Adult_Dermal_Fibroblast_Primary_Cells,Osteoblast_Primary_Cells,Primary_T_helper_cells_PMA-I_stimulated,Primary_T_helper_cells_from_peripheral_blood,Primary_T_helper_memory_cells_from_…	BLOOD,BONE,FAT,LUNG,MUSCLE,SKIN,STROMAL_CONNECTIVE,STRONAL_CONNECTIVE	.	.	.		.	C	T	T	T	T	T/T,T/T	rs10737	AF=0.0315495	0.518	0.475	-0.383	0.002	0.001	0	.	.	5.81	0.110006	5	FRMD8,SCYL1
chr11	65201062	65201063	SNC	4	TFBS,enhancer,motif_alter,promoter	POLR2A	.	MOTIFG=NKX3-2_1#65201058#65201067#-#4#8.131#3.737	.	.	.	.	Adipose_Derived_Mesenchymal_Stem_Cell_Cultured_Cells,Bone_Marrow_Derived_Cultured_Mesenchymal_Stem_Cells,Foreskin_Melanocyte_Primary_Cells_skin01,Foreskin_Melanocyte_Primary_Cells_skin03,Mesenchymal_Stem_Cell_Derived_Adipocyte_Cultured_Cells,Mesenchymal_Stem_Cell_Derived_Chondrocyte_Cultured_Cells,Monocytes-CD14+_RO01746_Primary_Cells	BLOOD,FAT,SKIN,STROMAL_CONNECTIVE,STRONAL_CONNECTIVE	Adipose_Nuclei,Bone_Marrow_Derived_Cultured_Mesenchymal_Stem_Cells,Brain_Hippocampus_Middle,Brain_Inferior_Temporal_Lobe,Fetal_Adrenal_Gland,Foreskin_Melanocyte_Primary_Cells_skin03,Liver,Mesenchymal_Stem_Cell_Derived_Chondrocyte_Cultured_Cells,Osteoblast_Primary_Cells,Primary_T_cells_from_peripheral_blood,Primary_T_helper_cells_PMA-I_stimulated,Primary_T_regulatory_cells_from_peripheral_blood,Re…	ADRENAL,BLOOD,BONE,BRAIN,FAT,GI_RECTUM,LIVER,MUSCLE,SKIN,STROMAL_CONNECTIVE,STRONAL_CONNECTIVE	.	.	.		.	C	T	T	T	T	T/T,T/T	.	0	0.561	0.529	0.157	0.459	0.367	0.241	.	.	8.848	0.262962	.	FRMD8,SCYL1
chr11	65204473	65204474	SNP	4	TFBS,eQTL,enhancer,promoter	POLR2A	.	.	Nerve_Tibial	.	.	.	Adipose_Derived_Mesenchymal_Stem_Cell_Cultured_Cells,Bone_Marrow_Derived_Cultured_Mesenchymal_Stem_Cells,Foreskin_Melanocyte_Primary_Cells_skin01,Foreskin_Melanocyte_Primary_Cells_skin03,Mesenchymal_Stem_Cell_Derived_Adipocyte_Cultured_Cells,Mesenchymal_Stem_Cell_Derived_Chondrocyte_Cultured_Cells,Monocytes-CD14+_RO01746_Primary_Cells,Osteoblast_Primary_Cells	BLOOD,BONE,FAT,SKIN,STROMAL_CONNECTIVE,STRONAL_CONNECTIVE	Adipose_Nuclei,Bone_Marrow_Derived_Cultured_Mesenchymal_Stem_Cells,Brain_Anterior_Caudate,Brain_Hippocampus_Middle,Brain_Substantia_Nigra,Foreskin_Melanocyte_Primary_Cells_skin03,H1_Derived_Mesenchymal_Stem_Cells,Left_Ventricle,Liver,Mesenchymal_Stem_Cell_Derived_Chondrocyte_Cultured_Cells,Monocytes-CD14+_RO01746_Primary_Cells,NH-A_Astrocytes_Primary_Cells,NHDF-Ad_Adult_Dermal_Fibroblast_Primary_…	BLOOD,BRAIN,ENDODERM,FAT,GI_INTESTINE,GI_STOMACH,HEART,LIVER,MUSCLE,PLACENTA,SKIN,SPLEEN,STROMAL_CONNECTIVE,STRONAL_CONNECTIVE	.	.	.		.	T	C	C	C	T	C/C,C/C	rs75914785	AF=0.0329473	-0.627	-0.687	-0.374	0	0	0.005	.	.	1.254	0.298561	4	FRMD8,SCYL1
chr11	76777077	76777078	SNP	4	TFBS,enhancer,openChrom,promoter	GATA1,POLR2A	.	.	.	.	Fetal_Intestine_Small,Fetal_Kidney,Fetal_Muscle_Trunk,Fetal_Stomach,Foreskin_Fibroblast_Primary_Cells_skin01,Foreskin_Fibroblast_Primary_Cells_skin02,Foreskin_Melanocyte_Primary_Cells_skin01,Gastric,H1_Derived_Mesenchymal_Stem_Cells,H1_Derived_Neuronal_Progenitor_Cultured_Cells,IMR90_fetal_lung_fibroblasts_Cell_Line,Ovary,Primary_monocytes_from_peripheral_blood,Psoas_Muscle	BLOOD,BRAIN,GI_INTESTINE,GI_STOMACH,KIDNEY,LUNG,MUSCLE,OVARY,SKIN,STROMAL_CONNECTIVE	Adipose_Derived_Mesenchymal_Stem_Cell_Cultured_Cells,Adipose_Nuclei,Bone_Marrow_Derived_Cultured_Mesenchymal_Stem_Cells,Brain_Angular_Gyrus,Brain_Anterior_Caudate,Brain_Cingulate_Gyrus,Brain_Dorsolateral_Prefrontal_Cortex,Brain_Germinal_Matrix,Brain_Hippocampus_Middle,Brain_Inferior_Temporal_Lobe,Brain_Substantia_Nigra,Breast_Myoepithelial_Primary_Cells,Breast_variant_Human_Mammary_Epithelial_Cel…	ADRENAL,BLOOD,BONE,BRAIN,BREAST,ENDODERM,ESC,FAT,GI_COLON,GI_DUODENUM,GI_INTESTINE,GI_RECTUM,GI_STOMACH,HEART,KIDNEY,LIVER,LUNG,MUSCLE,MUSCLE_LEG,OVARY,PLACENTA,SKIN,STROMAL_CONNECTIVE,STRONAL_CONNECTIVE,THYMUS,iPSC	Adipose_Nuclei,Bone_Marrow_Derived_Cultured_Mesenchymal_Stem_Cells,Brain_Angular_Gyrus,Brain_Anterior_Caudate,Brain_Cingulate_Gyrus,Brain_Dorsolateral_Prefrontal_Cortex,Brain_Hippocampus_Middle,Brain_Inferior_Temporal_Lobe,Brain_Substantia_Nigra,Colon_Smooth_Muscle,Colonic_Mucosa,Duodenum_Smooth_Muscle,Esophagus,Fetal_Adrenal_Gland,Fetal_Intestine_Large,Fetal_Intestine_Small,Fetal_Muscle_Leg,Feta…	ADRENAL,BLOOD,BONE,BRAIN,FAT,GI_COLON,GI_DUODENUM,GI_ESOPHAGUS,GI_INTESTINE,GI_RECTUM,GI_STOMACH,HEART,LIVER,LUNG,MUSCLE,MUSCLE_LEG,OVARY,PANCREAS,PLACENTA,SKIN,SPLEEN,STROMAL_CONNECTIVE,STRONAL_CONNECTIVE	.	.	.		.	C	G	G	G	G	G/G,G/G	rs948966	AF=0.00499201	0.018	0.029	0.307	0	0	0.003	.	.	6.611	0.166803	4	CAPN5
chr11	102238236	102238237	SNP	4	TFBS,eQTL,enhancer,openChrom	CTCF,FOXA1,RAD21	.	.	Muscle_Skeletal	.	Fetal_Adrenal_Gland,Fetal_Brain_Female,Fetal_Brain_Male,Fetal_Heart,Fetal_Intestine_Large,Fetal_Intestine_Small,Fetal_Lung,Fetal_Stomach,Fetal_Thymus,Foreskin_Fibroblast_Primary_Cells_skin01,Foreskin_Keratinocyte_Primary_Cells_skin02,Foreskin_Melanocyte_Primary_Cells_skin01,IMR90_fetal_lung_fibroblasts_Cell_Line,Placenta,Primary_B_cells_from_peripheral_blood,Primary_T_cells_from_cord_blood,Primar…	ADRENAL,BLOOD,BRAIN,GI_INTESTINE,GI_STOMACH,HEART,LUNG,PLACENTA,SKIN,THYMUS	.	.	Brain_Inferior_Temporal_Lobe,Duodenum_Smooth_Muscle,Mesenchymal_Stem_Cell_Derived_Chondrocyte_Cultured_Cells,Primary_T_regulatory_cells_from_peripheral_blood	BLOOD,BRAIN,GI_DUODENUM,STROMAL_CONNECTIVE	.	.	.		.	G	A	A	A	A	A/A,A/A	rs10219215	AF=0.0373403	-0.641	-0.745	0.37	0	0	0.021	.	.	4.925	0.158681	4	BIRC2,TMEM123
chr11	102280750	102280751	SNP	4	TFBS,eQTL,enhancer,promoter	KAP1	.	.	Muscle_Skeletal	.	.	.	ES-WA7_Cells	ESC	Mesenchymal_Stem_Cell_Derived_Chondrocyte_Cultured_Cells,Primary_hematopoietic_stem_cells_G-CSF-mobilized_Female,hESC_Derived_CD56+_Mesoderm_Cultured_Cells	BLOOD,ENDODERM,STROMAL_CONNECTIVE	.	.	.		.	A	C	C	C	NA	C/C,C/C	rs11225247	AF=0.0615016	0.095	0.09	-0.25	0	0	0.005	.	.	0.525	0.088506	5	BIRC2,TMEM123
chr11	111598307	111598308	SNP	4	TFBS,enhancer,openChrom,promoter	EGR1	.	.	.	.	Psoas_Muscle	MUSCLE	Liver	LIVER	Adipose_Nuclei,Brain_Angular_Gyrus,Brain_Anterior_Caudate,Brain_Cingulate_Gyrus,Brain_Dorsolateral_Prefrontal_Cortex,Brain_Hippocampus_Middle,Brain_Inferior_Temporal_Lobe,Brain_Substantia_Nigra,Foreskin_Fibroblast_Primary_Cells_skin01,Foreskin_Melanocyte_Primary_Cells_skin01,Liver,Ovary	BRAIN,FAT,LIVER,OVARY,SKIN	.	.	.		.	A	G	G	G	G	G/G,G/G	rs61899391	AF=0.0115815	-0.845	-0.915	-1.095	0	0	0	.	.	1.033	0.162113	4	PPP2R1B,SIK2
chr11	111604058	111604059	SNP	4	TFBS,enhancer,openChrom,promoter	CEBPB,FOS,POLR2A,RAD21,STAT3	.	.	.	.	Fetal_Brain_Male,Fetal_Intestine_Small,Fetal_Kidney,Ovary	BRAIN,GI_INTESTINE,KIDNEY,OVARY	Brain_Anterior_Caudate,Brain_Inferior_Temporal_Lobe,Colon_Smooth_Muscle,HSMM_cell_derived_Skeletal_Muscle_Myotubes_Cells,Skeletal_Muscle_Female,Skeletal_Muscle_Male,Stomach_Smooth_Muscle	BRAIN,GI_COLON,GI_STOMACH,MUSCLE	A549_EtOH_0.02pct_Lung_Carcinoma_Cell_Line,Adipose_Nuclei,Aorta,Bone_Marrow_Derived_Cultured_Mesenchymal_Stem_Cells,Brain_Angular_Gyrus,Brain_Anterior_Caudate,Brain_Cingulate_Gyrus,Brain_Dorsolateral_Prefrontal_Cortex,Brain_Hippocampus_Middle,Brain_Inferior_Temporal_Lobe,Brain_Substantia_Nigra,Colon_Smooth_Muscle,Colonic_Mucosa,Duodenum_Smooth_Muscle,Fetal_Adrenal_Gland,Fetal_Intestine_Small,Feta…	ADRENAL,BLOOD,BONE,BRAIN,ENDODERM,ESC,FAT,GI_COLON,GI_DUODENUM,GI_INTESTINE,GI_RECTUM,GI_STOMACH,HEART,LIVER,LUNG,MUSCLE,MUSCLE_LEG,OVARY,PANCREAS,SKIN,SPLEEN,STROMAL_CONNECTIVE,STRONAL_CONNECTIVE,THYMUS,VASCULAR,iPSC	.	.	.		.	T	A	A	A	A	A/A,A/A	rs117496128	AF=0.00539137	-2.99	-3.223	0.53	0	0	0.014	.	.	4.989	0.114469	4	PPP2R1B,SIK2
chr11	111751361	111751362	SNP	4	TFBS,enhancer,openChrom,promoter	YY1	.	.	.	.	Fetal_Intestine_Large	GI_INTESTINE	K562_Leukemia_Cells	BLOOD	Foreskin_Fibroblast_Primary_Cells_skin02,HUES48_Cells,K562_Leukemia_Cells,Primary_T_CD8+_memory_cells_from_peripheral_blood	BLOOD,ESC,SKIN	.	.	.		.	T	C	C	C	C	C/C,C/C	rs182327052	AF=0.00459265	-0.667	-0.687	-0.674	0.003	0.002	0.002	.	.	0.432	0.093295	.	FDXACB1
chr11	119211774	119211775	SNP	4	TFBS,enhancer,openChrom,promoter	CTCF,EZH2,POLR2A	.	.	.	.	Primary_T_cells_from_peripheral_blood	BLOOD	Adipose_Derived_Mesenchymal_Stem_Cell_Cultured_Cells,Adipose_Nuclei,Bone_Marrow_Derived_Cultured_Mesenchymal_Stem_Cells,Brain_Angular_Gyrus,Brain_Anterior_Caudate,Brain_Cingulate_Gyrus,Brain_Dorsolateral_Prefrontal_Cortex,Brain_Hippocampus_Middle,Brain_Substantia_Nigra,Breast_Myoepithelial_Primary_Cells,Colon_Smooth_Muscle,Colonic_Mucosa,Cortex_derived_primary_cultured_neurospheres,Duodenum_Mucos…	ADRENAL,BLOOD,BONE,BRAIN,BREAST,ENDODERM,ESC,FAT,GI_COLON,GI_DUODENUM,GI_INTESTINE,GI_RECTUM,GI_STOMACH,HEART,KIDNEY,LIVER,LUNG,MUSCLE,PANCREAS,PLACENTA,SKIN,STROMAL_CONNECTIVE,STRONAL_CONNECTIVE,VASCULAR,iPSC	Adipose_Nuclei,Bone_Marrow_Derived_Cultured_Mesenchymal_Stem_Cells,Brain_Angular_Gyrus,Brain_Anterior_Caudate,Brain_Cingulate_Gyrus,Brain_Dorsolateral_Prefrontal_Cortex,Brain_Hippocampus_Middle,Brain_Inferior_Temporal_Lobe,Brain_Substantia_Nigra,Colonic_Mucosa,Duodenum_Smooth_Muscle,Esophagus,Fetal_Adrenal_Gland,Fetal_Intestine_Large,Fetal_Intestine_Small,Fetal_Muscle_Leg,Fetal_Muscle_Trunk,Fetal…	ADRENAL,BONE,BRAIN,FAT,GI_COLON,GI_DUODENUM,GI_ESOPHAGUS,GI_INTESTINE,GI_RECTUM,GI_STOMACH,HEART,LIVER,LUNG,MUSCLE,MUSCLE_LEG,PANCREAS,PLACENTA,SKIN,SPLEEN,STROMAL_CONNECTIVE,STRONAL_CONNECTIVE,VASCULAR	.	.	.		.	A	G	G	G	G	G/G,G/G	rs147285871	AF=0.00479233	-0.028	-0.233	-2.485	0	0	0	.	.	3.064	0.11394	.	MFRP,RNF26
chr12	65003316	65003317	SNP	4	enhancer,motif_alter,openChrom,promoter	.	.	MOTIFG=SOX17_1#65003314#65003320#-#3#7.618#3.223,SOX5_2#65003314#65003321#-#4#8.195#3.844	.	.	Fetal_Heart,Fetal_Intestine_Small,H1_Derived_Neuronal_Progenitor_Cultured_Cells,Placenta,Primary_B_cells_from_peripheral_blood,iPS_DF_6.9_Cells	BLOOD,BRAIN,GI_INTESTINE,HEART,PLACENTA,iPSC	A549_EtOH_0.02pct_Lung_Carcinoma_Cell_Line,Adipose_Derived_Mesenchymal_Stem_Cell_Cultured_Cells,Adipose_Nuclei,Aorta,Bone_Marrow_Derived_Cultured_Mesenchymal_Stem_Cells,Brain_Angular_Gyrus,Brain_Anterior_Caudate,Brain_Cingulate_Gyrus,Brain_Dorsolateral_Prefrontal_Cortex,Brain_Hippocampus_Middle,Brain_Inferior_Temporal_Lobe,Brain_Substantia_Nigra,Breast_Myoepithelial_Primary_Cells,Breast_variant_H…	ADRENAL,BLOOD,BONE,BRAIN,BREAST,CERVIX,ENDODERM,ESC,FAT,GI_COLON,GI_DUODENUM,GI_INTESTINE,GI_RECTUM,GI_STOMACH,HEART,KIDNEY,LIVER,LUNG,MUSCLE,MUSCLE_LEG,Mesendoderm,PANCREAS,PLACENTA,SKIN,STROMAL_CONNECTIVE,STRONAL_CONNECTIVE,THYMUS,VASCULAR,iPSC	A549_EtOH_0.02pct_Lung_Carcinoma_Cell_Line,Adipose_Nuclei,Brain_Angular_Gyrus,Brain_Anterior_Caudate,Brain_Cingulate_Gyrus,Brain_Hippocampus_Middle,Brain_Inferior_Temporal_Lobe,Colon_Smooth_Muscle,Colonic_Mucosa,Duodenum_Smooth_Muscle,Esophagus,Fetal_Adrenal_Gland,Fetal_Intestine_Large,Fetal_Intestine_Small,Fetal_Muscle_Leg,Fetal_Muscle_Trunk,Fetal_Stomach,Fetal_Thymus,Foreskin_Fibroblast_Primary…	ADRENAL,BLOOD,BONE,BRAIN,BREAST,CERVIX,ENDODERM,ESC,FAT,GI_COLON,GI_DUODENUM,GI_ESOPHAGUS,GI_INTESTINE,GI_RECTUM,GI_STOMACH,HEART,LIVER,LUNG,MUSCLE,MUSCLE_LEG,Mesendoderm,PLACENTA,SKIN,SPLEEN,STROMAL_CONNECTIVE,THYMUS,Trophoblast,VASCULAR,iPSC	.	.	.		.	T	G	G	G	G	G/G,G/G	rs7314226	AF=0.00459265	-0.472	-0.463	-1.096	0	0	0.001	.	.	3.539	0	5	RASSF3
chr12	65003720	65003721	SNP	4	TFBS,enhancer,openChrom,promoter	GATA1,GATA2,GATA3,KDM5B,PAX5,PML,POLR2A,RELA,RUNX3,SIN3A,ZBTB7A	.	.	.	.	Fetal_Intestine_Small,Fetal_Muscle_Leg,Fetal_Stomach,H1_Cells,H1_Derived_Neuronal_Progenitor_Cultured_Cells,Primary_Natural_Killer_cells_from_peripheral_blood	BLOOD,BRAIN,ESC,GI_INTESTINE,GI_STOMACH,MUSCLE_LEG	A549_EtOH_0.02pct_Lung_Carcinoma_Cell_Line,Adipose_Derived_Mesenchymal_Stem_Cell_Cultured_Cells,Adipose_Nuclei,Aorta,Bone_Marrow_Derived_Cultured_Mesenchymal_Stem_Cells,Brain_Angular_Gyrus,Brain_Anterior_Caudate,Brain_Cingulate_Gyrus,Brain_Dorsolateral_Prefrontal_Cortex,Brain_Germinal_Matrix,Brain_Hippocampus_Middle,Brain_Inferior_Temporal_Lobe,Brain_Substantia_Nigra,Breast_Myoepithelial_Primary_…	ADRENAL,BLOOD,BONE,BRAIN,BREAST,CERVIX,ENDODERM,ESC,FAT,GI_COLON,GI_DUODENUM,GI_ESOPHAGUS,GI_INTESTINE,GI_RECTUM,GI_STOMACH,HEART,KIDNEY,LIVER,LUNG,MUSCLE,MUSCLE_LEG,Mesendoderm,OVARY,PANCREAS,PLACENTA,SKIN,SPLEEN,STROMAL_CONNECTIVE,STRONAL_CONNECTIVE,THYMUS,Trophoblast,VASCULAR,iPSC	A549_EtOH_0.02pct_Lung_Carcinoma_Cell_Line,Adipose_Nuclei,Aorta,Bone_Marrow_Derived_Cultured_Mesenchymal_Stem_Cells,Brain_Angular_Gyrus,Brain_Anterior_Caudate,Brain_Cingulate_Gyrus,Brain_Dorsolateral_Prefrontal_Cortex,Brain_Hippocampus_Middle,Brain_Inferior_Temporal_Lobe,Brain_Substantia_Nigra,Colon_Smooth_Muscle,Colonic_Mucosa,Dnd41_TCell_Leukemia_Cell_Line,Duodenum_Smooth_Muscle,Esophagus,Fetal…	ADRENAL,BLOOD,BONE,BRAIN,BREAST,CERVIX,ENDODERM,ESC,FAT,GI_COLON,GI_DUODENUM,GI_ESOPHAGUS,GI_INTESTINE,GI_RECTUM,GI_STOMACH,HEART,LIVER,LUNG,MUSCLE,MUSCLE_LEG,Mesendoderm,PANCREAS,PLACENTA,SKIN,SPLEEN,STROMAL_CONNECTIVE,STRONAL_CONNECTIVE,THYMUS,Trophoblast,VASCULAR,iPSC	.	.	.		.	T	G	G	G	G	G/G,G/G	rs78566754	AF=0.00459265	2.024	2.046	0.501	0.001	0.001	0.003	.	.	6.199	0.046548	4	RASSF3
chr12	68685350	68685351	SNC	4	TFBS,enhancer,openChrom,promoter	FOS,JUND,MYC	.	.	.	.	Breast_variant_Human_Mammary_Epithelial_Cells_(vHMEC),Foreskin_Keratinocyte_Primary_Cells_skin02	BREAST,SKIN	Primary_T_helper_17_cells_PMA-I_stimulated	BLOOD	Brain_Inferior_Temporal_Lobe,Foreskin_Keratinocyte_Primary_Cells_skin03,NHEK-Epidermal_Keratinocyte_Primary_Cells,Primary_T_helper_17_cells_PMA-I_stimulated,Primary_T_helper_cells_PMA-I_stimulated	BLOOD,BRAIN,SKIN	.	.	.		.	C	T	T	T	T	T/T,T/T	.	0	-1.33	-1.474	-0.455	0	0	0	.	.	2.824	0.074388	.	IL22,MDM1
chr12	68728191	68728192	SNC	4	TFBS,enhancer,openChrom,promoter	CTCF,GATA1,MAX,MYC,RAD21,SMC3	.	.	.	.	Fetal_Brain_Female,Fetal_Kidney,Fetal_Muscle_Trunk,Fetal_Stomach,Foreskin_Fibroblast_Primary_Cells_skin01,H9_Cells,Primary_B_cells_from_peripheral_blood,Psoas_Muscle,iPS_DF_19.11_Cells	BLOOD,BRAIN,ESC,GI_STOMACH,KIDNEY,MUSCLE,SKIN,iPSC	Primary_T_CD8+_memory_cells_from_peripheral_blood,Primary_T_helper_cells_from_peripheral_blood,Primary_hematopoietic_stem_cells_G-CSF-mobilized_Male	BLOOD	Foreskin_Fibroblast_Primary_Cells_skin01,H9_Cells,Primary_Natural_Killer_cells_from_peripheral_blood,Primary_T_cells_from_peripheral_blood,Primary_T_helper_naive_cells_from_peripheral_blood,Primary_hematopoietic_stem_cells_G-CSF-mobilized_Female,Rectal_Smooth_Muscle,Stomach_Smooth_Muscle	BLOOD,ESC,GI_RECTUM,GI_STOMACH,SKIN	.	.	.		.	T	C	C	C	C	C/C,C/C	.	0	1	1.009	0.545	0.001	0.001	0.374	.	.	7.931	0.095506	.	MDM1
chr12	108493906	108493907	SNP	4	DE_gene,TFBS,TFBS_motif,motif_alter	JUN,JUNB,JUND,MAFF,RCOR1	v-Maf	MOTIFBR=JUNB,JUND#NRL_1#108493900#108493911#-#4#0.238120#0.306722,JUNB,JUND#MAF_known6#108493900#108493912#-#5#0.161981#0.329776,JUNB,JUND#MAF_known8#108493900#108493912#-#5#0.094351#0.371655	.	.	.	.	.	.	.	.	.	.	WSCD2	testis	.	A	G	G	G	G	G/G,G/G	rs75087836	AF=0.0714856	-0.293	-0.317	-0.13	0	0	0	.	.	1.642	0.053691	4	ASCL4,WSCD2
chr13	52422977	52422978	SNC	4	TFBS,enhancer,motif_alter,openChrom	CEBPB,EP300,FOS,FOXA1,JUN,PRDM1,STAT3	.	MOTIFBR=DHS,EP300,FOS,FOXA1,PRDM1,STAT3#NFIC_1#52422976#52423005#+#3#0.000000#0.375000	.	.	Foreskin_Keratinocyte_Primary_Cells_skin02,H1_Derived_Mesenchymal_Stem_Cells,IMR90_fetal_lung_fibroblasts_Cell_Line	LUNG,SKIN,STROMAL_CONNECTIVE	.	.	hESC_Derived_CD56+_Mesoderm_Cultured_Cells	ENDODERM	.	.	.		.	G	A	A	A	A	A/A,A/A	.	0	-0.255	-0.267	-1.003	0	0	0.001	.	.	1.383	0.119485	.	CCDC70,DHRS12
chr13	61034073	61034074	SNP	4	DE_gene,eQTL,enhancer,openChrom	.	.	.	Lung	.	Small_Intestine	GI_INTESTINE	.	.	H1_BMP4_Derived_Mesendoderm_Cultured_Cells	Mesendoderm	.	.	TDRD3	testis	.	T	C	C	C	C	C/C,C/C	rs147257336	AF=0.0233626	-0.038	-0.037	-0.194	0	0	0.009	.	.	2.051	0.106106	.	PCDH20,TDRD3
chr13	67198654	67198655	SNP	4	TFBS,enhancer,openChrom,promoter	KAP1	.	.	.	.	Foreskin_Melanocyte_Primary_Cells_skin01	SKIN	Skeletal_Muscle_Male	MUSCLE	Foreskin_Fibroblast_Primary_Cells_skin01	SKIN	.	.	.		.	G	A	A	A	A	A/A,A/A	rs112582169	AF=0.0285543	0.052	0.013	0.473	0	0	0.002	.	.	2.083	0.053691	4	PCDH9
chr13	110676526	110676527	SNP	4	TFBS,enhancer,openChrom,promoter	EBF1	.	.	.	.	Foreskin_Fibroblast_Primary_Cells_skin01,Foreskin_Fibroblast_Primary_Cells_skin02,H1_Derived_Mesenchymal_Stem_Cells,IMR90_fetal_lung_fibroblasts_Cell_Line,Ovary,Pancreas	LUNG,OVARY,PANCREAS,SKIN,STROMAL_CONNECTIVE	Stomach_Smooth_Muscle	GI_STOMACH	Brain_Hippocampus_Middle,Fetal_Adrenal_Gland,Fetal_Stomach,Foreskin_Melanocyte_Primary_Cells_skin03,Mesenchymal_Stem_Cell_Derived_Chondrocyte_Cultured_Cells,Osteoblast_Primary_Cells,Rectal_Smooth_Muscle,Stomach_Smooth_Muscle	ADRENAL,BONE,BRAIN,GI_RECTUM,GI_STOMACH,SKIN,STROMAL_CONNECTIVE	.	.	.		.	A	G	G	G	G	G/G,G/G	rs74533944	AF=0.0251597	1.095	1.17	0.651	0.998	0.053	0.037	264.8	1.59526e-41	4.839	0.053691	4	COL4A1,IRS2
chr14	53402676	53402677	SNP	4	enhancer,motif_alter,openChrom,promoter	.	.	MOTIFG=BRCA1_known1#53402677#53402685#-#8#7.095#4.514	.	.	Fetal_Lung,Ovary	LUNG,OVARY	Adipose_Derived_Mesenchymal_Stem_Cell_Cultured_Cells,Aorta,Duodenum_Smooth_Muscle,Liver,Ovary,Stomach_Smooth_Muscle	GI_DUODENUM,GI_STOMACH,LIVER,OVARY,STRONAL_CONNECTIVE,VASCULAR	Adipose_Nuclei,Foreskin_Fibroblast_Primary_Cells_skin02,H1_BMP4_Derived_Mesendoderm_Cultured_Cells,Liver,Mesenchymal_Stem_Cell_Derived_Chondrocyte_Cultured_Cells	FAT,LIVER,Mesendoderm,SKIN,STROMAL_CONNECTIVE	.	.	.		.	T	C	C	C	C	C/C,C/C	rs17093030	AF=0.0435304	1.974	1.995	0.651	0.004	0.004	0.044	.	.	4.757	0.084033	5	FERMT2,GNPNAT1
chr14	53402700	53402701	SNP	4	enhancer,motif_alter,openChrom,promoter	.	.	MOTIFBR=DHS#HNF1_3#53402687#53402705#-#4#0.000000#0.941176,DHS#HNF1_1#53402689#53402704#-#3#0.000000#0.961538,DHS#HNF1A_4#53402689#53402704#-#3#0.054767#0.858140,DHS#HNF1B_4#53402689#53402704#-#3#0.045652#0.861344,DHS#HNF1B_3#53402690#53402703#+#12#0.042424#0.888810,DHS#DBX1_1#53402692#53402709#-#8#0.073668#0.717033	.	.	Fetal_Kidney,Fetal_Lung,Ovary	KIDNEY,LUNG,OVARY	Adipose_Derived_Mesenchymal_Stem_Cell_Cultured_Cells,Aorta,Duodenum_Smooth_Muscle,Liver,Ovary,Stomach_Smooth_Muscle	GI_DUODENUM,GI_STOMACH,LIVER,OVARY,STRONAL_CONNECTIVE,VASCULAR	Adipose_Nuclei,Foreskin_Fibroblast_Primary_Cells_skin02,H1_BMP4_Derived_Mesendoderm_Cultured_Cells,Liver,Mesenchymal_Stem_Cell_Derived_Chondrocyte_Cultured_Cells	FAT,LIVER,Mesendoderm,SKIN,STROMAL_CONNECTIVE	.	.	.		.	A	C	C	C	C	C/C,C/C	rs17093032	AF=0.04373	0.826	0.843	-0.144	0.131	0.091	0.614	.	.	11.47	0.084033	5	FERMT2,GNPNAT1
chr14	53417157	53417158	SNP	4	TFBS,enhancer,openChrom,promoter	CTBP2,MAX,MXI1,MYC,POLR2A,RBBP5,REST,SIN3AK20,SP4,STAT1,STAT3,TAF1,USF1,USF2,YY1	.	.	.	.	Fetal_Heart,Fetal_Thymus,H1_BMP4_Derived_Trophoblast_Cultured_Cells,H1_Derived_Neuronal_Progenitor_Cultured_Cells,Ovary,Pancreas,Primary_hematopoietic_stem_cells_G-CSF-mobilized_Male,Primary_monocytes_from_peripheral_blood,Psoas_Muscle,iPS_DF_6.9_Cells	BLOOD,BRAIN,HEART,MUSCLE,OVARY,PANCREAS,THYMUS,Trophoblast,iPSC	A549_EtOH_0.02pct_Lung_Carcinoma_Cell_Line,Adipose_Derived_Mesenchymal_Stem_Cell_Cultured_Cells,Adipose_Nuclei,Aorta,Bone_Marrow_Derived_Cultured_Mesenchymal_Stem_Cells,Brain_Angular_Gyrus,Brain_Anterior_Caudate,Brain_Cingulate_Gyrus,Brain_Dorsolateral_Prefrontal_Cortex,Brain_Germinal_Matrix,Brain_Hippocampus_Middle,Brain_Inferior_Temporal_Lobe,Brain_Substantia_Nigra,Breast_Myoepithelial_Primary_…	ADRENAL,BLOOD,BONE,BRAIN,BREAST,CERVIX,ENDODERM,ESC,FAT,GI_COLON,GI_DUODENUM,GI_ESOPHAGUS,GI_INTESTINE,GI_RECTUM,GI_STOMACH,HEART,KIDNEY,LIVER,LUNG,MUSCLE,MUSCLE_LEG,Mesendoderm,OVARY,PANCREAS,PLACENTA,SKIN,SPLEEN,STROMAL_CONNECTIVE,STRONAL_CONNECTIVE,THYMUS,Trophoblast,VASCULAR,iPSC	A549_EtOH_0.02pct_Lung_Carcinoma_Cell_Line,Adipose_Nuclei,Aorta,Bone_Marrow_Derived_Cultured_Mesenchymal_Stem_Cells,Brain_Angular_Gyrus,Brain_Anterior_Caudate,Brain_Cingulate_Gyrus,Brain_Dorsolateral_Prefrontal_Cortex,Brain_Hippocampus_Middle,Brain_Inferior_Temporal_Lobe,Brain_Substantia_Nigra,Colon_Smooth_Muscle,Colonic_Mucosa,Dnd41_TCell_Leukemia_Cell_Line,Duodenum_Smooth_Muscle,Esophagus,Fetal…	ADRENAL,BLOOD,BONE,BRAIN,BREAST,CERVIX,ENDODERM,ESC,FAT,GI_COLON,GI_DUODENUM,GI_ESOPHAGUS,GI_INTESTINE,GI_RECTUM,GI_STOMACH,HEART,LIVER,LUNG,MUSCLE,MUSCLE_LEG,Mesendoderm,OVARY,PANCREAS,PLACENTA,SKIN,SPLEEN,STROMAL_CONNECTIVE,STRONAL_CONNECTIVE,THYMUS,Trophoblast,VASCULAR,iPSC	.	.	.		.	G	C	C	C	C	C/C,C/C	rs61741989	AF=0.0433307	0.375	0.341	0.457	0.998	0.999	0.882	773.4	2.56132e-128	13.27	0.652421	4	FERMT2
chr14	71789746	71789747	SNP	4	TFBS,TFBS_motif,enhancer,openChrom,promoter	CTCF,MYC,POLR2A,RCOR1	GFI1	.	.	.	Fetal_Thymus,Primary_B_cells_from_peripheral_blood	BLOOD,THYMUS	Adipose_Derived_Mesenchymal_Stem_Cell_Cultured_Cells,Adipose_Nuclei,Bone_Marrow_Derived_Cultured_Mesenchymal_Stem_Cells,Brain_Angular_Gyrus,Brain_Anterior_Caudate,Brain_Dorsolateral_Prefrontal_Cortex,Brain_Hippocampus_Middle,Brain_Inferior_Temporal_Lobe,Breast_Myoepithelial_Primary_Cells,Breast_variant_Human_Mammary_Epithelial_Cells_(vHMEC),Cortex_derived_primary_cultured_neurospheres,Dnd41_TCell…	BLOOD,BONE,BRAIN,BREAST,CERVIX,ENDODERM,ESC,FAT,GI_DUODENUM,HEART,KIDNEY,LUNG,MUSCLE,SKIN,STROMAL_CONNECTIVE,STRONAL_CONNECTIVE,iPSC	Adipose_Nuclei,Bone_Marrow_Derived_Cultured_Mesenchymal_Stem_Cells,Brain_Anterior_Caudate,Brain_Hippocampus_Middle,Brain_Inferior_Temporal_Lobe,Colonic_Mucosa,Esophagus,Fetal_Adrenal_Gland,Foreskin_Keratinocyte_Primary_Cells_skin03,GM12878_Lymphoblastoid_Cells,H1_Cells,HMEC_Mammary_Epithelial_Primary_Cells,HSMM_Skeletal_Muscle_Myoblasts_Cells,HSMM_cell_derived_Skeletal_Muscle_Myotubes_Cells,IMR90…	ADRENAL,BLOOD,BONE,BRAIN,BREAST,ESC,FAT,GI_COLON,GI_ESOPHAGUS,LIVER,LUNG,MUSCLE,SKIN,STROMAL_CONNECTIVE,STRONAL_CONNECTIVE	.	.	.		.	C	T	T	T	T	T/T,T/T	rs79942796	AF=0.0599042	-0.39	-0.139	0.525	0	0	0.001	.	.	8.039	0.110573	5	PCNX,SIPA1L1
chr14	71999381	71999382	SNP	4	TFBS,enhancer,openChrom,promoter	EP300,RAD21	.	.	.	.	Pancreas,Psoas_Muscle	MUSCLE,PANCREAS	Bone_Marrow_Derived_Cultured_Mesenchymal_Stem_Cells,Brain_Anterior_Caudate,NH-A_Astrocytes_Primary_Cells	BRAIN,STRONAL_CONNECTIVE	Bone_Marrow_Derived_Cultured_Mesenchymal_Stem_Cells,Brain_Angular_Gyrus,Brain_Anterior_Caudate,Brain_Cingulate_Gyrus,Brain_Inferior_Temporal_Lobe,HSMM_cell_derived_Skeletal_Muscle_Myotubes_Cells,Mesenchymal_Stem_Cell_Derived_Chondrocyte_Cultured_Cells,NH-A_Astrocytes_Primary_Cells,Osteoblast_Primary_Cells	BONE,BRAIN,MUSCLE,STROMAL_CONNECTIVE,STRONAL_CONNECTIVE	.	.	.		.	C	T	T	T	T	T/T,T/T	rs149659289	AF=0.000998403	0.229	0.458	0.53	0	0	0.006	.	.	6.038	0.071141	.	RGS6,SIPA1L1
chr14	72117915	72117916	SNP	4	TFBS,enhancer,motif_alter,promoter	FOS,GATA2	.	MOTIFBR=FOS,GATA2#FOXD1_1#72117913#72117929#-#13#0.200000#0.350000	.	.	.	.	Brain_Hippocampus_Middle,Ganglion_Eminence_derived_primary_cultured_neurospheres	BRAIN	Adipose_Nuclei,Bone_Marrow_Derived_Cultured_Mesenchymal_Stem_Cells,Brain_Angular_Gyrus,Brain_Anterior_Caudate,Brain_Cingulate_Gyrus,Brain_Dorsolateral_Prefrontal_Cortex,Brain_Hippocampus_Middle,Brain_Inferior_Temporal_Lobe,Colonic_Mucosa,Duodenum_Smooth_Muscle,Fetal_Adrenal_Gland,Fetal_Muscle_Leg,Fetal_Thymus,HMEC_Mammary_Epithelial_Primary_Cells,HSMM_Skeletal_Muscle_Myoblasts_Cells,HSMM_cell_der…	ADRENAL,BONE,BRAIN,BREAST,FAT,GI_COLON,GI_DUODENUM,LUNG,MUSCLE,MUSCLE_LEG,SKIN,STROMAL_CONNECTIVE,STRONAL_CONNECTIVE,THYMUS,VASCULAR	.	.	.		.	T	C	C	C	T	C/C,C/C	rs118108498	AF=0.00179712	0.126	0.057	-0.286	0	0	0.014	.	.	1.461	0.108992	5	RGS6,SIPA1L1
chr14	72126072	72126073	SNP	4	TFBS,enhancer,openChrom,promoter	BRCA1,CEBPB,EP300,FOS,FOSL2,FOXA1,GATA2,GATA3,JUN,JUND,NFYB,POLR2A,RAD21,RCOR1,SPI1,STAT3,TCF12,TCF7L2	.	.	.	.	Breast_variant_Human_Mammary_Epithelial_Cells_(vHMEC),H1_Derived_Mesenchymal_Stem_Cells	BREAST,STROMAL_CONNECTIVE	Bone_Marrow_Derived_Cultured_Mesenchymal_Stem_Cells,HUVEC_Umbilical_Vein_Endothelial_Primary_Cells,Muscle_Satellite_Cultured_Cells	MUSCLE,STRONAL_CONNECTIVE,VASCULAR	Bone_Marrow_Derived_Cultured_Mesenchymal_Stem_Cells,Brain_Angular_Gyrus,Brain_Substantia_Nigra,Dnd41_TCell_Leukemia_Cell_Line,Fetal_Adrenal_Gland,HSMM_Skeletal_Muscle_Myoblasts_Cells,HSMM_cell_derived_Skeletal_Muscle_Myotubes_Cells,HUES48_Cells,HUES64_Cells,HUES6_Cells,HUVEC_Umbilical_Vein_Endothelial_Primary_Cells,Mesenchymal_Stem_Cell_Derived_Chondrocyte_Cultured_Cells,NH-A_Astrocytes_Primary_C…	ADRENAL,BLOOD,BONE,BRAIN,ESC,MUSCLE,SKIN,STROMAL_CONNECTIVE,STRONAL_CONNECTIVE,VASCULAR,iPSC	.	.	.		.	G	C	C	C	C	C/C,C/C	rs117601706	AF=0.000998403	0.34	0.575	-0.307	0.003	0.005	0.035	193.7	3.04873e-16	1.061	0.235255	4	RGS6,SIPA1L1
chr14	72153638	72153639	SNP	4	TFBS,enhancer,openChrom,promoter	EP300,STAT3	.	.	.	.	Fetal_Brain_Male,Fetal_Heart,Fetal_Kidney,Foreskin_Fibroblast_Primary_Cells_skin02,H1_BMP4_Derived_Trophoblast_Cultured_Cells,H1_Derived_Mesenchymal_Stem_Cells,IMR90_fetal_lung_fibroblasts_Cell_Line,Ovary,Psoas_Muscle	BRAIN,HEART,KIDNEY,LUNG,MUSCLE,OVARY,SKIN,STROMAL_CONNECTIVE,Trophoblast	Bone_Marrow_Derived_Cultured_Mesenchymal_Stem_Cells	STRONAL_CONNECTIVE	Aorta,Bone_Marrow_Derived_Cultured_Mesenchymal_Stem_Cells,Brain_Dorsolateral_Prefrontal_Cortex,Brain_Hippocampus_Middle,Colon_Smooth_Muscle,Esophagus,Fetal_Adrenal_Gland,Fetal_Muscle_Leg,Fetal_Stomach,Foreskin_Fibroblast_Primary_Cells_skin01,H1_BMP4_Derived_Trophoblast_Cultured_Cells,HSMM_Skeletal_Muscle_Myoblasts_Cells,HSMM_cell_derived_Skeletal_Muscle_Myotubes_Cells,IMR90_fetal_lung_fibroblasts…	ADRENAL,BONE,BRAIN,GI_COLON,GI_ESOPHAGUS,GI_INTESTINE,GI_RECTUM,GI_STOMACH,HEART,LUNG,MUSCLE,MUSCLE_LEG,OVARY,SKIN,SPLEEN,STROMAL_CONNECTIVE,STRONAL_CONNECTIVE,Trophoblast,VASCULAR	.	.	.		.	G	A	A	A	A	A/A,A/A	rs141375363	AF=0.000998403	-0.11	-0.127	-0.373	0.001	0	0.005	.	.	3.213	0.099367	.	RGS6,SIPA1L1
chr14	102431672	102431673	SNP	4	TFBS,enhancer,openChrom,promoter	CCNT2,MAX,MYC,POLR2A,REST,SIN3A,SIN3AK20,TAF1,USF1,USF2,YY1	.	.	.	.	Breast_variant_Human_Mammary_Epithelial_Cells_(vHMEC),Fetal_Adrenal_Gland,Fetal_Brain_Female,Fetal_Brain_Male,Fetal_Heart,Fetal_Intestine_Large,Fetal_Intestine_Small,Fetal_Kidney,Fetal_Lung,Fetal_Muscle_Leg,Fetal_Muscle_Trunk,Fetal_Stomach,Fetal_Thymus,Foreskin_Fibroblast_Primary_Cells_skin01,Foreskin_Fibroblast_Primary_Cells_skin02,Foreskin_Keratinocyte_Primary_Cells_skin02,Foreskin_Melanocyte_P…	ADRENAL,BLOOD,BRAIN,BREAST,ESC,GI_INTESTINE,GI_STOMACH,HEART,KIDNEY,LUNG,MUSCLE,MUSCLE_LEG,Mesendoderm,OVARY,PANCREAS,PLACENTA,SKIN,STROMAL_CONNECTIVE,THYMUS,iPSC	A549_EtOH_0.02pct_Lung_Carcinoma_Cell_Line,Adipose_Derived_Mesenchymal_Stem_Cell_Cultured_Cells,Adipose_Nuclei,Aorta,Bone_Marrow_Derived_Cultured_Mesenchymal_Stem_Cells,Brain_Angular_Gyrus,Brain_Anterior_Caudate,Brain_Cingulate_Gyrus,Brain_Dorsolateral_Prefrontal_Cortex,Brain_Germinal_Matrix,Brain_Hippocampus_Middle,Brain_Inferior_Temporal_Lobe,Brain_Substantia_Nigra,Breast_Myoepithelial_Primary_…	ADRENAL,BLOOD,BONE,BRAIN,BREAST,CERVIX,ENDODERM,ESC,FAT,GI_COLON,GI_DUODENUM,GI_ESOPHAGUS,GI_INTESTINE,GI_RECTUM,GI_STOMACH,HEART,KIDNEY,LIVER,LUNG,MUSCLE,MUSCLE_LEG,Mesendoderm,OVARY,PANCREAS,PLACENTA,SKIN,SPLEEN,STROMAL_CONNECTIVE,STRONAL_CONNECTIVE,THYMUS,Trophoblast,VASCULAR,iPSC	A549_EtOH_0.02pct_Lung_Carcinoma_Cell_Line,Adipose_Nuclei,Aorta,Bone_Marrow_Derived_Cultured_Mesenchymal_Stem_Cells,Brain_Angular_Gyrus,Brain_Anterior_Caudate,Brain_Cingulate_Gyrus,Brain_Dorsolateral_Prefrontal_Cortex,Brain_Hippocampus_Middle,Brain_Inferior_Temporal_Lobe,Brain_Substantia_Nigra,Colon_Smooth_Muscle,Colonic_Mucosa,Dnd41_TCell_Leukemia_Cell_Line,Duodenum_Smooth_Muscle,Esophagus,Fetal…	ADRENAL,BLOOD,BONE,BRAIN,BREAST,CERVIX,ENDODERM,ESC,FAT,GI_COLON,GI_DUODENUM,GI_ESOPHAGUS,GI_INTESTINE,GI_RECTUM,GI_STOMACH,HEART,LIVER,LUNG,MUSCLE,MUSCLE_LEG,Mesendoderm,OVARY,PANCREAS,PLACENTA,SKIN,SPLEEN,STROMAL_CONNECTIVE,STRONAL_CONNECTIVE,THYMUS,VASCULAR,iPSC	.	.	.		.	A	C	C	C	C	C/C,C/C	rs17511872	AF=0.0171725	-0.032	0.116	0.455	0.011	0.005	0.555	230.5	2.32555e-31	10.15	0	4	DYNC1H1
chr15	60667609	60667610	SNP	4	HACN,enhancer,openChrom,promoter	.	.	.	.	HACN	Fetal_Brain_Female,Fetal_Brain_Male	BRAIN	A549_EtOH_0.02pct_Lung_Carcinoma_Cell_Line,Adipose_Derived_Mesenchymal_Stem_Cell_Cultured_Cells,Bone_Marrow_Derived_Cultured_Mesenchymal_Stem_Cells,Duodenum_Smooth_Muscle,Foreskin_Fibroblast_Primary_Cells_skin01,HUVEC_Umbilical_Vein_Endothelial_Primary_Cells,HepG2_Hepatocellular_Carcinoma_Cell_Line,Mesenchymal_Stem_Cell_Derived_Chondrocyte_Cultured_Cells,Osteoblast_Primary_Cells,Skeletal_Muscle_F…	BONE,ENDODERM,GI_DUODENUM,LIVER,LUNG,MUSCLE,SKIN,STROMAL_CONNECTIVE,STRONAL_CONNECTIVE,VASCULAR	A549_EtOH_0.02pct_Lung_Carcinoma_Cell_Line,Adipose_Nuclei,Aorta,Bone_Marrow_Derived_Cultured_Mesenchymal_Stem_Cells,Duodenum_Smooth_Muscle,Esophagus,Fetal_Muscle_Leg,Fetal_Muscle_Trunk,Foreskin_Fibroblast_Primary_Cells_skin01,Foreskin_Fibroblast_Primary_Cells_skin02,Gastric,H1_BMP4_Derived_Mesendoderm_Cultured_Cells,H1_BMP4_Derived_Trophoblast_Cultured_Cells,H1_Derived_Mesenchymal_Stem_Cells,HMEC…	BONE,BRAIN,BREAST,CERVIX,ENDODERM,ESC,FAT,GI_DUODENUM,GI_ESOPHAGUS,GI_RECTUM,GI_STOMACH,HEART,LIVER,LUNG,MUSCLE,MUSCLE_LEG,Mesendoderm,PANCREAS,SKIN,STROMAL_CONNECTIVE,STRONAL_CONNECTIVE,Trophoblast,VASCULAR	.	.	.	.	.	G	A	A	A	A	A/A,A/A	rs569577647	AF=0.000199681	1.471	0.965	0.53	0.999	0.991	0.982	1533.1	2.84277e-221	18.54	0.106106	.	ANXA2,FOXB1
chr15	68908283	68908284	SNP	4	DE_gene,TFBS,enhancer,motif_alter	SETDB1	.	MOTIFBR=SETDB1#POU6F1_1#68908275#68908286#-#2#0.000000#0.125000,SETDB1#HNF4_known4#68908275#68908288#+#10#0.000000#0.181818	.	.	.	.	.	.	Adipose_Nuclei,Brain_Angular_Gyrus,Brain_Anterior_Caudate,Brain_Cingulate_Gyrus,Brain_Dorsolateral_Prefrontal_Cortex,Brain_Hippocampus_Middle,Brain_Inferior_Temporal_Lobe,Brain_Substantia_Nigra,Fetal_Intestine_Large,Fetal_Stomach,Ovary,Rectal_Smooth_Muscle,Right_Atrium	BRAIN,FAT,GI_INTESTINE,GI_RECTUM,GI_STOMACH,HEART,OVARY	.	.	CORO2B	testis	.	T	C	C	C	C	C/C,C/C	rs74020255	AF=0.0421326	1.79	1.783	0.651	0.001	0.001	0.044	.	.	5.063	0.053691	2b	ANP32A,CORO2B
chr15	68909044	68909045	SNP	4	DE_gene,TFBS,enhancer,promoter	FOXP2,REST	.	.	.	.	.	.	Brain_Germinal_Matrix,Brain_Hippocampus_Middle,Muscle_Satellite_Cultured_Cells,iPS_DF_19.11_Cells	BRAIN,MUSCLE,iPSC	Brain_Angular_Gyrus,Brain_Anterior_Caudate,Brain_Cingulate_Gyrus,Brain_Dorsolateral_Prefrontal_Cortex,Brain_Hippocampus_Middle,Brain_Inferior_Temporal_Lobe,Brain_Substantia_Nigra,Fetal_Stomach,H1_Derived_Mesenchymal_Stem_Cells,NH-A_Astrocytes_Primary_Cells,Ovary,Rectal_Mucosa_Donor_29,Right_Ventricle,Skeletal_Muscle_Female,hESC_Derived_CD56+_Ectoderm_Cultured_Cells	BRAIN,ENDODERM,GI_RECTUM,GI_STOMACH,HEART,MUSCLE,OVARY,STROMAL_CONNECTIVE	.	.	CORO2B	testis	.	T	C	C	C	C	C/C,C/C	rs74020257	AF=0.0407348	-0.053	-0.044	0.651	0	0	0	.	.	3.172	0.074388	4	ANP32A,CORO2B
chr15	68913154	68913155	SNP	4	DE_gene,TFBS,openChrom,promoter	CEBPB,FOXP2,ZNF263	.	.	.	.	Fetal_Brain_Female,Fetal_Stomach,H1_Derived_Mesenchymal_Stem_Cells,H1_Derived_Neuronal_Progenitor_Cultured_Cells,Ovary,Pancreas	BRAIN,GI_STOMACH,OVARY,PANCREAS,STROMAL_CONNECTIVE	Brain_Cingulate_Gyrus,Brain_Germinal_Matrix,Foreskin_Fibroblast_Primary_Cells_skin01,Stomach_Smooth_Muscle	BRAIN,GI_STOMACH,SKIN	.	.	.	.	CORO2B	testis	.	T	C	C	C	C	C/C,C/C	rs547652797	AF=0.00219649	-0.121	0.002	0.48	0	0	0.123	.	.	4.202	0.056701	.	ANP32A,CORO2B
chr15	68913502	68913503	SNP	4	DE_gene,TFBS,enhancer,promoter	FOXP2,POLR2A	.	.	.	.	.	.	Adipose_Derived_Mesenchymal_Stem_Cell_Cultured_Cells,Adipose_Nuclei,Bone_Marrow_Derived_Cultured_Mesenchymal_Stem_Cells,Brain_Angular_Gyrus,Brain_Anterior_Caudate,Brain_Cingulate_Gyrus,Brain_Dorsolateral_Prefrontal_Cortex,Brain_Germinal_Matrix,Brain_Hippocampus_Middle,Brain_Inferior_Temporal_Lobe,Brain_Substantia_Nigra,Cortex_derived_primary_cultured_neurospheres,Fetal_Brain_Female,Fetal_Brain_Ma…	BONE,BRAIN,FAT,GI_RECTUM,GI_STOMACH,LUNG,MUSCLE,SKIN,STROMAL_CONNECTIVE,STRONAL_CONNECTIVE	Adipose_Nuclei,Aorta,Bone_Marrow_Derived_Cultured_Mesenchymal_Stem_Cells,Brain_Angular_Gyrus,Brain_Anterior_Caudate,Brain_Cingulate_Gyrus,Brain_Dorsolateral_Prefrontal_Cortex,Brain_Hippocampus_Middle,Brain_Inferior_Temporal_Lobe,Brain_Substantia_Nigra,Colonic_Mucosa,Duodenum_Smooth_Muscle,Esophagus,Fetal_Adrenal_Gland,Fetal_Intestine_Large,Fetal_Intestine_Small,Fetal_Muscle_Leg,Fetal_Muscle_Trunk…	ADRENAL,BONE,BRAIN,ENDODERM,FAT,GI_COLON,GI_DUODENUM,GI_ESOPHAGUS,GI_INTESTINE,GI_RECTUM,GI_STOMACH,HEART,LIVER,LUNG,MUSCLE,MUSCLE_LEG,OVARY,SKIN,STROMAL_CONNECTIVE,STRONAL_CONNECTIVE,VASCULAR	.	.	CORO2B	testis	.	G	T	T	T	T	T/T,T/T	rs533860777	AF=0.000798722,0.00299521	-0.592	-0.602	0.393	0	0	0.133	.	.	3.736	0.074388	.	ANP32A,CORO2B
chr15	68913515	68913516	SNP	4	DE_gene,TFBS,enhancer,promoter	FOXP2	.	.	.	.	.	.	Adipose_Derived_Mesenchymal_Stem_Cell_Cultured_Cells,Adipose_Nuclei,Bone_Marrow_Derived_Cultured_Mesenchymal_Stem_Cells,Brain_Angular_Gyrus,Brain_Anterior_Caudate,Brain_Cingulate_Gyrus,Brain_Dorsolateral_Prefrontal_Cortex,Brain_Germinal_Matrix,Brain_Hippocampus_Middle,Brain_Inferior_Temporal_Lobe,Brain_Substantia_Nigra,Cortex_derived_primary_cultured_neurospheres,Fetal_Brain_Female,Fetal_Brain_Ma…	BONE,BRAIN,FAT,GI_RECTUM,GI_STOMACH,LUNG,MUSCLE,SKIN,STROMAL_CONNECTIVE,STRONAL_CONNECTIVE	Adipose_Nuclei,Aorta,Bone_Marrow_Derived_Cultured_Mesenchymal_Stem_Cells,Brain_Angular_Gyrus,Brain_Anterior_Caudate,Brain_Cingulate_Gyrus,Brain_Dorsolateral_Prefrontal_Cortex,Brain_Hippocampus_Middle,Brain_Inferior_Temporal_Lobe,Brain_Substantia_Nigra,Colonic_Mucosa,Duodenum_Smooth_Muscle,Esophagus,Fetal_Adrenal_Gland,Fetal_Intestine_Large,Fetal_Intestine_Small,Fetal_Muscle_Leg,Fetal_Muscle_Trunk…	ADRENAL,BONE,BRAIN,ENDODERM,FAT,GI_COLON,GI_DUODENUM,GI_ESOPHAGUS,GI_INTESTINE,GI_RECTUM,GI_STOMACH,HEART,LIVER,LUNG,MUSCLE,MUSCLE_LEG,OVARY,SKIN,STROMAL_CONNECTIVE,STRONAL_CONNECTIVE,VASCULAR	.	.	CORO2B	testis	.	C	T	T	T	T	T/T,T/T	rs555410302	AF=0.00219649	1.442	1.395	0.393	0.001	0.001	0.027	.	.	7.078	0.074388	.	ANP32A,CORO2B
chr15	70362584	70362585	SNP	4	TFBS,enhancer,motif_alter,openChrom	POLR2A	.	MOTIFBR=DHS#PPARA_1#70362582#70362602#-#17#0.000000#0.285714	.	.	Gastric	GI_STOMACH	.	.	Brain_Cingulate_Gyrus,Brain_Dorsolateral_Prefrontal_Cortex,Brain_Inferior_Temporal_Lobe,Colon_Smooth_Muscle	BRAIN,GI_COLON	.	.	.		.	A	G	G	G	G	G/G,G/G	rs12593849	AF=0.063099	0.087	0.163	0.557	0	0.001	0.001	.	.	5.058	0.099367	5	RPLP1,TLE3
chr16	3174329	3174330	SNP	4	TFBS,enhancer,openChrom,promoter	ATF3,FOXM1,HMGN3,IRF1,KDM5B,MAX,MAZ,MXI1,MYC,NFYA,NFYB,PAX5,PHF8,PML,POLR2A,RFX5,SAP30,SIN3A,SMARCB1,SP1,SP4,SREBP1,STAT3,TAF1,TBP,TCF7L2,YY1,ZBTB7A,ZNF263	.	.	.	.	Breast_variant_Human_Mammary_Epithelial_Cells_(vHMEC),Fetal_Adrenal_Gland,Fetal_Brain_Female,Fetal_Brain_Male,Fetal_Heart,Fetal_Intestine_Large,Fetal_Intestine_Small,Fetal_Kidney,Fetal_Lung,Fetal_Muscle_Leg,Fetal_Muscle_Trunk,Fetal_Stomach,Fetal_Thymus,Foreskin_Fibroblast_Primary_Cells_skin01,Foreskin_Fibroblast_Primary_Cells_skin02,Foreskin_Keratinocyte_Primary_Cells_skin02,Gastric,H1_BMP4_Deriv…	ADRENAL,BLOOD,BRAIN,BREAST,ESC,GI_INTESTINE,GI_STOMACH,HEART,KIDNEY,LUNG,MUSCLE,MUSCLE_LEG,Mesendoderm,OVARY,PANCREAS,PLACENTA,SKIN,STROMAL_CONNECTIVE,THYMUS,Trophoblast,iPSC	A549_EtOH_0.02pct_Lung_Carcinoma_Cell_Line,Adipose_Derived_Mesenchymal_Stem_Cell_Cultured_Cells,Adipose_Nuclei,Bone_Marrow_Derived_Cultured_Mesenchymal_Stem_Cells,Brain_Angular_Gyrus,Brain_Anterior_Caudate,Brain_Cingulate_Gyrus,Brain_Dorsolateral_Prefrontal_Cortex,Brain_Germinal_Matrix,Brain_Hippocampus_Middle,Brain_Inferior_Temporal_Lobe,Brain_Substantia_Nigra,Breast_Myoepithelial_Primary_Cells,…	ADRENAL,BLOOD,BONE,BRAIN,BREAST,CERVIX,ENDODERM,ESC,FAT,GI_COLON,GI_DUODENUM,GI_ESOPHAGUS,GI_INTESTINE,GI_RECTUM,GI_STOMACH,HEART,KIDNEY,LIVER,LUNG,MUSCLE,MUSCLE_LEG,OVARY,PANCREAS,PLACENTA,SKIN,SPLEEN,STROMAL_CONNECTIVE,STRONAL_CONNECTIVE,THYMUS,VASCULAR,iPSC	A549_EtOH_0.02pct_Lung_Carcinoma_Cell_Line,Brain_Angular_Gyrus,Brain_Hippocampus_Middle,Brain_Inferior_Temporal_Lobe,Brain_Substantia_Nigra,Colon_Smooth_Muscle,Esophagus,Fetal_Adrenal_Gland,Fetal_Intestine_Large,Fetal_Intestine_Small,Fetal_Muscle_Leg,Fetal_Muscle_Trunk,Fetal_Stomach,Fetal_Thymus,Foreskin_Fibroblast_Primary_Cells_skin01,Foreskin_Fibroblast_Primary_Cells_skin02,Foreskin_Keratinocyt…	ADRENAL,BLOOD,BRAIN,CERVIX,GI_COLON,GI_ESOPHAGUS,GI_INTESTINE,GI_RECTUM,GI_STOMACH,HEART,LIVER,LUNG,MUSCLE,MUSCLE_LEG,PANCREAS,PLACENTA,SKIN,SPLEEN,THYMUS	.	.	.		.	T	A	A	A	A	A/A,A/A	rs74005592	AF=0.0656949	0.218	-0.107	0.455	0.015	0.001	0	.	.	8.3	0	4	ZNF205,ZNF213
chr16	3194052	3194053	SNP	4	TFBS,enhancer,motif_alter,promoter	POLR2A,TAF1	.	MOTIFBR=TAF1#SIN3A_disc7#3194041#3194055#-#2#0.088235#0.181115,TAF1#RAD21_disc5#3194053#3194066#+#1#0.000000#0.492447	.	.	.	.	Colonic_Mucosa,Duodenum_Mucosa,Fetal_Adrenal_Gland,Foreskin_Fibroblast_Primary_Cells_skin01,Foreskin_Melanocyte_Primary_Cells_skin01,H1_Derived_Mesenchymal_Stem_Cells,HepG2_Hepatocellular_Carcinoma_Cell_Line,Liver,Pancreas,Rectal_Mucosa_Donor_29,Rectal_Mucosa_Donor_31,Skeletal_Muscle_Female,Skeletal_Muscle_Male	ADRENAL,GI_COLON,GI_DUODENUM,GI_RECTUM,LIVER,MUSCLE,PANCREAS,SKIN,STROMAL_CONNECTIVE	Brain_Substantia_Nigra,Colonic_Mucosa,Fetal_Adrenal_Gland,Fetal_Intestine_Large,Fetal_Intestine_Small,Fetal_Muscle_Leg,Fetal_Muscle_Trunk,Foreskin_Fibroblast_Primary_Cells_skin02,Foreskin_Melanocyte_Primary_Cells_skin01,HepG2_Hepatocellular_Carcinoma_Cell_Line,Left_Ventricle,Liver,Psoas_Muscle,Rectal_Mucosa_Donor_29,Rectal_Mucosa_Donor_31,Right_Atrium,Right_Ventricle,Sigmoid_Colon,Skeletal_Muscle…	ADRENAL,BRAIN,GI_COLON,GI_INTESTINE,GI_RECTUM,HEART,LIVER,MUSCLE,MUSCLE_LEG,SKIN,SPLEEN	.	.	.		.	C	T	T	T	T	T/T,T/T	rs556850843	AF=0.00419329	0.789	1.381	-0.236	0	0.001	0.002	.	.	7.725	0	.	caspace
chr16	23266059	23266060	SNP	4	TFBS,enhancer,openChrom,promoter	FOS,POLR2A	.	.	.	.	Breast_variant_Human_Mammary_Epithelial_Cells_(vHMEC),iPS_DF_6.9_Cells	BREAST,iPSC	NH-A_Astrocytes_Primary_Cells,Osteoblast_Primary_Cells	BONE,BRAIN	HMEC_Mammary_Epithelial_Primary_Cells,Rectal_Mucosa_Donor_31,hESC_Derived_CD56+_Ectoderm_Cultured_Cells	BREAST,ENDODERM,GI_RECTUM	.	.	.		.	G	A	A	A	A	A/A,A/A	rs74968587	AF=0.028754	-0.42	-0.489	0.525	0	0	0.001	.	.	3.304	0.061011	5	SCNN1B,SCNN1G
chr16	75036222	75036223	SNP	4	DE_gene,enhancer,openChrom,promoter	.	.	.	.	.	Fetal_Thymus,Primary_hematopoietic_stem_cells_G-CSF-mobilized_Female,Primary_hematopoietic_stem_cells_G-CSF-mobilized_Male	BLOOD,THYMUS	Adipose_Derived_Mesenchymal_Stem_Cell_Cultured_Cells,Brain_Cingulate_Gyrus,Brain_Germinal_Matrix,Dnd41_TCell_Leukemia_Cell_Line,Fetal_Brain_Female,Fetal_Heart,Fetal_Thymus,GM12878_Lymphoblastoid_Cells,HSMM_cell_derived_Skeletal_Muscle_Myotubes_Cells,HepG2_Hepatocellular_Carcinoma_Cell_Line,Primary_hematopoietic_stem_cells,Primary_hematopoietic_stem_cells_G-CSF-mobilized_Female,Primary_hematopoiet…	BLOOD,BRAIN,GI_STOMACH,HEART,LIVER,MUSCLE,STRONAL_CONNECTIVE,THYMUS	Brain_Inferior_Temporal_Lobe,Dnd41_TCell_Leukemia_Cell_Line,Fetal_Adrenal_Gland,Fetal_Thymus,HSMM_cell_derived_Skeletal_Muscle_Myotubes_Cells,Left_Ventricle,Placenta,Primary_hematopoietic_stem_cells_G-CSF-mobilized_Female,Right_Atrium,Stomach_Smooth_Muscle	ADRENAL,BLOOD,BRAIN,GI_STOMACH,HEART,MUSCLE,PLACENTA,THYMUS	.	.	LDHD	kidney	.	A	T	T	T	T	T/T,T/T	rs77444325	AF=0.0307508	1.103	1.025	-0.464	0.001	0.001	0.004	.	.	2.005	0.071543	4	LDHD,ZNRF1
chr16	75082554	75082555	SNP	4	DE_gene,enhancer,openChrom,promoter	.	.	.	.	.	IMR90_fetal_lung_fibroblasts_Cell_Line,Primary_hematopoietic_stem_cells_G-CSF-mobilized_Female,Primary_hematopoietic_stem_cells_G-CSF-mobilized_Male	BLOOD,LUNG	Skeletal_Muscle_Male	MUSCLE	Adipose_Nuclei,Colon_Smooth_Muscle,Dnd41_TCell_Leukemia_Cell_Line,Esophagus,H9_Cells,HSMM_cell_derived_Skeletal_Muscle_Myotubes_Cells,HUES48_Cells,K562_Leukemia_Cells,Left_Ventricle,Primary_T_cells_effector/memory_enriched_from_peripheral_blood,Primary_hematopoietic_stem_cells_G-CSF-mobilized_Female,Rectal_Smooth_Muscle,Right_Atrium,Right_Ventricle,Skeletal_Muscle_Female,Stomach_Smooth_Muscle,iPS…	BLOOD,ESC,FAT,GI_COLON,GI_ESOPHAGUS,GI_RECTUM,GI_STOMACH,HEART,MUSCLE,iPSC	.	.	LDHD	kidney	.	A	G	G	G	G	G/G,G/G	rs4307974	AF=0.00119808	-0.528	-0.561	-0.572	0.012	0.009	0.041	.	.	0.703	0.073086	4	LDHD,ZNRF1
chr16	75088101	75088102	SNP	4	DE_gene,TFBS,enhancer,promoter	EP300,GATA1,HDAC8,HNF4A,MBD4,MYBL2,POLR2A,RXRA,SP1,YY1,ZNF217	.	.	.	.	.	.	A549_EtOH_0.02pct_Lung_Carcinoma_Cell_Line,Adipose_Nuclei,HSMM_cell_derived_Skeletal_Muscle_Myotubes_Cells,Mesenchymal_Stem_Cell_Derived_Adipocyte_Cultured_Cells,Rectal_Mucosa_Donor_31	FAT,GI_RECTUM,LUNG,MUSCLE	A549_EtOH_0.02pct_Lung_Carcinoma_Cell_Line,Adipose_Nuclei,Brain_Anterior_Caudate,Brain_Cingulate_Gyrus,Brain_Dorsolateral_Prefrontal_Cortex,Brain_Hippocampus_Middle,Brain_Inferior_Temporal_Lobe,Brain_Substantia_Nigra,Colon_Smooth_Muscle,Colonic_Mucosa,Dnd41_TCell_Leukemia_Cell_Line,Duodenum_Smooth_Muscle,Esophagus,Fetal_Adrenal_Gland,Fetal_Intestine_Large,Fetal_Intestine_Small,Fetal_Muscle_Leg,Fe…	ADRENAL,BLOOD,BRAIN,CERVIX,ENDODERM,ESC,FAT,GI_COLON,GI_DUODENUM,GI_ESOPHAGUS,GI_INTESTINE,GI_RECTUM,GI_STOMACH,HEART,LIVER,LUNG,MUSCLE,MUSCLE_LEG,THYMUS,iPSC	.	.	LDHD	kidney	.	T	C	C	C	C	C/C,C/C	rs368080720	AF=0.000998403	-0.045	-0.061	0.651	0.002	0.001	0.952	.	.	13.9	0.119485	.	LDHD,ZNRF1
chr16	75102718	75102719	SNP	4	DE_gene,TFBS,enhancer,promoter	SPI1	.	.	.	.	.	.	Primary_hematopoietic_stem_cells_G-CSF-mobilized_Male	BLOOD	Dnd41_TCell_Leukemia_Cell_Line,Fetal_Thymus,Primary_hematopoietic_stem_cells_G-CSF-mobilized_Female,Thymus	BLOOD,THYMUS	.	.	LDHD	kidney	.	C	A	A	A	A	A/A,A/A	rs377589842	AF=0.00119808	-0.624	-0.653	0.379	0	0	0.008	.	.	6.957	0.053691	.	LDHD,ZNRF1
chr16	75134066	75134067	SNP	4	DE_gene,TFBS,enhancer,openChrom	CTCF	.	.	.	.	Fetal_Thymus	THYMUS	.	.	Adipose_Nuclei,Brain_Anterior_Caudate,Brain_Cingulate_Gyrus,Brain_Dorsolateral_Prefrontal_Cortex,Brain_Hippocampus_Middle,Brain_Inferior_Temporal_Lobe,Dnd41_TCell_Leukemia_Cell_Line,Esophagus,Fetal_Adrenal_Gland,Fetal_Stomach,Fetal_Thymus,Foreskin_Fibroblast_Primary_Cells_skin01,GM12878_Lymphoblastoid_Cells,H1_Cells,HUES48_Cells,HUES6_Cells,IMR90_fetal_lung_fibroblasts_Cell_Line,Left_Ventricle,Lu…	ADRENAL,BLOOD,BRAIN,ENDODERM,ESC,FAT,GI_COLON,GI_ESOPHAGUS,GI_INTESTINE,GI_RECTUM,GI_STOMACH,HEART,LUNG,MUSCLE,PLACENTA,SKIN,SPLEEN,THYMUS,iPSC	.	.	LDHD	kidney	.	G	A	A	A	A	A/A,A/A	rs139929407	AF=0.00119808	-0.973	-1.039	-0.368	0	0	0.255	.	.	7.949	0.119485	.	LDHD,ZNRF1
chr16	75144150	75144151	SNP	4	DE_gene,TFBS,enhancer,promoter	CTCF,ELF1,POLR2A,RAD21	.	.	.	.	.	.	Adipose_Derived_Mesenchymal_Stem_Cell_Cultured_Cells,Adipose_Nuclei,Brain_Angular_Gyrus,Brain_Anterior_Caudate,Brain_Cingulate_Gyrus,Brain_Dorsolateral_Prefrontal_Cortex,Brain_Hippocampus_Middle,Brain_Inferior_Temporal_Lobe,Breast_variant_Human_Mammary_Epithelial_Cells_(vHMEC),Colon_Smooth_Muscle,Colonic_Mucosa,Dnd41_TCell_Leukemia_Cell_Line,Duodenum_Smooth_Muscle,Fetal_Heart,Foreskin_Fibroblast_…	BLOOD,BRAIN,BREAST,FAT,GI_COLON,GI_DUODENUM,GI_RECTUM,GI_STOMACH,HEART,MUSCLE,SKIN,STRONAL_CONNECTIVE	A549_EtOH_0.02pct_Lung_Carcinoma_Cell_Line,Adipose_Nuclei,Aorta,Brain_Angular_Gyrus,Brain_Anterior_Caudate,Brain_Cingulate_Gyrus,Brain_Dorsolateral_Prefrontal_Cortex,Brain_Hippocampus_Middle,Brain_Inferior_Temporal_Lobe,Brain_Substantia_Nigra,Colon_Smooth_Muscle,Colonic_Mucosa,Dnd41_TCell_Leukemia_Cell_Line,Duodenum_Smooth_Muscle,Esophagus,Fetal_Adrenal_Gland,Fetal_Muscle_Leg,Fetal_Muscle_Trunk,F…	ADRENAL,BLOOD,BRAIN,BREAST,ENDODERM,FAT,GI_COLON,GI_DUODENUM,GI_ESOPHAGUS,GI_INTESTINE,GI_RECTUM,GI_STOMACH,HEART,LIVER,LUNG,MUSCLE,MUSCLE_LEG,OVARY,PANCREAS,PLACENTA,SKIN,THYMUS,VASCULAR	.	.	LDHD	kidney	.	T	C	C	C	C	C/C,C/C	rs376455786	AF=0.00119808	0.612	1.103	0.559	0.021	0.052	0.009	.	.	1.516	0.139742	.	LDHD,ZNRF1
chr16	75156233	75156234	SNP	4	DE_gene,TFBS,enhancer,promoter	BHLHE40,EP300,FOSL2,FOXA1,JUND,KAP1,NR2F2,RXRA,SETDB1,TAL1,TCF12	.	.	.	.	.	.	Adipose_Nuclei,Duodenum_Mucosa,Mesenchymal_Stem_Cell_Derived_Adipocyte_Cultured_Cells	FAT,GI_DUODENUM	K562_Leukemia_Cells,Lung	BLOOD,LUNG	.	.	LDHD	kidney	.	T	G	G	G	G	G/G,G/G	rs8063477	AF=0.0583067	0.167	0.162	0.165	0.012	0.01	0.01	.	.	1.534	0.065574	4	LDHD,ZFP1
chr17	10525642	10525643	SNC	4	TFBS,TFBS_motif,enhancer,motif_alter	CTCF	CTCF	MOTIFBR=CTCF,DHS#STAT_disc7#10525634#10525647#+#10#0.052632#0.383459	.	.	.	.	.	.	Esophagus,Fetal_Muscle_Leg,Fetal_Muscle_Trunk,Fetal_Thymus,Foreskin_Keratinocyte_Primary_Cells_skin03,HMEC_Mammary_Epithelial_Primary_Cells,HSMM_cell_derived_Skeletal_Muscle_Myotubes_Cells,NHEK-Epidermal_Keratinocyte_Primary_Cells,Skeletal_Muscle_Female	BREAST,GI_ESOPHAGUS,MUSCLE,MUSCLE_LEG,SKIN,THYMUS	.	.	.		.	A	C	C	C	C	C/C,C/C	.	0	-0.201	-0.207	-2.122	0	0	0	.	.	0.084	0.053691	.	MYH2,MYH3
chr17	10526215	10526216	SNP	4	TFBS,enhancer,openChrom,promoter	STAT3	.	.	.	.	Fetal_Muscle_Leg,Fetal_Thymus	MUSCLE_LEG,THYMUS	Breast_Myoepithelial_Primary_Cells,Breast_variant_Human_Mammary_Epithelial_Cells_(vHMEC),Fetal_Muscle_Leg,Fetal_Muscle_Trunk,Foreskin_Keratinocyte_Primary_Cells_skin02,Foreskin_Keratinocyte_Primary_Cells_skin03,HMEC_Mammary_Epithelial_Primary_Cells,HSMM_cell_derived_Skeletal_Muscle_Myotubes_Cells,NHEK-Epidermal_Keratinocyte_Primary_Cells,Skeletal_Muscle_Female	BREAST,MUSCLE,MUSCLE_LEG,SKIN	Esophagus,Fetal_Muscle_Leg,Fetal_Muscle_Trunk,Fetal_Thymus,Foreskin_Keratinocyte_Primary_Cells_skin03,HMEC_Mammary_Epithelial_Primary_Cells,HSMM_Skeletal_Muscle_Myoblasts_Cells,HSMM_cell_derived_Skeletal_Muscle_Myotubes_Cells,NHEK-Epidermal_Keratinocyte_Primary_Cells,Pancreas,Skeletal_Muscle_Female,Thymus	BREAST,GI_ESOPHAGUS,MUSCLE,MUSCLE_LEG,PANCREAS,SKIN,THYMUS	.	.	.		.	C	G	G	G	G	G/G,G/G	rs116872063	AF=0.000399361,0.00898562	1.161	1.188	0.646	0.002	0.002	0.002	.	.	6.485	0.06567	4	MYH2,MYH3
chr17	45259069	45259070	SNC	4	DE_gene,TFBS,enhancer,promoter	GABPA,MAZ,MYC	.	.	.	.	.	.	Colonic_Mucosa,ES-UCSF4_Cells,Gastric,Primary_hematopoietic_stem_cells_G-CSF-mobilized_Female,Stomach_Smooth_Muscle	BLOOD,ESC,GI_COLON,GI_STOMACH	Foreskin_Fibroblast_Primary_Cells_skin02,Stomach_Smooth_Muscle	GI_STOMACH,SKIN	.	.	CDC27	testis	.	C	G	G	G	G	G/G,G/G	.	0	0.233	0.369	0.457	0.002	0.001	0.053	.	.	6.341	0	.	CDC27,RPRML
chr17	45275588	45275589	SNP	4	DE_gene,TFBS,enhancer,openChrom	JUND,PML	.	.	.	.	Fetal_Brain_Male	BRAIN	.	.	Fetal_Muscle_Leg,Fetal_Muscle_Trunk,HSMM_Skeletal_Muscle_Myoblasts_Cells,HSMM_cell_derived_Skeletal_Muscle_Myotubes_Cells,hESC_Derived_CD56+_Mesoderm_Cultured_Cells	ENDODERM,MUSCLE,MUSCLE_LEG	.	.	CDC27	testis	.	T	C	C	C	C	C/C,C/C	rs73319525	AF=0.0239617	-1.884	-2.043	-0.47	0	0	0.03	268.2	5.35952e-12	0.782	0.053691	5	CDC27,MYL4
chr17	45281200	45281201	SNP	4	DE_gene,TFBS,enhancer,openChrom	IKZF1	.	.	.	.	Small_Intestine	GI_INTESTINE	.	.	Adipose_Nuclei,Bone_Marrow_Derived_Cultured_Mesenchymal_Stem_Cells,Dnd41_TCell_Leukemia_Cell_Line,Esophagus,GM12878_Lymphoblastoid_Cells,H1_Derived_Mesenchymal_Stem_Cells,HSMM_Skeletal_Muscle_Myoblasts_Cells,HSMM_cell_derived_Skeletal_Muscle_Myotubes_Cells,K562_Leukemia_Cells,Lung,Mesenchymal_Stem_Cell_Derived_Chondrocyte_Cultured_Cells,Primary_B_cells_from_peripheral_blood,Primary_Natural_Killer…	BLOOD,FAT,GI_ESOPHAGUS,GI_INTESTINE,GI_RECTUM,HEART,LUNG,MUSCLE,SPLEEN,STROMAL_CONNECTIVE,STRONAL_CONNECTIVE	.	.	CDC27	testis	.	G	C	C	C	C	C/C,C/C	rs115023136	AF=0.0239617	0.387	0.341	0.457	0	0	0.003	.	.	0.805	0.071543	5	CDC27,MYL4
chr17	45283140	45283141	SNP	4	TFBS,TFBS_motif,openChrom,promoter	EBF1,IKZF1,IRF1,IRF4,MYC,NFIC,PAX5,POLR2A,POU2F2,RAD21,RELA,RUNX3,SP1,TCF12,TCF3	EBF1	.	.	.	Breast_variant_Human_Mammary_Epithelial_Cells_(vHMEC),Fetal_Heart,Fetal_Intestine_Small,Fetal_Kidney,Fetal_Lung,Fetal_Muscle_Leg,Fetal_Muscle_Trunk,Fetal_Stomach,Foreskin_Fibroblast_Primary_Cells_skin01,Foreskin_Fibroblast_Primary_Cells_skin02,Foreskin_Keratinocyte_Primary_Cells_skin02,Gastric,H1_BMP4_Derived_Mesendoderm_Cultured_Cells,H1_BMP4_Derived_Trophoblast_Cultured_Cells,H1_Cells,H9_Cells,…	BLOOD,BREAST,ESC,GI_INTESTINE,GI_STOMACH,HEART,KIDNEY,LUNG,MUSCLE,MUSCLE_LEG,Mesendoderm,OVARY,PANCREAS,PLACENTA,SKIN,Trophoblast,iPSC	Adipose_Derived_Mesenchymal_Stem_Cell_Cultured_Cells,Adipose_Nuclei,Breast_Myoepithelial_Primary_Cells,Duodenum_Mucosa,Duodenum_Smooth_Muscle,Fetal_Muscle_Leg,Foreskin_Fibroblast_Primary_Cells_skin01,Foreskin_Fibroblast_Primary_Cells_skin02,Foreskin_Keratinocyte_Primary_Cells_skin02,GM12878_Lymphoblastoid_Cells,HepG2_Hepatocellular_Carcinoma_Cell_Line,Mesenchymal_Stem_Cell_Derived_Adipocyte_Cultu…	BLOOD,BREAST,FAT,GI_DUODENUM,GI_RECTUM,GI_STOMACH,HEART,LIVER,MUSCLE,MUSCLE_LEG,PANCREAS,SKIN,STROMAL_CONNECTIVE,STRONAL_CONNECTIVE	.	.	.	.	.		.	T	C	C	C	C	C/C,C/C	rs73327180	AF=0.0257588	-0.297	-0.384	-0.157	0.872	0.145	0.002	157.6	4.69407e-20	3.166	0.126639	4	MYL4
chr17	45283480	45283481	SNP	4	TFBS,enhancer,openChrom,promoter	RELA	.	.	.	.	Primary_B_cells_from_peripheral_blood	BLOOD	Primary_T_cells_effector/memory_enriched_from_peripheral_blood,Primary_T_helper_memory_cells_from_peripheral_blood_1,Skeletal_Muscle_Female	BLOOD,MUSCLE	Adipose_Nuclei,Aorta,Bone_Marrow_Derived_Cultured_Mesenchymal_Stem_Cells,Brain_Inferior_Temporal_Lobe,Brain_Substantia_Nigra,Colon_Smooth_Muscle,Colonic_Mucosa,Duodenum_Smooth_Muscle,Esophagus,Fetal_Intestine_Large,Fetal_Intestine_Small,Fetal_Muscle_Leg,Fetal_Muscle_Trunk,Fetal_Stomach,Fetal_Thymus,GM12878_Lymphoblastoid_Cells,H1_Derived_Mesenchymal_Stem_Cells,HSMM_Skeletal_Muscle_Myoblasts_Cells…	BLOOD,BONE,BRAIN,FAT,GI_COLON,GI_DUODENUM,GI_ESOPHAGUS,GI_INTESTINE,GI_RECTUM,GI_STOMACH,HEART,LIVER,LUNG,MUSCLE,MUSCLE_LEG,SPLEEN,STROMAL_CONNECTIVE,STRONAL_CONNECTIVE,THYMUS,VASCULAR	.	.	.		.	T	C	C	C	C	C/C,C/C	rs73327183	AF=0.0239617	-1.048	-0.779	-1.084	0	0	0.005	.	.	0.917	0.085055	4	MYL4
chr17	45296833	45296834	SNP	4	DE_gene,TFBS,enhancer,promoter	CCNT2,EGR1,GATA1,MYC,PML,POLR2A,RBBP5,TBP,UBTF	.	.	.	.	.	.	K562_Leukemia_Cells	BLOOD	Fetal_Muscle_Trunk,Fetal_Stomach,K562_Leukemia_Cells,Left_Ventricle,Primary_T_CD8+_memory_cells_from_peripheral_blood	BLOOD,GI_STOMACH,HEART,MUSCLE	.	.	ITGB3	testis	.	G	A	A	A	A	A/A,A/A	rs7217466	AF=0.0225639	-0.269	-0.319	0.375	0	0	0.046	.	.	6.048	0.074388	4	ITGB3,MYL4
chr17	45298240	45298241	SNP	4	DE_gene,enhancer,openChrom,promoter	.	.	.	.	.	Fetal_Thymus,Primary_hematopoietic_stem_cells_G-CSF-mobilized_Male	BLOOD,THYMUS	Foreskin_Fibroblast_Primary_Cells_skin02,Primary_hematopoietic_stem_cells_G-CSF-mobilized_Female,Primary_hematopoietic_stem_cells_G-CSF-mobilized_Male,Primary_hematopoietic_stem_cells_short_term_culture,iPS-18_Cells	BLOOD,SKIN,iPSC	Fetal_Thymus,Foreskin_Fibroblast_Primary_Cells_skin02,Primary_Natural_Killer_cells_from_peripheral_blood,Primary_T_cells_from_peripheral_blood,Primary_T_helper_cells_PMA-I_stimulated,Right_Atrium	BLOOD,HEART,SKIN,THYMUS	.	.	ITGB3	testis	.	T	G	G	G	G	G/G,G/G	rs112343777	AF=0.0345447	-1.213	-1.236	0.557	0	0	0.007	.	.	5.724	0.087844	2b	ITGB3,MYL4
chr17	45308471	45308472	SNP	4	DE_gene,TFBS,enhancer,openChrom,promoter	CEBPB,CEBPD,CTCF,EBF1,ESR1,NR3C1	.	.	.	.	Fetal_Kidney	KIDNEY	Duodenum_Mucosa,GM12878_Lymphoblastoid_Cells,HepG2_Hepatocellular_Carcinoma_Cell_Line,Liver,Primary_B_cells_from_peripheral_blood	BLOOD,GI_DUODENUM,LIVER	IMR90_fetal_lung_fibroblasts_Cell_Line,Liver,Right_Atrium	HEART,LIVER,LUNG	.	.	ITGB3	testis	.	C	T	T	T	T	T/T,T/T	rs191839329	AF=0.00179712	0.431	0.409	0.398	0	0	0	.	.	5.598	0	.	ITGB3,MYL4
chr17	45309096	45309097	SNP	4	DE_gene,TFBS,eQTL,enhancer,promoter	SPI1	.	.	Adipose_Subcutaneous,Adrenal_Gland,Esophagus_Mucosa,Lung,Nerve_Tibial,fibroblasts	.	.	.	Liver	LIVER	Liver	LIVER	.	.	ITGB3	testis	.	A	G	G	G	G	G/G,G/G	rs111480536	AF=0.0275559	-0.032	-0.037	0.299	0	0	0.003	.	.	1.23	0.077194	.	ITGB3,MYL4
chr17	47674246	47674247	SNC	4	TFBS,enhancer,openChrom,promoter	MYBL2,NFIC,SP1,TCF7L2	.	.	.	.	Fetal_Intestine_Small	GI_INTESTINE	hESC_Derived_CD184+_Endoderm_Cultured_Cells	ENDODERM	Brain_Dorsolateral_Prefrontal_Cortex,Colon_Smooth_Muscle,Fetal_Adrenal_Gland,Fetal_Muscle_Leg,HepG2_Hepatocellular_Carcinoma_Cell_Line,Stomach_Smooth_Muscle	ADRENAL,BRAIN,GI_COLON,GI_STOMACH,LIVER,MUSCLE_LEG	.	.	.		.	T	C	C	C	C	C/C,C/C	.	0	0.708	1.368	-0.14	0.04	0.829	0.9	2952	2.51029e-212	13.88	0.099367	.	NXPH3,SPOP
chr17	47687983	47687984	SNC	4	enhancer,motif_alter,openChrom,promoter	.	.	MOTIFBR=DHS#BCL_disc10#47687983#47687993#+#2#0.175268#0.411879	.	.	Ovary	OVARY	Lung	LUNG	Aorta,Brain_Hippocampus_Middle,Colon_Smooth_Muscle,Duodenum_Smooth_Muscle,Lung,Mesenchymal_Stem_Cell_Derived_Chondrocyte_Cultured_Cells,Monocytes-CD14+_RO01746_Primary_Cells,Rectal_Smooth_Muscle,Right_Ventricle	BLOOD,BRAIN,GI_COLON,GI_DUODENUM,GI_RECTUM,HEART,LUNG,STROMAL_CONNECTIVE,VASCULAR	.	.	.		.	G	A	A	A	A	A/A,A/A	.	0	-0.017	-0.064	0.393	0	0	0.261	.	.	8.947	0.106106	.	NXPH3,SPOP
chr17	47724179	47724180	SNP	4	TFBS,enhancer,openChrom,promoter	EBF1,FOS,FOXA1,JUN,KAP1,NFIC,POLR2A,USF1	.	.	.	.	Fetal_Intestine_Small,Fetal_Lung,Foreskin_Keratinocyte_Primary_Cells_skin02,Foreskin_Melanocyte_Primary_Cells_skin01,H1_BMP4_Derived_Mesendoderm_Cultured_Cells,Psoas_Muscle	GI_INTESTINE,LUNG,MUSCLE,Mesendoderm,SKIN	A549_EtOH_0.02pct_Lung_Carcinoma_Cell_Line,Adipose_Derived_Mesenchymal_Stem_Cell_Cultured_Cells,Aorta,Bone_Marrow_Derived_Cultured_Mesenchymal_Stem_Cells,Breast_Myoepithelial_Primary_Cells,Colon_Smooth_Muscle,Foreskin_Fibroblast_Primary_Cells_skin01,Foreskin_Fibroblast_Primary_Cells_skin02,Foreskin_Keratinocyte_Primary_Cells_skin02,Foreskin_Keratinocyte_Primary_Cells_skin03,GM12878_Lymphoblastoid…	BLOOD,BONE,BRAIN,BREAST,CERVIX,FAT,GI_COLON,GI_RECTUM,GI_STOMACH,LUNG,MUSCLE,PLACENTA,SKIN,STROMAL_CONNECTIVE,STRONAL_CONNECTIVE,VASCULAR	A549_EtOH_0.02pct_Lung_Carcinoma_Cell_Line,Adipose_Nuclei,Bone_Marrow_Derived_Cultured_Mesenchymal_Stem_Cells,Brain_Cingulate_Gyrus,Brain_Dorsolateral_Prefrontal_Cortex,Brain_Hippocampus_Middle,Colon_Smooth_Muscle,Colonic_Mucosa,Duodenum_Smooth_Muscle,Esophagus,Fetal_Adrenal_Gland,Foreskin_Fibroblast_Primary_Cells_skin01,Foreskin_Fibroblast_Primary_Cells_skin02,Foreskin_Keratinocyte_Primary_Cells…	ADRENAL,BLOOD,BONE,BRAIN,BREAST,CERVIX,ENDODERM,ESC,FAT,GI_COLON,GI_DUODENUM,GI_ESOPHAGUS,GI_INTESTINE,GI_RECTUM,GI_STOMACH,HEART,LIVER,LUNG,MUSCLE,SKIN,STROMAL_CONNECTIVE,STRONAL_CONNECTIVE,THYMUS,Trophoblast	.	.	.		.	T	C	C	C	C	C/C,C/C	rs369285022	AF=0.000399361	0.336	0.328	0.64	0.79	0.714	0.013	291.9	2.04703e-13	5.156	0.126639	.	NXPH3,SPOP
chr17	47740511	47740512	SNP	4	TFBS,enhancer,openChrom,promoter	MYC	.	.	.	.	H1_BMP4_Derived_Trophoblast_Cultured_Cells	Trophoblast	Brain_Dorsolateral_Prefrontal_Cortex,Colonic_Mucosa,Rectal_Smooth_Muscle	BRAIN,GI_COLON,GI_RECTUM	Aorta,Brain_Inferior_Temporal_Lobe,Colonic_Mucosa,Foreskin_Fibroblast_Primary_Cells_skin01,H1_BMP4_Derived_Trophoblast_Cultured_Cells,Lung,Sigmoid_Colon,Small_Intestine	BRAIN,GI_COLON,GI_INTESTINE,LUNG,SKIN,Trophoblast,VASCULAR	.	.	.		.	A	T	T	T	T	T/T,T/T	rs370053820	AF=0.000199681	-0.742	-0.776	-0.773	0.005	0.004	0.005	.	.	0.304	0.048788	.	NXPH3,SPOP
chr17	47795144	47795145	SNP	4	enhancer,motif_alter,openChrom,promoter	.	.	MOTIFBR=DHS#NFKB_known11#47795145#47795158#-#13#0.255339#0.459748,DHS#NFKB_known11#47795145#47795158#+#1#0.195706#0.427820	.	.	Foreskin_Fibroblast_Primary_Cells_skin02,Primary_Natural_Killer_cells_from_peripheral_blood,Primary_T_cells_from_peripheral_blood,Primary_hematopoietic_stem_cells_G-CSF-mobilized_Female	BLOOD,SKIN	HSMM_Skeletal_Muscle_Myoblasts_Cells	MUSCLE	Brain_Anterior_Caudate,Fetal_Muscle_Leg,Fetal_Muscle_Trunk,Foreskin_Keratinocyte_Primary_Cells_skin03,HSMM_Skeletal_Muscle_Myoblasts_Cells,HSMM_cell_derived_Skeletal_Muscle_Myotubes_Cells,Pancreatic_Islets,Primary_Natural_Killer_cells_from_peripheral_blood,Primary_T_CD8+_memory_cells_from_peripheral_blood,Primary_T_cells_effector/memory_enriched_from_peripheral_blood,Primary_T_cells_from_peripher…	BLOOD,BRAIN,GI_STOMACH,HEART,MUSCLE,MUSCLE_LEG,PANCREAS,SKIN	.	.	.		.	A	G	G	G	G	G/G,G/G	rs570857941	AF=0.000399361	-2.54	-2.629	-0.375	0	0	0.001	.	.	0.961	0.099367	.	MYST2,SLC35B1
chr17	47825818	47825819	SNP	4	enhancer,motif_alter,openChrom,promoter	.	.	MOTIFBR=DHS#ETS_known10#47825808#47825825#+#12#0.020606#0.219936,DHS#ETV2_1#47825811#47825822#+#9#0.001688#0.713924	.	.	Fetal_Thymus,Primary_Natural_Killer_cells_from_peripheral_blood,Primary_T_cells_from_cord_blood,Primary_T_cells_from_peripheral_blood	BLOOD,THYMUS	Primary_T_CD8+_memory_cells_from_peripheral_blood,Primary_T_cells_effector/memory_enriched_from_peripheral_blood,Primary_T_helper_17_cells_PMA-I_stimulated,Primary_T_helper_cells_PMA-I_stimulated,Primary_T_helper_cells_from_peripheral_blood,Primary_T_helper_memory_cells_from_peripheral_blood_2,Primary_T_helper_naive_cells_from_peripheral_blood,Primary_hematopoietic_stem_cells_G-CSF-mobilized_Fema…	BLOOD,THYMUS	Colonic_Mucosa,Dnd41_TCell_Leukemia_Cell_Line,Fetal_Thymus,GM12878_Lymphoblastoid_Cells,Monocytes-CD14+_RO01746_Primary_Cells,Primary_B_cells_from_peripheral_blood,Primary_Natural_Killer_cells_from_peripheral_blood,Primary_T_CD8+_memory_cells_from_peripheral_blood,Primary_T_CD8+_naive_cells_from_peripheral_blood,Primary_T_cells_effector/memory_enriched_from_peripheral_blood,Primary_T_cells_from_p…	BLOOD,GI_COLON,GI_INTESTINE,GI_RECTUM,SPLEEN,THYMUS	.	.	.		.	A	C	C	C	C	C/C,C/C	rs567804805	AF=0.000399361	0.138	0.136	0.559	0	0	0.001	.	.	3.63	0.101703	.	MYST2,SLC35B1
chr17	47918973	47918974	SNP	4	TFBS,enhancer,motif_alter,promoter	CTCF	.	MOTIFBR=CTCF,DHS#REST_known4#47918964#47918985#+#11#0.077307#0.136534	.	.	.	.	Foreskin_Fibroblast_Primary_Cells_skin02	SKIN	HUES6_Cells,Monocytes-CD14+_RO01746_Primary_Cells	BLOOD,ESC	.	.	.		.	A	G	G	G	G	G/G,G/G	rs575372745	AF=0.000199681	0.051	0.245	-0.157	0	0.001	0.004	.	.	3.04	0.183328	.	MYST2,TAC4
chr17	74723308	74723309	SNP	4	TFBS,motif_alter,openChrom,promoter	BHLHE40,CBX3,CCNT2,CHD1,CTCF,CTCFL,EBF1,ELF1,ELK4,ETS1,FOXM1,FOXP2,GABPA,GATA1,GTF2F1,HDAC1,HDAC2,HMGN3,JUND,MAX,MAZ,MEF2A,MXI1,MYC,NFIC,NR2F2,NRF1,PAX5,PHF8,POLR2A,RAD21,RFX5,RUNX3,SIN3A,SIN3AK20,SMC3,TCF12,TCF3,USF1,ZBTB7A,ZNF143	.	MOTIFBR=BHLHE40,CCNT2,CTCF,CTCFL,DHS,EBF1,ELF1,ETS1,GABPA,GATA1,GTF2F1,HDAC2,HMGN3,MAX,MEF2A,MYC,NRF1,PAX5,RAD21,SIN3A,SMC3,TCF12,USF1,YY1,ZBTB7A,ZNF143#NR1H_3#74723292#74723309#-#0#0.105263#0.473684	.	.	Fetal_Adrenal_Gland,Fetal_Brain_Female,Fetal_Heart,Fetal_Intestine_Large,Fetal_Intestine_Small,Fetal_Kidney,Fetal_Lung,Fetal_Muscle_Leg,Fetal_Muscle_Trunk,Fetal_Stomach,Fetal_Thymus,Foreskin_Fibroblast_Primary_Cells_skin01,Foreskin_Fibroblast_Primary_Cells_skin02,Foreskin_Keratinocyte_Primary_Cells_skin02,Foreskin_Melanocyte_Primary_Cells_skin01,Gastric,H1_BMP4_Derived_Mesendoderm_Cultured_Cells,…	ADRENAL,BLOOD,BRAIN,ESC,GI_INTESTINE,GI_STOMACH,HEART,KIDNEY,LUNG,MUSCLE,MUSCLE_LEG,Mesendoderm,OVARY,PANCREAS,PLACENTA,SKIN,STROMAL_CONNECTIVE,THYMUS,iPSC	A549_EtOH_0.02pct_Lung_Carcinoma_Cell_Line,Adipose_Derived_Mesenchymal_Stem_Cell_Cultured_Cells,Adipose_Nuclei,Aorta,Bone_Marrow_Derived_Cultured_Mesenchymal_Stem_Cells,Brain_Angular_Gyrus,Brain_Anterior_Caudate,Brain_Cingulate_Gyrus,Brain_Dorsolateral_Prefrontal_Cortex,Brain_Germinal_Matrix,Brain_Hippocampus_Middle,Brain_Inferior_Temporal_Lobe,Brain_Substantia_Nigra,Breast_Myoepithelial_Primary_…	ADRENAL,BLOOD,BONE,BRAIN,BREAST,CERVIX,ENDODERM,ESC,FAT,GI_COLON,GI_DUODENUM,GI_ESOPHAGUS,GI_INTESTINE,GI_RECTUM,GI_STOMACH,HEART,KIDNEY,LIVER,LUNG,MUSCLE,MUSCLE_LEG,Mesendoderm,OVARY,PANCREAS,PLACENTA,SKIN,SPLEEN,STROMAL_CONNECTIVE,STRONAL_CONNECTIVE,THYMUS,Trophoblast,VASCULAR,iPSC	.	.	.	.	.		.	G	C	C	C	C	C/C,C/C	rs60180341	AF=0.0361422	0.516	0.736	-0.847	0.001	0.002	0.011	.	.	2.07	0	2b	C17orf95,JMJD6
chr17	74728931	74728932	SNP	4	TFBS,enhancer,motif_alter,promoter	PML,POLR2A,ZBTB33	.	MOTIFG=GATA_known12#74728929#74728934#-#2#4.839#0.542	.	.	.	.	A549_EtOH_0.02pct_Lung_Carcinoma_Cell_Line,Adipose_Derived_Mesenchymal_Stem_Cell_Cultured_Cells,Bone_Marrow_Derived_Cultured_Mesenchymal_Stem_Cells,Breast_Myoepithelial_Primary_Cells,GM12878_Lymphoblastoid_Cells,HeLa-S3_Cervical_Carcinoma_Cell_Line,Mesenchymal_Stem_Cell_Derived_Adipocyte_Cultured_Cells,Monocytes-CD14+_RO01746_Primary_Cells,iPS-20b_Cells	BLOOD,BREAST,CERVIX,FAT,LUNG,STRONAL_CONNECTIVE,iPSC	Adipose_Nuclei,Colon_Smooth_Muscle,Fetal_Thymus,Mesenchymal_Stem_Cell_Derived_Chondrocyte_Cultured_Cells,Monocytes-CD14+_RO01746_Primary_Cells,Primary_T_cells_effector/memory_enriched_from_peripheral_blood,Primary_T_regulatory_cells_from_peripheral_blood,Primary_hematopoietic_stem_cells_G-CSF-mobilized_Female	BLOOD,FAT,GI_COLON,STROMAL_CONNECTIVE,THYMUS	.	.	.		.	T	C	C	C	C	C/C,C/C	rs57510814	AF=0.0361422	-0.651	-0.691	-0.485	0.001	0.001	0.007	.	.	0.723	0.078958	4	MFSD11,SFRS2
chr17	74734176	74734177	SNP	4	TFBS,enhancer,openChrom,promoter	ARID3A,ATF3,BATF,BHLHE40,CEBPD,CHD2,E2F6,ELF1,ELK1,EP300,ETS1,FOS,FOSL2,FOXP2,GABPA,GTF2F1,HDAC1,HDAC2,HMGN3,IRF1,JUN,JUNB,JUND,KAP1,KDM5B,MAFK,MAX,MEF2A,MXI1,MYC,NR2C2,PAX5,POLR2A,RAD21,RBBP5,RCOR1,REST,RUNX3,SAP30,SIN3A,SIN3AK20,SIX5,SMC3,SP1,SP4,SREBP1,TAF1,TBP,TCF12,TCF3,TCF7L2,USF1,USF2,YY1,ZBTB33,ZBTB7A	.	.	.	.	Fetal_Intestine_Small,Ovary	GI_INTESTINE,OVARY	A549_EtOH_0.02pct_Lung_Carcinoma_Cell_Line,Adipose_Derived_Mesenchymal_Stem_Cell_Cultured_Cells,Adipose_Nuclei,Aorta,Bone_Marrow_Derived_Cultured_Mesenchymal_Stem_Cells,Brain_Angular_Gyrus,Brain_Anterior_Caudate,Brain_Cingulate_Gyrus,Brain_Dorsolateral_Prefrontal_Cortex,Brain_Germinal_Matrix,Brain_Hippocampus_Middle,Brain_Inferior_Temporal_Lobe,Brain_Substantia_Nigra,Breast_Myoepithelial_Primary_…	ADRENAL,BLOOD,BONE,BRAIN,BREAST,CERVIX,ENDODERM,ESC,FAT,GI_COLON,GI_DUODENUM,GI_ESOPHAGUS,GI_INTESTINE,GI_RECTUM,GI_STOMACH,HEART,KIDNEY,LIVER,LUNG,MUSCLE,MUSCLE_LEG,Mesendoderm,OVARY,PANCREAS,PLACENTA,SKIN,SPLEEN,STROMAL_CONNECTIVE,STRONAL_CONNECTIVE,THYMUS,Trophoblast,VASCULAR,iPSC	A549_EtOH_0.02pct_Lung_Carcinoma_Cell_Line,Adipose_Nuclei,Aorta,Bone_Marrow_Derived_Cultured_Mesenchymal_Stem_Cells,Brain_Angular_Gyrus,Brain_Anterior_Caudate,Brain_Cingulate_Gyrus,Brain_Dorsolateral_Prefrontal_Cortex,Brain_Hippocampus_Middle,Brain_Inferior_Temporal_Lobe,Brain_Substantia_Nigra,Colon_Smooth_Muscle,Colonic_Mucosa,Dnd41_TCell_Leukemia_Cell_Line,Duodenum_Smooth_Muscle,Esophagus,Fetal…	ADRENAL,BLOOD,BONE,BRAIN,BREAST,CERVIX,ENDODERM,ESC,FAT,GI_COLON,GI_DUODENUM,GI_ESOPHAGUS,GI_INTESTINE,GI_RECTUM,GI_STOMACH,HEART,LIVER,LUNG,MUSCLE,MUSCLE_LEG,Mesendoderm,OVARY,PANCREAS,PLACENTA,SKIN,SPLEEN,STROMAL_CONNECTIVE,STRONAL_CONNECTIVE,THYMUS,Trophoblast,VASCULAR,iPSC	.	.	.		.	A	G	G	G	G	G/G,G/G	rs73996694	AF=0.0359425	-0.768	-1.017	-0.823	0	0	0	.	.	3.947	0.08998	2b	MFSD11,SFRS2
chr17	74735341	74735342	SNP	4	eQTL,enhancer,openChrom,promoter	.	.	.	fibroblasts	.	Small_Intestine	GI_INTESTINE	A549_EtOH_0.02pct_Lung_Carcinoma_Cell_Line,Adipose_Derived_Mesenchymal_Stem_Cell_Cultured_Cells,Bone_Marrow_Derived_Cultured_Mesenchymal_Stem_Cells,Brain_Angular_Gyrus,Brain_Anterior_Caudate,Brain_Cingulate_Gyrus,Brain_Dorsolateral_Prefrontal_Cortex,Brain_Germinal_Matrix,Brain_Hippocampus_Middle,Brain_Inferior_Temporal_Lobe,Cortex_derived_primary_cultured_neurospheres,Dnd41_TCell_Leukemia_Cell_Li…	BLOOD,BONE,BRAIN,BREAST,CERVIX,ENDODERM,ESC,FAT,GI_DUODENUM,GI_INTESTINE,GI_RECTUM,HEART,LUNG,MUSCLE,MUSCLE_LEG,PANCREAS,SKIN,STROMAL_CONNECTIVE,STRONAL_CONNECTIVE,VASCULAR,iPSC	Brain_Anterior_Caudate,Dnd41_TCell_Leukemia_Cell_Line,Duodenum_Smooth_Muscle,Fetal_Adrenal_Gland,Fetal_Muscle_Trunk,GM12878_Lymphoblastoid_Cells,K562_Leukemia_Cells,Left_Ventricle,Skeletal_Muscle_Female	ADRENAL,BLOOD,BRAIN,GI_DUODENUM,HEART,MUSCLE	.	.	.		.	T	C	C	C	C	C/C,C/C	rs9897202	AF=0.066893	2.473	2.477	0.557	0.165	0.075	0.008	.	.	7.662	0.093295	5	MFSD11,SFRS2
chr17	76263626	76263627	SNC	4	TFBS,enhancer,motif_alter,openChrom	EGR1,EP300,RAD21	.	MOTIFBR=DHS,EP300,GATA1#HOXA4_2#76263613#76263630#-#3#0.081455#0.646453,DHS,EP300,GATA1#DBX2_1#76263614#76263630#-#3#0.221541#0.333699,DHS,EP300,GATA1#HNF1A_4#76263615#76263630#-#3#0.022804#0.858140,DHS,EP300,GATA1#HNF1B_4#76263615#76263630#-#3#0.019679#0.861344,DHS,EP300,GATA1#POU2F2_known13#76263615#76263637#+#13#0.006093#0.968731,DHS,EP300,GATA1#HNF1B_3#76263616#76263629#+#12#0.011701#0.888810…	.	.	Ovary	OVARY	.	.	Fetal_Thymus,K562_Leukemia_Cells,Primary_hematopoietic_stem_cells_G-CSF-mobilized_Female	BLOOD,THYMUS	.	.	.		.	A	T	T	T	T	T/T,T/T	.	0	1.235	0.744	0.375	1	0.999	0.116	336.8	1.29267e-70	8.979	0.074388	.	LOC283999,SOCS3
chr18	9961428	9961429	SNC	4	TFBS,enhancer,openChrom,promoter	BCL3	.	.	.	.	Primary_B_cells_from_peripheral_blood,Primary_hematopoietic_stem_cells_G-CSF-mobilized_Male	BLOOD	Mesenchymal_Stem_Cell_Derived_Adipocyte_Cultured_Cells	FAT	Brain_Angular_Gyrus,Brain_Anterior_Caudate,Brain_Cingulate_Gyrus,Brain_Dorsolateral_Prefrontal_Cortex,Brain_Hippocampus_Middle,HSMM_cell_derived_Skeletal_Muscle_Myotubes_Cells,Mesenchymal_Stem_Cell_Derived_Chondrocyte_Cultured_Cells	BRAIN,MUSCLE,STROMAL_CONNECTIVE	.	.	.		.	T	A	A	A	A	A/A,A/A	.	0	-1.384	-1.48	-1.168	0	0	0	.	.	1.573	0.060467	.	APCDD1,VAPA
chr18	19341466	19341467	SNP	4	TFBS,enhancer,openChrom,vista_enhancer_hs1650	YY1	.	.	.	vista_enhancer_hs1650	iPS_DF_19.11_Cells	iPSC	.	.	HUES64_Cells,Primary_T_helper_memory_cells_from_peripheral_blood_1	BLOOD,ESC	.	.	.		.	G	A	A	A	A	A/A,A/A	rs28430550	AF=0.0185703	0.022	-0.007	0.255	0.001	0.001	0.152	.	.	4.698	0.084033	5	GATA6,MIB1
chr18	19406229	19406230	SNP	4	TFBS,enhancer,openChrom,promoter	MYC	.	.	.	.	Fetal_Adrenal_Gland,H1_Derived_Mesenchymal_Stem_Cells	ADRENAL,STROMAL_CONNECTIVE	Adipose_Derived_Mesenchymal_Stem_Cell_Cultured_Cells,Fetal_Heart,Fetal_Muscle_Leg,HUVEC_Umbilical_Vein_Endothelial_Primary_Cells,Left_Ventricle,NHEK-Epidermal_Keratinocyte_Primary_Cells,Osteoblast_Primary_Cells,Right_Atrium,Stomach_Smooth_Muscle	BONE,GI_STOMACH,HEART,MUSCLE_LEG,SKIN,STRONAL_CONNECTIVE,VASCULAR	Adipose_Nuclei,Duodenum_Smooth_Muscle,Fetal_Adrenal_Gland,Fetal_Muscle_Leg,Fetal_Muscle_Trunk,Foreskin_Keratinocyte_Primary_Cells_skin03,Foreskin_Melanocyte_Primary_Cells_skin03,Gastric,HMEC_Mammary_Epithelial_Primary_Cells,HSMM_cell_derived_Skeletal_Muscle_Myotubes_Cells,HUVEC_Umbilical_Vein_Endothelial_Primary_Cells,Left_Ventricle,Mesenchymal_Stem_Cell_Derived_Chondrocyte_Cultured_Cells,NH-A_As…	ADRENAL,BONE,BRAIN,BREAST,ENDODERM,FAT,GI_DUODENUM,GI_INTESTINE,GI_STOMACH,HEART,MUSCLE,MUSCLE_LEG,PANCREAS,SKIN,STROMAL_CONNECTIVE,VASCULAR	.	.	.		.	C	T	T	T	T	T/T,T/T	rs9948906	AF=0.920327	1.529	1.014	0.473	0.269	0.019	0.014	385	4.16691e-38	.	0.093781	5	GATA6,MIB1
chr18	22810152	22810153	SNP	4	TFBS,motif_alter,openChrom,promoter	CEBPB	.	MOTIFBR=DHS#RREB1_1#22810146#22810160#+#8#0.181818#0.727273	.	.	H9_Cells,IMR90_fetal_lung_fibroblasts_Cell_Line,Primary_hematopoietic_stem_cells_G-CSF-mobilized_Female	BLOOD,ESC,LUNG	Sigmoid_Colon	GI_COLON	.	.	.	.	.		.	C	A	A	A	A	A/A,A/A	rs183173576	AF=0.00179712	0.307	0.26	0.53	0	0	0.002	.	.	7.452	0.108992	.	HRH4,ZNF521
chr18	22810222	22810223	SNP	4	TFBS,enhancer,openChrom,promoter	CEBPB	.	.	.	.	H9_Cells,Primary_hematopoietic_stem_cells_G-CSF-mobilized_Female	BLOOD,ESC	Mesenchymal_Stem_Cell_Derived_Chondrocyte_Cultured_Cells,Sigmoid_Colon	GI_COLON,STROMAL_CONNECTIVE	Adipose_Nuclei,Brain_Hippocampus_Middle,Colonic_Mucosa,Fetal_Adrenal_Gland,Fetal_Muscle_Leg,Fetal_Stomach,HUVEC_Umbilical_Vein_Endothelial_Primary_Cells,Mesenchymal_Stem_Cell_Derived_Chondrocyte_Cultured_Cells,Primary_hematopoietic_stem_cells_G-CSF-mobilized_Female,Rectal_Mucosa_Donor_31,Skeletal_Muscle_Female,Spleen	ADRENAL,BLOOD,BRAIN,FAT,GI_COLON,GI_RECTUM,GI_STOMACH,MUSCLE,MUSCLE_LEG,SPLEEN,STROMAL_CONNECTIVE,VASCULAR	.	.	.		.	A	T	T	T	T	T/T,T/T	rs187387840	AF=0.00179712	-0.026	0.09	-0.263	0	0.001	0.007	196.7	1.43894e-07	2.419	0.108992	.	HRH4,ZNF521
chr18	32240116	32240117	SNP	4	TFBS,eQTL,enhancer,promoter	ATF2,CHD1,CTBP2,EP300,KAP1,RBBP5,SP1	.	.	Thyroid	.	.	.	A549_EtOH_0.02pct_Lung_Carcinoma_Cell_Line,Adipose_Derived_Mesenchymal_Stem_Cell_Cultured_Cells,Bone_Marrow_Derived_Cultured_Mesenchymal_Stem_Cells,Brain_Angular_Gyrus,Brain_Anterior_Caudate,Brain_Cingulate_Gyrus,Brain_Hippocampus_Middle,Brain_Substantia_Nigra,Colon_Smooth_Muscle,Fetal_Heart,Foreskin_Fibroblast_Primary_Cells_skin01,Ganglion_Eminence_derived_primary_cultured_neurospheres,H1_Cells,…	BONE,BRAIN,ENDODERM,ESC,FAT,GI_COLON,GI_STOMACH,HEART,LUNG,SKIN,STROMAL_CONNECTIVE,STRONAL_CONNECTIVE,iPSC	Adipose_Nuclei,Aorta,Bone_Marrow_Derived_Cultured_Mesenchymal_Stem_Cells,Brain_Angular_Gyrus,Brain_Anterior_Caudate,Brain_Cingulate_Gyrus,Brain_Dorsolateral_Prefrontal_Cortex,Brain_Hippocampus_Middle,Brain_Inferior_Temporal_Lobe,Brain_Substantia_Nigra,Colon_Smooth_Muscle,Colonic_Mucosa,Duodenum_Smooth_Muscle,Esophagus,Fetal_Adrenal_Gland,Fetal_Intestine_Large,Fetal_Intestine_Small,Fetal_Muscle_Le…	ADRENAL,BONE,BRAIN,BREAST,CERVIX,ENDODERM,ESC,FAT,GI_COLON,GI_DUODENUM,GI_ESOPHAGUS,GI_INTESTINE,GI_RECTUM,GI_STOMACH,HEART,LUNG,MUSCLE,MUSCLE_LEG,Mesendoderm,SKIN,SPLEEN,STROMAL_CONNECTIVE,STRONAL_CONNECTIVE,THYMUS,Trophoblast,VASCULAR,iPSC	.	.	.		.	C	G	G	G	G	G/G,G/G	rs12956756	AF=0.086262	0.277	0.109	-0.803	0	0.001	0.01	.	.	3.82	0.108992	5	DTNA,NOL4
chr18	32277887	32277888	SNP	4	TFBS,enhancer,openChrom,promoter	KAP1,POLR2A	.	.	.	.	Psoas_Muscle	MUSCLE	Fetal_Thymus,HUES6_Cells,Spleen	ESC,SPLEEN,THYMUS	Foreskin_Fibroblast_Primary_Cells_skin01,H1_Cells,HMEC_Mammary_Epithelial_Primary_Cells,HUES48_Cells,Left_Ventricle,NH-A_Astrocytes_Primary_Cells,NHEK-Epidermal_Keratinocyte_Primary_Cells,hESC_Derived_CD56+_Mesoderm_Cultured_Cells	BRAIN,BREAST,ENDODERM,ESC,HEART,SKIN	.	.	.		.	T	A	A	A	A	A/A,A/A	rs73416450	AF=0.0275559	-1.383	-1.474	0.525	0	0	0.107	.	.	6.427	0.074898	5	DTNA,NOL4
chr18	32318575	32318576	SNP	4	TFBS,enhancer,openChrom,promoter	EP300,FOS,JUN,JUND,KAP1,MAFK,MAX,MYC,NR3C1,RCOR1,RFX5,USF2,ZNF263	.	.	.	.	Fetal_Muscle_Leg,H1_Derived_Mesenchymal_Stem_Cells	MUSCLE_LEG,STROMAL_CONNECTIVE	Colon_Smooth_Muscle,Fetal_Heart,Foreskin_Fibroblast_Primary_Cells_skin01,HeLa-S3_Cervical_Carcinoma_Cell_Line,Mesenchymal_Stem_Cell_Derived_Adipocyte_Cultured_Cells,Skeletal_Muscle_Female,Skeletal_Muscle_Male,Stomach_Smooth_Muscle	CERVIX,FAT,GI_COLON,GI_STOMACH,HEART,MUSCLE,SKIN	Brain_Angular_Gyrus,Brain_Anterior_Caudate,Brain_Cingulate_Gyrus,Brain_Hippocampus_Middle,Brain_Inferior_Temporal_Lobe,Fetal_Intestine_Large,H1_Derived_Mesenchymal_Stem_Cells,Left_Ventricle,NH-A_Astrocytes_Primary_Cells,Right_Atrium,Right_Ventricle,Skeletal_Muscle_Female,Stomach_Smooth_Muscle,hESC_Derived_CD56+_Mesoderm_Cultured_Cells	BRAIN,ENDODERM,GI_INTESTINE,GI_STOMACH,HEART,MUSCLE,STROMAL_CONNECTIVE	.	.	.		.	C	T	T	T	T	T/T,T/T	rs1842408	AF=0.0445288	0.215	0.198	-0.338	0.001	0.001	0.001	.	.	4.791	0.119485	4	DTNA,NOL4
chr18	60952740	60952741	SNP	4	TFBS,enhancer,openChrom,promoter	CHD2,EBF1,EP300,MAX,MAZ,MXI1,POLR2A,POU2F2,RELA,RUNX3,TAF1,TBP	.	.	.	.	Foreskin_Fibroblast_Primary_Cells_skin01,Primary_B_cells_from_peripheral_blood,Primary_T_cells_from_cord_blood	BLOOD,SKIN	GM12878_Lymphoblastoid_Cells,Stomach_Smooth_Muscle	BLOOD,GI_STOMACH	Brain_Anterior_Caudate,Brain_Inferior_Temporal_Lobe,Fetal_Muscle_Leg,Fetal_Stomach,GM12878_Lymphoblastoid_Cells,Primary_B_cells_from_peripheral_blood,Primary_T_helper_17_cells_PMA-I_stimulated,Sigmoid_Colon,Stomach_Smooth_Muscle,iPS-20b_Cells	BLOOD,BRAIN,GI_COLON,GI_STOMACH,MUSCLE_LEG,iPSC	.	.	.		.	C	T	T	T	T	T/T,T/T	rs114220999	AF=0.000998403	-2.332	-2.503	-0.278	0	0	0.004	.	.	4.486	0.225121	2b	BCL2,PHLPP1
chr19	5903382	5903383	SNC	4	TFBS,enhancer,motif_alter,openChrom	HDAC1,JUND,MAX,MYC,PHF8,POLR2A,TAF1,ZNF263	.	MOTIFG=SREBP_known3#5903383#5903390#+#1#8.589#4.194	.	.	H1_Derived_Mesenchymal_Stem_Cells,Ovary,Primary_Natural_Killer_cells_from_peripheral_blood	BLOOD,OVARY,STROMAL_CONNECTIVE	.	.	A549_EtOH_0.02pct_Lung_Carcinoma_Cell_Line,Adipose_Nuclei,Aorta,Bone_Marrow_Derived_Cultured_Mesenchymal_Stem_Cells,Brain_Angular_Gyrus,Brain_Anterior_Caudate,Brain_Cingulate_Gyrus,Brain_Dorsolateral_Prefrontal_Cortex,Brain_Hippocampus_Middle,Brain_Inferior_Temporal_Lobe,Brain_Substantia_Nigra,Colon_Smooth_Muscle,Colonic_Mucosa,Dnd41_TCell_Leukemia_Cell_Line,Duodenum_Smooth_Muscle,Esophagus,Fetal…	ADRENAL,BLOOD,BONE,BRAIN,BREAST,CERVIX,ENDODERM,ESC,FAT,GI_COLON,GI_DUODENUM,GI_ESOPHAGUS,GI_INTESTINE,GI_RECTUM,GI_STOMACH,HEART,LIVER,LUNG,MUSCLE,MUSCLE_LEG,OVARY,PLACENTA,SKIN,SPLEEN,STROMAL_CONNECTIVE,STRONAL_CONNECTIVE,THYMUS,Trophoblast,VASCULAR,iPSC	.	.	.	.	.	T	C	C	C	C	C/C,C/C	.	0	-0.512	-0.512	0.457	0	0	0.015	.	.	3.564	0.075627	.	NDUFA11,VMAC
chr19	5929951	5929952	SNC	4	TFBS,enhancer,openChrom,promoter	REST	.	.	.	.	Fetal_Heart,Fetal_Muscle_Trunk	HEART,MUSCLE	Foreskin_Fibroblast_Primary_Cells_skin02	SKIN	Colon_Smooth_Muscle,Fetal_Stomach,Foreskin_Fibroblast_Primary_Cells_skin02,Foreskin_Melanocyte_Primary_Cells_skin03,Rectal_Smooth_Muscle,Right_Ventricle,Stomach_Smooth_Muscle	GI_COLON,GI_RECTUM,GI_STOMACH,HEART,SKIN	.	.	.		.	C	G	G	G	G	G/G,G/G	.	0	-1.647	-1.744	-1.199	0	0	0.002	.	.	0.36	0.266198	.	CAPS,RANBP3
chr19	5932452	5932453	SNC	4	TFBS,enhancer,openChrom,promoter	CEBPB	.	.	.	.	Fetal_Kidney,Fetal_Lung	KIDNEY,LUNG	Foreskin_Fibroblast_Primary_Cells_skin02,H1_BMP4_Derived_Trophoblast_Cultured_Cells,Stomach_Smooth_Muscle	GI_STOMACH,SKIN,Trophoblast	Brain_Angular_Gyrus,Brain_Anterior_Caudate,Brain_Cingulate_Gyrus,Brain_Dorsolateral_Prefrontal_Cortex,Brain_Hippocampus_Middle,Colon_Smooth_Muscle,Fetal_Stomach,IMR90_fetal_lung_fibroblasts_Cell_Line,Lung,Rectal_Smooth_Muscle,Stomach_Smooth_Muscle,hESC_Derived_CD56+_Ectoderm_Cultured_Cells	BRAIN,ENDODERM,GI_COLON,GI_RECTUM,GI_STOMACH,LUNG	.	.	.		.	T	C	C	C	C	C/C,C/C	.	0	-0.72	-1.047	-0.146	0.001	0	0.49	.	.	10.7	0.256867	.	CAPS,RANBP3
chr19	5947437	5947438	SNP	4	TFBS,enhancer,openChrom,promoter	CEBPB,CTCF,MAFK	.	.	.	.	Fetal_Kidney,Fetal_Muscle_Trunk	KIDNEY,MUSCLE	Adipose_Derived_Mesenchymal_Stem_Cell_Cultured_Cells,Adipose_Nuclei,Bone_Marrow_Derived_Cultured_Mesenchymal_Stem_Cells,Brain_Angular_Gyrus,Brain_Anterior_Caudate,Brain_Cingulate_Gyrus,Brain_Dorsolateral_Prefrontal_Cortex,Brain_Hippocampus_Middle,Brain_Inferior_Temporal_Lobe,Brain_Substantia_Nigra,Colon_Smooth_Muscle,Cortex_derived_primary_cultured_neurospheres,Foreskin_Fibroblast_Primary_Cells_s…	BLOOD,BONE,BRAIN,FAT,GI_COLON,GI_RECTUM,GI_STOMACH,SKIN,STRONAL_CONNECTIVE	Bone_Marrow_Derived_Cultured_Mesenchymal_Stem_Cells,Brain_Angular_Gyrus,Brain_Anterior_Caudate,Brain_Cingulate_Gyrus,Brain_Dorsolateral_Prefrontal_Cortex,Brain_Hippocampus_Middle,Brain_Inferior_Temporal_Lobe,Brain_Substantia_Nigra,Colon_Smooth_Muscle,Colonic_Mucosa,Fetal_Adrenal_Gland,Fetal_Intestine_Large,Fetal_Intestine_Small,Fetal_Muscle_Leg,Fetal_Stomach,Foreskin_Melanocyte_Primary_Cells_skin…	ADRENAL,BLOOD,BONE,BRAIN,GI_COLON,GI_INTESTINE,GI_RECTUM,GI_STOMACH,HEART,LUNG,MUSCLE_LEG,PLACENTA,SKIN,SPLEEN,STROMAL_CONNECTIVE,STRONAL_CONNECTIVE	.	.	.		.	A	G	G	G	G	G/G,G/G	rs186931020	AF=0.00199681	-0.88	-0.889	-1.405	0	0	0	.	.	0.313	0.099367	.	CAPS,RANBP3
chr19	5975246	5975247	SNC	4	TFBS,enhancer,openChrom,promoter	ARID3A,HDAC2,HNF4A,HNF4G,MAX,MBD4,MXI1,MYBL2,NFIC,POLR2A,RELA,SIN3AK20,SP1,SRF	.	.	.	.	Fetal_Intestine_Small,Small_Intestine	GI_INTESTINE	Bone_Marrow_Derived_Cultured_Mesenchymal_Stem_Cells,Brain_Angular_Gyrus,Brain_Inferior_Temporal_Lobe,Colon_Smooth_Muscle,Fetal_Kidney,Foreskin_Fibroblast_Primary_Cells_skin01,Foreskin_Fibroblast_Primary_Cells_skin02,Foreskin_Melanocyte_Primary_Cells_skin01,GM12878_Lymphoblastoid_Cells,Mesenchymal_Stem_Cell_Derived_Chondrocyte_Cultured_Cells,Primary_T_CD8+_naive_cells_from_peripheral_blood,Primary…	BLOOD,BRAIN,GI_COLON,GI_RECTUM,KIDNEY,SKIN,STROMAL_CONNECTIVE,STRONAL_CONNECTIVE	Brain_Anterior_Caudate,Colon_Smooth_Muscle,Fetal_Adrenal_Gland,Fetal_Intestine_Large,Fetal_Intestine_Small,Fetal_Stomach,Fetal_Thymus,Foreskin_Fibroblast_Primary_Cells_skin01,Foreskin_Fibroblast_Primary_Cells_skin02,Foreskin_Melanocyte_Primary_Cells_skin03,GM12878_Lymphoblastoid_Cells,HepG2_Hepatocellular_Carcinoma_Cell_Line,Left_Ventricle,Lung,Mesenchymal_Stem_Cell_Derived_Chondrocyte_Cultured_C…	ADRENAL,BLOOD,BRAIN,GI_COLON,GI_INTESTINE,GI_RECTUM,GI_STOMACH,HEART,LIVER,LUNG,SKIN,SPLEEN,STROMAL_CONNECTIVE,THYMUS	.	.	.		.	A	G	G	G	G	G/G,G/G	.	0	-0.071	-0.102	-0.309	0	0	0.002	.	.	1.077	0.084033	.	CAPS,RANBP3
chr19	15393480	15393481	SNC	4	TFBS,enhancer,openChrom,promoter	FOS,MYC,STAT3	.	.	.	.	Placenta	PLACENTA	Brain_Anterior_Caudate,Duodenum_Smooth_Muscle,Primary_T_regulatory_cells_from_peripheral_blood	BLOOD,BRAIN,GI_DUODENUM	Adipose_Nuclei,Bone_Marrow_Derived_Cultured_Mesenchymal_Stem_Cells,Brain_Anterior_Caudate,Brain_Substantia_Nigra,Duodenum_Smooth_Muscle,Esophagus,Fetal_Stomach,Fetal_Thymus,Foreskin_Keratinocyte_Primary_Cells_skin03,GM12878_Lymphoblastoid_Cells,H1_BMP4_Derived_Trophoblast_Cultured_Cells,HMEC_Mammary_Epithelial_Primary_Cells,HSMM_cell_derived_Skeletal_Muscle_Myotubes_Cells,HUES6_Cells,HepG2_Hepato…	BLOOD,BONE,BRAIN,BREAST,ENDODERM,ESC,FAT,GI_DUODENUM,GI_ESOPHAGUS,GI_RECTUM,GI_STOMACH,LIVER,MUSCLE,PLACENTA,SKIN,STROMAL_CONNECTIVE,STRONAL_CONNECTIVE,THYMUS,Trophoblast	.	.	.		.	T	G	G	G	G	G/G,G/G	.	0	-0.582	-0.584	-2.012	0	0	0.038	.	.	0.512	0.048788	.	BRD4
chr19	15445175	15445176	SNC	4	TFBS,TFBS_motif,enhancer,promoter	EGR1,FOXM1,MTA3,RUNX3,SIN3A	EGR1	.	.	.	.	.	Monocytes-CD14+_RO01746_Primary_Cells,Primary_B_cells_from_peripheral_blood,Primary_hematopoietic_stem_cells_G-CSF-mobilized_Male,Primary_neutrophils_from_peripheral_blood	BLOOD	Colonic_Mucosa,Fetal_Thymus,Lung,Monocytes-CD14+_RO01746_Primary_Cells,Primary_B_cells_from_peripheral_blood,Primary_Natural_Killer_cells_from_peripheral_blood,Primary_hematopoietic_stem_cells_G-CSF-mobilized_Female,Primary_monocytes_from_peripheral_blood,Rectal_Mucosa_Donor_29,Sigmoid_Colon,Spleen,Thymus	BLOOD,GI_COLON,GI_RECTUM,LUNG,SPLEEN,THYMUS	.	.	.		.	G	C	C	C	C	C/C,C/C	.	0	0.672	0.661	0.467	0.129	0.098	0.018	.	.	0.939	0.046548	.	AKAP8,BRD4
chr19	42459835	42459836	SNP	4	DE_gene,TFBS,enhancer,promoter	EGR1	.	.	.	.	.	.	Foreskin_Fibroblast_Primary_Cells_skin01,Foreskin_Fibroblast_Primary_Cells_skin02,H1_Derived_Mesenchymal_Stem_Cells,iPS_DF_19.11_Cells	SKIN,STROMAL_CONNECTIVE,iPSC	Lung	LUNG	.	.	RABAC1	cerebellum	.	A	C	C	C	C	C/C,C/C	rs139587837	AF=0.0125799	-1.474	-1.652	-1.092	0	0	0.009	.	.	0.24	0.069865	.	ARHGEF1,RABAC1
chr19	42499262	42499263	SNP	4	TFBS,enhancer,openChrom,promoter	NFATC1,NFIC,STAT5A	.	.	.	.	Primary_T_cells_from_peripheral_blood	BLOOD	Brain_Angular_Gyrus,Brain_Cingulate_Gyrus,Brain_Dorsolateral_Prefrontal_Cortex,Brain_Hippocampus_Middle,Brain_Inferior_Temporal_Lobe,Fetal_Brain_Female,Foreskin_Fibroblast_Primary_Cells_skin02,H1_Derived_Neuronal_Progenitor_Cultured_Cells	BRAIN,SKIN	Brain_Angular_Gyrus,Brain_Anterior_Caudate,Brain_Cingulate_Gyrus,Brain_Dorsolateral_Prefrontal_Cortex,Brain_Inferior_Temporal_Lobe,Foreskin_Fibroblast_Primary_Cells_skin02	BRAIN,SKIN	.	.	.		.	G	A	A	A	A	A/A,A/A	rs534165631	AF=0.000199681	0.072	0.038	0.358	0	0	0.008	.	.	5.937	0.095506	.	ATP1A3
chr19	42538812	42538813	SNP	4	TFBS,enhancer,openChrom,promoter	EP300,KAP1	.	.	.	.	H9_Cells	ESC	A549_EtOH_0.02pct_Lung_Carcinoma_Cell_Line,Dnd41_TCell_Leukemia_Cell_Line,Duodenum_Mucosa,NHEK-Epidermal_Keratinocyte_Primary_Cells	BLOOD,GI_DUODENUM,LUNG,SKIN	Brain_Dorsolateral_Prefrontal_Cortex,Brain_Hippocampus_Middle,Dnd41_TCell_Leukemia_Cell_Line,hESC_Derived_CD56+_Ectoderm_Cultured_Cells,iPS-20b_Cells,iPS_DF_19.11_Cells	BLOOD,BRAIN,ENDODERM,iPSC	.	.	.		.	A	G	G	G	G	G/G,G/G	rs112070798	AF=0.014976	0.586	0.563	0.402	0.013	0.007	0.04	.	.	0.805	0	5	ATP1A3,GRIK5
chr19	42555749	42555750	SNP	4	TFBS,enhancer,openChrom,promoter	FOS,STAT3	.	.	.	.	Foreskin_Melanocyte_Primary_Cells_skin01,Gastric	GI_STOMACH,SKIN	Foreskin_Keratinocyte_Primary_Cells_skin03	SKIN	Esophagus,Gastric,HMEC_Mammary_Epithelial_Primary_Cells,NHEK-Epidermal_Keratinocyte_Primary_Cells	BREAST,GI_ESOPHAGUS,GI_STOMACH,SKIN	.	.	.		.	T	C	C	C	C	C/C,C/C	rs80180850	AF=0.00139776	0.283	0.292	-1.311	0.001	0.001	0	.	.	0.716	0	4	ATP1A3,GRIK5
chr19	42577122	42577123	SNP	4	DE_gene,enhancer,openChrom,promoter	.	.	.	.	.	H1_BMP4_Derived_Mesendoderm_Cultured_Cells,H1_Cells,Placenta	ESC,Mesendoderm,PLACENTA	Spleen	SPLEEN	H1_BMP4_Derived_Mesendoderm_Cultured_Cells,iPS_DF_19.11_Cells	Mesendoderm,iPSC	.	.	ZNF574	cerebellum	.	T	A	A	A	G	A/A,A/A	rs59748353	AF=0.0151757	0.231	0.237	-0.795	0.005	0.004	0.013	.	.	2.276	0.080785	5	ZNF574
chr19	42581074	42581075	SNC	4	DE_gene,TFBS,enhancer,promoter	SIN3AK20,SIX5	.	.	.	.	.	.	A549_EtOH_0.02pct_Lung_Carcinoma_Cell_Line,Adipose_Derived_Mesenchymal_Stem_Cell_Cultured_Cells,Adipose_Nuclei,Aorta,Bone_Marrow_Derived_Cultured_Mesenchymal_Stem_Cells,Brain_Angular_Gyrus,Brain_Anterior_Caudate,Brain_Cingulate_Gyrus,Brain_Dorsolateral_Prefrontal_Cortex,Brain_Germinal_Matrix,Brain_Hippocampus_Middle,Brain_Inferior_Temporal_Lobe,Brain_Substantia_Nigra,Breast_Myoepithelial_Primary_…	ADRENAL,BLOOD,BONE,BRAIN,BREAST,CERVIX,ENDODERM,ESC,FAT,GI_COLON,GI_DUODENUM,GI_ESOPHAGUS,GI_INTESTINE,GI_RECTUM,GI_STOMACH,HEART,KIDNEY,LIVER,LUNG,MUSCLE,MUSCLE_LEG,Mesendoderm,OVARY,PANCREAS,PLACENTA,SKIN,SPLEEN,STROMAL_CONNECTIVE,STRONAL_CONNECTIVE,THYMUS,Trophoblast,VASCULAR,iPSC	A549_EtOH_0.02pct_Lung_Carcinoma_Cell_Line,Adipose_Nuclei,Brain_Angular_Gyrus,Brain_Anterior_Caudate,Brain_Cingulate_Gyrus,Brain_Dorsolateral_Prefrontal_Cortex,Brain_Hippocampus_Middle,Brain_Inferior_Temporal_Lobe,Brain_Substantia_Nigra,Colon_Smooth_Muscle,Colonic_Mucosa,Dnd41_TCell_Leukemia_Cell_Line,Duodenum_Smooth_Muscle,Esophagus,Fetal_Muscle_Leg,Fetal_Stomach,Fetal_Thymus,Foreskin_Fibroblast…	BLOOD,BONE,BRAIN,BREAST,CERVIX,ESC,FAT,GI_COLON,GI_DUODENUM,GI_ESOPHAGUS,GI_INTESTINE,GI_RECTUM,GI_STOMACH,HEART,LIVER,LUNG,MUSCLE,MUSCLE_LEG,OVARY,PANCREAS,PLACENTA,SKIN,SPLEEN,STROMAL_CONNECTIVE,THYMUS,VASCULAR,iPSC	.	.	ZNF574	cerebellum	.	A	G	G	G	G	G/G,G/G	.	0	-0.079	-0.263	0.455	0	0	0.04	.	.	6.824	0.096616	5	ZNF574
chr19	42590560	42590561	SNC	4	DE_gene,TFBS,enhancer,promoter	POLR2A	.	.	.	.	.	.	H1_BMP4_Derived_Trophoblast_Cultured_Cells	Trophoblast	Brain_Cingulate_Gyrus,Foreskin_Fibroblast_Primary_Cells_skin01,Foreskin_Fibroblast_Primary_Cells_skin02,Monocytes-CD14+_RO01746_Primary_Cells,Stomach_Smooth_Muscle	BLOOD,BRAIN,GI_STOMACH,SKIN	.	.	ZNF574	cerebellum	.	C	T	T	T	T	T/T,T/T	.	0	-2.583	-2.739	-0.383	0	0	0.003	.	.	1.798	0.252514	.	POU2F2,ZNF574
chr19	46580752	46580753	SNP	4	TFBS,enhancer,openChrom,promoter	CCNT2,E2F1,EGR1,EZH2,MAX,MYC,NFYA,POLR2A,REST,SIN3AK20,TCF12	.	.	.	.	H1_Cells,H9_Cells	ESC	A549_EtOH_0.02pct_Lung_Carcinoma_Cell_Line,Adipose_Derived_Mesenchymal_Stem_Cell_Cultured_Cells,Bone_Marrow_Derived_Cultured_Mesenchymal_Stem_Cells,Brain_Angular_Gyrus,Brain_Anterior_Caudate,Brain_Cingulate_Gyrus,Brain_Dorsolateral_Prefrontal_Cortex,Brain_Germinal_Matrix,Brain_Hippocampus_Middle,Brain_Inferior_Temporal_Lobe,Brain_Substantia_Nigra,Breast_Myoepithelial_Primary_Cells,Breast_variant_…	ADRENAL,BLOOD,BONE,BRAIN,BREAST,CERVIX,ENDODERM,ESC,FAT,GI_COLON,GI_DUODENUM,GI_ESOPHAGUS,GI_INTESTINE,GI_RECTUM,GI_STOMACH,HEART,LIVER,LUNG,MUSCLE,MUSCLE_LEG,Mesendoderm,PANCREAS,SKIN,STROMAL_CONNECTIVE,STRONAL_CONNECTIVE,THYMUS,Trophoblast,VASCULAR,iPSC	A549_EtOH_0.02pct_Lung_Carcinoma_Cell_Line,Brain_Angular_Gyrus,Brain_Anterior_Caudate,Brain_Cingulate_Gyrus,Brain_Hippocampus_Middle,Brain_Inferior_Temporal_Lobe,Brain_Substantia_Nigra,Fetal_Muscle_Leg,Fetal_Muscle_Trunk,HepG2_Hepatocellular_Carcinoma_Cell_Line	BRAIN,LIVER,LUNG,MUSCLE,MUSCLE_LEG	.	.	.		.	T	C	C	C	C	C/C,C/C	rs142794878	AF=0.0091853	-0.017	-0.025	0.393	0	0	0.002	.	.	6.413	0.11394	.	IGFL3,IGFL4
chr19	46581153	46581154	SNP	4	TFBS,eQTL,enhancer,promoter	ARID3A,ATF3,CBX3,CCNT2,CREB1,CTCF,E2F1,ELF1,EP300,EZH2,FOSL2,JUND,MAX,MAZ,POLR2A,RAD21,SIN3AK20,SMC3,TAF7,TCF12,TEAD4,ZNF143	.	.	Skin_Sun_Exposed_Lower_leg	.	.	.	Brain_Cingulate_Gyrus,Brain_Inferior_Temporal_Lobe,Brain_Substantia_Nigra,Primary_T_cells_effector/memory_enriched_from_peripheral_blood,Rectal_Mucosa_Donor_29	BLOOD,BRAIN,GI_RECTUM	Brain_Angular_Gyrus,Brain_Anterior_Caudate,Brain_Inferior_Temporal_Lobe	BRAIN	.	.	.		.	C	T	T	T	T	T/T,T/T	rs2041989	AF=0.096845	0.51	0.487	0.329	0.159	0.115	0.106	.	.	7.752	0.166803	3a	IGFL3,IGFL4
chr19	46582451	46582452	SNP	4	TFBS,enhancer,openChrom,promoter	SETDB1	.	.	.	.	Fetal_Brain_Female,Fetal_Brain_Male,Fetal_Heart,Foreskin_Fibroblast_Primary_Cells_skin01,Foreskin_Keratinocyte_Primary_Cells_skin02	BRAIN,HEART,SKIN	Adipose_Derived_Mesenchymal_Stem_Cell_Cultured_Cells,Brain_Angular_Gyrus,Brain_Anterior_Caudate,Brain_Cingulate_Gyrus,Brain_Dorsolateral_Prefrontal_Cortex,Brain_Germinal_Matrix,Brain_Hippocampus_Middle,Brain_Inferior_Temporal_Lobe,Brain_Substantia_Nigra,Colon_Smooth_Muscle,Cortex_derived_primary_cultured_neurospheres,Esophagus,Fetal_Brain_Female,Foreskin_Fibroblast_Primary_Cells_skin01,Foreskin_F…	BRAIN,FAT,GI_COLON,GI_ESOPHAGUS,GI_RECTUM,SKIN,STROMAL_CONNECTIVE,STRONAL_CONNECTIVE	Brain_Angular_Gyrus,Brain_Anterior_Caudate,Brain_Cingulate_Gyrus,Brain_Dorsolateral_Prefrontal_Cortex,Brain_Hippocampus_Middle,Brain_Inferior_Temporal_Lobe,Brain_Substantia_Nigra,Colon_Smooth_Muscle,Fetal_Adrenal_Gland,Fetal_Intestine_Large,Fetal_Intestine_Small,Fetal_Stomach,Fetal_Thymus,Foreskin_Keratinocyte_Primary_Cells_skin03,NHEK-Epidermal_Keratinocyte_Primary_Cells,Rectal_Mucosa_Donor_31,R…	ADRENAL,BRAIN,GI_COLON,GI_INTESTINE,GI_RECTUM,GI_STOMACH,SKIN,THYMUS	.	.	.		.	T	C	C	C	C	C/C,C/C	rs16980291	AF=0.0091853	-0.874	-0.801	0.198	0	0	0.002	.	.	2.068	0.11394	4	IGFL3,IGFL4
chr19	46613291	46613292	SNP	4	eQTL,enhancer,openChrom,promoter	.	.	.	Lung,Skin_Sun_Exposed_Lower_leg	.	Foreskin_Keratinocyte_Primary_Cells_skin02,Foreskin_Melanocyte_Primary_Cells_skin01,H1_BMP4_Derived_Trophoblast_Cultured_Cells,Placenta	PLACENTA,SKIN,Trophoblast	hESC_Derived_CD56+_Ectoderm_Cultured_Cells	ENDODERM	Foreskin_Keratinocyte_Primary_Cells_skin03,NHEK-Epidermal_Keratinocyte_Primary_Cells	SKIN	.	.	.		.	T	C	C	C	C	C/C,C/C	rs79829678	AF=0.0271565	0.182	0.175	0.178	0.006	0.005	0.005	.	.	0.797	0.06567	5	IGFL3,IGFL4
chr2	9379143	9379144	SNP	4	TFBS,enhancer,openChrom,promoter	EP300,RAD21,REST	.	.	.	.	Fetal_Kidney,Fetal_Lung,Fetal_Muscle_Trunk,Foreskin_Fibroblast_Primary_Cells_skin02,Foreskin_Melanocyte_Primary_Cells_skin01,H1_Derived_Mesenchymal_Stem_Cells,Ovary	KIDNEY,LUNG,MUSCLE,OVARY,SKIN,STROMAL_CONNECTIVE	Adipose_Derived_Mesenchymal_Stem_Cell_Cultured_Cells,Fetal_Brain_Female,Foreskin_Fibroblast_Primary_Cells_skin01,Foreskin_Fibroblast_Primary_Cells_skin02,Lung,Muscle_Satellite_Cultured_Cells,Stomach_Smooth_Muscle	BRAIN,GI_STOMACH,LUNG,MUSCLE,SKIN,STRONAL_CONNECTIVE	Adipose_Nuclei,Aorta,Brain_Angular_Gyrus,Brain_Anterior_Caudate,Brain_Dorsolateral_Prefrontal_Cortex,Brain_Hippocampus_Middle,Duodenum_Smooth_Muscle,Fetal_Adrenal_Gland,Fetal_Muscle_Leg,Fetal_Muscle_Trunk,Foreskin_Fibroblast_Primary_Cells_skin01,Foreskin_Fibroblast_Primary_Cells_skin02,Foreskin_Melanocyte_Primary_Cells_skin03,HSMM_Skeletal_Muscle_Myoblasts_Cells,HSMM_cell_derived_Skeletal_Muscle_…	ADRENAL,BLOOD,BRAIN,ENDODERM,FAT,GI_COLON,GI_DUODENUM,HEART,LUNG,MUSCLE,MUSCLE_LEG,OVARY,PLACENTA,SKIN,VASCULAR	.	.	.		.	A	G	G	G	G	G/G,G/G	rs116193316	AF=0.00539137	-1.626	-1.676	-0.437	0	0	0.001	.	.	1.565	0.078448	4	ASAP2,ITGB1BP1
chr2	63017140	63017141	SNP	4	TFBS,enhancer,openChrom,promoter	TCF7L2	.	.	.	.	Gastric	GI_STOMACH	A549_EtOH_0.02pct_Lung_Carcinoma_Cell_Line,Mesenchymal_Stem_Cell_Derived_Adipocyte_Cultured_Cells,Primary_T_helper_memory_cells_from_peripheral_blood_1	BLOOD,FAT,LUNG	A549_EtOH_0.02pct_Lung_Carcinoma_Cell_Line,Adipose_Nuclei,Brain_Dorsolateral_Prefrontal_Cortex,Brain_Inferior_Temporal_Lobe,Liver,iPS-20b_Cells	BRAIN,FAT,LIVER,LUNG,iPSC	.	.	.		.	T	C	C	C	C	C/C,C/C	rs146634113	AF=0.000798722	-0.131	-0.165	-0.144	0	0	0.007	1583	2.35778e-123	0.505	0.078448	.	EHBP1,OTX1
chr2	63286698	63286699	SNC	4	TFBS,motif_alter,openChrom,promoter	EZH2,MAX,SUZ12	.	MOTIFBR=DHS,MAX,SUZ12#WT1_1#63286692#63286701#-#2#0.045455#0.500000	.	.	H1_Cells,iPS_DF_6.9_Cells	ESC,iPSC	A549_EtOH_0.02pct_Lung_Carcinoma_Cell_Line,Adipose_Nuclei,Brain_Hippocampus_Middle,Colon_Smooth_Muscle,Colonic_Mucosa,Duodenum_Smooth_Muscle,Esophagus,Foreskin_Fibroblast_Primary_Cells_skin01,Foreskin_Keratinocyte_Primary_Cells_skin02,Foreskin_Keratinocyte_Primary_Cells_skin03,H1_Cells,H9_Cells,H9_Derived_Neuron_Cultured_Cells,HSMM_Skeletal_Muscle_Myoblasts_Cells,HSMM_cell_derived_Skeletal_Muscle…	BLOOD,BRAIN,ENDODERM,ESC,FAT,GI_COLON,GI_DUODENUM,GI_ESOPHAGUS,HEART,LUNG,MUSCLE,OVARY,SKIN,iPSC	.	.	.	.	.		.	G	A	A	A	A	A/A,A/A	.	0	-0.332	-0.62	0.381	0	0	0.008	.	.	7.729	0.166803	.	MDH1,OTX1
chr2	71505105	71505106	SNC	4	TFBS,enhancer,openChrom,promoter	KAP1,POLR2A,TCF7L2	.	.	.	.	Fetal_Heart,Primary_hematopoietic_stem_cells_G-CSF-mobilized_Female	BLOOD,HEART	A549_EtOH_0.02pct_Lung_Carcinoma_Cell_Line,Adipose_Derived_Mesenchymal_Stem_Cell_Cultured_Cells,Adipose_Nuclei,Aorta,Bone_Marrow_Derived_Cultured_Mesenchymal_Stem_Cells,Brain_Angular_Gyrus,Brain_Anterior_Caudate,Brain_Cingulate_Gyrus,Brain_Dorsolateral_Prefrontal_Cortex,Brain_Germinal_Matrix,Brain_Hippocampus_Middle,Brain_Inferior_Temporal_Lobe,Brain_Substantia_Nigra,Breast_Myoepithelial_Primary_…	BLOOD,BONE,BRAIN,BREAST,CERVIX,ENDODERM,ESC,FAT,GI_COLON,GI_DUODENUM,GI_RECTUM,GI_STOMACH,HEART,LIVER,LUNG,MUSCLE,MUSCLE_LEG,Mesendoderm,SKIN,STROMAL_CONNECTIVE,STRONAL_CONNECTIVE,VASCULAR,iPSC	Brain_Angular_Gyrus,Brain_Anterior_Caudate,Brain_Cingulate_Gyrus,Brain_Dorsolateral_Prefrontal_Cortex,Brain_Hippocampus_Middle,Brain_Inferior_Temporal_Lobe,Brain_Substantia_Nigra,Fetal_Muscle_Leg,Fetal_Stomach,Foreskin_Fibroblast_Primary_Cells_skin02,H1_BMP4_Derived_Mesendoderm_Cultured_Cells,HSMM_cell_derived_Skeletal_Muscle_Myotubes_Cells,HUES48_Cells,HeLa-S3_Cervical_Carcinoma_Cell_Line,Left_V…	BRAIN,CERVIX,ESC,GI_INTESTINE,GI_STOMACH,HEART,LIVER,MUSCLE,MUSCLE_LEG,Mesendoderm,SKIN,SPLEEN	.	.	.		.	A	G	G	G	G	G/G,G/G	.	0	-0.38	-0.367	-1.236	0	0	0	.	.	4.088	0.166803	.	PAIP2B,ZNF638
chr2	95678751	95678752	indel	4	DE_gene,enhancer,openChrom,promoter	.	.	.	.	.	Breast_variant_Human_Mammary_Epithelial_Cells_(vHMEC),Foreskin_Fibroblast_Primary_Cells_skin01,Foreskin_Keratinocyte_Primary_Cells_skin02,Foreskin_Melanocyte_Primary_Cells_skin01	BREAST,SKIN	Foreskin_Melanocyte_Primary_Cells_skin03	SKIN	Brain_Angular_Gyrus,Brain_Cingulate_Gyrus,Brain_Dorsolateral_Prefrontal_Cortex,Brain_Hippocampus_Middle,Brain_Inferior_Temporal_Lobe,Brain_Substantia_Nigra,Fetal_Thymus,Thymus	BRAIN,THYMUS	.	.	MAL	kidney	.	A	AT	AT	AT	AT	AT/AT,AT/AT	.	0	0.126	0.093	0.457	0	0	0.003	.	.	0.033	0.119485	.	MAL,TEKT4
chr2	95687923	95687924	SNC	4	DE_gene,enhancer,motif_alter,promoter	.	.	MOTIFBR=DHS#TCF7L2_known4#95687918#95687928#+#7#0.043478#0.913043	.	.	.	.	Brain_Hippocampus_Middle,Brain_Inferior_Temporal_Lobe,Fetal_Thymus,Stomach_Smooth_Muscle	BRAIN,GI_STOMACH,THYMUS	Brain_Angular_Gyrus,Brain_Anterior_Caudate,Brain_Cingulate_Gyrus,Brain_Dorsolateral_Prefrontal_Cortex,Brain_Hippocampus_Middle,Brain_Inferior_Temporal_Lobe,Brain_Substantia_Nigra,Colonic_Mucosa,Esophagus,Fetal_Thymus,Primary_T_helper_cells_PMA-I_stimulated,Primary_T_helper_naive_cells_from_peripheral_blood,Stomach_Smooth_Muscle,hESC_Derived_CD56+_Ectoderm_Cultured_Cells	BLOOD,BRAIN,ENDODERM,GI_COLON,GI_ESOPHAGUS,GI_STOMACH,THYMUS	.	.	MAL	kidney	.	A	G	G	G	G	G/G,G/G	.	0	-3.374	-3.491	-1.585	0	0	0.001	.	.	0.176	0.095506	.	MAL
chr2	95698217	95698218	indel	4	DE_gene,enhancer,motif_alter,promoter	.	.	MOTIFBR=DHS#NR1H_3#95698206#95698223#-	.	.	.	.	Brain_Hippocampus_Middle,Brain_Substantia_Nigra	BRAIN	Brain_Angular_Gyrus,Brain_Anterior_Caudate,Brain_Cingulate_Gyrus,Brain_Dorsolateral_Prefrontal_Cortex,Brain_Hippocampus_Middle,Brain_Inferior_Temporal_Lobe,Brain_Substantia_Nigra,Esophagus,Placenta,Primary_T_helper_cells_PMA-I_stimulated,Primary_T_helper_cells_from_peripheral_blood,Primary_T_helper_memory_cells_from_peripheral_blood_1,Primary_T_helper_naive_cells_from_peripheral_blood	BLOOD,BRAIN,GI_ESOPHAGUS,PLACENTA	.	.	MAL	kidney	.	C	CT	CT	CT	CT	CT/CT,CT/CT	rs112945696	AF=0.00479233	0.429	0.404	0.604	0.063	0.049	0.268	.	.	9.339	0.078448	5	MAL,MRPS5
chr2	95708626	95708627	SNC	4	DE_gene,TFBS,enhancer,openChrom	CTCF,EBF1,ESR1,NR3C1	.	.	.	.	Fetal_Stomach,Gastric	GI_STOMACH	.	.	Brain_Angular_Gyrus,Brain_Anterior_Caudate,Brain_Cingulate_Gyrus,Brain_Dorsolateral_Prefrontal_Cortex,Brain_Hippocampus_Middle,Brain_Inferior_Temporal_Lobe,Brain_Substantia_Nigra,Esophagus,Fetal_Muscle_Leg,Fetal_Muscle_Trunk,Fetal_Stomach,GM12878_Lymphoblastoid_Cells,Gastric,HSMM_Skeletal_Muscle_Myoblasts_Cells,HSMM_cell_derived_Skeletal_Muscle_Myotubes_Cells,IMR90_fetal_lung_fibroblasts_Cell_Lin…	BLOOD,BRAIN,ENDODERM,GI_ESOPHAGUS,GI_STOMACH,LUNG,MUSCLE,MUSCLE_LEG	.	.	MAL	kidney	.	A	T	T	T	T	T/T,T/T	.	0	2.2	2.127	0.525	0.991	0.99	0.541	28.3	4.93e-07	16.07	0.101703	.	MAL,MRPS5
chr2	95728492	95728493	SNC	4	DE_gene,TFBS,enhancer,openChrom	CTCF	.	.	.	.	Fetal_Thymus	THYMUS	.	.	Brain_Angular_Gyrus,Brain_Anterior_Caudate,Brain_Cingulate_Gyrus,Brain_Hippocampus_Middle,Brain_Inferior_Temporal_Lobe,Brain_Substantia_Nigra,Dnd41_TCell_Leukemia_Cell_Line,Esophagus,Fetal_Stomach,Fetal_Thymus,GM12878_Lymphoblastoid_Cells,Primary_T_cells_from_peripheral_blood,Primary_T_helper_cells_PMA-I_stimulated,Primary_T_helper_cells_from_peripheral_blood,Primary_T_helper_naive_cells_from_per…	BLOOD,BRAIN,GI_ESOPHAGUS,GI_STOMACH,THYMUS	.	.	MAL	kidney	.	G	A	A	A	A	A/A,A/A	.	0	0.589	0.56	0.249	0.012	0.009	0.009	.	.	4.073	0.108992	.	MAL,MRPS5
chr2	95744787	95744788	SNC	4	DE_gene,enhancer,openChrom,promoter	.	.	.	.	.	Gastric,Small_Intestine	GI_INTESTINE,GI_STOMACH	iPS-20b_Cells	iPSC	Brain_Anterior_Caudate,Brain_Hippocampus_Middle,Brain_Inferior_Temporal_Lobe,Brain_Substantia_Nigra,Fetal_Thymus,Primary_T_cells_from_peripheral_blood,Primary_T_helper_cells_PMA-I_stimulated,Primary_T_helper_cells_from_peripheral_blood	BLOOD,BRAIN,THYMUS	.	.	MAL	kidney	.	C	G	G	G	G	G/G,G/G	.	0	-0.65	-0.678	-1.334	0.005	0.003	0.012	.	.	0.26	0.074388	.	MAL,MRPS5
chr2	95786504	95786505	SNC	4	DE_gene,TFBS,enhancer,promoter	RCOR1	.	.	.	.	.	.	A549_EtOH_0.02pct_Lung_Carcinoma_Cell_Line,Adipose_Derived_Mesenchymal_Stem_Cell_Cultured_Cells,Adipose_Nuclei,Bone_Marrow_Derived_Cultured_Mesenchymal_Stem_Cells,Brain_Angular_Gyrus,Brain_Anterior_Caudate,Brain_Cingulate_Gyrus,Brain_Dorsolateral_Prefrontal_Cortex,Brain_Germinal_Matrix,Brain_Hippocampus_Middle,Brain_Inferior_Temporal_Lobe,Breast_Myoepithelial_Primary_Cells,Breast_variant_Human_Ma…	ADRENAL,BLOOD,BONE,BRAIN,BREAST,CERVIX,ENDODERM,ESC,FAT,GI_COLON,GI_DUODENUM,GI_ESOPHAGUS,GI_RECTUM,GI_STOMACH,HEART,KIDNEY,LIVER,LUNG,MUSCLE,PANCREAS,SKIN,STROMAL_CONNECTIVE,STRONAL_CONNECTIVE,VASCULAR,iPSC	Dnd41_TCell_Leukemia_Cell_Line,Foreskin_Fibroblast_Primary_Cells_skin01,Foreskin_Fibroblast_Primary_Cells_skin02,K562_Leukemia_Cells,Liver,Primary_T_helper_17_cells_PMA-I_stimulated,Primary_T_helper_cells_PMA-I_stimulated	BLOOD,LIVER,SKIN	.	.	MAL	kidney	.	T	G	G	G	G	G/G,G/G	.	0	-0.284	-0.303	-0.956	0	0	0	.	.	2.317	0.093295	.	MAL,MRPS5
chr2	137926125	137926126	SNP	4	TFBS,eQTL,enhancer,promoter	GATA2,GATA3,TCF7L2,ZNF217	.	.	fibroblasts	.	.	.	NHEK-Epidermal_Keratinocyte_Primary_Cells	SKIN	Esophagus,HMEC_Mammary_Epithelial_Primary_Cells,NHEK-Epidermal_Keratinocyte_Primary_Cells	BREAST,GI_ESOPHAGUS,SKIN	.	.	.		.	G	T	T	T	T	T/T,T/T	rs12997500	AF=0.0503195	0.755	0.511	0.53	0.803	0.896	0.966	548.2	4.92967e-76	15.01	0.061011	5	HNMT,THSD7B
chr2	137926502	137926503	SNP	4	TFBS,eQTL,enhancer,promoter	GATA2,GATA3,TCF7L2,ZNF217	.	.	fibroblasts	.	.	.	Mesenchymal_Stem_Cell_Derived_Adipocyte_Cultured_Cells,NHEK-Epidermal_Keratinocyte_Primary_Cells	FAT,SKIN	NHEK-Epidermal_Keratinocyte_Primary_Cells	SKIN	.	.	.		.	C	G	G	G	G	G/G,G/G	rs35260924	AF=0.0503195	0.328	0.332	-0.851	0	0	0	.	.	1.71	0.061011	4	HNMT,THSD7B
chr2	137931185	137931186	SNP	4	TFBS,eQTL,enhancer,openChrom	BATF,BCL11A,CTCF,EBF1,EP300,IRF4,NFIC,PAX5,RAD21,RUNX3,STAT3,WRNIP1	.	.	fibroblasts	.	Fetal_Adrenal_Gland,Fetal_Intestine_Large,Fetal_Intestine_Small,Foreskin_Fibroblast_Primary_Cells_skin01,Foreskin_Fibroblast_Primary_Cells_skin02,H1_Derived_Mesenchymal_Stem_Cells,iPS_DF_19.11_Cells,iPS_DF_6.9_Cells	ADRENAL,GI_INTESTINE,SKIN,STROMAL_CONNECTIVE,iPSC	.	.	Fetal_Intestine_Large,Fetal_Intestine_Small,H1_Derived_Mesenchymal_Stem_Cells,Mesenchymal_Stem_Cell_Derived_Chondrocyte_Cultured_Cells	GI_INTESTINE,STROMAL_CONNECTIVE	.	.	.		.	T	G	G	G	G	G/G,G/G	rs12105849	AF=0.0569089	-0.189	-0.069	0.651	0	0	0.007	.	.	3.74	0.049104	4	HNMT,THSD7B
chr2	137935985	137935986	SNP	4	eQTL,enhancer,motif_alter,promoter	.	.	MOTIFBR=DHS#DMRT3_1#137935983#137935998#-#12#0.000000#0.650000,DHS#DMRT2_1#137935983#137935999#-#13#0.000000#0.722222	fibroblasts	.	.	.	Mesenchymal_Stem_Cell_Derived_Adipocyte_Cultured_Cells,Monocytes-CD14+_RO01746_Primary_Cells	BLOOD,FAT	Foreskin_Keratinocyte_Primary_Cells_skin03,Mesenchymal_Stem_Cell_Derived_Chondrocyte_Cultured_Cells,Monocytes-CD14+_RO01746_Primary_Cells,NHEK-Epidermal_Keratinocyte_Primary_Cells	BLOOD,SKIN,STROMAL_CONNECTIVE	.	.	.		.	A	G	G	G	G	G/G,G/G	rs34712067	AF=0.0569089	-0.459	-0.366	0.651	0.003	0.019	0.464	1534.8	1.81323e-169	8.392	0.053691	5	HNMT,THSD7B
chr2	211683465	211683466	SNP	4	TFBS,enhancer,openChrom,promoter	USF1	.	.	.	.	Foreskin_Keratinocyte_Primary_Cells_skin02,H1_BMP4_Derived_Mesendoderm_Cultured_Cells,iPS_DF_6.9_Cells	Mesendoderm,SKIN,iPSC	Brain_Anterior_Caudate,Liver	BRAIN,LIVER	iPS-20b_Cells	iPSC	.	.	.		.	T	C	C	C	C	C/C,C/C	rs183758504	AF=0.00599042	-0.42	-0.423	-0.261	0	0	0	.	.	1.405	0.061011	.	CPS1
chr2	211683466	211683467	SNP	4	TFBS,enhancer,openChrom,promoter	USF1	.	.	.	.	Foreskin_Keratinocyte_Primary_Cells_skin02,H1_BMP4_Derived_Mesendoderm_Cultured_Cells,iPS_DF_6.9_Cells	Mesendoderm,SKIN,iPSC	Brain_Anterior_Caudate,Liver	BRAIN,LIVER	iPS-20b_Cells	iPSC	.	.	.		.	T	C	C	C	C	C/C,C/C	rs183758504	AF=0.00599042	-0.42	-0.423	-0.261	0	0	0	.	.	.	0.061011	.	CPS1
chr2	213009921	213009922	SNP	4	TFBS,enhancer,openChrom,promoter	CEBPB,FOS	.	.	.	.	Foreskin_Keratinocyte_Primary_Cells_skin02,Foreskin_Melanocyte_Primary_Cells_skin01,H1_Derived_Mesenchymal_Stem_Cells,IMR90_fetal_lung_fibroblasts_Cell_Line	LUNG,SKIN,STROMAL_CONNECTIVE	Mesenchymal_Stem_Cell_Derived_Chondrocyte_Cultured_Cells	STROMAL_CONNECTIVE	Bone_Marrow_Derived_Cultured_Mesenchymal_Stem_Cells,Fetal_Intestine_Large,HSMM_cell_derived_Skeletal_Muscle_Myotubes_Cells,Mesenchymal_Stem_Cell_Derived_Chondrocyte_Cultured_Cells,Osteoblast_Primary_Cells	BONE,GI_INTESTINE,MUSCLE,STROMAL_CONNECTIVE,STRONAL_CONNECTIVE	.	.	.		.	T	C	C	C	C	C/C,C/C	rs77415604	AF=0.0886581	0.422	0.416	0.486	0	0	0.048	.	.	4.079	0.061011	5	ERBB4
chr2	213805536	213805537	SNP	4	DE_gene,TFBS,enhancer,promoter	KAP1,RBBP5,ZNF263	.	.	.	.	.	.	iPS-18_Cells,iPS-20b_Cells	iPSC	H1_Cells,HMEC_Mammary_Epithelial_Primary_Cells,HUES48_Cells,NHEK-Epidermal_Keratinocyte_Primary_Cells,Pancreatic_Islets,Rectal_Mucosa_Donor_31,iPS-20b_Cells	BREAST,ESC,GI_RECTUM,PANCREAS,SKIN,iPSC	.	.	IKZF2	kidney	.	T	C	C	C	C	C/C,C/C	rs76889174	AF=0.0117812	0.077	0.042	-0.297	0.001	0.001	0.001	.	.	1.265	0.119485	4	ERBB4,IKZF2
chr2	213811679	213811680	SNC	4	DE_gene,enhancer,motif_alter,openChrom	.	.	MOTIFBR=DHS#RARB_4#213811672#213811688#+#9#0.000000#0.900000,DHS#ATF3_known10#213811680#213811691#-#11#0.000000#0.111111	.	.	Fetal_Adrenal_Gland	ADRENAL	.	.	Primary_T_regulatory_cells_from_peripheral_blood,hESC_Derived_CD184+_Endoderm_Cultured_Cells	BLOOD,ENDODERM	.	.	IKZF2	kidney	.	A	G	G	G	G	G/G,G/G	.	0	0.066	0.053	0.559	0	0	0.043	.	.	4.39	0.099367	.	ERBB4,IKZF2
chr2	213814979	213814980	SNC	4	DE_gene,TFBS,enhancer,promoter	EBF1	.	.	.	.	.	.	Adipose_Derived_Mesenchymal_Stem_Cell_Cultured_Cells,Mesenchymal_Stem_Cell_Derived_Adipocyte_Cultured_Cells	FAT,STRONAL_CONNECTIVE	Adipose_Nuclei,Bone_Marrow_Derived_Cultured_Mesenchymal_Stem_Cells,Fetal_Adrenal_Gland	ADRENAL,FAT,STRONAL_CONNECTIVE	.	.	IKZF2	kidney	.	C	T	T	T	T	T/T,T/T	.	0	-0.433	-0.496	-0.269	0.058	0.033	0.018	687.2	1.91376e-44	1.555	0.106106	.	ERBB4,IKZF2
chr2	223987756	223987757	SNP	4	TFBS,enhancer,motif_alter,openChrom	EP300,FOXA1	.	MOTIFBR=DHS,FOXA1#PKNOX2_3#223987750#223987762#+#8#0.000298#0.000461	.	.	Fetal_Brain_Male,Fetal_Lung,H1_Cells,H9_Cells,Pancreas,iPS_DF_19.11_Cells,iPS_DF_6.9_Cells	BRAIN,ESC,LUNG,PANCREAS,iPSC	.	.	Gastric,HUVEC_Umbilical_Vein_Endothelial_Primary_Cells,Spleen,iPS_DF_19.11_Cells	GI_STOMACH,SPLEEN,VASCULAR,iPSC	.	.	.		.	A	G	G	G	G	G/G,G/G	rs6761103	AF=0.940495	2.43	2.432	0.651	0.717	0.605	0.487	.	.	.	0.087844	4	KCNE4,SCG2
chr2	227476835	227476836	SNP	4	TFBS,enhancer,motif_alter,openChrom	CEBPB,EP300,FOS,FOSL2,POLR2A,STAT3,TCF7L2,ZBTB33	.	MOTIFG=SPIB_1#227476834#227476841#+#3#7.638#6.464	.	.	Breast_variant_Human_Mammary_Epithelial_Cells_(vHMEC),Foreskin_Keratinocyte_Primary_Cells_skin02,IMR90_fetal_lung_fibroblasts_Cell_Line	BREAST,LUNG,SKIN	.	.	A549_EtOH_0.02pct_Lung_Carcinoma_Cell_Line,Bone_Marrow_Derived_Cultured_Mesenchymal_Stem_Cells,Foreskin_Fibroblast_Primary_Cells_skin01,IMR90_fetal_lung_fibroblasts_Cell_Line,Liver,Mesenchymal_Stem_Cell_Derived_Chondrocyte_Cultured_Cells,NH-A_Astrocytes_Primary_Cells,Osteoblast_Primary_Cells	BONE,BRAIN,LIVER,LUNG,SKIN,STROMAL_CONNECTIVE,STRONAL_CONNECTIVE	.	.	.		.	G	A	A	A	A	A/A,A/A	rs149687720	AF=0.00199681	-1.727	-1.818	-1.291	0	0	0	.	.	0.411	0.080754	.	IRS1
chr2	235788755	235788756	SNP	4	TFBS,enhancer,motif_alter,promoter	CEBPB,EP300,JUN,JUND,RAD21,SMC3	.	MOTIFBR=CEBPB,EP300,FOS,JUN,JUNB,JUND,RAD21#NR3C1_known14#235788746#235788764#+#11#0.111111#0.555556,MOTIFG=MSX1_5#235788750#235788758#+#7#7.979#4.828,MSX2_1#235788745#235788762#+#12#13.308#9.379,PRRX2_2#235788752#235788757#+#5#6.591#2.214,NOBOX_1#235788749#235788757#-#1#8.380#4.012,PDX1_3#235788752#235788758#-#2#7.104#2.709	.	.	.	.	A549_EtOH_0.02pct_Lung_Carcinoma_Cell_Line,NHEK-Epidermal_Keratinocyte_Primary_Cells	LUNG,SKIN	A549_EtOH_0.02pct_Lung_Carcinoma_Cell_Line,Fetal_Adrenal_Gland,Foreskin_Keratinocyte_Primary_Cells_skin03,H1_Derived_Mesenchymal_Stem_Cells,HUVEC_Umbilical_Vein_Endothelial_Primary_Cells,HepG2_Hepatocellular_Carcinoma_Cell_Line,IMR90_fetal_lung_fibroblasts_Cell_Line,Liver,NH-A_Astrocytes_Primary_Cells,NHEK-Epidermal_Keratinocyte_Primary_Cells,NHLF_Lung_Fibroblast_Primary_Cells,Osteoblast_Primary_…	ADRENAL,BONE,BRAIN,LIVER,LUNG,PANCREAS,SKIN,STROMAL_CONNECTIVE,VASCULAR	.	.	.		.	T	A	A	A	A	A/A,A/A	rs148077183	AF=0.0111821	-1.042	-1.156	0.53	0	0	0.001	.	.	7.215	0.108992	2b	ARL4C,SH3BP4
chr2	235789267	235789268	SNP	4	TFBS,enhancer,openChrom,promoter	ARID3A,ATF3,BHLHE40,CEBPB,CEBPD,CHD2,ELF1,EP300,FOS,FOSL2,FOXA1,FOXA2,GABPA,GATA2,GTF2F1,HDAC2,HNF4A,JUN,JUND,KAP1,MAFF,MAFK,MAX,MBD4,MXI1,MYBL2,MYC,NFIC,NR2C2,NR3C1,POLR2A,PPARGC1A,RAD21,RCOR1,REST,RFX5,RXRA,SIN3AK20,SMC3,SP1,STAT3,TBP,TCF12,TCF7L2,TEAD4,USF1	.	.	.	.	Breast_variant_Human_Mammary_Epithelial_Cells_(vHMEC),Fetal_Adrenal_Gland,Foreskin_Fibroblast_Primary_Cells_skin01,Foreskin_Fibroblast_Primary_Cells_skin02,Foreskin_Keratinocyte_Primary_Cells_skin02,Gastric,H1_Derived_Mesenchymal_Stem_Cells,IMR90_fetal_lung_fibroblasts_Cell_Line,Psoas_Muscle,Small_Intestine	ADRENAL,BREAST,GI_INTESTINE,GI_STOMACH,LUNG,MUSCLE,SKIN,STROMAL_CONNECTIVE	Adipose_Derived_Mesenchymal_Stem_Cell_Cultured_Cells,HeLa-S3_Cervical_Carcinoma_Cell_Line,Osteoblast_Primary_Cells	BONE,CERVIX,STRONAL_CONNECTIVE	Fetal_Adrenal_Gland,H1_Derived_Mesenchymal_Stem_Cells,HUVEC_Umbilical_Vein_Endothelial_Primary_Cells,Liver,NH-A_Astrocytes_Primary_Cells,NHEK-Epidermal_Keratinocyte_Primary_Cells,Osteoblast_Primary_Cells,Pancreas	ADRENAL,BONE,BRAIN,LIVER,PANCREAS,SKIN,STROMAL_CONNECTIVE,VASCULAR	.	.	.		.	C	T	T	T	T	T/T,T/T	rs139330911	AF=0.0111821	-2.922	-3.133	-0.499	0	0	0.042	.	.	2.598	0.235255	.	ARL4C,SH3BP4
chr2	235790417	235790418	SNP	4	TFBS,enhancer,openChrom,promoter	ARID3A,ATF3,CTCF,ELF1,EP300,FOSL2,KAP1,MAFF,MAX,MXI1,MYBL2,NFYA,NFYB,POLR2A,RAD21,REST,RXRA,SMC3,SP1,SPI1,SREBP1,TAF1,TBP,TEAD4,USF1,USF2,YY1,ZNF143	.	.	.	.	Breast_variant_Human_Mammary_Epithelial_Cells_(vHMEC),Foreskin_Keratinocyte_Primary_Cells_skin02,H1_BMP4_Derived_Trophoblast_Cultured_Cells,Primary_monocytes_from_peripheral_blood	BLOOD,BREAST,SKIN,Trophoblast	A549_EtOH_0.02pct_Lung_Carcinoma_Cell_Line,Adipose_Derived_Mesenchymal_Stem_Cell_Cultured_Cells,Adipose_Nuclei,Brain_Angular_Gyrus,Brain_Anterior_Caudate,Brain_Cingulate_Gyrus,Brain_Hippocampus_Middle,Brain_Inferior_Temporal_Lobe,Brain_Substantia_Nigra,Colon_Smooth_Muscle,Duodenum_Mucosa,Duodenum_Smooth_Muscle,Fetal_Lung,Foreskin_Keratinocyte_Primary_Cells_skin03,HUVEC_Umbilical_Vein_Endothelial_…	BRAIN,CERVIX,FAT,GI_COLON,GI_DUODENUM,GI_RECTUM,GI_STOMACH,LIVER,LUNG,MUSCLE,OVARY,SKIN,STROMAL_CONNECTIVE,STRONAL_CONNECTIVE,VASCULAR	A549_EtOH_0.02pct_Lung_Carcinoma_Cell_Line,Aorta,Brain_Cingulate_Gyrus,Brain_Hippocampus_Middle,Brain_Substantia_Nigra,Fetal_Adrenal_Gland,H1_Derived_Mesenchymal_Stem_Cells,HUVEC_Umbilical_Vein_Endothelial_Primary_Cells,HeLa-S3_Cervical_Carcinoma_Cell_Line,HepG2_Hepatocellular_Carcinoma_Cell_Line,IMR90_fetal_lung_fibroblasts_Cell_Line,Liver,NH-A_Astrocytes_Primary_Cells,NHEK-Epidermal_Keratinocyt…	ADRENAL,BONE,BRAIN,CERVIX,LIVER,LUNG,PANCREAS,SKIN,STROMAL_CONNECTIVE,VASCULAR	.	.	.		.	T	C	C	C	C	C/C,C/C	rs139968331	AF=0.0111821	0.236	0.238	0.501	0	0	0.01	.	.	2.322	0.108992	.	ARL4C,SH3BP4
chr20	33293758	33293759	indel	4	TFBS,enhancer,openChrom,promoter	CTCF,ELF1,NFIC,POLR2A,SMARCB1	.	.	.	.	H1_Cells	ESC	Adipose_Derived_Mesenchymal_Stem_Cell_Cultured_Cells,Adipose_Nuclei,Bone_Marrow_Derived_Cultured_Mesenchymal_Stem_Cells,Brain_Cingulate_Gyrus,Brain_Hippocampus_Middle,Brain_Substantia_Nigra,Colonic_Mucosa,Duodenum_Smooth_Muscle,Fetal_Adrenal_Gland,Foreskin_Fibroblast_Primary_Cells_skin01,Foreskin_Fibroblast_Primary_Cells_skin02,Foreskin_Melanocyte_Primary_Cells_skin01,HSMM_cell_derived_Skeletal_M…	ADRENAL,BRAIN,CERVIX,ENDODERM,FAT,GI_COLON,GI_DUODENUM,GI_RECTUM,GI_STOMACH,HEART,LIVER,LUNG,MUSCLE,SKIN,SPLEEN,STROMAL_CONNECTIVE,STRONAL_CONNECTIVE	A549_EtOH_0.02pct_Lung_Carcinoma_Cell_Line,Adipose_Nuclei,Aorta,Bone_Marrow_Derived_Cultured_Mesenchymal_Stem_Cells,Brain_Anterior_Caudate,Brain_Cingulate_Gyrus,Brain_Dorsolateral_Prefrontal_Cortex,Brain_Hippocampus_Middle,Brain_Inferior_Temporal_Lobe,Brain_Substantia_Nigra,Colon_Smooth_Muscle,Colonic_Mucosa,Duodenum_Smooth_Muscle,Esophagus,Fetal_Adrenal_Gland,Fetal_Intestine_Small,Fetal_Muscle_L…	ADRENAL,BLOOD,BRAIN,CERVIX,FAT,GI_COLON,GI_DUODENUM,GI_ESOPHAGUS,GI_INTESTINE,GI_RECTUM,GI_STOMACH,HEART,LIVER,LUNG,MUSCLE,MUSCLE_LEG,OVARY,PANCREAS,SKIN,SPLEEN,STRONAL_CONNECTIVE,VASCULAR	.	.	.		.	GA	G	G	G	G	G/G,G/G	.	0	1.187	2.189	0.557	0.037	0.733	0.958	2.50501e-42	446.6	11.04	0.114469	.	NCOA6,TP53INP2
chr20	33295113	33295114	SNC	4	TFBS,enhancer,openChrom,promoter	ARID3A,EP300,HDAC2,MBD4,MXI1,MYBL2,NFIC,RXRA,SIN3AK20,USF1	.	.	.	.	Fetal_Heart,Small_Intestine	GI_INTESTINE,HEART	Foreskin_Fibroblast_Primary_Cells_skin02,HepG2_Hepatocellular_Carcinoma_Cell_Line,Rectal_Mucosa_Donor_29	GI_RECTUM,LIVER,SKIN	Adipose_Nuclei,Brain_Angular_Gyrus,Brain_Anterior_Caudate,Brain_Cingulate_Gyrus,Brain_Hippocampus_Middle,Brain_Inferior_Temporal_Lobe,Brain_Substantia_Nigra,Duodenum_Smooth_Muscle,Fetal_Intestine_Small,HepG2_Hepatocellular_Carcinoma_Cell_Line,Left_Ventricle,Liver,Rectal_Mucosa_Donor_29,Rectal_Mucosa_Donor_31,Right_Atrium,Right_Ventricle,Skeletal_Muscle_Female,Small_Intestine,Stomach_Smooth_Muscle	BRAIN,FAT,GI_DUODENUM,GI_INTESTINE,GI_RECTUM,GI_STOMACH,HEART,LIVER,MUSCLE	.	.	.		.	T	C	C	C	C	C/C,C/C	.	0	0.278	0.268	0.457	0.301	0.172	0.032	.	.	1.989	0.162113	.	NCOA6,TP53INP2
chr20	33379745	33379746	SNC	4	TFBS,enhancer,openChrom,promoter	CEBPB,CHD2,EP300,JUND,KAP1,MAX,RAD21,SMC3,STAT3,TBP,TCF7L2	.	.	.	.	Fetal_Heart,Fetal_Lung,Foreskin_Fibroblast_Primary_Cells_skin01,IMR90_fetal_lung_fibroblasts_Cell_Line,Psoas_Muscle	HEART,LUNG,MUSCLE,SKIN	Mesenchymal_Stem_Cell_Derived_Adipocyte_Cultured_Cells	FAT	Bone_Marrow_Derived_Cultured_Mesenchymal_Stem_Cells,Brain_Anterior_Caudate,Brain_Cingulate_Gyrus,Colon_Smooth_Muscle,HSMM_cell_derived_Skeletal_Muscle_Myotubes_Cells,Mesenchymal_Stem_Cell_Derived_Chondrocyte_Cultured_Cells,Monocytes-CD14+_RO01746_Primary_Cells,Osteoblast_Primary_Cells,hESC_Derived_CD56+_Mesoderm_Cultured_Cells	BLOOD,BONE,BRAIN,ENDODERM,GI_COLON,MUSCLE,STROMAL_CONNECTIVE,STRONAL_CONNECTIVE	.	.	.		.	T	C	C	C	C	C/C,C/C	.	0	-3.492	-3.7	-2.778	0	0	0	.	.	0.016	0.088506	.	NCOA6,TP53INP2
chr20	35575639	35575640	SNP	4	TFBS,enhancer,openChrom,promoter	EBF1,EP300,ESR1,IRF1,MAFF,MAFK,SP1	.	.	.	.	H1_BMP4_Derived_Mesendoderm_Cultured_Cells,H1_Cells,H1_Derived_Neuronal_Progenitor_Cultured_Cells,H9_Cells,iPS_DF_19.11_Cells	BRAIN,ESC,Mesendoderm,iPSC	Brain_Hippocampus_Middle,Breast_Myoepithelial_Primary_Cells,Dnd41_TCell_Leukemia_Cell_Line,Duodenum_Mucosa,Duodenum_Smooth_Muscle,Foreskin_Keratinocyte_Primary_Cells_skin02,HUVEC_Umbilical_Vein_Endothelial_Primary_Cells,HeLa-S3_Cervical_Carcinoma_Cell_Line,Liver,Mesenchymal_Stem_Cell_Derived_Adipocyte_Cultured_Cells,Monocytes-CD14+_RO01746_Primary_Cells,NHEK-Epidermal_Keratinocyte_Primary_Cells,P…	BLOOD,BRAIN,BREAST,CERVIX,FAT,GI_DUODENUM,GI_RECTUM,GI_STOMACH,HEART,LIVER,SKIN,VASCULAR,iPSC	Adipose_Nuclei,Colon_Smooth_Muscle,Colonic_Mucosa,Duodenum_Smooth_Muscle,Esophagus,Fetal_Intestine_Large,Fetal_Intestine_Small,Fetal_Muscle_Leg,Fetal_Muscle_Trunk,Fetal_Stomach,Fetal_Thymus,GM12878_Lymphoblastoid_Cells,Gastric,H9_Cells,HUES48_Cells,Left_Ventricle,Liver,Lung,Monocytes-CD14+_RO01746_Primary_Cells,Primary_Natural_Killer_cells_from_peripheral_blood,Primary_T_CD8+_memory_cells_from_pe…	BLOOD,ESC,FAT,GI_COLON,GI_DUODENUM,GI_ESOPHAGUS,GI_INTESTINE,GI_RECTUM,GI_STOMACH,HEART,LIVER,LUNG,MUSCLE,MUSCLE_LEG,SPLEEN,THYMUS,iPSC	.	.	.		.	A	G	G	G	G	G/G,G/G	rs191405466	AF=0.00139776	0.001	0	-0.483	0	0	0	.	.	1.617	0.225121	.	DSN1,SAMHD1
chr20	35603391	35603392	indel	4	enhancer,motif_alter,openChrom,promoter	.	.	MOTIFBR=TCF7L2#HOXB8_1#35603378#35603394#-,TCF7L2#DMRT3_1#35603380#35603395#+,TCF7L2#SOX14_1#35603381#35603397#-,TCF7L2#SOX14_1#35603381#35603397#+,TCF7L2#SRY_4#35603381#35603397#-,TCF7L2#ZNF35_1#35603389#35603404#-	.	.	Primary_T_cells_from_peripheral_blood	BLOOD	Primary_Natural_Killer_cells_from_peripheral_blood,Primary_T_cells_effector/memory_enriched_from_peripheral_blood,Primary_T_cells_from_cord_blood,Primary_T_cells_from_peripheral_blood,Primary_T_helper_cells_from_peripheral_blood,Primary_T_helper_naive_cells_from_peripheral_blood	BLOOD	Dnd41_TCell_Leukemia_Cell_Line,Fetal_Thymus,Primary_Natural_Killer_cells_from_peripheral_blood,Primary_T_CD8+_memory_cells_from_peripheral_blood,Primary_T_CD8+_naive_cells_from_peripheral_blood,Primary_T_cells_effector/memory_enriched_from_peripheral_blood,Primary_T_cells_from_peripheral_blood,Primary_T_helper_cells_PMA-I_stimulated,Primary_T_helper_memory_cells_from_peripheral_blood_2,Primary_T_…	BLOOD,THYMUS	.	.	.		.	AT	A	A	A	A	A/A,A/A	.	0	0.767	0.747	0.37	0.156	0.134	0.305	.	.	7.022	0.056701	.	RBL1,SAMHD1
chr20	36339869	36339870	SNP	4	DE_gene,TFBS,enhancer,promoter	GATA1,ZNF217	.	.	.	.	.	.	Primary_hematopoietic_stem_cells_G-CSF-mobilized_Male	BLOOD	Fetal_Intestine_Large,Fetal_Intestine_Small,H1_BMP4_Derived_Mesendoderm_Cultured_Cells,Osteoblast_Primary_Cells,Placenta,Placenta_Amnion,Primary_hematopoietic_stem_cells_G-CSF-mobilized_Female,Skeletal_Muscle_Female,Spleen,hESC_Derived_CD56+_Mesoderm_Cultured_Cells	BLOOD,BONE,ENDODERM,GI_INTESTINE,MUSCLE,Mesendoderm,PLACENTA,SPLEEN	.	.	CTNNBL1	liver	.	G	A	A	A	A	A/A,A/A	rs6125953	AF=0.0061901	0.347	0.318	0.478	0.002	0.002	0.005	.	.	5.724	0.108992	5	CTNNBL1,KIAA0406
chr20	36340415	36340416	SNP	4	DE_gene,TFBS,enhancer,promoter	E2F6,GATA2	.	.	.	.	.	.	Ganglion_Eminence_derived_primary_cultured_neurospheres	BRAIN	Brain_Angular_Gyrus,Brain_Anterior_Caudate,Brain_Cingulate_Gyrus,Brain_Dorsolateral_Prefrontal_Cortex,Brain_Hippocampus_Middle,Brain_Inferior_Temporal_Lobe,Brain_Substantia_Nigra,Fetal_Intestine_Large,Fetal_Intestine_Small,H1_BMP4_Derived_Mesendoderm_Cultured_Cells,H1_BMP4_Derived_Trophoblast_Cultured_Cells,Left_Ventricle,Liver,Lung,Placenta,Placenta_Amnion,Primary_hematopoietic_stem_cells_G-CSF-…	BLOOD,BRAIN,ENDODERM,GI_COLON,GI_INTESTINE,GI_RECTUM,GI_STOMACH,HEART,LIVER,LUNG,MUSCLE,Mesendoderm,PLACENTA,SPLEEN,Trophoblast	.	.	CTNNBL1	liver	.	G	A	A	A	A	A/A,A/A	rs6125957	AF=0.0061901	-0.721	-1.296	-2.923	0	0	0.014	.	.	0.27	0.088506	5	CTNNBL1,KIAA0406
chr20	36356674	36356675	SNP	4	DE_gene,TFBS,enhancer,promoter	RELA	.	.	.	.	.	.	hESC_Derived_CD184+_Endoderm_Cultured_Cells	ENDODERM	Adipose_Nuclei,Brain_Cingulate_Gyrus,Brain_Hippocampus_Middle,Brain_Substantia_Nigra,H1_Derived_Neuronal_Progenitor_Cultured_Cells,HUES48_Cells,HUES64_Cells,Mesenchymal_Stem_Cell_Derived_Chondrocyte_Cultured_Cells,Skeletal_Muscle_Female,hESC_Derived_CD56+_Ectoderm_Cultured_Cells	BRAIN,ENDODERM,ESC,FAT,MUSCLE,STROMAL_CONNECTIVE	.	.	CTNNBL1	liver	.	A	G	G	G	G	G/G,G/G	rs118171126	AF=0.0061901	0.412	0.416	0.651	0.002	0.001	0.008	.	.	2.935	0.084033	.	CTNNBL1,KIAA0406
chr20	36366482	36366483	SNP	4	DE_gene,enhancer,openChrom,promoter	.	.	.	.	.	Gastric,Placenta,Psoas_Muscle	GI_STOMACH,MUSCLE,PLACENTA	ES-UCSF4_Cells,Fetal_Heart,Stomach_Mucosa	ESC,GI_STOMACH,HEART	Left_Ventricle,Monocytes-CD14+_RO01746_Primary_Cells,Psoas_Muscle,Right_Atrium,Right_Ventricle	BLOOD,HEART,MUSCLE	.	.	CTNNBL1	liver	.	C	T	T	T	T	T/T,T/T	rs6020578	AF=0.0091853	0.019	-0.011	-0.321	0.001	0	0.002	.	.	6.954	0.062308	4	CTNNBL1,KIAA0406
chr22	19748959	19748960	SNP	4	DMR,TFBS,enhancer,openChrom	CHD1,E2F6,EZH2,HDAC1,HMGN3,MAX,MYC,PHF8,RBBP5,SUZ12,UBTF,ZBTB7A	.	.	.	.	iPS_DF_6.9_Cells	iPSC	.	.	HSMM_Skeletal_Muscle_Myoblasts_Cells,HSMM_cell_derived_Skeletal_Muscle_Myotubes_Cells,K562_Leukemia_Cells,Primary_T_CD8+_memory_cells_from_peripheral_blood,Psoas_Muscle,Skeletal_Muscle_Female	BLOOD,MUSCLE	.	.	.		DMR	T	C	C	C	C	C/C,C/C	rs72646954	AF=0.0191693	1.312	2.034	0.473	0.035	0.02	0.17	.	.	9.655	0.11394	4	GNB1L,TBX1
chr22	19749177	19749178	SNP	4	DMR,TFBS,enhancer,promoter	EZH2,HMGN3,RBBP5,SUZ12,UBTF	.	.	.	.	.	.	Fetal_Muscle_Leg,Fetal_Muscle_Trunk,H9_Cells,HSMM_Skeletal_Muscle_Myoblasts_Cells,HSMM_cell_derived_Skeletal_Muscle_Myotubes_Cells,HUVEC_Umbilical_Vein_Endothelial_Primary_Cells,K562_Leukemia_Cells,Mesenchymal_Stem_Cell_Derived_Adipocyte_Cultured_Cells,Muscle_Satellite_Cultured_Cells,NHDF-Ad_Adult_Dermal_Fibroblast_Primary_Cells,Primary_hematopoietic_stem_cells,Psoas_Muscle,Right_Ventricle,Skelet…	BLOOD,ESC,FAT,HEART,MUSCLE,MUSCLE_LEG,SKIN,VASCULAR,iPSC	HSMM_Skeletal_Muscle_Myoblasts_Cells,HSMM_cell_derived_Skeletal_Muscle_Myotubes_Cells,K562_Leukemia_Cells,NHDF-Ad_Adult_Dermal_Fibroblast_Primary_Cells,Primary_T_CD8+_memory_cells_from_peripheral_blood,Primary_T_helper_memory_cells_from_peripheral_blood_2,Psoas_Muscle,Skeletal_Muscle_Female	BLOOD,MUSCLE,SKIN	.	.	.		DMR	A	G	G	G	G	G/G,G/G	rs80179718	AF=0.0191693	0.285	0.322	0.291	0	0	0.007	.	.	6.503	0.110573	5	GNB1L,TBX1
chr22	19749507	19749508	SNP	4	DMR,TFBS,enhancer,openChrom	CBX3,EZH2,FOXA1,FOXA2,HDAC1,HDAC2,HDAC8,KDM5B,MAX,PHF8,PML,RBBP5,SAP30,SIN3AK20,STAT2,TEAD4,TRIM28,UBTF	.	.	.	.	Fetal_Heart,Fetal_Muscle_Trunk,Fetal_Thymus,H1_Derived_Neuronal_Progenitor_Cultured_Cells,H9_Cells,Small_Intestine,iPS_DF_19.11_Cells,iPS_DF_6.9_Cells	BRAIN,ESC,GI_INTESTINE,HEART,MUSCLE,THYMUS,iPSC	.	.	Fetal_Muscle_Leg,Foreskin_Fibroblast_Primary_Cells_skin02,HSMM_Skeletal_Muscle_Myoblasts_Cells,HSMM_cell_derived_Skeletal_Muscle_Myotubes_Cells,HUVEC_Umbilical_Vein_Endothelial_Primary_Cells,K562_Leukemia_Cells,Lung,NHDF-Ad_Adult_Dermal_Fibroblast_Primary_Cells,Primary_T_CD8+_memory_cells_from_peripheral_blood,Primary_T_helper_memory_cells_from_peripheral_blood_2,Primary_hematopoietic_stem_cells_…	BLOOD,LUNG,MUSCLE,MUSCLE_LEG,SKIN,VASCULAR	.	.	.		DMR	C	G	G	G	G	G/G,G/G	rs41298798	AF=0.0165735	0.849	0.629	0.544	0.965	0.92	0.605	381.1	7.03732e-63	15.71	0.199473	4	GNB1L,TBX1
chr22	20097335	20097336	SNP	4	TFBS,TFBS_motif,eQTL,promoter	GATA2,NR3C1,POLR2A,TRIM28	NR3C1	.	Artery_Aorta,Thyroid,testis	.	.	.	Foreskin_Fibroblast_Primary_Cells_skin02	SKIN	.	.	.	.	.		.	A	G	G	G	G	G/G,G/G	rs73389786	AF=0.0884585	-0.545	-0.66	-0.321	0	0	0.001	.	.	3.327	0.115753	4	DGCR8,TRMT2A
chr22	20099890	20099891	SNP	4	TFBS,eQTL,enhancer,promoter	BCL3,PML,POLR2A	.	.	Artery_Aorta,Thyroid,testis	.	.	.	Foreskin_Fibroblast_Primary_Cells_skin02	SKIN	Brain_Angular_Gyrus,Brain_Anterior_Caudate,Brain_Cingulate_Gyrus,Brain_Dorsolateral_Prefrontal_Cortex,Brain_Hippocampus_Middle,Brain_Inferior_Temporal_Lobe,Brain_Substantia_Nigra,Fetal_Adrenal_Gland,Fetal_Muscle_Leg,Fetal_Thymus,Foreskin_Fibroblast_Primary_Cells_skin01,Foreskin_Fibroblast_Primary_Cells_skin02,Foreskin_Melanocyte_Primary_Cells_skin03,HUES64_Cells,HepG2_Hepatocellular_Carcinoma_Cel…	ADRENAL,BLOOD,BRAIN,ENDODERM,ESC,GI_RECTUM,GI_STOMACH,LIVER,MUSCLE,MUSCLE_LEG,SKIN,SPLEEN,STROMAL_CONNECTIVE,THYMUS,iPSC	.	.	.		.	C	G	G	G	G	G/G,G/G	rs1048659	AF=0.0878594	-0.607	-0.549	0.557	0	0	0.007	.	.	5.984	0.256867	2b	DGCR8,TRMT2A
chr22	20101391	20101392	indel	4	TFBS,eQTL,enhancer,promoter	CHD1,HDAC1,POLR2A	.	.	Artery_Aorta,Thyroid	.	.	.	Esophagus,Foreskin_Fibroblast_Primary_Cells_skin01,Foreskin_Melanocyte_Primary_Cells_skin01,H1_Derived_Mesenchymal_Stem_Cells,Spleen	GI_ESOPHAGUS,SKIN,SPLEEN,STROMAL_CONNECTIVE	Brain_Hippocampus_Middle,Brain_Substantia_Nigra,Foreskin_Fibroblast_Primary_Cells_skin02,Monocytes-CD14+_RO01746_Primary_Cells,Primary_hematopoietic_stem_cells_G-CSF-mobilized_Female,Right_Ventricle	BLOOD,BRAIN,HEART,SKIN	.	.	.		.	C	CCT	CCT	CCT	CCT	CCT/CCT,CCT/CCT	rs111617686	AF=0.0878594	-1.056	-0.946	0.55	0	0	0.001	.	.	6.024	0.075938	.	RANBP1,TRMT2A
chr22	20103188	20103189	SNP	4	TFBS,eQTL,enhancer,promoter	POLR2A	.	.	Adipose_Subcutaneous,Artery_Aorta,Colon_Transverse,Esophagus_Gastroesophageal_Junction,Nerve_Tibial,Thyroid,testis	.	.	.	Adipose_Derived_Mesenchymal_Stem_Cell_Cultured_Cells,Dnd41_TCell_Leukemia_Cell_Line,Esophagus,Foreskin_Fibroblast_Primary_Cells_skin01,Foreskin_Fibroblast_Primary_Cells_skin02,Foreskin_Keratinocyte_Primary_Cells_skin02,Foreskin_Keratinocyte_Primary_Cells_skin03,H9_Derived_Neuronal_Progenitor_Cultured_Cells,HSMM_Skeletal_Muscle_Myoblasts_Cells,HSMM_cell_derived_Skeletal_Muscle_Myotubes_Cells,HeLa-…	BLOOD,BRAIN,CERVIX,FAT,GI_ESOPHAGUS,GI_STOMACH,LIVER,MUSCLE,SKIN,STROMAL_CONNECTIVE,STRONAL_CONNECTIVE	Adipose_Nuclei,Brain_Dorsolateral_Prefrontal_Cortex,Brain_Hippocampus_Middle,Brain_Substantia_Nigra,Colon_Smooth_Muscle,Dnd41_TCell_Leukemia_Cell_Line,Fetal_Muscle_Leg,Fetal_Muscle_Trunk,Foreskin_Fibroblast_Primary_Cells_skin01,Foreskin_Fibroblast_Primary_Cells_skin02,Foreskin_Melanocyte_Primary_Cells_skin03,HSMM_Skeletal_Muscle_Myoblasts_Cells,HSMM_cell_derived_Skeletal_Muscle_Myotubes_Cells,HUE…	BLOOD,BRAIN,CERVIX,ENDODERM,ESC,FAT,GI_COLON,MUSCLE,MUSCLE_LEG,PANCREAS,SKIN,STROMAL_CONNECTIVE	.	.	.		.	T	C	C	C	C	C/C,C/C	rs79886149	AF=0.0507188	0.002	-0.026	-0.329	0.026	0.061	0.035	333.6	3.19724e-59	1.19	0.12324	4	RANBP1,TRMT2A
chr22	36214094	36214095	SNP	4	TFBS,enhancer,motif_alter,openChrom	BATF,CEBPB,EBF1,FOS,RELA	.	MOTIFBR=BATF,DHS,EBF1#CEBPB_known1#36214086#36214100#+#10#0.047619#0.952381	.	.	Breast_variant_Human_Mammary_Epithelial_Cells_(vHMEC),Fetal_Adrenal_Gland,Foreskin_Fibroblast_Primary_Cells_skin01,Foreskin_Fibroblast_Primary_Cells_skin02,Foreskin_Keratinocyte_Primary_Cells_skin02,IMR90_fetal_lung_fibroblasts_Cell_Line	ADRENAL,BREAST,LUNG,SKIN	.	.	Adipose_Nuclei,Bone_Marrow_Derived_Cultured_Mesenchymal_Stem_Cells,Colon_Smooth_Muscle,Liver,Mesenchymal_Stem_Cell_Derived_Chondrocyte_Cultured_Cells	FAT,GI_COLON,LIVER,STROMAL_CONNECTIVE,STRONAL_CONNECTIVE	.	.	.		.	A	C	C	C	C	C/C,C/C	rs545130869	AF=0.000599042	1.909	1.452	0.604	0.984	0.545	0.092	516.5	1.46788e-91	2.757	0.088506	.	APOL5,RBM9
chr22	36217824	36217825	SNP	4	TFBS,enhancer,openChrom,promoter	EP300,FOXA2,RXRA	.	.	.	.	iPS_DF_19.11_Cells	iPSC	Brain_Substantia_Nigra,Sigmoid_Colon	BRAIN,GI_COLON	NH-A_Astrocytes_Primary_Cells,Psoas_Muscle,Stomach_Smooth_Muscle	BRAIN,GI_STOMACH,MUSCLE	.	.	.		.	A	G	G	G	G	G/G,G/G	rs536341515	AF=0.000599042	-0.562	-0.568	-0.329	0	0	0.003	.	.	1.055	0.048788	.	APOL5,RBM9
chr22	36259637	36259638	SNP	4	TFBS,enhancer,openChrom,promoter	EP300	.	.	.	.	Fetal_Muscle_Trunk,Foreskin_Keratinocyte_Primary_Cells_skin02,H1_BMP4_Derived_Mesendoderm_Cultured_Cells,H1_BMP4_Derived_Trophoblast_Cultured_Cells,Placenta	MUSCLE,Mesendoderm,PLACENTA,SKIN,Trophoblast	Brain_Dorsolateral_Prefrontal_Cortex,Brain_Inferior_Temporal_Lobe,Skeletal_Muscle_Female,Skeletal_Muscle_Male,Stomach_Smooth_Muscle	BRAIN,GI_STOMACH,MUSCLE	Aorta,Fetal_Muscle_Leg,Fetal_Muscle_Trunk,HSMM_cell_derived_Skeletal_Muscle_Myotubes_Cells,Psoas_Muscle,Right_Ventricle,Skeletal_Muscle_Female,hESC_Derived_CD56+_Ectoderm_Cultured_Cells	ENDODERM,HEART,MUSCLE,MUSCLE_LEG,VASCULAR	.	.	.		.	T	C	C	C	C	C/C,C/C	rs578033416	AF=0.00139776	-0.835	-0.501	-0.266	0	0	0.007	103.4	1.07974e-08	3.383	0.087844	.	APOL5,RBM9
chr22	36288464	36288465	SNP	4	TFBS,enhancer,openChrom,promoter	FOS,JUN,MAFK,MYC,RAD21	.	.	.	.	Breast_variant_Human_Mammary_Epithelial_Cells_(vHMEC),Fetal_Lung,Fetal_Muscle_Leg,Fetal_Muscle_Trunk,Foreskin_Fibroblast_Primary_Cells_skin01,Foreskin_Fibroblast_Primary_Cells_skin02,Foreskin_Keratinocyte_Primary_Cells_skin02,IMR90_fetal_lung_fibroblasts_Cell_Line,Ovary,Primary_hematopoietic_stem_cells_G-CSF-mobilized_Female,Psoas_Muscle	BLOOD,BREAST,LUNG,MUSCLE,MUSCLE_LEG,OVARY,SKIN	Aorta,Colon_Smooth_Muscle,Fetal_Heart,Left_Ventricle,Mesenchymal_Stem_Cell_Derived_Adipocyte_Cultured_Cells,NHEK-Epidermal_Keratinocyte_Primary_Cells,Right_Atrium,Skeletal_Muscle_Female,Skeletal_Muscle_Male,Stomach_Smooth_Muscle	FAT,GI_COLON,GI_STOMACH,HEART,MUSCLE,SKIN,VASCULAR	Brain_Inferior_Temporal_Lobe,Colon_Smooth_Muscle,Duodenum_Smooth_Muscle,Esophagus,Fetal_Muscle_Leg,H1_Derived_Mesenchymal_Stem_Cells,HMEC_Mammary_Epithelial_Primary_Cells,Left_Ventricle,Mesenchymal_Stem_Cell_Derived_Chondrocyte_Cultured_Cells,NHEK-Epidermal_Keratinocyte_Primary_Cells,Osteoblast_Primary_Cells,Ovary,Psoas_Muscle,Rectal_Smooth_Muscle,Right_Atrium,Skeletal_Muscle_Female,Stomach_Smoot…	BONE,BRAIN,BREAST,ENDODERM,GI_COLON,GI_DUODENUM,GI_ESOPHAGUS,GI_RECTUM,GI_STOMACH,HEART,MUSCLE,MUSCLE_LEG,OVARY,SKIN,STROMAL_CONNECTIVE	.	.	.		.	C	A	A	A	A	A/A,A/A	rs528679685	AF=0.00139776	1.322	1.279	0.33	0.001	0.001	0.034	.	.	8.549	0.158681	.	APOL5,RBM9
chr22	36306265	36306266	SNP	4	TFBS,TFBS_motif,enhancer,openChrom	FOS,JUN	AP1	.	.	.	Foreskin_Fibroblast_Primary_Cells_skin02,Primary_hematopoietic_stem_cells_G-CSF-mobilized_Female,Primary_hematopoietic_stem_cells_G-CSF-mobilized_Male	BLOOD,SKIN	.	.	HUVEC_Umbilical_Vein_Endothelial_Primary_Cells,NH-A_Astrocytes_Primary_Cells,Osteoblast_Primary_Cells,Primary_hematopoietic_stem_cells_G-CSF-mobilized_Female,Skeletal_Muscle_Female,hESC_Derived_CD56+_Mesoderm_Cultured_Cells	BLOOD,BONE,BRAIN,ENDODERM,MUSCLE,VASCULAR	.	.	.		.	G	A	A	A	A	A/A,A/A	rs6000032	AF=0.0798722	-0.173	-0.217	0.53	0	0	0.422	.	.	10.46	0.235255	2a	APOL5,RBM9
chr22	36306484	36306485	SNP	4	enhancer,motif_alter,openChrom,promoter	.	.	MOTIFG=MYOG_1#36306483#36306491#+#3#8.732#4.337,TFCP2_2#36306484#36306491#-#6#8.224#4.050	.	.	Fetal_Heart,Fetal_Lung,Foreskin_Keratinocyte_Primary_Cells_skin02,H1_BMP4_Derived_Mesendoderm_Cultured_Cells,H1_Derived_Neuronal_Progenitor_Cultured_Cells	BRAIN,HEART,LUNG,Mesendoderm,SKIN	Adipose_Derived_Mesenchymal_Stem_Cell_Cultured_Cells,Duodenum_Smooth_Muscle,HUVEC_Umbilical_Vein_Endothelial_Primary_Cells,NH-A_Astrocytes_Primary_Cells,Skeletal_Muscle_Female	BRAIN,GI_DUODENUM,MUSCLE,STRONAL_CONNECTIVE,VASCULAR	Bone_Marrow_Derived_Cultured_Mesenchymal_Stem_Cells,H1_Derived_Mesenchymal_Stem_Cells,HUVEC_Umbilical_Vein_Endothelial_Primary_Cells,Left_Ventricle,NH-A_Astrocytes_Primary_Cells,NHEK-Epidermal_Keratinocyte_Primary_Cells,Osteoblast_Primary_Cells,Primary_hematopoietic_stem_cells_G-CSF-mobilized_Female,Skeletal_Muscle_Female	BLOOD,BONE,BRAIN,HEART,MUSCLE,SKIN,STROMAL_CONNECTIVE,STRONAL_CONNECTIVE,VASCULAR	.	.	.		.	G	C	C	C	C	C/C,C/C	rs5755989	AF=0.0730831	-0.117	-0.114	-1.159	0.889	0.82	0.915	489.2	2.24953e-60	12.14	0.101703	5	APOL5,RBM9
chr22	36311769	36311770	SNP	4	TFBS,enhancer,openChrom,promoter	FOS,REST	.	.	.	.	Breast_variant_Human_Mammary_Epithelial_Cells_(vHMEC),Fetal_Thymus,Foreskin_Fibroblast_Primary_Cells_skin01,Foreskin_Fibroblast_Primary_Cells_skin02,Foreskin_Keratinocyte_Primary_Cells_skin02,H1_BMP4_Derived_Trophoblast_Cultured_Cells,IMR90_fetal_lung_fibroblasts_Cell_Line	BREAST,LUNG,SKIN,THYMUS,Trophoblast	A549_EtOH_0.02pct_Lung_Carcinoma_Cell_Line,Adipose_Derived_Mesenchymal_Stem_Cell_Cultured_Cells,Bone_Marrow_Derived_Cultured_Mesenchymal_Stem_Cells,Brain_Angular_Gyrus,Brain_Anterior_Caudate,Brain_Cingulate_Gyrus,Brain_Dorsolateral_Prefrontal_Cortex,Brain_Germinal_Matrix,Brain_Hippocampus_Middle,Brain_Inferior_Temporal_Lobe,Brain_Substantia_Nigra,Breast_variant_Human_Mammary_Epithelial_Cells_(vHM…	BLOOD,BONE,BRAIN,BREAST,CERVIX,ENDODERM,ESC,FAT,GI_COLON,GI_DUODENUM,GI_INTESTINE,GI_RECTUM,GI_STOMACH,HEART,KIDNEY,LIVER,LUNG,MUSCLE,SKIN,STROMAL_CONNECTIVE,STRONAL_CONNECTIVE,VASCULAR,iPSC	A549_EtOH_0.02pct_Lung_Carcinoma_Cell_Line,Adipose_Nuclei,Aorta,Bone_Marrow_Derived_Cultured_Mesenchymal_Stem_Cells,Brain_Angular_Gyrus,Brain_Anterior_Caudate,Brain_Cingulate_Gyrus,Brain_Dorsolateral_Prefrontal_Cortex,Brain_Hippocampus_Middle,Brain_Inferior_Temporal_Lobe,Brain_Substantia_Nigra,Colon_Smooth_Muscle,Colonic_Mucosa,Dnd41_TCell_Leukemia_Cell_Line,Duodenum_Smooth_Muscle,Esophagus,Fetal…	ADRENAL,BLOOD,BONE,BRAIN,BREAST,CERVIX,ENDODERM,ESC,FAT,GI_COLON,GI_DUODENUM,GI_ESOPHAGUS,GI_INTESTINE,GI_RECTUM,GI_STOMACH,HEART,LIVER,LUNG,MUSCLE,MUSCLE_LEG,Mesendoderm,OVARY,PANCREAS,SKIN,STROMAL_CONNECTIVE,STRONAL_CONNECTIVE,THYMUS,VASCULAR,iPSC	.	.	.		.	T	G	G	G	G	G/G,G/G	rs5750200	AF=0.0736821	0.287	0.283	0.645	0	0	0.043	.	.	6.265	0.101703	5	APOL5,RBM9
chr22	40576301	40576302	SNP	4	TFBS,enhancer,openChrom,promoter	FOXA1,IRF1	.	.	.	.	H1_Derived_Mesenchymal_Stem_Cells,H9_Cells,Primary_Natural_Killer_cells_from_peripheral_blood,Primary_T_cells_from_peripheral_blood,Small_Intestine	BLOOD,ESC,GI_INTESTINE,STROMAL_CONNECTIVE	Adipose_Derived_Mesenchymal_Stem_Cell_Cultured_Cells,Adipose_Nuclei,Bone_Marrow_Derived_Cultured_Mesenchymal_Stem_Cells,Brain_Angular_Gyrus,Brain_Anterior_Caudate,Brain_Cingulate_Gyrus,Brain_Dorsolateral_Prefrontal_Cortex,Brain_Germinal_Matrix,Brain_Hippocampus_Middle,Brain_Inferior_Temporal_Lobe,Brain_Substantia_Nigra,Breast_Myoepithelial_Primary_Cells,Colon_Smooth_Muscle,Colonic_Mucosa,Cortex_d…	BLOOD,BONE,BRAIN,BREAST,CERVIX,ENDODERM,ESC,FAT,GI_COLON,GI_DUODENUM,GI_INTESTINE,GI_RECTUM,GI_STOMACH,HEART,LIVER,LUNG,MUSCLE,MUSCLE_LEG,Mesendoderm,PANCREAS,SKIN,STROMAL_CONNECTIVE,STRONAL_CONNECTIVE,VASCULAR,iPSC	Adipose_Nuclei,Bone_Marrow_Derived_Cultured_Mesenchymal_Stem_Cells,Brain_Angular_Gyrus,Brain_Anterior_Caudate,Brain_Cingulate_Gyrus,Brain_Inferior_Temporal_Lobe,Brain_Substantia_Nigra,Colon_Smooth_Muscle,Colonic_Mucosa,Dnd41_TCell_Leukemia_Cell_Line,Duodenum_Smooth_Muscle,Fetal_Adrenal_Gland,Fetal_Intestine_Large,Fetal_Intestine_Small,Fetal_Muscle_Leg,Fetal_Thymus,GM12878_Lymphoblastoid_Cells,H1_…	ADRENAL,BLOOD,BRAIN,ENDODERM,ESC,FAT,GI_COLON,GI_DUODENUM,GI_INTESTINE,GI_RECTUM,GI_STOMACH,HEART,LIVER,MUSCLE,MUSCLE_LEG,Mesendoderm,SKIN,STROMAL_CONNECTIVE,STRONAL_CONNECTIVE,THYMUS,VASCULAR,iPSC	.	.	.	.	.	T	G	G	G	G	G/G,G/G	rs145463655	AF=0.00599042	3.197	2.579	0.559	0.022	0.018	0.096	1327	7.32986e-75	7.135	0.123797	.	ADSL,TNRC6B
chr22	40590228	40590229	SNP	4	TFBS,enhancer,motif_alter,openChrom,promoter	BACH1,BCL11A,BRCA1,EP300,JUN,JUND,MAFK,MYC,POLR2A,RBBP5,SP1,TAF1,TBP,TEAD4,ZNF143	.	MOTIFBR=SP1,TAF1,TBP#MEF2_known4#40590219#40590241#+#11#0.000000#0.470000	.	.	H1_BMP4_Derived_Mesendoderm_Cultured_Cells,H1_Cells,H9_Cells,iPS_DF_6.9_Cells	ESC,Mesendoderm,iPSC	H1_Derived_Neuronal_Progenitor_Cultured_Cells,H9_Cells,HUES48_Cells,HUES64_Cells,HUES6_Cells,hESC_Derived_CD184+_Endoderm_Cultured_Cells,iPS-15b_Cells,iPS-18_Cells,iPS-20b_Cells	BRAIN,ENDODERM,ESC,iPSC	Brain_Cingulate_Gyrus,Brain_Dorsolateral_Prefrontal_Cortex,Brain_Hippocampus_Middle,Brain_Inferior_Temporal_Lobe,Duodenum_Smooth_Muscle,Fetal_Thymus,Foreskin_Keratinocyte_Primary_Cells_skin03,H1_BMP4_Derived_Mesendoderm_Cultured_Cells,H1_Cells,H9_Cells,HMEC_Mammary_Epithelial_Primary_Cells,HUES48_Cells,HUES64_Cells,HUES6_Cells,Left_Ventricle,Monocytes-CD14+_RO01746_Primary_Cells,Primary_T_helper_…	BLOOD,BRAIN,BREAST,ENDODERM,ESC,GI_DUODENUM,GI_RECTUM,GI_STOMACH,HEART,Mesendoderm,SKIN,THYMUS,iPSC	.	.	.		.	T	G	G	G	G	G/G,G/G	rs114723344	AF=0.00579073	-1.297	-1.389	0.198	0	0	0.001	.	.	2.114	0	2b	ADSL,TNRC6B
chr22	40725212	40725213	SNC	4	TFBS,enhancer,openChrom,promoter	ARID3A,ATF1,BHLHE40,CBX3,CCNT2,CEBPB,EP300,GABPA,GATA1,GATA2,HMGN3,JUN,JUND,MAX,MYC,NR2F2,NRF1,PML,POLR2A,RCOR1,SPI1,STAT5A,TAL1,TBL1XR1,TEAD4,TRIM28,USF1,ZBTB33,ZNF274	.	.	.	.	Fetal_Muscle_Leg,Primary_hematopoietic_stem_cells_G-CSF-mobilized_Female,Primary_hematopoietic_stem_cells_G-CSF-mobilized_Male	BLOOD,MUSCLE_LEG	Brain_Hippocampus_Middle,Primary_hematopoietic_stem_cells_G-CSF-mobilized_Male	BLOOD,BRAIN	Brain_Angular_Gyrus,Brain_Anterior_Caudate,Brain_Cingulate_Gyrus,Brain_Dorsolateral_Prefrontal_Cortex,Brain_Hippocampus_Middle,Brain_Inferior_Temporal_Lobe,Brain_Substantia_Nigra,Fetal_Adrenal_Gland,Foreskin_Melanocyte_Primary_Cells_skin03,Primary_T_cells_effector/memory_enriched_from_peripheral_blood,Primary_T_helper_cells_PMA-I_stimulated,Primary_T_helper_cells_from_peripheral_blood,Primary_T_h…	ADRENAL,BLOOD,BRAIN,GI_INTESTINE,SKIN	.	.	.		.	G	A	A	A	A	A/A,A/A	.	0	0.858	0.786	0.525	0.001	0.001	0.001	.	.	4.797	0.163922	.	ADSL,TNRC6B
chr22	40725216	40725217	SNC	4	TFBS,enhancer,openChrom,promoter	ARID3A,ATF1,BHLHE40,CBX3,CCNT2,CEBPB,EP300,GABPA,GATA1,GATA2,HMGN3,JUN,JUND,MAX,MYC,NR2F2,NRF1,PML,POLR2A,RCOR1,SPI1,STAT5A,TAL1,TBL1XR1,TEAD4,TRIM28,USF1,ZBTB33,ZNF274	.	.	.	.	Fetal_Muscle_Leg,Primary_hematopoietic_stem_cells_G-CSF-mobilized_Female,Primary_hematopoietic_stem_cells_G-CSF-mobilized_Male	BLOOD,MUSCLE_LEG	Brain_Hippocampus_Middle,Primary_hematopoietic_stem_cells_G-CSF-mobilized_Male	BLOOD,BRAIN	Brain_Angular_Gyrus,Brain_Anterior_Caudate,Brain_Cingulate_Gyrus,Brain_Dorsolateral_Prefrontal_Cortex,Brain_Hippocampus_Middle,Brain_Inferior_Temporal_Lobe,Brain_Substantia_Nigra,Fetal_Adrenal_Gland,Foreskin_Melanocyte_Primary_Cells_skin03,Primary_T_cells_effector/memory_enriched_from_peripheral_blood,Primary_T_helper_cells_PMA-I_stimulated,Primary_T_helper_cells_from_peripheral_blood,Primary_T_h…	ADRENAL,BLOOD,BRAIN,GI_INTESTINE,SKIN	.	.	.		.	T	C	C	C	C	C/C,C/C	.	0	0.011	0.112	0.646	0	0	0.001	.	.	2.536	0.163922	.	ADSL,TNRC6B
chr22	46069686	46069687	SNP	4	TFBS,enhancer,openChrom,promoter	ATF3,SPI1	.	.	.	.	Primary_hematopoietic_stem_cells_G-CSF-mobilized_Male	BLOOD	A549_EtOH_0.02pct_Lung_Carcinoma_Cell_Line,Adipose_Derived_Mesenchymal_Stem_Cell_Cultured_Cells,Bone_Marrow_Derived_Cultured_Mesenchymal_Stem_Cells,Brain_Inferior_Temporal_Lobe,Dnd41_TCell_Leukemia_Cell_Line,Duodenum_Smooth_Muscle,Fetal_Lung,Foreskin_Fibroblast_Primary_Cells_skin01,Foreskin_Fibroblast_Primary_Cells_skin02,Foreskin_Keratinocyte_Primary_Cells_skin02,Foreskin_Keratinocyte_Primary_Ce…	BLOOD,BONE,BRAIN,CERVIX,FAT,GI_DUODENUM,GI_STOMACH,LUNG,MUSCLE,SKIN,STROMAL_CONNECTIVE,STRONAL_CONNECTIVE,iPSC	A549_EtOH_0.02pct_Lung_Carcinoma_Cell_Line,GM12878_Lymphoblastoid_Cells,Liver	BLOOD,LIVER,LUNG	.	.	.		.	G	A	A	A	A	A/A,A/A	rs111271344	AF=0.0289537	-0.048	-0.083	0.375	0	0	0.038	.	.	5.279	0.119682	5	ATXN10,WNT7B
[truncated: 3,940 more rows]

## Sheet: annotation_chrX
variant information				annotation																		population genetics								conservation								scoring systems			gene info
chr	start	end	variant_type	number_annotations	annotations	TFBS	TFBS_motif	motif_alter	eQTL	evoData	openChromatin	openChrom_TissueType	H3K4me3_promoter	H3K4me3_tissueType	H3K27ac_enhancer	H3K27ac_tissueType	eRNA	desert	DE_gene	DE_gene_tissue	DMR	Human_MajorAllele	Ancestral	Chimp	Gorilla	Orang	Archaics_Genotypes(AltaiNea,Denisova)	rsID	1KGp3_Global_AF	phyloP_vert	phyloP_mammal	phyloP_primate	phastCons_vert	phastCons_mammal	phastCons_primate	GerpRS	GerpRS_pVal	CADD_phred	fitCons	RegulomeDB	GREAT_regulatoryDomain_genes
[truncated: 441 more rows]

## Sheet: ROBO2_SLIT2_DCX
	variant information				annotation																		population genetics								conservation								scoring systems			gene info
[truncated: 41 more rows]
